# Supplementary material for: Single-cell sequencing of neonatal uterus reveals an Misr2+ endometrial progenitor indispensable for fertility
Source: eLife. 2019 Jun 24;8:e46349. doi: 10.7554/eLife.46349 (PMC6650247; doi:10.7554/eLife.46349)
Supplement: Figure 1—source data 1. — Related to Figure 1A, Figure 1—figure supplement 1D–E. [file elife-46349-fig1-data1.xlsx]

## Sheet: N for RNA in situ
Figure 1A (mice)	number of replicates for Misr2 in situ
Fig1-S. Fig1A-B (rats)	n (mice)	n (rats)
E17.5	1	-
E18.5	1	-
E19.5	1	-
PND 0	1	1
PND 1	-	1
PND 2	1	-
PND 3	-	3
PND 4	-	1
PND 6	3	2
PND 10	-	3
PND 15	1	1
PND 20	3	1
