# Supplementary material for: Single-cell sequencing of neonatal uterus reveals an Misr2+ endometrial progenitor indispensable for fertility
Source: eLife. 2019 Jun 24;8:e46349. doi: 10.7554/eLife.46349 (PMC6650247; doi:10.7554/eLife.46349)
Supplement: Figure 3—source data 2. — Related to Figure 3—figure supplement 4C. [file elife-46349-fig3-data2.xlsx]

## Sheet: Sheet1
	p_val	avg_logFC	pct.1	pct.2	p_val_adj
AABR07068705.1	4.4e-40	0.967464	0.808	0.562	9.76e-36
Mt.co1	7.45e-40	-0.32377	0.998	1	1.65e-35
Mt.cox3	9.39e-38	-0.319672	0.998	1	2.09e-33
Rpl36	1.03e-36	-0.873587	0.269	0.631	2.28e-32
Mt.co2	1.76e-36	-0.332573	0.992	0.999	3.92e-32
Col3a1	6.02e-36	0.65534	0.994	0.983	1.34e-31
Postn	7.1e-32	0.650486	0.944	0.825	1.58e-27
Mt.atp6	8.22e-32	-0.255755	1	1	1.83e-27
Col1a1	7.6e-26	0.465296	0.998	0.993	1.69e-21
NEWGENE_621351	2.43e-22	0.475832	0.992	0.987	5.4e-18
Rplp0	6.99e-21	-0.369333	0.795	0.927	1.55e-16
Rps14	1.17e-20	-0.447409	0.63	0.832	2.6e-16
LOC100361854	1.1e-19	-0.64891	0.282	0.541	2.45e-15
Zfp791	6.69e-19	0.858652	0.438	0.23	1.49e-14
Tmsb4x	4.13e-17	-0.364353	0.862	0.948	9.17e-13
Tagln	5.51e-17	-0.947393	0.273	0.486	1.22e-12
Rps15a	8.56e-17	-0.5435	0.288	0.529	1.9e-12
Mt.nd3	8.64e-17	-0.390981	0.72	0.891	1.92e-12
Igf2	1.47e-16	0.492167	0.868	0.809	3.27e-12
RGD1562402	1.15e-15	-0.431608	0.582	0.778	2.56e-11
RGD1565767	1.23e-15	-0.395255	0.666	0.829	2.73e-11
Rack1	1.53e-15	-0.373952	0.779	0.898	3.39e-11
Ier3	3.32e-15	-0.71459	0.165	0.377	7.36e-11
Rps3	3.95e-15	-0.379483	0.683	0.858	8.77e-11
AC121415.1	5.53e-15	-0.44482	0.499	0.697	1.23e-10
Rpl5	1.32e-14	-0.509498	0.324	0.547	2.93e-10
Rpl3	2.78e-14	-0.332563	0.823	0.897	6.16e-10
Rps16	3.89e-14	-0.357479	0.802	0.897	8.63e-10
Ccdc80	6.36e-14	0.651166	0.624	0.489	1.41e-09
Ptn	9.06e-14	0.36258	0.923	0.895	2.01e-09
Lum	1.43e-13	0.484214	0.724	0.561	3.17e-09
Rps9	1.77e-13	-0.343226	0.685	0.822	3.93e-09
Rps3a	3.07e-13	-0.365541	0.524	0.714	6.82e-09
LOC100360522	3.74e-13	-0.258592	0.823	0.914	8.31e-09
Rpsa	4.52e-13	-0.279738	0.881	0.938	1e-08
Rpl35	7.99e-13	-0.341342	0.687	0.845	1.78e-08
Rpl18	8.24e-13	-0.390202	0.66	0.791	1.83e-08
Rps13	9.3e-13	-0.417769	0.353	0.562	2.07e-08
AABR07019088.1	1.75e-12	0.618123	0.482	0.317	3.88e-08
Hsp90ab1	2.71e-12	-0.31755	0.72	0.862	6.01e-08
Rps29	2.76e-12	-0.280892	0.854	0.924	6.14e-08
Itm2a	2.9e-12	0.49583	0.71	0.578	6.44e-08
Myl9	4.81e-12	-0.555037	0.376	0.564	1.07e-07
Rpl17	4.87e-12	-0.34213	0.66	0.808	1.08e-07
Dcn	5.32e-12	0.29648	0.929	0.895	1.18e-07
Pdgfra	6.98e-12	0.567364	0.541	0.38	1.55e-07
Dpt	7.97e-12	0.499498	0.582	0.406	1.77e-07
LOC498555	1.03e-11	-0.471221	0.225	0.415	2.28e-07
Myl6	1.48e-11	-0.438578	0.628	0.772	3.29e-07
Csrnp1	1.64e-11	-0.615324	0.148	0.321	3.65e-07
Atf4	1.64e-11	-0.375069	0.413	0.626	3.65e-07
Rps21.ps1	2.06e-11	-0.422271	0.342	0.541	4.58e-07
Irf1	4.12e-11	-0.584968	0.215	0.393	9.15e-07
Sparc	6.87e-11	0.274027	0.973	0.951	1.53e-06
Rpl13a	8.86e-11	-0.386321	0.484	0.671	1.97e-06
Cdkn1c	1.24e-10	0.535832	0.501	0.347	2.75e-06
Fosb	1.54e-10	-0.532369	0.29	0.473	3.43e-06
Plpp3	2.01e-10	0.620637	0.461	0.298	4.45e-06
Eef1g	2.79e-10	-0.28253	0.672	0.809	6.19e-06
RGD1560017	4.25e-10	-0.409263	0.305	0.478	9.45e-06
Rps11	5.11e-10	-0.336383	0.639	0.772	1.13e-05
Rps27	6.41e-10	-0.334519	0.574	0.743	1.42e-05
Id1	9.45e-10	-0.526298	0.286	0.452	2.1e-05
Rps15	1.14e-09	-0.29276	0.708	0.841	2.53e-05
Rpl18a	1.23e-09	-0.278802	0.699	0.842	2.72e-05
Id3	1.44e-09	-0.40699	0.547	0.69	3.21e-05
RGD1305645	1.63e-09	-0.553894	0.138	0.288	3.61e-05
Gadd45b	2.14e-09	-0.47509	0.121	0.271	4.74e-05
Akap12	2.23e-09	0.538744	0.562	0.438	4.95e-05
Rpl21	2.23e-09	-0.328878	0.422	0.608	4.96e-05
Cox6c	2.49e-09	-0.439533	0.317	0.478	5.52e-05
Nfkbia	2.63e-09	-0.389107	0.276	0.455	5.84e-05
Csrp1	2.85e-09	-0.51415	0.324	0.476	6.33e-05
Cox7a2l	3.12e-09	-0.511568	0.246	0.405	6.93e-05
Slc25a3	3.39e-09	-0.415048	0.221	0.389	7.53e-05
Marcks	3.54e-09	0.359501	0.772	0.733	7.86e-05
Col6a2	3.69e-09	0.33618	0.833	0.791	8.2e-05
Mgp	5e-09	-0.456107	0.209	0.369	0.000111009
NEWGENE_1549776	8.54e-09	0.41993	0.278	0.141	0.00018964
Rpl10a	1.39e-08	-0.341369	0.509	0.659	0.000309455
LOC100362149	1.65e-08	-0.316894	0.449	0.614	0.000365314
Rpl32	2.8e-08	-0.259136	0.777	0.857	0.000620711
Igsf10	3e-08	0.408846	0.656	0.545	0.00066714
Hes1	3.95e-08	-0.415353	0.303	0.468	0.00087755
Uba52	6.62e-08	-0.256867	0.668	0.799	0.00147065
Shfm1	6.75e-08	-0.457992	0.123	0.251	0.00149792
Hsp90aa1	8.24e-08	-0.286752	0.355	0.524	0.00183079
Apcdd1	9.01e-08	-0.416373	0.24	0.396	0.00200054
Uqcrh	9.4e-08	-0.472458	0.19	0.324	0.00208654
Nfib	1.24e-07	0.518629	0.251	0.135	0.00275499
Rpl23a	1.32e-07	-0.283381	0.653	0.77	0.00292707
Creb3l1	1.34e-07	0.537447	0.347	0.23	0.00297583
Pkdcc	1.38e-07	0.522609	0.357	0.231	0.00306041
Cox8a	3.2e-07	-0.323245	0.384	0.534	0.00710963
Ppp1r10	3.58e-07	-0.369107	0.127	0.251	0.00795727
Ltbp4	4.21e-07	0.38072	0.701	0.657	0.00934471
Hmgb2	5.24e-07	-0.315432	0.186	0.321	0.0116363
AABR07065923.1	5.51e-07	-0.343413	0.138	0.26	0.0122457
Egr1	6.96e-07	0.315495	0.766	0.714	0.0154641
Ube2s	7.24e-07	-0.466308	0.159	0.281	0.016066
Atp5g2	7.34e-07	-0.310747	0.334	0.482	0.0162989
Mylk	8.2e-07	-0.289028	0.53	0.679	0.0181977
Csnk1a1	1.46e-06	-0.335446	0.203	0.337	0.0323394
Nedd4	1.51e-06	0.281403	0.873	0.887	0.0335357
Snrpd2	1.95e-06	-0.283149	0.146	0.265	0.0433826
AABR07025316.1	1.99e-06	0.452375	0.326	0.218	0.0441633
Tgm2	2.4e-06	-0.383392	0.173	0.296	0.0533806
Cdh11	2.86e-06	-0.318165	0.342	0.482	0.0635397
Tgfbi	3.06e-06	-0.378601	0.188	0.313	0.0678731
Tpm1	3.12e-06	-0.391514	0.495	0.611	0.0693069
Acta2	3.54e-06	-0.376598	0.441	0.562	0.0786796
Col5a1	3.6e-06	0.520081	0.342	0.242	0.0799738
Ogn	3.77e-06	0.461054	0.537	0.449	0.0838222
Cnbp	4.56e-06	-0.327285	0.299	0.42	0.101299
Rpl11	4.59e-06	-0.255351	0.637	0.736	0.10194
Stmn1	4.75e-06	-0.419739	0.157	0.267	0.105573
Atp5g3	4.78e-06	-0.272632	0.324	0.468	0.106168
LOC100911295	4.95e-06	-0.258917	0.355	0.502	0.109834
Hnrnpab	5.01e-06	-0.322061	0.33	0.461	0.11118
Prnp	6.38e-06	-0.363368	0.144	0.253	0.141631
Gpc3	7.31e-06	0.533977	0.524	0.451	0.162256
RGD1564664	7.34e-06	-0.464185	0.159	0.271	0.162944
Pcna	1.76e-05	-0.30669	0.169	0.281	0.390738
Rheb	2.25e-05	-0.375328	0.194	0.306	0.499819
RGD1304704	2.74e-05	-0.428657	0.175	0.278	0.607318
Eif1	2.86e-05	-0.261058	0.637	0.737	0.635227
AABR07057460.1	3.07e-05	-0.272484	0.253	0.37	0.680662
Fbn1	3.07e-05	0.467169	0.601	0.544	0.680828
Txn1	3.62e-05	-0.346591	0.211	0.314	0.802891
Cst3	3.7e-05	-0.342264	0.238	0.357	0.821484
Rps27l	3.92e-05	-0.367721	0.234	0.35	0.869918
Eif4a1	3.98e-05	-0.285969	0.434	0.557	0.883131
Atp5l	4.27e-05	-0.254796	0.207	0.321	0.948685
Serpinf1	4.43e-05	0.454008	0.34	0.248	0.982986
Rpl31l4	5.59e-05	-0.281149	0.251	0.363	1
Igfbp5	5.74e-05	0.357359	0.831	0.862	1
Dnajb4	7.82e-05	-0.251892	0.211	0.323	1
Actn4	8.08e-05	-0.262797	0.234	0.347	1
Igfbp3	8.73e-05	0.434655	0.405	0.314	1
RGD1563348	9.07e-05	-0.311855	0.169	0.267	1
Peg3	9.71e-05	0.399092	0.585	0.522	1
Ssr2	0.000118303	-0.326066	0.192	0.288	1
Chtop	0.000120496	-0.311713	0.188	0.286	1
Svil	0.000126875	0.581658	0.263	0.184	1
Ppp1r15a	0.000138162	-0.292963	0.284	0.389	1
Rn60_1_2212.4	0.000219204	0.266742	0.904	0.895	1
Maf1	0.000304045	-0.277353	0.182	0.273	1
Lima1	0.000331736	0.332169	0.317	0.232	1
Sptan1	0.000380953	0.401778	0.307	0.225	1
Myl12a	0.000391649	-0.259517	0.413	0.512	1
Igfbp7	0.000474452	0.298858	0.537	0.471	1
Atp5e	0.000504533	-0.317655	0.209	0.298	1
Lasp1	0.000520632	0.357509	0.288	0.209	1
Atp5c1	0.000594264	-0.270393	0.175	0.263	1
Lox	0.000597829	0.377764	0.386	0.319	1
Eif5	0.000621617	-0.27011	0.244	0.339	1
Cdc42	0.000761778	0.303931	0.537	0.476	1
Col5a2	0.0010126	0.315172	0.401	0.321	1
Anp32b	0.0010183	-0.316307	0.196	0.28	1
AC109891.2	0.00127673	0.382776	0.324	0.257	1
Pcolce	0.00128909	0.362528	0.355	0.284	1
Mmp14	0.00133276	0.275144	0.357	0.283	1
AABR07053749.1	0.00140052	0.264112	0.363	0.284	1
Sulf2	0.00224924	0.363059	0.305	0.237	1
Impad1	0.00230215	0.329951	0.351	0.278	1
Taf1d	0.00359585	0.426687	0.292	0.232	1
Galnt16	0.00431282	0.345357	0.29	0.228	1
Lrp1	0.0043623	0.279808	0.376	0.316	1
Ttyh3	0.00496461	0.257212	0.326	0.253	1
Mmp2	0.00594897	0.373096	0.438	0.392	1
Tceal8	0.00608979	-0.300723	0.232	0.297	1
Nf1x	0.00609831	0.339397	0.271	0.217	1
Vcp	0.00763923	0.270896	0.463	0.413	1
Cct4	0.0100159	-0.253981	0.248	0.308	1
Hsd11b2	0.0100479	0.437724	0.288	0.235	1
Morf4l2	0.0107071	0.297774	0.553	0.525	1
Sqstm1	0.0131068	0.259565	0.307	0.25	1
Sec31a	0.013156	0.262088	0.261	0.207	1
Ckap4	0.0133086	0.263471	0.349	0.29	1
Sfrp1	0.0135529	0.409586	0.33	0.275	1
Sf3b1	0.0214889	0.262998	0.303	0.254	1
Tgfbr3	0.0234929	0.384936	0.286	0.241	1
Sfrp2	0.0246929	0.459422	0.271	0.228	1
Ldb2	0.0248119	0.40531	0.42	0.392	1
Olfml3	0.0276388	0.290876	0.378	0.327	1
Arpc5	0.0291555	-0.255067	0.242	0.296	1
Vimp	0.0327716	0.307034	0.261	0.214	1
Sparcl1	0.0471553	0.256095	0.282	0.238	1
Ahnak	0.107064	0.257149	0.52	0.512	1
Grb10	0.110903	0.265933	0.432	0.423	1
Surf4	0.112562	0.273949	0.288	0.265	1
Tnc	0.209911	0.327373	0.392	0.39	1
Srsf11	0.268701	0.329896	0.257	0.245	1
