# Supplementary material for: Single-cell sequencing of neonatal uterus reveals an Misr2+ endometrial progenitor indispensable for fertility
Source: eLife. 2019 Jun 24;8:e46349. doi: 10.7554/eLife.46349 (PMC6650247; doi:10.7554/eLife.46349)
Supplement: Figure 3—source data 3. — First worksheet presents the sets of primers used in this study. Second worksheet presents the statistics for the QPCRs experiments: Number of replicates and p values of significance between the control and treated uterine samples for the Quantitative PCR experiments. [file elife-46349-fig3-data3.xlsx]

## Sheet: List of primers
Gene name	Forward primer	Reverse primer
Bambi	5’ CTCACCAAAGGCGAGATCAGA	5’ TGGAGAAGCAGGCACTAAGC
Bmp7	5’ CGCCCATGTTCATGTTGGAC	5’ TCGATGGTGGTATCGAGGGT
Cpxm2	5’ GACGCCTCCACCAGGTAAAA	5’ TCCAGACCAAGAGGTGGACA
Cxcl12	5’ GTAGACCCCTGAGGAAGGCT	5’ TGGTGGAGTGTCTTTGTGCT
Enpp2	5’ TGG ATGGTTTCCGTGCATCA CA	5’ CAC AGGACCGCA GTTTCTCA
Gapdh	5’ GGGGCTCTCTGCTCCTCCCTG	5’ CCAGGCGTCCGATACGGCCA
Foxa2	5’ GGCATGAACACTTACATGAGC	5’ GCGCCCACATAGGATGAC
Hdac4	5’ TGGAAGAGCTGCAGACAGTG	5’ TCAGCGAGCTGTCCAGTTTC
Klf5	5’ CAGGACGAGCCAGTGTTCG	5’ CCATTTCACATCTTGTCTGGACC
Lipg	5’ ACCCACCGGAGTACCAGTTA	5’ AACATGCCACTCATCGTCCA
Msx2	5’ GCCGCCCAGACACATGA	5’ AAGGTTCAGAGAGCTGGAGAAC
Mt3	5’ CCTACTGGTGGTTCCTGCAC	5’ AGGGACACGCAGCACTATTC
Myh11	5’ CTACACCTACTCGGGCCTCT	5’ TTTTCCAGCTCCCCCGTGAT
Ogn	5’ CTCAGCTGGACTCACACGTT	5’ GGCATGTGGGCATTTCATCA
Smad6	5’ AAGCCACTGGATCTGTCCGA	5’ GCCCTGAGGTAGGTCGTAGA
Tagln	5’ ATCCTATGGCATGAGCCGTG	5’ CAGGCTGTTCACCAACTTGC
Thbs2	5’ ATGCCATCACCGAGACAGAC	5’ CTCATCGAAACCTACGGCGA
Wfikkn2	5’ ACAGACCAGGAATGTGAGACC	5’ GGCCCTTCTTCCCTTTCACA
18S	5’ GCAATTATTCCCCATGAACG	5’ GGCCTCACTAAACCATCCAA

## Sheet: Statistics
	N (number of rat pups) at different developmental time points
Time point	CTL	MIS ( AAV9-MIS treated on PND 1)
PND 3	n=3	n=3
PND 6	n=2	n=2
PND 10	n=1	n=2
PND 15	n=2	n=2
PND 20	n=2	n=2
PND 60	n=2	n=2
Figure 1-figure supplement 1D			Figure 1-figure supplement 1F				Figure 2F
Unpaired Student's t test			Unpaired Student's t test				Unpaired Student's t test
Time point	Foxa2		Time point	Acta2	Tagln		Time point	Bmp7	Wfikkn2	Bambi	Msx2	Myh11	Thbs2
PND 6	p = 0.3567		PND 6	p = 0.3089	p = 0.1129		PND 3	p = 0.0431	p = 0.2206	p = 0.0659	p = 0.7811	p = 0.5806	p = 0.6500
PND 10	p = NA		PND 15	p = 0.2979	p = 0.7103		PND 6	p = 0.0094	p = 0.1530	p = 0.0132	p = 0.9052	p = 0.8603	p = 0.1006
PND 15	p = 0.7216		PND 60	p = 0.1472	p = 0.1129		PND 15	p = 0.0025	p = 0.0295	p = 0.2329	p = 0.0954	p = 0.4872	p = 0.2418
PND 20	p = 0.02
PND 60	p = 0.0499
Figure 3- Figure supplement 1					Figure 3- Figure supplement 2
Unpaired Student's t test					Unpaired Student's t test
Time point	Misr2	Smad6	Hdac4		Time point	Cpxm2	Enpp2	Lipg
PND 3	p = 0.8139	p = 0.1079	p = 0.9182		PND 3	p = 0.1050	p = 0.1377	p = 0.2065
PND 6	p = 0.3941	p = 0.1493	p = 0.1607		PND 6	p = 0.0101	p = 0.0693	p = 0.1435
PND 15	p = 0.4602	p = 0.3683	p = 0.0402		PND 15	p = 0.0506	p = 0.1402	p = 0.0087
