# Supplementary material for: Single-cell sequencing of neonatal uterus reveals an Misr2+ endometrial progenitor indispensable for fertility
Source: eLife. 2019 Jun 24;8:e46349. doi: 10.7554/eLife.46349 (PMC6650247; doi:10.7554/eLife.46349)
Supplement: Figure 4—source data 1. — First worksheet shows the filtered gene names depending on clusters (shown in the figures). Second worksheet includes all the gene names. Related to Figure 4B, Figure 4—figure supplement 4. [file elife-46349-fig4-data1.xlsx]

## Sheet: pvalues_means_filtered
interacting_pair	id_cp_interaction	partner_a	partner_b	ensembl_a	ensembl_b	source	secreted	is_integrin	MISR2+_progenitor_Yes_MISR2+_progenitor_Yes	MISR2+_progenitor_Yes_luminal_epithelium_Yes	MISR2+_progenitor_Yes_myometrium_Yes	inner_stroma_No_inner_stroma_No	inner_stroma_No_luminal_epithelium_No	inner_stroma_No_myometrium_No	inner_stroma_No_outer_stroma_No	luminal_epithelium_No_inner_stroma_No	luminal_epithelium_No_luminal_epithelium_No	luminal_epithelium_No_myometrium_No	luminal_epithelium_No_outer_stroma_No	luminal_epithelium_Yes_MISR2+_progenitor_Yes	luminal_epithelium_Yes_luminal_epithelium_Yes	luminal_epithelium_Yes_myometrium_Yes	myometrium_No_inner_stroma_No	myometrium_No_luminal_epithelium_No	myometrium_No_myometrium_No	myometrium_No_outer_stroma_No	myometrium_Yes_MISR2+_progenitor_Yes	myometrium_Yes_luminal_epithelium_Yes	myometrium_Yes_myometrium_Yes	outer_stroma_No_inner_stroma_No	outer_stroma_No_luminal_epithelium_No	outer_stroma_No_myometrium_No	outer_stroma_No_outer_stroma_No
CXCL12_ACKR3	CPI-SS0976BA7F0	simple:P48061	simple:P25106	ENSG00000107562	ENSG00000144476	guidetopharmacology.org	TRUE	FALSE	0.035 | 1.0	0.046 | 1.0	0.07 | 1.0	0.093 | 1.0	0.062 | 1.0	0.042 | 1.0	0.101 | 1.0	0.098 | 1.0	0.067 | 1.0	0.047 | 1.0	0.105 | 1.0	0.031 | 1.0	0.041 | 1.0	0.066 | 1.0	0.645 | 0.0	0.614 | 1.0	0.594 | 1.0	0.652 | 0.0	0.581 | 1.0	0.592 | 1.0	0.616 | 1.0	0.106 | 1.0	0.075 | 1.0	0.055 | 1.0	0.113 | 1.0
CXCL11_ACKR3	CPI-SS0747FCACD	simple:O14625	simple:P25106	ENSG00000169248	ENSG00000144476	guidetopharmacology.org	TRUE	FALSE	0.007 | 1.0	0.018 | 1.0	0.042 | 1.0	0.075 | 1.0	0.044 | 1.0	0.025 | 1.0	0.083 | 1.0	0.0 | 1.0	0.0 | 1.0	0.0 | 1.0	0.0 | 1.0	0.008 | 1.0	0.019 | 1.0	0.043 | 1.0	0.0 | 1.0	0.0 | 1.0	0.0 | 1.0	0.0 | 1.0	0.0 | 1.0	0.0 | 1.0	0.0 | 1.0	0.076 | 1.0	0.045 | 1.0	0.025 | 1.0	0.083 | 1.0
CXCL12_CXCR3	CPI-SS0EFE0B07A	simple:P48061	simple:P49682	ENSG00000107562	ENSG00000186810	guidetopharmacology.org	TRUE	FALSE	0.033 | 1.0	0.031 | 1.0	0.03 | 1.0	0.0 | 1.0	0.0 | 1.0	0.02 | 1.0	0.0 | 1.0	0.0 | 1.0	0.0 | 1.0	0.025 | 1.0	0.0 | 1.0	0.028 | 1.0	0.027 | 1.0	0.026 | 1.0	0.0 | 1.0	0.0 | 1.0	0.572 | 1.0	0.0 | 1.0	0.578 | 1.0	0.577 | 1.0	0.576 | 1.0	0.0 | 1.0	0.0 | 1.0	0.033 | 1.0	0.0 | 1.0
CXCL11_CXCR3	CPI-SS09FAC4977	simple:O14625	simple:P49682	ENSG00000169248	ENSG00000186810	curated	TRUE	FALSE	0.004 | 1.0	0.003 | 1.0	0.002 | 1.0	0.0 | 1.0	0.0 | 1.0	0.002 | 1.0	0.0 | 1.0	0.0 | 1.0	0.0 | 1.0	0.0 | 1.0	0.0 | 1.0	0.005 | 1.0	0.004 | 1.0	0.003 | 1.0	0.0 | 1.0	0.0 | 1.0	0.0 | 1.0	0.0 | 1.0	0.0 | 1.0	0.0 | 1.0	0.0 | 1.0	0.0 | 1.0	0.0 | 1.0	0.003 | 1.0	0.0 | 1.0
CCL19_CXCR3	CPI-SS07B005E6A	simple:Q99731	simple:P49682	ENSG00000172724	ENSG00000186810	guidetopharmacology.org	TRUE	FALSE	0.0 | 1.0	0.0 | 1.0	0.0 | 1.0	0.0 | 1.0	0.0 | 1.0	0.002 | 1.0	0.0 | 1.0	0.0 | 1.0	0.0 | 1.0	0.0 | 1.0	0.0 | 1.0	0.0 | 1.0	0.0 | 1.0	0.0 | 1.0	0.0 | 1.0	0.0 | 1.0	0.01 | 1.0	0.0 | 1.0	0.0 | 1.0	0.0 | 1.0	0.0 | 1.0	0.0 | 1.0	0.0 | 1.0	0.0 | 1.0	0.0 | 1.0
CXCL10_CXCR3	CPI-SS080683E15	simple:P02778	simple:P49682	ENSG00000169245	ENSG00000186810	curated	TRUE	FALSE	0.011 | 1.0	0.01 | 1.0	0.009 | 1.0	0.0 | 1.0	0.0 | 1.0	0.031 | 1.0	0.0 | 1.0	0.0 | 1.0	0.0 | 1.0	0.027 | 1.0	0.0 | 1.0	0.039 | 1.0	0.037 | 1.0	0.036 | 1.0	0.0 | 1.0	0.0 | 1.0	0.131 | 1.0	0.0 | 1.0	0.052 | 1.0	0.051 | 1.0	0.05 | 1.0	0.0 | 1.0	0.0 | 1.0	0.121 | 1.0	0.0 | 1.0
CXCL9_CXCR3	CPI-SS09A1EB4B3	simple:Q07325	simple:P49682	ENSG00000138755	ENSG00000186810	curated	TRUE	FALSE	0.004 | 1.0	0.003 | 1.0	0.002 | 1.0	0.0 | 1.0	0.0 | 1.0	0.0 | 1.0	0.0 | 1.0	0.0 | 1.0	0.0 | 1.0	0.0 | 1.0	0.0 | 1.0	0.0 | 1.0	0.0 | 1.0	0.0 | 1.0	0.0 | 1.0	0.0 | 1.0	0.003 | 1.0	0.0 | 1.0	0.008 | 1.0	0.007 | 1.0	0.006 | 1.0	0.0 | 1.0	0.0 | 1.0	0.003 | 1.0	0.0 | 1.0
CXCL12_CXCR4	CPI-SS0A28DCA72	simple:P48061	simple:P61073	ENSG00000107562	ENSG00000121966	curated	TRUE	FALSE	0.048 | 1.0	0.031 | 1.0	0.032 | 1.0	0.037 | 1.0	0.024 | 1.0	0.026 | 1.0	0.022 | 1.0	0.042 | 1.0	0.029 | 1.0	0.031 | 1.0	0.027 | 1.0	0.043 | 1.0	0.027 | 1.0	0.028 | 1.0	0.588 | 1.0	0.576 | 1.0	0.577 | 1.0	0.573 | 1.0	0.594 | 1.0	0.577 | 1.0	0.578 | 1.0	0.05 | 1.0	0.037 | 1.0	0.039 | 1.0	0.035 | 1.0
CCL19_CCRL2	CPI-SS0605AC9BF	simple:Q99731	simple:O00421	ENSG00000172724	ENSG00000121797	guidetopharmacology.org	TRUE	FALSE	0.0 | 1.0	0.0 | 1.0	0.0 | 1.0	0.005 | 1.0	0.004 | 1.0	0.003 | 1.0	0.004 | 1.0	0.0 | 1.0	0.0 | 1.0	0.0 | 1.0	0.0 | 1.0	0.0 | 1.0	0.0 | 1.0	0.0 | 1.0	0.013 | 1.0	0.012 | 1.0	0.011 | 1.0	0.012 | 1.0	0.0 | 1.0	0.0 | 1.0	0.0 | 1.0	0.0 | 1.0	0.0 | 1.0	0.0 | 1.0	0.0 | 1.0
CCL19_ACKR4	CPI-SS00AEC3818	simple:Q99731	simple:Q9NPB9	ENSG00000172724	ENSG00000129048	curated	TRUE	FALSE	0.0 | 1.0	0.0 | 1.0	0.0 | 1.0	0.002 | 1.0	0.001 | 1.0	0.0 | 1.0	0.002 | 1.0	0.0 | 1.0	0.0 | 1.0	0.0 | 1.0	0.0 | 1.0	0.0 | 1.0	0.0 | 1.0	0.0 | 1.0	0.01 | 1.0	0.009 | 1.0	0.0 | 1.0	0.01 | 1.0	0.0 | 1.0	0.0 | 1.0	0.0 | 1.0	0.0 | 1.0	0.0 | 1.0	0.0 | 1.0	0.0 | 1.0
CCL21_ACKR4	CPI-SS0ECD9BB5E	simple:O00585	simple:Q9NPB9	ENSG00000137077	ENSG00000129048	curated	TRUE	FALSE	0.005 | 1.0	0.005 | 1.0	0.0 | 1.0	0.011 | 1.0	0.01 | 1.0	0.0 | 1.0	0.01 | 1.0	0.004 | 1.0	0.004 | 1.0	0.0 | 1.0	0.004 | 1.0	0.0 | 1.0	0.0 | 1.0	0.0 | 1.0	0.009 | 1.0	0.009 | 1.0	0.0 | 1.0	0.009 | 1.0	0.0 | 1.0	0.0 | 1.0	0.0 | 1.0	0.006 | 1.0	0.006 | 1.0	0.0 | 1.0	0.006 | 1.0
CXCL13_ACKR4	CPI-SS083B5EBAB	simple:O43927	simple:Q9NPB9	ENSG00000156234	ENSG00000129048	curated	TRUE	FALSE	0.004 | 1.0	0.003 | 1.0	0.0 | 1.0	0.002 | 1.0	0.001 | 1.0	0.0 | 1.0	0.002 | 1.0	0.006 | 1.0	0.005 | 1.0	0.0 | 1.0	0.006 | 1.0	0.007 | 1.0	0.006 | 1.0	0.0 | 1.0	0.013 | 1.0	0.012 | 1.0	0.0 | 1.0	0.013 | 1.0	0.015 | 1.0	0.015 | 1.0	0.0 | 1.0	0.002 | 1.0	0.001 | 1.0	0.0 | 1.0	0.002 | 1.0
CCL19_CCR7	CPI-SS09239FB26	simple:Q99731	simple:P32248	ENSG00000172724	ENSG00000126353	curated	TRUE	FALSE	0.0 | 1.0	0.0 | 1.0	0.0 | 1.0	0.001 | 1.0	0.0 | 1.0	0.0 | 1.0	0.001 | 1.0	0.0 | 1.0	0.0 | 1.0	0.0 | 1.0	0.0 | 1.0	0.0 | 1.0	0.0 | 1.0	0.0 | 1.0	0.009 | 1.0	0.0 | 1.0	0.0 | 1.0	0.009 | 1.0	0.0 | 1.0	0.0 | 1.0	0.0 | 1.0	0.0 | 1.0	0.0 | 1.0	0.0 | 1.0	0.0 | 1.0
CCL21_CCR7	CPI-SS06C0074BD	simple:O00585	simple:P32248	ENSG00000137077	ENSG00000126353	curated	TRUE	FALSE	0.003 | 1.0	0.0 | 1.0	0.004 | 1.0	0.01 | 1.0	0.0 | 1.0	0.0 | 1.0	0.01 | 1.0	0.004 | 1.0	0.0 | 1.0	0.0 | 1.0	0.003 | 1.0	0.0 | 1.0	0.0 | 1.0	0.0 | 1.0	0.008 | 1.0	0.0 | 1.0	0.0 | 1.0	0.008 | 1.0	0.0 | 1.0	0.0 | 1.0	0.0 | 1.0	0.005 | 1.0	0.0 | 1.0	0.0 | 1.0	0.005 | 1.0
CCL11_CCR3	CPI-SS0F33890C0	simple:P51671	simple:P51677	ENSG00000172156	ENSG00000183625	curated	TRUE	FALSE	0.001 | 1.0	0.0 | 1.0	0.0 | 1.0	0.002 | 1.0	0.001 | 1.0	0.0 | 1.0	0.001 | 1.0	0.0 | 1.0	0.0 | 1.0	0.0 | 1.0	0.0 | 1.0	0.0 | 1.0	0.0 | 1.0	0.0 | 1.0	0.002 | 1.0	0.001 | 1.0	0.0 | 1.0	0.001 | 1.0	0.005 | 1.0	0.0 | 1.0	0.0 | 1.0	0.002 | 1.0	0.001 | 1.0	0.0 | 1.0	0.001 | 1.0
CCL7_CCR3	CPI-SS008CEEAB9	simple:P80098	simple:P51677	ENSG00000108688	ENSG00000183625	curated	TRUE	FALSE	0.003 | 1.0	0.0 | 1.0	0.0 | 1.0	0.004 | 1.0	0.004 | 1.0	0.0 | 1.0	0.004 | 1.0	0.007 | 1.0	0.006 | 1.0	0.0 | 1.0	0.006 | 1.0	0.005 | 1.0	0.0 | 1.0	0.0 | 1.0	0.006 | 1.0	0.006 | 1.0	0.0 | 1.0	0.006 | 1.0	0.007 | 1.0	0.0 | 1.0	0.0 | 1.0	0.002 | 1.0	0.001 | 1.0	0.0 | 1.0	0.001 | 1.0
CCL8_CCR3	CPI-SS0DF6991A8	simple:P80075	simple:P51677	ENSG00000108700	ENSG00000183625	curated	TRUE	FALSE	0.001 | 1.0	0.0 | 1.0	0.0 | 1.0	0.002 | 1.0	0.001 | 1.0	0.0 | 1.0	0.001 | 1.0	0.0 | 1.0	0.0 | 1.0	0.0 | 1.0	0.0 | 1.0	0.0 | 1.0	0.0 | 1.0	0.0 | 1.0	0.0 | 1.0	0.0 | 1.0	0.0 | 1.0	0.0 | 1.0	0.0 | 1.0	0.0 | 1.0	0.0 | 1.0	0.0 | 1.0	0.0 | 1.0	0.0 | 1.0	0.0 | 1.0
CCL26_CCR3	CPI-SS01FCCEBB9	simple:Q9Y258	simple:P51677	ENSG00000006606	ENSG00000183625	curated	TRUE	FALSE	0.002 | 1.0	0.0 | 1.0	0.0 | 1.0	0.002 | 1.0	0.001 | 1.0	0.0 | 1.0	0.001 | 1.0	0.0 | 1.0	0.0 | 1.0	0.0 | 1.0	0.0 | 1.0	0.0 | 1.0	0.0 | 1.0	0.0 | 1.0	0.002 | 1.0	0.001 | 1.0	0.0 | 1.0	0.001 | 1.0	0.0 | 1.0	0.0 | 1.0	0.0 | 1.0	0.002 | 1.0	0.001 | 1.0	0.0 | 1.0	0.001 | 1.0
CCL24_CCR3	CPI-SS0B0AC1603	simple:O00175	simple:P51677	ENSG00000106178	ENSG00000183625	curated	TRUE	FALSE	0.048 | 1.0	0.0 | 1.0	0.0 | 1.0	0.009 | 1.0	0.008 | 1.0	0.0 | 1.0	0.008 | 1.0	0.022 | 1.0	0.021 | 1.0	0.0 | 1.0	0.021 | 1.0	0.023 | 1.0	0.0 | 1.0	0.0 | 1.0	0.017 | 1.0	0.017 | 1.0	0.0 | 1.0	0.017 | 1.0	0.027 | 1.0	0.0 | 1.0	0.0 | 1.0	0.015 | 1.0	0.014 | 1.0	0.0 | 1.0	0.014 | 1.0
CCL28_CCR3	CPI-SS03B41BCDD	simple:Q9NRJ3	simple:P51677	ENSG00000151882	ENSG00000183625	guidetopharmacology.org	TRUE	FALSE	0.007 | 1.0	0.0 | 1.0	0.0 | 1.0	0.005 | 1.0	0.004 | 1.0	0.0 | 1.0	0.004 | 1.0	0.0 | 1.0	0.0 | 1.0	0.0 | 1.0	0.0 | 1.0	0.005 | 1.0	0.0 | 1.0	0.0 | 1.0	0.002 | 1.0	0.001 | 1.0	0.0 | 1.0	0.001 | 1.0	0.0 | 1.0	0.0 | 1.0	0.0 | 1.0	0.003 | 1.0	0.003 | 1.0	0.0 | 1.0	0.003 | 1.0
GCG_GLP2R	CPI-SS04D518182	simple:P01275	simple:O95838	ENSG00000115263	ENSG00000065325	guidetopharmacology.org	TRUE	FALSE	0.0 | 1.0	0.0 | 1.0	0.0 | 1.0	0.0 | 1.0	0.0 | 1.0	0.0 | 1.0	0.0 | 1.0	0.0 | 1.0	0.0 | 1.0	0.0 | 1.0	0.0 | 1.0	0.0 | 1.0	0.0 | 1.0	0.0 | 1.0	0.0 | 1.0	0.0 | 1.0	0.0 | 1.0	0.0 | 1.0	0.0 | 1.0	0.0 | 1.0	0.0 | 1.0	0.0 | 1.0	0.0 | 1.0	0.0 | 1.0	0.0 | 1.0
GCG_IDE	CPI-SS01A29DD97	simple:P01275	simple:P14735	ENSG00000115263	ENSG00000119912	InnateDB-All	TRUE	FALSE	0.024 | 1.0	0.078 | 1.0	0.036 | 1.0	0.0 | 1.0	0.0 | 1.0	0.0 | 1.0	0.0 | 1.0	0.0 | 1.0	0.0 | 1.0	0.0 | 1.0	0.0 | 1.0	0.0 | 1.0	0.0 | 1.0	0.0 | 1.0	0.0 | 1.0	0.0 | 1.0	0.0 | 1.0	0.0 | 1.0	0.028 | 1.0	0.082 | 1.0	0.04 | 1.0	0.0 | 1.0	0.0 | 1.0	0.0 | 1.0	0.0 | 1.0
IGF2_IDE	CPI-SS0A3569604	simple:P01344	simple:P14735	ENSG00000167244	ENSG00000119912	InnateDB-All	TRUE	FALSE	1.56 | 1.0	1.614 | 0.0	1.572 | 1.0	1.009 | 1.0	1.055 | 1.0	1.007 | 1.0	1.01 | 1.0	0.186 | 1.0	0.232 | 1.0	0.184 | 1.0	0.187 | 1.0	0.193 | 1.0	0.247 | 1.0	0.205 | 1.0	2.194 | 1.0	2.241 | 1.0	2.192 | 1.0	2.196 | 1.0	3.223 | 1.0	3.277 | 0.0	3.235 | 1.0	1.221 | 1.0	1.268 | 1.0	1.219 | 1.0	1.222 | 1.0
INS_IDE	CPI-SS06908C6CC	simple:P01308	simple:P14735	ENSG00000254647	ENSG00000119912	InnateDB-All	TRUE	FALSE	0.024 | 1.0	0.078 | 1.0	0.036 | 1.0	0.0 | 1.0	0.0 | 1.0	0.0 | 1.0	0.0 | 1.0	0.0 | 1.0	0.0 | 1.0	0.0 | 1.0	0.0 | 1.0	0.0 | 1.0	0.0 | 1.0	0.0 | 1.0	0.026 | 1.0	0.072 | 1.0	0.024 | 1.0	0.027 | 1.0	0.0 | 1.0	0.0 | 1.0	0.0 | 1.0	0.0 | 1.0	0.0 | 1.0	0.0 | 1.0	0.0 | 1.0
NPPB_NPR1	CPI-SS02E9C11E7	simple:P16860	simple:P16066	ENSG00000120937	ENSG00000169418	guidetopharmacology.org	TRUE	FALSE	0.0 | 1.0	0.0 | 1.0	0.0 | 1.0	0.01 | 1.0	0.006 | 1.0	0.021 | 1.0	0.013 | 1.0	0.0 | 1.0	0.0 | 1.0	0.0 | 1.0	0.0 | 1.0	0.011 | 1.0	0.008 | 1.0	0.016 | 1.0	0.0 | 1.0	0.0 | 1.0	0.0 | 1.0	0.0 | 1.0	0.0 | 1.0	0.0 | 1.0	0.0 | 1.0	0.0 | 1.0	0.0 | 1.0	0.0 | 1.0	0.0 | 1.0
NPPA_NPR1	CPI-SS032AD1183	simple:P01160	simple:P16066	ENSG00000175206	ENSG00000169418	guidetopharmacology.org	TRUE	FALSE	0.0 | 1.0	0.0 | 1.0	0.0 | 1.0	0.0 | 1.0	0.0 | 1.0	0.0 | 1.0	0.0 | 1.0	0.0 | 1.0	0.0 | 1.0	0.0 | 1.0	0.0 | 1.0	0.0 | 1.0	0.0 | 1.0	0.0 | 1.0	0.0 | 1.0	0.0 | 1.0	0.0 | 1.0	0.0 | 1.0	0.0 | 1.0	0.0 | 1.0	0.0 | 1.0	0.0 | 1.0	0.0 | 1.0	0.0 | 1.0	0.0 | 1.0
NPPB_NPR3	CPI-SS023D39112	simple:P16860	simple:P17342	ENSG00000120937	ENSG00000113389	InnateDB-All	TRUE	FALSE	0.0 | 1.0	0.0 | 1.0	0.0 | 1.0	0.003 | 1.0	0.002 | 1.0	0.008 | 1.0	0.002 | 1.0	0.0 | 1.0	0.0 | 1.0	0.0 | 1.0	0.0 | 1.0	0.006 | 1.0	0.0 | 1.0	0.0 | 1.0	0.0 | 1.0	0.0 | 1.0	0.0 | 1.0	0.0 | 1.0	0.0 | 1.0	0.0 | 1.0	0.0 | 1.0	0.0 | 1.0	0.0 | 1.0	0.0 | 1.0	0.0 | 1.0
NPPC_NPR3	CPI-SS0A3778103	simple:P23582	simple:P17342	ENSG00000163273	ENSG00000113389	InnateDB-All	TRUE	FALSE	0.005 | 1.0	0.0 | 1.0	0.0 | 1.0	0.125 | 1.0	0.124 | 1.0	0.13 | 1.0	0.124 | 1.0	0.029 | 1.0	0.028 | 1.0	0.035 | 1.0	0.029 | 1.0	0.037 | 1.0	0.0 | 1.0	0.0 | 1.0	0.017 | 1.0	0.016 | 1.0	0.022 | 1.0	0.016 | 1.0	0.011 | 1.0	0.0 | 1.0	0.0 | 1.0	0.206 | 1.0	0.205 | 1.0	0.211 | 1.0	0.205 | 1.0
OSTN_NPR3	CPI-SS02BB5E698	simple:P61366	simple:P17342	ENSG00000188729	ENSG00000113389	guidetopharmacology.org	TRUE	FALSE	0.004 | 1.0	0.0 | 1.0	0.0 | 1.0	0.004 | 1.0	0.003 | 1.0	0.01 | 1.0	0.004 | 1.0	0.004 | 1.0	0.003 | 1.0	0.009 | 1.0	0.003 | 1.0	0.0 | 1.0	0.0 | 1.0	0.0 | 1.0	0.003 | 1.0	0.002 | 1.0	0.009 | 1.0	0.003 | 1.0	0.005 | 1.0	0.0 | 1.0	0.0 | 1.0	0.003 | 1.0	0.002 | 1.0	0.008 | 1.0	0.002 | 1.0
NPPB_NPR2	CPI-SS0779676D0	simple:P16860	simple:P20594	ENSG00000120937	ENSG00000159899	InnateDB-All	TRUE	FALSE	0.0 | 1.0	0.0 | 1.0	0.0 | 1.0	0.041 | 1.0	0.007 | 1.0	0.044 | 1.0	0.053 | 1.0	0.0 | 1.0	0.0 | 1.0	0.0 | 1.0	0.0 | 1.0	0.066 | 1.0	0.01 | 1.0	0.043 | 1.0	0.0 | 1.0	0.0 | 1.0	0.0 | 1.0	0.0 | 1.0	0.0 | 1.0	0.0 | 1.0	0.0 | 1.0	0.0 | 1.0	0.0 | 1.0	0.0 | 1.0	0.0 | 1.0
NPPC_NPR2	CPI-SS04EE13FF7	simple:P23582	simple:P20594	ENSG00000163273	ENSG00000159899	guidetopharmacology.org	TRUE	FALSE	0.065 | 1.0	0.009 | 1.0	0.042 | 1.0	0.163 | 1.0	0.129 | 1.0	0.166 | 1.0	0.175 | 1.0	0.067 | 1.0	0.033 | 1.0	0.07 | 1.0	0.079 | 1.0	0.097 | 1.0	0.041 | 1.0	0.074 | 1.0	0.055 | 1.0	0.021 | 1.0	0.057 | 1.0	0.067 | 1.0	0.071 | 1.0	0.016 | 1.0	0.048 | 1.0	0.244 | 1.0	0.21 | 1.0	0.246 | 1.0	0.256 | 1.0
VIP_VIPR1	CPI-SS0C8A09915	simple:P01282	simple:P32241	ENSG00000146469	ENSG00000114812	guidetopharmacology.org	TRUE	FALSE	0.0 | 1.0	0.0 | 1.0	0.0 | 1.0	0.0 | 1.0	0.001 | 1.0	0.0 | 1.0	0.002 | 1.0	0.0 | 1.0	0.002 | 1.0	0.0 | 1.0	0.002 | 1.0	0.0 | 1.0	0.0 | 1.0	0.0 | 1.0	0.0 | 1.0	0.0 | 1.0	0.0 | 1.0	0.0 | 1.0	0.0 | 1.0	0.0 | 1.0	0.0 | 1.0	0.0 | 1.0	0.0 | 1.0	0.0 | 1.0	0.0 | 1.0
GHRH_VIPR1	CPI-SS003AFD9BA	simple:P01286	simple:P32241	ENSG00000118702	ENSG00000114812	guidetopharmacology.org	TRUE	FALSE	0.0 | 1.0	0.0 | 1.0	0.0 | 1.0	0.0 | 1.0	0.001 | 1.0	0.0 | 1.0	0.002 | 1.0	0.0 | 1.0	0.0 | 1.0	0.0 | 1.0	0.0 | 1.0	0.0 | 1.0	0.0 | 1.0	0.0 | 1.0	0.0 | 1.0	0.0 | 1.0	0.0 | 1.0	0.0 | 1.0	0.002 | 1.0	0.0 | 1.0	0.0 | 1.0	0.0 | 1.0	0.001 | 1.0	0.0 | 1.0	0.002 | 1.0
SCT_VIPR1	CPI-SS0EC70F078	simple:P09683	simple:P32241	ENSG00000070031	ENSG00000114812	InnateDB-All	TRUE	FALSE	0.008 | 1.0	0.0 | 1.0	0.0 | 1.0	0.0 | 1.0	0.002 | 1.0	0.0 | 1.0	0.002 | 1.0	0.0 | 1.0	0.002 | 1.0	0.0 | 1.0	0.003 | 1.0	0.003 | 1.0	0.0 | 1.0	0.0 | 1.0	0.0 | 1.0	0.001 | 1.0	0.0 | 1.0	0.002 | 1.0	0.0 | 1.0	0.0 | 1.0	0.0 | 1.0	0.0 | 1.0	0.002 | 1.0	0.0 | 1.0	0.002 | 1.0
CCL22_CCR4	CPI-SS052B38F1C	simple:O00626	simple:P51679	ENSG00000102962	ENSG00000183813	curated	TRUE	FALSE	0.0 | 1.0	0.005 | 1.0	0.005 | 1.0	0.0 | 1.0	0.003 | 1.0	0.0 | 1.0	0.002 | 1.0	0.0 | 1.0	0.004 | 1.0	0.0 | 1.0	0.003 | 1.0	0.0 | 1.0	0.004 | 1.0	0.004 | 1.0	0.0 | 1.0	0.003 | 1.0	0.0 | 1.0	0.002 | 1.0	0.0 | 1.0	0.003 | 1.0	0.003 | 1.0	0.0 | 1.0	0.0 | 1.0	0.0 | 1.0	0.0 | 1.0
CCL17_CCR4	CPI-SS0EDD38B58	simple:Q92583	simple:P51679	ENSG00000102970	ENSG00000183813	curated	TRUE	FALSE	0.0 | 1.0	0.003 | 1.0	0.003 | 1.0	0.0 | 1.0	0.0 | 1.0	0.0 | 1.0	0.0 | 1.0	0.0 | 1.0	0.0 | 1.0	0.0 | 1.0	0.0 | 1.0	0.0 | 1.0	0.0 | 1.0	0.0 | 1.0	0.0 | 1.0	0.0 | 1.0	0.0 | 1.0	0.0 | 1.0	0.0 | 1.0	0.0 | 1.0	0.0 | 1.0	0.0 | 1.0	0.0 | 1.0	0.0 | 1.0	0.0 | 1.0
ADCYAP1_SCTR	CPI-SS0098B5107	simple:P18509	simple:P47872	ENSG00000141433	ENSG00000080293	InnateDB-All	TRUE	FALSE	0.003 | 1.0	0.004 | 1.0	0.008 | 1.0	0.003 | 1.0	0.005 | 1.0	0.009 | 1.0	0.007 | 1.0	0.0 | 1.0	0.0 | 1.0	0.0 | 1.0	0.0 | 1.0	0.007 | 1.0	0.008 | 1.0	0.012 | 1.0	0.0 | 1.0	0.0 | 1.0	0.0 | 1.0	0.0 | 1.0	0.0 | 1.0	0.0 | 1.0	0.0 | 1.0	0.003 | 1.0	0.006 | 1.0	0.01 | 1.0	0.007 | 1.0
SCT_SCTR	CPI-SS021F26C73	simple:P09683	simple:P47872	ENSG00000070031	ENSG00000080293	guidetopharmacology.org	TRUE	FALSE	0.008 | 1.0	0.009 | 1.0	0.013 | 1.0	0.003 | 1.0	0.005 | 1.0	0.01 | 1.0	0.007 | 1.0	0.004 | 1.0	0.006 | 1.0	0.01 | 1.0	0.008 | 1.0	0.003 | 1.0	0.004 | 1.0	0.008 | 1.0	0.003 | 1.0	0.005 | 1.0	0.009 | 1.0	0.007 | 1.0	0.0 | 1.0	0.0 | 1.0	0.0 | 1.0	0.003 | 1.0	0.005 | 1.0	0.009 | 1.0	0.007 | 1.0
ADCYAP1_ADCYAP1R1	CPI-SS0133239EA	simple:P18509	simple:P41586	ENSG00000141433	ENSG00000078549	InnateDB-All	TRUE	FALSE	0.01 | 1.0	0.006 | 1.0	0.01 | 1.0	0.039 | 1.0	0.013 | 1.0	0.006 | 1.0	0.027 | 1.0	0.0 | 1.0	0.0 | 1.0	0.0 | 1.0	0.0 | 1.0	0.014 | 1.0	0.01 | 1.0	0.015 | 1.0	0.0 | 1.0	0.0 | 1.0	0.0 | 1.0	0.0 | 1.0	0.0 | 1.0	0.0 | 1.0	0.0 | 1.0	0.039 | 1.0	0.013 | 1.0	0.007 | 1.0	0.028 | 1.0
CXCL6_CXCR2	CPI-SS093B46106	simple:P80162	simple:P25025	ENSG00000124875	ENSG00000180871	curated	TRUE	FALSE	0.002 | 1.0	0.0 | 1.0	0.002 | 1.0	0.002 | 1.0	0.002 | 1.0	0.002 | 1.0	0.002 | 1.0	0.058 | 1.0	0.058 | 1.0	0.058 | 1.0	0.059 | 1.0	0.014 | 1.0	0.0 | 1.0	0.013 | 1.0	0.004 | 1.0	0.004 | 1.0	0.004 | 1.0	0.004 | 1.0	0.0 | 1.0	0.0 | 1.0	0.0 | 1.0	0.002 | 1.0	0.002 | 1.0	0.002 | 1.0	0.003 | 1.0
PPBP_CXCR2	CPI-SS0C491A3C1	simple:P02775	simple:P25025	ENSG00000163736	ENSG00000180871	curated	TRUE	FALSE	0.002 | 1.0	0.0 | 1.0	0.002 | 1.0	0.001 | 1.0	0.001 | 1.0	0.001 | 1.0	0.002 | 1.0	0.002 | 1.0	0.002 | 1.0	0.001 | 1.0	0.002 | 1.0	0.003 | 1.0	0.0 | 1.0	0.003 | 1.0	0.0 | 1.0	0.0 | 1.0	0.0 | 1.0	0.0 | 1.0	0.002 | 1.0	0.0 | 1.0	0.002 | 1.0	0.0 | 1.0	0.0 | 1.0	0.0 | 1.0	0.0 | 1.0
CXCL13_CXCR5	CPI-SS0C2437E0D	simple:O43927	simple:P32302	ENSG00000156234	ENSG00000160683	curated	TRUE	FALSE	0.002 | 1.0	0.003 | 1.0	0.002 | 1.0	0.001 | 1.0	0.001 | 1.0	0.001 | 1.0	0.001 | 1.0	0.005 | 1.0	0.005 | 1.0	0.005 | 1.0	0.005 | 1.0	0.005 | 1.0	0.006 | 1.0	0.005 | 1.0	0.012 | 1.0	0.012 | 1.0	0.012 | 1.0	0.012 | 1.0	0.014 | 1.0	0.015 | 1.0	0.014 | 1.0	0.001 | 1.0	0.001 | 1.0	0.001 | 1.0	0.001 | 1.0
TNFRSF1A_FASLG	CPI-SS0A4F27388	simple:P19438	simple:P48023	ENSG00000067182	ENSG00000117560	InnateDB-All	TRUE	FALSE	0.066 | 1.0	0.07 | 1.0	0.0 | 1.0	0.116 | 1.0	0.116 | 1.0	0.0 | 1.0	0.115 | 1.0	0.053 | 1.0	0.053 | 1.0	0.0 | 1.0	0.052 | 1.0	0.025 | 1.0	0.029 | 1.0	0.0 | 1.0	0.129 | 1.0	0.128 | 1.0	0.0 | 1.0	0.128 | 1.0	0.099 | 1.0	0.102 | 1.0	0.0 | 1.0	0.071 | 1.0	0.07 | 1.0	0.0 | 1.0	0.07 | 1.0
TNFRSF10B_FASLG	CPI-SS0049FD74F	simple:O14763	simple:P48023	ENSG00000120889	ENSG00000117560	InnateDB-All	TRUE	FALSE	0.063 | 1.0	0.067 | 1.0	0.0 | 1.0	0.042 | 1.0	0.042 | 1.0	0.0 | 1.0	0.041 | 1.0	0.14 | 1.0	0.14 | 1.0	0.0 | 1.0	0.139 | 1.0	0.098 | 1.0	0.102 | 1.0	0.0 | 1.0	0.028 | 1.0	0.027 | 1.0	0.0 | 1.0	0.027 | 1.0	0.037 | 1.0	0.041 | 1.0	0.0 | 1.0	0.031 | 1.0	0.031 | 1.0	0.0 | 1.0	0.03 | 1.0
NRG1_MS4A4A	CPI-SS0978D28AB	simple:Q02297	simple:Q96JQ5	ENSG00000157168	ENSG00000110079	IntAct	TRUE	FALSE	0.025 | 1.0	0.028 | 1.0	0.023 | 1.0	0.014 | 1.0	0.01 | 1.0	0.009 | 1.0	0.01 | 1.0	0.018 | 1.0	0.014 | 1.0	0.013 | 1.0	0.014 | 1.0	0.037 | 1.0	0.039 | 1.0	0.034 | 1.0	0.011 | 1.0	0.007 | 1.0	0.006 | 1.0	0.007 | 1.0	0.016 | 1.0	0.019 | 1.0	0.014 | 1.0	0.015 | 1.0	0.011 | 1.0	0.011 | 1.0	0.012 | 1.0
NRG1_EGFR	CPI-SS0E845281E	simple:Q02297	simple:P00533	ENSG00000157168	ENSG00000146648	IntAct	TRUE	FALSE	0.017 | 1.0	0.026 | 1.0	0.016 | 1.0	0.0 | 1.0	0.011 | 1.0	0.009 | 1.0	0.007 | 1.0	0.0 | 1.0	0.015 | 1.0	0.013 | 1.0	0.011 | 1.0	0.029 | 1.0	0.037 | 1.0	0.028 | 1.0	0.0 | 1.0	0.008 | 1.0	0.006 | 1.0	0.004 | 1.0	0.008 | 1.0	0.017 | 1.0	0.007 | 1.0	0.0 | 1.0	0.013 | 1.0	0.011 | 1.0	0.009 | 1.0
TGFA_EGFR	CPI-SS07E5C3060	simple:P01135	simple:P00533	ENSG00000163235	ENSG00000146648	curated	TRUE	FALSE	0.005 | 1.0	0.014 | 1.0	0.004 | 1.0	0.0 | 1.0	0.01 | 1.0	0.008 | 1.0	0.006 | 1.0	0.0 | 1.0	0.041 | 1.0	0.039 | 1.0	0.037 | 1.0	0.043 | 1.0	0.052 | 1.0	0.043 | 1.0	0.0 | 1.0	0.008 | 1.0	0.006 | 1.0	0.004 | 1.0	0.003 | 1.0	0.011 | 1.0	0.002 | 1.0	0.0 | 1.0	0.01 | 1.0	0.008 | 1.0	0.006 | 1.0
HBEGF_EGFR	CPI-SS09B2ACA25	simple:Q99075	simple:P00533	ENSG00000113070	ENSG00000146648	curated	TRUE	FALSE	0.02 | 1.0	0.028 | 1.0	0.019 | 1.0	0.0 | 1.0	0.019 | 1.0	0.016 | 1.0	0.015 | 1.0	0.0 | 1.0	0.188 | 1.0	0.186 | 1.0	0.184 | 1.0	0.46 | 1.0	0.469 | 1.0	0.46 | 1.0	0.0 | 1.0	0.03 | 1.0	0.027 | 1.0	0.026 | 1.0	0.027 | 1.0	0.035 | 1.0	0.026 | 1.0	0.0 | 1.0	0.016 | 1.0	0.013 | 1.0	0.012 | 1.0
EGF_EGFR	CPI-SS09947DDD9	simple:P01133	simple:P00533	ENSG00000138798	ENSG00000146648	curated	TRUE	FALSE	0.0 | 1.0	0.0 | 1.0	0.0 | 1.0	0.0 | 1.0	0.0 | 1.0	0.0 | 1.0	0.0 | 1.0	0.0 | 1.0	0.0 | 1.0	0.0 | 1.0	0.0 | 1.0	0.004 | 1.0	0.012 | 1.0	0.003 | 1.0	0.0 | 1.0	0.0 | 1.0	0.0 | 1.0	0.0 | 1.0	0.003 | 1.0	0.011 | 1.0	0.002 | 1.0	0.0 | 1.0	0.005 | 1.0	0.003 | 1.0	0.001 | 1.0
BTC_EGFR	CPI-SS0CC966B71	simple:P35070	simple:P00533	ENSG00000174808	ENSG00000146648	curated	TRUE	FALSE	0.005 | 1.0	0.014 | 1.0	0.004 | 1.0	0.0 | 1.0	0.009 | 1.0	0.006 | 1.0	0.005 | 1.0	0.0 | 1.0	0.014 | 1.0	0.011 | 1.0	0.01 | 1.0	0.01 | 1.0	0.019 | 1.0	0.009 | 1.0	0.0 | 1.0	0.007 | 1.0	0.004 | 1.0	0.003 | 1.0	0.006 | 1.0	0.015 | 1.0	0.005 | 1.0	0.0 | 1.0	0.006 | 1.0	0.004 | 1.0	0.002 | 1.0
EREG_EGFR	CPI-SS004C23DCE	simple:O14944	simple:P00533	ENSG00000124882	ENSG00000146648	curated	TRUE	FALSE	0.003 | 1.0	0.011 | 1.0	0.002 | 1.0	0.0 | 1.0	0.005 | 1.0	0.003 | 1.0	0.002 | 1.0	0.0 | 1.0	0.008 | 1.0	0.005 | 1.0	0.004 | 1.0	0.0 | 1.0	0.0 | 1.0	0.0 | 1.0	0.0 | 1.0	0.0 | 1.0	0.0 | 1.0	0.0 | 1.0	0.003 | 1.0	0.011 | 1.0	0.002 | 1.0	0.0 | 1.0	0.0 | 1.0	0.0 | 1.0	0.0 | 1.0
AREG_EGFR	CPI-SS052119104	simple:P15514	simple:P00533	ENSG00000109321	ENSG00000146648	curated	TRUE	FALSE	0.002 | 1.0	0.011 | 1.0	0.002 | 1.0	0.0 | 1.0	0.006 | 1.0	0.004 | 1.0	0.002 | 1.0	0.0 | 1.0	0.006 | 1.0	0.004 | 1.0	0.002 | 1.0	0.02 | 1.0	0.029 | 1.0	0.02 | 1.0	0.0 | 1.0	0.0 | 1.0	0.0 | 1.0	0.0 | 1.0	0.0 | 1.0	0.0 | 1.0	0.0 | 1.0	0.0 | 1.0	0.006 | 1.0	0.004 | 1.0	0.003 | 1.0
EPGN_EGFR	CPI-SS060790CF0	simple:Q6UW88	simple:P00533	ENSG00000182585	ENSG00000146648	curated	TRUE	FALSE	0.003 | 1.0	0.011 | 1.0	0.002 | 1.0	0.0 | 1.0	0.0 | 1.0	0.0 | 1.0	0.0 | 1.0	0.0 | 1.0	0.007 | 1.0	0.004 | 1.0	0.003 | 1.0	0.008 | 1.0	0.017 | 1.0	0.007 | 1.0	0.0 | 1.0	0.0 | 1.0	0.0 | 1.0	0.0 | 1.0	0.0 | 1.0	0.0 | 1.0	0.0 | 1.0	0.0 | 1.0	0.005 | 1.0	0.003 | 1.0	0.002 | 1.0
NRG1_ERBB4	CPI-SS0BD5C2A23	simple:Q02297	simple:Q15303	ENSG00000157168	ENSG00000178568	curated	TRUE	FALSE	0.016 | 1.0	0.0 | 1.0	0.016 | 1.0	0.007 | 1.0	0.008 | 1.0	0.009 | 1.0	0.007 | 1.0	0.011 | 1.0	0.012 | 1.0	0.013 | 1.0	0.011 | 1.0	0.028 | 1.0	0.0 | 1.0	0.028 | 1.0	0.004 | 1.0	0.005 | 1.0	0.006 | 1.0	0.004 | 1.0	0.007 | 1.0	0.0 | 1.0	0.007 | 1.0	0.009 | 1.0	0.01 | 1.0	0.011 | 1.0	0.009 | 1.0
HBEGF_ERBB4	CPI-SS060B846D1	simple:Q99075	simple:Q15303	ENSG00000113070	ENSG00000178568	curated	TRUE	FALSE	0.018 | 1.0	0.0 | 1.0	0.019 | 1.0	0.014 | 1.0	0.016 | 1.0	0.016 | 1.0	0.015 | 1.0	0.184 | 1.0	0.185 | 1.0	0.186 | 1.0	0.184 | 1.0	0.459 | 1.0	0.0 | 1.0	0.46 | 1.0	0.026 | 1.0	0.027 | 1.0	0.027 | 1.0	0.026 | 1.0	0.026 | 1.0	0.0 | 1.0	0.026 | 1.0	0.012 | 1.0	0.013 | 1.0	0.013 | 1.0	0.012 | 1.0
BTC_ERBB4	CPI-SS0F0D7F25C	simple:P35070	simple:Q15303	ENSG00000174808	ENSG00000178568	curated	TRUE	FALSE	0.004 | 1.0	0.0 | 1.0	0.004 | 1.0	0.005 | 1.0	0.006 | 1.0	0.006 | 1.0	0.005 | 1.0	0.01 | 1.0	0.011 | 1.0	0.011 | 1.0	0.01 | 1.0	0.009 | 1.0	0.0 | 1.0	0.009 | 1.0	0.003 | 1.0	0.004 | 1.0	0.004 | 1.0	0.003 | 1.0	0.005 | 1.0	0.0 | 1.0	0.005 | 1.0	0.002 | 1.0	0.003 | 1.0	0.004 | 1.0	0.002 | 1.0
EREG_ERBB4	CPI-SS0FC42EC80	simple:O14944	simple:Q15303	ENSG00000124882	ENSG00000178568	curated	TRUE	FALSE	0.002 | 1.0	0.0 | 1.0	0.002 | 1.0	0.001 | 1.0	0.002 | 1.0	0.003 | 1.0	0.002 | 1.0	0.004 | 1.0	0.005 | 1.0	0.005 | 1.0	0.004 | 1.0	0.0 | 1.0	0.0 | 1.0	0.0 | 1.0	0.0 | 1.0	0.0 | 1.0	0.0 | 1.0	0.0 | 1.0	0.002 | 1.0	0.0 | 1.0	0.002 | 1.0	0.0 | 1.0	0.0 | 1.0	0.0 | 1.0	0.0 | 1.0
NRG2_ERBB4	CPI-SS0E063192D	simple:O14511	simple:Q15303	ENSG00000158458	ENSG00000178568	curated	TRUE	FALSE	0.01 | 1.0	0.0 | 1.0	0.011 | 1.0	0.005 | 1.0	0.006 | 1.0	0.006 | 1.0	0.005 | 1.0	0.005 | 1.0	0.006 | 1.0	0.007 | 1.0	0.005 | 1.0	0.007 | 1.0	0.0 | 1.0	0.007 | 1.0	0.003 | 1.0	0.004 | 1.0	0.004 | 1.0	0.003 | 1.0	0.006 | 1.0	0.0 | 1.0	0.006 | 1.0	0.01 | 1.0	0.011 | 1.0	0.012 | 1.0	0.011 | 1.0
NRG3_ERBB4	CPI-SS0D5E30C6C	simple:P56975	simple:Q15303	ENSG00000185737	ENSG00000178568	curated	TRUE	FALSE	0.001 | 1.0	0.0 | 1.0	0.002 | 1.0	0.0 | 1.0	0.0 | 1.0	0.0 | 1.0	0.0 | 1.0	0.0 | 1.0	0.0 | 1.0	0.0 | 1.0	0.0 | 1.0	0.0 | 1.0	0.0 | 1.0	0.0 | 1.0	0.002 | 1.0	0.003 | 1.0	0.004 | 1.0	0.002 | 1.0	0.0 | 1.0	0.0 | 1.0	0.0 | 1.0	0.001 | 1.0	0.002 | 1.0	0.003 | 1.0	0.001 | 1.0
NRG4_ERBB4	CPI-SS0627D0E22	simple:Q8WWG1	simple:Q15303	ENSG00000169752	ENSG00000178568	curated	TRUE	FALSE	0.002 | 1.0	0.0 | 1.0	0.002 | 1.0	0.001 | 1.0	0.002 | 1.0	0.003 | 1.0	0.002 | 1.0	0.0 | 1.0	0.0 | 1.0	0.0 | 1.0	0.0 | 1.0	0.0 | 1.0	0.0 | 1.0	0.0 | 1.0	0.001 | 1.0	0.002 | 1.0	0.003 | 1.0	0.001 | 1.0	0.002 | 1.0	0.0 | 1.0	0.002 | 1.0	0.0 | 1.0	0.0 | 1.0	0.0 | 1.0	0.0 | 1.0
NRG1_ERBB3	CPI-SS02B906C26	simple:Q02297	simple:P21860	ENSG00000157168	ENSG00000065361	curated	TRUE	FALSE	0.042 | 1.0	0.046 | 1.0	0.02 | 1.0	0.008 | 1.0	0.058 | 1.0	0.007 | 1.0	0.013 | 1.0	0.013 | 1.0	0.062 | 1.0	0.011 | 1.0	0.017 | 1.0	0.054 | 1.0	0.058 | 1.0	0.032 | 1.0	0.005 | 1.0	0.055 | 1.0	0.004 | 1.0	0.01 | 1.0	0.033 | 1.0	0.037 | 1.0	0.011 | 1.0	0.01 | 1.0	0.059 | 1.0	0.009 | 1.0	0.014 | 1.0
BTC_ERBB3	CPI-SS05A6C9EC5	simple:P35070	simple:P21860	ENSG00000174808	ENSG00000065361	curated	TRUE	FALSE	0.03 | 1.0	0.034 | 1.0	0.008 | 1.0	0.006 | 1.0	0.055 | 1.0	0.005 | 1.0	0.01 | 1.0	0.011 | 1.0	0.06 | 1.0	0.01 | 1.0	0.015 | 1.0	0.035 | 1.0	0.039 | 1.0	0.014 | 1.0	0.004 | 1.0	0.053 | 1.0	0.003 | 1.0	0.008 | 1.0	0.031 | 1.0	0.035 | 1.0	0.009 | 1.0	0.003 | 1.0	0.053 | 1.0	0.002 | 1.0	0.008 | 1.0
NRG2_ERBB3	CPI-SS053613259	simple:O14511	simple:P21860	ENSG00000158458	ENSG00000065361	curated	TRUE	FALSE	0.036 | 1.0	0.041 | 1.0	0.015 | 1.0	0.006 | 1.0	0.055 | 1.0	0.005 | 1.0	0.01 | 1.0	0.006 | 1.0	0.056 | 1.0	0.005 | 1.0	0.011 | 1.0	0.033 | 1.0	0.037 | 1.0	0.011 | 1.0	0.004 | 1.0	0.053 | 1.0	0.003 | 1.0	0.008 | 1.0	0.032 | 1.0	0.036 | 1.0	0.01 | 1.0	0.012 | 1.0	0.061 | 1.0	0.011 | 1.0	0.016 | 1.0
CCL7_CCR1	CPI-SS02CC53E89	simple:P80098	simple:P32246	ENSG00000108688	ENSG00000163823	curated	TRUE	FALSE	0.0 | 1.0	0.0 | 1.0	0.003 | 1.0	0.004 | 1.0	0.004 | 1.0	0.004 | 1.0	0.0 | 1.0	0.006 | 1.0	0.006 | 1.0	0.006 | 1.0	0.0 | 1.0	0.0 | 1.0	0.0 | 1.0	0.005 | 1.0	0.006 | 1.0	0.006 | 1.0	0.006 | 1.0	0.0 | 1.0	0.0 | 1.0	0.0 | 1.0	0.007 | 1.0	0.001 | 1.0	0.001 | 1.0	0.001 | 1.0	0.0 | 1.0
CCL8_CCR1	CPI-SS087054090	simple:P80075	simple:P32246	ENSG00000108700	ENSG00000163823	curated	TRUE	FALSE	0.0 | 1.0	0.0 | 1.0	0.002 | 1.0	0.001 | 1.0	0.001 | 1.0	0.001 | 1.0	0.0 | 1.0	0.0 | 1.0	0.0 | 1.0	0.0 | 1.0	0.0 | 1.0	0.0 | 1.0	0.0 | 1.0	0.0 | 1.0	0.0 | 1.0	0.0 | 1.0	0.0 | 1.0	0.0 | 1.0	0.0 | 1.0	0.0 | 1.0	0.0 | 1.0	0.0 | 1.0	0.0 | 1.0	0.0 | 1.0	0.0 | 1.0
CCL26_CCR1	CPI-SS0F06E4B3F	simple:Q9Y258	simple:P32246	ENSG00000006606	ENSG00000163823	curated	TRUE	FALSE	0.0 | 1.0	0.0 | 1.0	0.002 | 1.0	0.001 | 1.0	0.001 | 1.0	0.001 | 1.0	0.0 | 1.0	0.0 | 1.0	0.0 | 1.0	0.0 | 1.0	0.0 | 1.0	0.0 | 1.0	0.0 | 1.0	0.0 | 1.0	0.002 | 1.0	0.001 | 1.0	0.001 | 1.0	0.0 | 1.0	0.0 | 1.0	0.0 | 1.0	0.0 | 1.0	0.001 | 1.0	0.001 | 1.0	0.001 | 1.0	0.0 | 1.0
CCL7_ACKR2	CPI-SS0FD442A0E	simple:P80098	simple:O00590	ENSG00000108688	ENSG00000144648	curated	TRUE	FALSE	0.003 | 1.0	0.0 | 1.0	0.0 | 1.0	0.003 | 1.0	0.0 | 1.0	0.004 | 1.0	0.003 | 1.0	0.006 | 1.0	0.0 | 1.0	0.006 | 1.0	0.006 | 1.0	0.005 | 1.0	0.0 | 1.0	0.0 | 1.0	0.005 | 1.0	0.0 | 1.0	0.006 | 1.0	0.005 | 1.0	0.007 | 1.0	0.0 | 1.0	0.0 | 1.0	0.001 | 1.0	0.0 | 1.0	0.001 | 1.0	0.001 | 1.0
CCL8_ACKR2	CPI-SS0F6F1C29E	simple:P80075	simple:O00590	ENSG00000108700	ENSG00000144648	curated	TRUE	FALSE	0.001 | 1.0	0.0 | 1.0	0.0 | 1.0	0.001 | 1.0	0.0 | 1.0	0.001 | 1.0	0.001 | 1.0	0.0 | 1.0	0.0 | 1.0	0.0 | 1.0	0.0 | 1.0	0.0 | 1.0	0.0 | 1.0	0.0 | 1.0	0.0 | 1.0	0.0 | 1.0	0.0 | 1.0	0.0 | 1.0	0.0 | 1.0	0.0 | 1.0	0.0 | 1.0	0.0 | 1.0	0.0 | 1.0	0.0 | 1.0	0.0 | 1.0
CCL7_CCR5	CPI-SS09C16258E	simple:P80098	simple:P51681	ENSG00000108688	ENSG00000160791	curated	TRUE	FALSE	0.028 | 1.0	0.029 | 1.0	0.019 | 1.0	0.012 | 1.0	0.013 | 1.0	0.011 | 1.0	0.013 | 1.0	0.015 | 1.0	0.015 | 1.0	0.013 | 1.0	0.016 | 1.0	0.03 | 1.0	0.031 | 1.0	0.021 | 1.0	0.014 | 1.0	0.015 | 1.0	0.013 | 1.0	0.016 | 1.0	0.032 | 1.0	0.033 | 1.0	0.023 | 1.0	0.01 | 1.0	0.01 | 1.0	0.008 | 1.0	0.011 | 1.0
CCL8_CCR5	CPI-SS0C30EC0DE	simple:P80075	simple:P51681	ENSG00000108700	ENSG00000160791	curated	TRUE	FALSE	0.026 | 1.0	0.028 | 1.0	0.017 | 1.0	0.01 | 1.0	0.01 | 1.0	0.008 | 1.0	0.011 | 1.0	0.0 | 1.0	0.0 | 1.0	0.0 | 1.0	0.0 | 1.0	0.0 | 1.0	0.0 | 1.0	0.0 | 1.0	0.0 | 1.0	0.0 | 1.0	0.0 | 1.0	0.0 | 1.0	0.0 | 1.0	0.0 | 1.0	0.0 | 1.0	0.0 | 1.0	0.0 | 1.0	0.0 | 1.0	0.0 | 1.0
CCL28_CCR10	CPI-SS0BCCA6596	simple:Q9NRJ3	simple:P46092	ENSG00000151882	ENSG00000184451	guidetopharmacology.org	TRUE	FALSE	0.007 | 1.0	0.0 | 1.0	0.009 | 1.0	0.005 | 1.0	0.004 | 1.0	0.006 | 1.0	0.006 | 1.0	0.0 | 1.0	0.0 | 1.0	0.0 | 1.0	0.0 | 1.0	0.005 | 1.0	0.0 | 1.0	0.007 | 1.0	0.002 | 1.0	0.001 | 1.0	0.003 | 1.0	0.003 | 1.0	0.0 | 1.0	0.0 | 1.0	0.0 | 1.0	0.003 | 1.0	0.003 | 1.0	0.004 | 1.0	0.004 | 1.0
CCL27_CCR10	CPI-SS0BFCF6B11	simple:Q9Y4X3	simple:P46092	ENSG00000213927	ENSG00000184451	curated	TRUE	FALSE	0.003 | 1.0	0.0 | 1.0	0.005 | 1.0	0.004 | 1.0	0.004 | 1.0	0.005 | 1.0	0.005 | 1.0	0.012 | 1.0	0.012 | 1.0	0.014 | 1.0	0.013 | 1.0	0.003 | 1.0	0.0 | 1.0	0.005 | 1.0	0.004 | 1.0	0.004 | 1.0	0.005 | 1.0	0.005 | 1.0	0.002 | 1.0	0.0 | 1.0	0.004 | 1.0	0.003 | 1.0	0.003 | 1.0	0.004 | 1.0	0.004 | 1.0
KLRG1_CDH1	CPI-SS0854A5B2B	simple:Q96E93	simple:P12830	ENSG00000139187	ENSG00000039068	curated	FALSE	FALSE	0.017 | 1.0	1.148 | 1.0	0.018 | 1.0	0.0 | 1.0	0.0 | 1.0	0.0 | 1.0	0.0 | 1.0	0.03 | 1.0	1.143 | 1.0	0.017 | 1.0	0.018 | 1.0	0.021 | 1.0	1.151 | 1.0	0.022 | 1.0	0.03 | 1.0	1.143 | 1.0	0.016 | 1.0	0.018 | 1.0	0.018 | 1.0	1.148 | 1.0	0.019 | 1.0	0.03 | 1.0	1.143 | 1.0	0.017 | 1.0	0.018 | 1.0
MAFA_CDH1	CPI-SS0854A5B2B	simple:Q96E93	simple:P12830	ENSG00000182759	ENSG00000039068	curated	FALSE	FALSE	0.017 | 1.0	1.148 | 1.0	0.018 | 1.0	0.0 | 1.0	0.0 | 1.0	0.0 | 1.0	0.0 | 1.0	0.0 | 1.0	0.0 | 1.0	0.0 | 1.0	0.0 | 1.0	0.0 | 1.0	0.0 | 1.0	0.0 | 1.0	0.0 | 1.0	0.0 | 1.0	0.0 | 1.0	0.0 | 1.0	0.018 | 1.0	1.148 | 1.0	0.019 | 1.0	0.0 | 1.0	0.0 | 1.0	0.0 | 1.0	0.0 | 1.0
ACKR2_CCL2	CPI-SS03165AD8C	simple:O00590	simple:P13500	ENSG00000144648	ENSG00000108691	curated	TRUE	FALSE	0.004 | 1.0	0.005 | 1.0	0.087 | 1.0	0.017 | 1.0	0.001 | 1.0	0.089 | 1.0	0.023 | 1.0	0.0 | 1.0	0.0 | 1.0	0.0 | 1.0	0.0 | 1.0	0.0 | 1.0	0.0 | 1.0	0.0 | 1.0	0.017 | 1.0	0.001 | 1.0	0.09 | 1.0	0.024 | 1.0	0.0 | 1.0	0.0 | 1.0	0.0 | 1.0	0.017 | 1.0	0.001 | 1.0	0.089 | 1.0	0.023 | 1.0
SPN_ICAM1	CPI-SS092AA7A93	simple:P16150	simple:P05362	ENSG00000197471	ENSG00000090339	curated	FALSE	FALSE	0.021 | 1.0	0.04 | 1.0	0.084 | 1.0	0.04 | 1.0	0.027 | 1.0	0.155 | 1.0	0.062 | 1.0	0.053 | 1.0	0.04 | 1.0	0.167 | 1.0	0.074 | 1.0	0.022 | 1.0	0.041 | 1.0	0.086 | 1.0	0.04 | 1.0	0.026 | 1.0	0.154 | 1.0	0.061 | 1.0	0.015 | 1.0	0.034 | 1.0	0.078 | 1.0	0.04 | 1.0	0.027 | 1.0	0.154 | 1.0	0.061 | 1.0
HBEGF_CD44	CPI-SS0CF76A867	simple:Q99075	simple:P16070	ENSG00000113070	ENSG00000026508	InnateDB-All	TRUE	FALSE	0.023 | 1.0	0.032 | 1.0	0.039 | 1.0	0.016 | 1.0	0.044 | 1.0	0.036 | 1.0	0.019 | 1.0	0.185 | 1.0	0.214 | 1.0	0.205 | 1.0	0.188 | 1.0	0.463 | 1.0	0.473 | 1.0	0.479 | 1.0	0.027 | 1.0	0.056 | 1.0	0.047 | 1.0	0.03 | 1.0	0.03 | 1.0	0.04 | 1.0	0.046 | 1.0	0.013 | 1.0	0.041 | 1.0	0.033 | 1.0	0.016 | 1.0
SPP1_CD44	CPI-SS02AB0C3E0	simple:P10451	simple:P16070	ENSG00000118785	ENSG00000026508	IntAct	TRUE	FALSE	0.005 | 1.0	0.015 | 1.0	0.021 | 1.0	0.004 | 1.0	0.032 | 1.0	0.023 | 1.0	0.006 | 1.0	0.009 | 1.0	0.037 | 1.0	0.028 | 1.0	0.011 | 1.0	0.04 | 1.0	0.05 | 1.0	0.056 | 1.0	0.003 | 1.0	0.032 | 1.0	0.023 | 1.0	0.006 | 1.0	0.0 | 1.0	0.0 | 1.0	0.0 | 1.0	0.004 | 1.0	0.032 | 1.0	0.023 | 1.0	0.006 | 1.0
SELE_CD44	CPI-SS0D329BE85	simple:P16581	simple:P16070	ENSG00000007908	ENSG00000026508	curated	FALSE	FALSE	0.009 | 1.0	0.018 | 1.0	0.025 | 1.0	0.003 | 1.0	0.031 | 1.0	0.022 | 1.0	0.006 | 1.0	0.004 | 1.0	0.033 | 1.0	0.024 | 1.0	0.007 | 1.0	0.007 | 1.0	0.017 | 1.0	0.023 | 1.0	0.003 | 1.0	0.032 | 1.0	0.023 | 1.0	0.006 | 1.0	0.0 | 1.0	0.0 | 1.0	0.0 | 1.0	0.003 | 1.0	0.032 | 1.0	0.023 | 1.0	0.006 | 1.0
TNFRSF1A_TNFSF13	CPI-SS018588D3A	simple:P19438	simple:O75888	ENSG00000067182	ENSG00000161955	InnateDB-All	TRUE	FALSE	0.075 | 1.0	0.12 | 1.0	0.078 | 1.0	0.144 | 1.0	0.178 | 1.0	0.128 | 1.0	0.151 | 1.0	0.08 | 1.0	0.114 | 1.0	0.065 | 1.0	0.087 | 1.0	0.034 | 1.0	0.079 | 1.0	0.037 | 1.0	0.156 | 1.0	0.19 | 1.0	0.141 | 1.0	0.163 | 1.0	0.107 | 1.0	0.152 | 1.0	0.111 | 1.0	0.098 | 1.0	0.132 | 1.0	0.083 | 1.0	0.105 | 1.0
FAS_TNFSF13	CPI-SS00ADA045A	simple:P25445	simple:O75888	ENSG00000026103	ENSG00000161955	InnateDB-All	TRUE	FALSE	0.011 | 1.0	0.056 | 1.0	0.015 | 1.0	0.031 | 1.0	0.065 | 1.0	0.015 | 1.0	0.038 | 1.0	0.03 | 1.0	0.064 | 1.0	0.014 | 1.0	0.037 | 1.0	0.013 | 1.0	0.058 | 1.0	0.017 | 1.0	0.035 | 1.0	0.069 | 1.0	0.019 | 1.0	0.042 | 1.0	0.013 | 1.0	0.058 | 1.0	0.017 | 1.0	0.035 | 1.0	0.069 | 1.0	0.02 | 1.0	0.042 | 1.0
SELE_GLG1	CPI-SS04F90EE0D	simple:P16581	simple:Q92896	ENSG00000007908	ENSG00000090863	curated	FALSE	FALSE	0.13 | 1.0	0.149 | 1.0	0.195 | 1.0	0.133 | 1.0	0.133 | 1.0	0.17 | 1.0	0.128 | 1.0	0.135 | 1.0	0.134 | 1.0	0.171 | 1.0	0.129 | 1.0	0.128 | 1.0	0.147 | 1.0	0.193 | 1.0	0.134 | 1.0	0.133 | 1.0	0.17 | 1.0	0.129 | 1.0	0.0 | 1.0	0.0 | 1.0	0.0 | 1.0	0.134 | 1.0	0.133 | 1.0	0.17 | 1.0	0.129 | 1.0
CXCL6_CXCR1	CPI-SS03818E1DD	simple:P80162	simple:P25024	ENSG00000124875	ENSG00000163464	curated	TRUE	FALSE	0.007 | 1.0	0.007 | 1.0	0.004 | 1.0	0.002 | 1.0	0.005 | 1.0	0.0 | 1.0	0.002 | 1.0	0.058 | 1.0	0.061 | 1.0	0.0 | 1.0	0.058 | 1.0	0.018 | 1.0	0.019 | 1.0	0.016 | 1.0	0.004 | 1.0	0.007 | 1.0	0.0 | 1.0	0.004 | 1.0	0.0 | 1.0	0.0 | 1.0	0.0 | 1.0	0.002 | 1.0	0.005 | 1.0	0.0 | 1.0	0.003 | 1.0
GH1_PRLR	CPI-SS0A606E2DA	simple:P01241	simple:P16471	ENSG00000259384	ENSG00000113494	IntAct	TRUE	FALSE	0.0 | 1.0	0.0 | 1.0	0.0 | 1.0	0.002 | 1.0	0.003 | 1.0	0.004 | 1.0	0.003 | 1.0	0.002 | 1.0	0.002 | 1.0	0.004 | 1.0	0.002 | 1.0	0.0 | 1.0	0.0 | 1.0	0.0 | 1.0	0.0 | 1.0	0.0 | 1.0	0.0 | 1.0	0.0 | 1.0	0.0 | 1.0	0.0 | 1.0	0.0 | 1.0	0.001 | 1.0	0.002 | 1.0	0.003 | 1.0	0.002 | 1.0
CSHL1_PRLR	CPI-SS05F6B4FED	simple:Q14406	simple:P16471	ENSG00000204414	ENSG00000113494	guidetopharmacology.org	TRUE	FALSE	0.0 | 1.0	0.0 | 1.0	0.0 | 1.0	0.002 | 1.0	0.003 | 1.0	0.004 | 1.0	0.003 | 1.0	0.002 | 1.0	0.002 | 1.0	0.004 | 1.0	0.002 | 1.0	0.0 | 1.0	0.0 | 1.0	0.0 | 1.0	0.0 | 1.0	0.0 | 1.0	0.0 | 1.0	0.0 | 1.0	0.0 | 1.0	0.0 | 1.0	0.0 | 1.0	0.001 | 1.0	0.002 | 1.0	0.003 | 1.0	0.002 | 1.0
PRL_PRLR	CPI-SS00689751B	simple:P01236	simple:P16471	ENSG00000172179	ENSG00000113494	IntAct	TRUE	FALSE	0.018 | 1.0	0.022 | 1.0	0.02 | 1.0	0.014 | 1.0	0.015 | 1.0	0.016 | 1.0	0.015 | 1.0	0.015 | 1.0	0.016 | 1.0	0.017 | 1.0	0.016 | 1.0	0.019 | 1.0	0.023 | 1.0	0.021 | 1.0	0.015 | 1.0	0.016 | 1.0	0.017 | 1.0	0.016 | 1.0	0.012 | 1.0	0.016 | 1.0	0.014 | 1.0	0.012 | 1.0	0.012 | 1.0	0.014 | 1.0	0.012 | 1.0
GH1_GHR	CPI-SS0ACD3CCEE	simple:P01241	simple:P10912	ENSG00000259384	ENSG00000112964	guidetopharmacology.org	TRUE	FALSE	0.0 | 1.0	0.0 | 1.0	0.0 | 1.0	0.01 | 1.0	0.004 | 1.0	0.012 | 1.0	0.021 | 1.0	0.009 | 1.0	0.004 | 1.0	0.012 | 1.0	0.021 | 1.0	0.0 | 1.0	0.0 | 1.0	0.0 | 1.0	0.0 | 1.0	0.0 | 1.0	0.0 | 1.0	0.0 | 1.0	0.0 | 1.0	0.0 | 1.0	0.0 | 1.0	0.009 | 1.0	0.003 | 1.0	0.011 | 1.0	0.02 | 1.0
GH2_GHR	CPI-SS0DB45E7DF	simple:P01242	simple:P10912	ENSG00000136487	ENSG00000112964	guidetopharmacology.org	TRUE	FALSE	0.0 | 1.0	0.0 | 1.0	0.0 | 1.0	0.01 | 1.0	0.004 | 1.0	0.012 | 1.0	0.021 | 1.0	0.009 | 1.0	0.004 | 1.0	0.012 | 1.0	0.021 | 1.0	0.0 | 1.0	0.0 | 1.0	0.0 | 1.0	0.0 | 1.0	0.0 | 1.0	0.0 | 1.0	0.0 | 1.0	0.0 | 1.0	0.0 | 1.0	0.0 | 1.0	0.009 | 1.0	0.003 | 1.0	0.011 | 1.0	0.02 | 1.0
CSF3_CSF1R	CPI-SS094EDDBBA	simple:P09919	simple:P07333	ENSG00000108342	ENSG00000182578	guidetopharmacology.org	TRUE	FALSE	0.003 | 1.0	0.009 | 1.0	0.006 | 1.0	0.003 | 1.0	0.001 | 1.0	0.008 | 1.0	0.002 | 1.0	0.003 | 1.0	0.002 | 1.0	0.008 | 1.0	0.003 | 1.0	0.0 | 1.0	0.0 | 1.0	0.0 | 1.0	0.0 | 1.0	0.0 | 1.0	0.0 | 1.0	0.0 | 1.0	0.0 | 1.0	0.0 | 1.0	0.0 | 1.0	0.004 | 1.0	0.002 | 1.0	0.009 | 1.0	0.003 | 1.0
CSF1_CSF1R	CPI-SS0AB1F04A0	simple:P09603	simple:P07333	ENSG00000184371	ENSG00000182578	curated	TRUE	FALSE	0.022 | 1.0	0.028 | 1.0	0.025 | 1.0	0.016 | 1.0	0.015 | 1.0	0.021 | 1.0	0.016 | 1.0	0.022 | 1.0	0.021 | 1.0	0.027 | 1.0	0.022 | 1.0	0.023 | 1.0	0.029 | 1.0	0.026 | 1.0	0.044 | 1.0	0.042 | 1.0	0.049 | 1.0	0.044 | 1.0	0.064 | 1.0	0.07 | 1.0	0.067 | 1.0	0.025 | 1.0	0.023 | 1.0	0.03 | 1.0	0.024 | 1.0
IL34_CSF1R	CPI-SS015162AFC	simple:Q6ZMJ4	simple:P07333	ENSG00000157368	ENSG00000182578	curated	TRUE	FALSE	0.005 | 1.0	0.011 | 1.0	0.008 | 1.0	0.008 | 1.0	0.006 | 1.0	0.013 | 1.0	0.007 | 1.0	0.003 | 1.0	0.002 | 1.0	0.008 | 1.0	0.003 | 1.0	0.007 | 1.0	0.012 | 1.0	0.009 | 1.0	0.009 | 1.0	0.007 | 1.0	0.014 | 1.0	0.008 | 1.0	0.004 | 1.0	0.009 | 1.0	0.006 | 1.0	0.008 | 1.0	0.007 | 1.0	0.013 | 1.0	0.008 | 1.0
CSF3_CSF3R	CPI-SS08376F0E6	simple:P09919	simple:Q99062	ENSG00000108342	ENSG00000119535	curated	TRUE	FALSE	0.007 | 1.0	0.003 | 1.0	0.002 | 1.0	0.003 | 1.0	0.001 | 1.0	0.003 | 1.0	0.003 | 1.0	0.004 | 1.0	0.002 | 1.0	0.003 | 1.0	0.003 | 1.0	0.0 | 1.0	0.0 | 1.0	0.0 | 1.0	0.0 | 1.0	0.0 | 1.0	0.0 | 1.0	0.0 | 1.0	0.0 | 1.0	0.0 | 1.0	0.0 | 1.0	0.004 | 1.0	0.002 | 1.0	0.004 | 1.0	0.004 | 1.0
EGFR_TGFB1	CPI-SS0055264F3	simple:P00533	simple:P01137	ENSG00000146648	ENSG00000105329	MINT	TRUE	FALSE	0.008 | 1.0	0.0 | 1.0	0.004 | 1.0	0.0 | 1.0	0.0 | 1.0	0.0 | 1.0	0.0 | 1.0	0.005 | 1.0	0.005 | 1.0	0.0 | 1.0	0.005 | 1.0	0.017 | 1.0	0.0 | 1.0	0.012 | 1.0	0.003 | 1.0	0.003 | 1.0	0.0 | 1.0	0.003 | 1.0	0.008 | 1.0	0.0 | 1.0	0.003 | 1.0	0.001 | 1.0	0.002 | 1.0	0.0 | 1.0	0.002 | 1.0
TGFBR3_TGFB1	CPI-SS0322F3EA0	simple:Q03167	simple:P01137	ENSG00000069702	ENSG00000105329	curated	TRUE	FALSE	0.034 | 1.0	0.0 | 1.0	0.03 | 1.0	0.044 | 1.0	0.044 | 1.0	0.0 | 1.0	0.044 | 1.0	0.012 | 1.0	0.012 | 1.0	0.0 | 1.0	0.012 | 1.0	0.021 | 1.0	0.0 | 1.0	0.017 | 1.0	0.201 | 1.0	0.201 | 1.0	0.0 | 1.0	0.201 | 1.0	0.29 | 1.0	0.0 | 1.0	0.286 | 1.0	0.095 | 1.0	0.096 | 1.0	0.0 | 1.0	0.096 | 1.0
TGFBR3_TGFB3	CPI-SS0B4EEA780	simple:Q03167	simple:P10600	ENSG00000069702	ENSG00000119699	curated	TRUE	FALSE	0.041 | 1.0	0.044 | 1.0	0.069 | 1.0	0.061 | 1.0	0.067 | 1.0	0.082 | 1.0	0.075 | 1.0	0.029 | 1.0	0.035 | 1.0	0.05 | 1.0	0.043 | 1.0	0.028 | 1.0	0.031 | 1.0	0.056 | 1.0	0.217 | 1.0	0.224 | 1.0	0.239 | 1.0	0.232 | 1.0	0.298 | 1.0	0.301 | 1.0	0.326 | 1.0	0.112 | 1.0	0.118 | 1.0	0.134 | 1.0	0.127 | 1.0
TTR_AGER	CPI-SS06006F870	simple:P02766	simple:Q15109	ENSG00000118271	ENSG00000204305	MINT	TRUE	FALSE	0.011 | 1.0	0.0 | 1.0	0.012 | 1.0	0.0 | 1.0	0.0 | 1.0	0.0 | 1.0	0.0 | 1.0	0.008 | 1.0	0.007 | 1.0	0.007 | 1.0	0.008 | 1.0	0.0 | 1.0	0.0 | 1.0	0.0 | 1.0	0.0 | 1.0	0.0 | 1.0	0.0 | 1.0	0.0 | 1.0	0.0 | 1.0	0.0 | 1.0	0.0 | 1.0	0.0 | 1.0	0.0 | 1.0	0.0 | 1.0	0.0 | 1.0
TTR_DDR1	CPI-SS00D3CD86E	simple:P02766	simple:Q08345	ENSG00000118271	ENSG00000204580	IntAct	TRUE	FALSE	0.053 | 1.0	0.121 | 1.0	0.035 | 1.0	0.0 | 1.0	0.0 | 1.0	0.0 | 1.0	0.0 | 1.0	0.032 | 1.0	0.088 | 1.0	0.023 | 1.0	0.03 | 1.0	0.0 | 1.0	0.0 | 1.0	0.0 | 1.0	0.0 | 1.0	0.0 | 1.0	0.0 | 1.0	0.0 | 1.0	0.0 | 1.0	0.0 | 1.0	0.0 | 1.0	0.0 | 1.0	0.0 | 1.0	0.0 | 1.0	0.0 | 1.0
APP_CD74	CPI-SS080C81D37	simple:P05067	simple:P04233	ENSG00000142192	ENSG00000019582	curated	FALSE	FALSE	0.46 | 1.0	0.469 | 1.0	0.461 | 1.0	0.499 | 1.0	0.51 | 1.0	0.499 | 1.0	0.5 | 1.0	0.66 | 1.0	0.672 | 1.0	0.66 | 1.0	0.662 | 1.0	0.647 | 1.0	0.656 | 1.0	0.647 | 1.0	0.6 | 1.0	0.611 | 1.0	0.6 | 1.0	0.601 | 1.0	0.555 | 1.0	0.564 | 1.0	0.555 | 1.0	0.606 | 1.0	0.618 | 1.0	0.606 | 1.0	0.607 | 1.0
NRP2_VEGFA	CPI-SS0E00478B4	simple:O60462	simple:P15692	ENSG00000118257	ENSG00000112715	curated	TRUE	FALSE	0.372 | 1.0	0.099 | 1.0	0.176 | 1.0	0.44 | 1.0	0.133 | 1.0	0.239 | 1.0	0.401 | 1.0	0.443 | 1.0	0.136 | 1.0	0.243 | 1.0	0.404 | 1.0	0.377 | 1.0	0.104 | 1.0	0.182 | 1.0	0.518 | 0.0	0.211 | 1.0	0.317 | 0.828	0.479 | 0.0	0.407 | 1.0	0.134 | 1.0	0.212 | 1.0	0.47 | 1.0	0.163 | 1.0	0.269 | 1.0	0.431 | 1.0
KDR_VEGFA	CPI-SS043D33875	simple:P35968	simple:P15692	ENSG00000128052	ENSG00000112715	curated	TRUE	FALSE	0.47 | 0.0	0.197 | 1.0	0.275 | 0.976	0.423 | 1.0	0.116 | 1.0	0.222 | 1.0	0.383 | 1.0	0.422 | 1.0	0.115 | 1.0	0.221 | 1.0	0.383 | 1.0	0.373 | 1.0	0.1 | 1.0	0.177 | 1.0	0.43 | 1.0	0.123 | 1.0	0.23 | 1.0	0.391 | 1.0	0.365 | 1.0	0.092 | 1.0	0.17 | 1.0	0.426 | 1.0	0.119 | 1.0	0.226 | 1.0	0.387 | 1.0
FLT1_VEGFA	CPI-SS0C8F2C0F6	simple:P17948	simple:P15692	ENSG00000102755	ENSG00000112715	curated	TRUE	FALSE	0.36 | 1.0	0.087 | 1.0	0.165 | 1.0	0.421 | 1.0	0.114 | 1.0	0.221 | 1.0	0.382 | 1.0	0.426 | 1.0	0.119 | 1.0	0.225 | 1.0	0.387 | 1.0	0.364 | 1.0	0.091 | 1.0	0.169 | 1.0	0.422 | 1.0	0.115 | 1.0	0.222 | 1.0	0.383 | 1.0	0.359 | 1.0	0.086 | 1.0	0.164 | 1.0	0.419 | 1.0	0.112 | 1.0	0.219 | 1.0	0.38 | 1.0
NRP1_VEGFA	CPI-SS0DE0A486F	simple:O14786	simple:P15692	ENSG00000099250	ENSG00000112715	curated	TRUE	FALSE	0.566 | 0.0	0.293 | 1.0	0.37 | 1.0	0.579 | 0.0	0.272 | 1.0	0.379 | 1.0	0.54 | 0.0	0.472 | 1.0	0.165 | 1.0	0.271 | 1.0	0.433 | 1.0	0.414 | 1.0	0.141 | 1.0	0.219 | 1.0	0.65 | 0.0	0.343 | 1.0	0.45 | 0.821	0.611 | 0.0	0.641 | 0.0	0.368 | 1.0	0.446 | 0.778	0.591 | 0.0	0.284 | 1.0	0.39 | 1.0	0.551 | 0.0
NRP2_SEMA3F	CPI-SS0F15C1AB3	simple:O60462	simple:Q13275	ENSG00000118257	ENSG00000001617	curated	TRUE	FALSE	0.029 | 1.0	0.063 | 1.0	0.042 | 1.0	0.047 | 1.0	0.064 | 1.0	0.046 | 1.0	0.048 | 1.0	0.05 | 1.0	0.067 | 1.0	0.05 | 1.0	0.052 | 1.0	0.034 | 1.0	0.068 | 1.0	0.047 | 1.0	0.124 | 1.0	0.141 | 1.0	0.124 | 1.0	0.126 | 1.0	0.065 | 1.0	0.099 | 1.0	0.077 | 1.0	0.077 | 1.0	0.094 | 1.0	0.076 | 1.0	0.078 | 1.0
NRP2_PGF	CPI-SS0D22A09AD	simple:O60462	simple:P49763	ENSG00000118257	ENSG00000119630	curated	TRUE	FALSE	0.021 | 1.0	0.0 | 1.0	0.023 | 1.0	0.027 | 1.0	0.025 | 1.0	0.038 | 1.0	0.037 | 1.0	0.031 | 1.0	0.028 | 1.0	0.041 | 1.0	0.04 | 1.0	0.026 | 1.0	0.0 | 1.0	0.028 | 1.0	0.105 | 1.0	0.103 | 1.0	0.115 | 1.0	0.115 | 1.0	0.057 | 1.0	0.0 | 1.0	0.058 | 1.0	0.058 | 1.0	0.055 | 1.0	0.068 | 1.0	0.067 | 1.0
FLT1_PGF	CPI-SS0E61DB5DF	simple:P17948	simple:P49763	ENSG00000102755	ENSG00000119630	curated	TRUE	FALSE	0.01 | 1.0	0.0 | 1.0	0.012 | 1.0	0.009 | 1.0	0.006 | 1.0	0.019 | 1.0	0.018 | 1.0	0.013 | 1.0	0.011 | 1.0	0.023 | 1.0	0.023 | 1.0	0.014 | 1.0	0.0 | 1.0	0.016 | 1.0	0.01 | 1.0	0.007 | 1.0	0.02 | 1.0	0.019 | 1.0	0.009 | 1.0	0.0 | 1.0	0.01 | 1.0	0.007 | 1.0	0.004 | 1.0	0.017 | 1.0	0.016 | 1.0
NRP1_PGF	CPI-SS0855C0353	simple:O14786	simple:P49763	ENSG00000099250	ENSG00000119630	curated	TRUE	FALSE	0.215 | 1.0	0.0 | 1.0	0.217 | 1.0	0.167 | 1.0	0.164 | 1.0	0.177 | 1.0	0.176 | 1.0	0.06 | 1.0	0.057 | 1.0	0.07 | 1.0	0.069 | 1.0	0.064 | 1.0	0.0 | 1.0	0.065 | 1.0	0.238 | 1.0	0.235 | 1.0	0.248 | 1.0	0.248 | 1.0	0.29 | 1.0	0.0 | 1.0	0.292 | 1.0	0.178 | 1.0	0.176 | 1.0	0.188 | 1.0	0.188 | 1.0
NRP2_SEMA3C	CPI-SS0241A1F57	simple:O60462	simple:Q99985	ENSG00000118257	ENSG00000075223	curated	TRUE	FALSE	0.033 | 1.0	0.07 | 1.0	0.111 | 1.0	0.056 | 1.0	0.098 | 1.0	0.095 | 1.0	0.084 | 1.0	0.06 | 1.0	0.101 | 1.0	0.098 | 1.0	0.087 | 1.0	0.038 | 1.0	0.075 | 1.0	0.116 | 1.0	0.134 | 1.0	0.176 | 0.0	0.173 | 1.0	0.162 | 1.0	0.069 | 1.0	0.105 | 1.0	0.146 | 1.0	0.086 | 1.0	0.128 | 1.0	0.125 | 1.0	0.114 | 1.0
FLT1_VEGFB	CPI-SS0947A8549	simple:P17948	simple:P49765	ENSG00000102755	ENSG00000173511	curated	TRUE	FALSE	0.081 | 1.0	0.037 | 1.0	0.04 | 1.0	0.066 | 1.0	0.042 | 1.0	0.05 | 1.0	0.053 | 1.0	0.071 | 1.0	0.046 | 1.0	0.054 | 1.0	0.057 | 1.0	0.085 | 1.0	0.041 | 1.0	0.044 | 1.0	0.067 | 1.0	0.043 | 1.0	0.051 | 1.0	0.054 | 1.0	0.08 | 1.0	0.036 | 1.0	0.039 | 1.0	0.064 | 1.0	0.04 | 1.0	0.048 | 1.0	0.051 | 1.0
NRP1_VEGFB	CPI-SS033E6DE7E	simple:O14786	simple:P49765	ENSG00000099250	ENSG00000173511	curated	TRUE	FALSE	0.286 | 0.0	0.243 | 1.0	0.245 | 1.0	0.224 | 1.0	0.2 | 1.0	0.208 | 1.0	0.211 | 1.0	0.117 | 1.0	0.093 | 1.0	0.101 | 1.0	0.104 | 1.0	0.135 | 1.0	0.091 | 1.0	0.094 | 1.0	0.295 | 1.0	0.271 | 1.0	0.279 | 1.0	0.282 | 1.0	0.362 | 0.0	0.318 | 1.0	0.32 | 1.0	0.236 | 1.0	0.211 | 1.0	0.219 | 1.0	0.222 | 1.0
ADRB2_VEGFB	CPI-SS098425155	simple:P07550	simple:P49765	ENSG00000169252	ENSG00000173511	InnateDB-All	TRUE	FALSE	0.096 | 1.0	0.052 | 1.0	0.054 | 1.0	0.072 | 1.0	0.048 | 1.0	0.055 | 1.0	0.058 | 1.0	0.07 | 1.0	0.046 | 1.0	0.054 | 1.0	0.056 | 1.0	0.091 | 1.0	0.048 | 1.0	0.05 | 1.0	0.086 | 1.0	0.062 | 1.0	0.07 | 1.0	0.072 | 1.0	0.092 | 1.0	0.049 | 1.0	0.051 | 1.0	0.08 | 1.0	0.056 | 1.0	0.064 | 1.0	0.067 | 1.0
KDR_VEGFC	CPI-SS0273C9AED	simple:P35968	simple:P49767	ENSG00000128052	ENSG00000150630	curated	TRUE	FALSE	0.116 | 1.0	0.116 | 1.0	0.13 | 1.0	0.018 | 1.0	0.012 | 1.0	0.034 | 1.0	0.014 | 1.0	0.017 | 1.0	0.011 | 1.0	0.033 | 1.0	0.013 | 1.0	0.019 | 1.0	0.019 | 1.0	0.032 | 1.0	0.026 | 1.0	0.02 | 1.0	0.042 | 1.0	0.022 | 1.0	0.012 | 1.0	0.011 | 1.0	0.025 | 1.0	0.022 | 1.0	0.016 | 1.0	0.038 | 1.0	0.018 | 1.0
KDR_VEGFD	CPI-SS065A6EF06	simple:P35968	simple:O43915	ENSG00000128052	ENSG00000165197	curated	TRUE	FALSE	0.114 | 1.0	0.0 | 1.0	0.18 | 1.0	0.009 | 1.0	0.01 | 1.0	0.051 | 1.0	0.008 | 1.0	0.009 | 1.0	0.009 | 1.0	0.051 | 1.0	0.007 | 1.0	0.017 | 1.0	0.0 | 1.0	0.082 | 1.0	0.017 | 1.0	0.017 | 1.0	0.059 | 1.0	0.015 | 1.0	0.009 | 1.0	0.0 | 1.0	0.075 | 1.0	0.013 | 1.0	0.014 | 1.0	0.055 | 1.0	0.011 | 1.0
NRP1_SEMA3A	CPI-SS08083B141	simple:O14786	simple:Q14563	ENSG00000099250	ENSG00000075213	curated	TRUE	FALSE	0.211 | 1.0	0.21 | 1.0	0.21 | 1.0	0.163 | 1.0	0.0 | 1.0	0.166 | 1.0	0.164 | 1.0	0.056 | 1.0	0.0 | 1.0	0.059 | 1.0	0.057 | 1.0	0.06 | 1.0	0.058 | 1.0	0.058 | 1.0	0.234 | 1.0	0.0 | 1.0	0.237 | 1.0	0.235 | 1.0	0.287 | 1.0	0.285 | 1.0	0.285 | 1.0	0.174 | 1.0	0.0 | 1.0	0.178 | 1.0	0.176 | 1.0
FASLG_FAS	CPI-SS0D168412F	simple:P48023	simple:P25445	ENSG00000117560	ENSG00000026103	curated	TRUE	FALSE	0.003 | 1.0	0.005 | 1.0	0.005 | 1.0	0.003 | 1.0	0.003 | 1.0	0.008 | 1.0	0.008 | 1.0	0.003 | 1.0	0.002 | 1.0	0.007 | 1.0	0.008 | 1.0	0.006 | 1.0	0.008 | 1.0	0.008 | 1.0	0.0 | 1.0	0.0 | 1.0	0.0 | 1.0	0.0 | 1.0	0.0 | 1.0	0.0 | 1.0	0.0 | 1.0	0.002 | 1.0	0.002 | 1.0	0.007 | 1.0	0.007 | 1.0
ACKR2_CCL11	CPI-SS08E13FAF2	simple:O00590	simple:P51671	ENSG00000144648	ENSG00000172156	curated	TRUE	FALSE	0.001 | 1.0	0.0 | 1.0	0.005 | 1.0	0.001 | 1.0	0.0 | 1.0	0.001 | 1.0	0.001 | 1.0	0.0 | 1.0	0.0 | 1.0	0.0 | 1.0	0.0 | 1.0	0.0 | 1.0	0.0 | 1.0	0.0 | 1.0	0.001 | 1.0	0.0 | 1.0	0.001 | 1.0	0.001 | 1.0	0.0 | 1.0	0.0 | 1.0	0.0 | 1.0	0.001 | 1.0	0.0 | 1.0	0.001 | 1.0	0.001 | 1.0
SCGB3A1_FGFR4	CPI-SS08A0C3910	simple:Q96QR1	simple:P22455	ENSG00000161055	ENSG00000160867	MINT	TRUE	FALSE	0.014 | 1.0	0.0 | 1.0	0.008 | 1.0	0.017 | 1.0	0.0 | 1.0	0.016 | 1.0	0.012 | 1.0	0.017 | 1.0	0.0 | 1.0	0.016 | 1.0	0.013 | 1.0	0.0 | 1.0	0.0 | 1.0	0.0 | 1.0	0.017 | 1.0	0.0 | 1.0	0.016 | 1.0	0.012 | 1.0	0.0 | 1.0	0.0 | 1.0	0.0 | 1.0	0.017 | 1.0	0.0 | 1.0	0.015 | 1.0	0.012 | 1.0
FGF1_FGFR4	CPI-SS0D9366D11	simple:P05230	simple:P22455	ENSG00000113578	ENSG00000160867	IntAct	TRUE	FALSE	0.015 | 1.0	0.0 | 1.0	0.01 | 1.0	0.025 | 1.0	0.0 | 1.0	0.024 | 1.0	0.02 | 1.0	0.022 | 1.0	0.0 | 1.0	0.02 | 1.0	0.017 | 1.0	0.018 | 1.0	0.0 | 1.0	0.012 | 1.0	0.021 | 1.0	0.0 | 1.0	0.019 | 1.0	0.016 | 1.0	0.016 | 1.0	0.0 | 1.0	0.01 | 1.0	0.018 | 1.0	0.0 | 1.0	0.016 | 1.0	0.013 | 1.0
FGF2_FGFR4	CPI-SS008FB916C	simple:P09038	simple:P22455	ENSG00000138685	ENSG00000160867	curated	TRUE	FALSE	0.012 | 1.0	0.0 | 1.0	0.007 | 1.0	0.017 | 1.0	0.0 | 1.0	0.016 | 1.0	0.012 | 1.0	0.018 | 1.0	0.0 | 1.0	0.017 | 1.0	0.013 | 1.0	0.014 | 1.0	0.0 | 1.0	0.008 | 1.0	0.017 | 1.0	0.0 | 1.0	0.015 | 1.0	0.012 | 1.0	0.015 | 1.0	0.0 | 1.0	0.009 | 1.0	0.017 | 1.0	0.0 | 1.0	0.015 | 1.0	0.012 | 1.0
FGF5_FGFR4	CPI-SS066347638	simple:P12034	simple:P22455	ENSG00000138675	ENSG00000160867	IntAct	TRUE	FALSE	0.0 | 1.0	0.0 | 1.0	0.0 | 1.0	0.016 | 1.0	0.0 | 1.0	0.015 | 1.0	0.012 | 1.0	0.0 | 1.0	0.0 | 1.0	0.0 | 1.0	0.0 | 1.0	0.0 | 1.0	0.0 | 1.0	0.0 | 1.0	0.0 | 1.0	0.0 | 1.0	0.0 | 1.0	0.0 | 1.0	0.014 | 1.0	0.0 | 1.0	0.008 | 1.0	0.016 | 1.0	0.0 | 1.0	0.015 | 1.0	0.011 | 1.0
FGF1_FGFR2	CPI-SS04A97448D	simple:P05230	simple:P21802	ENSG00000113578	ENSG00000066468	MINT	TRUE	FALSE	0.745 | 1.0	0.18 | 1.0	0.094 | 1.0	0.122 | 1.0	0.353 | 1.0	0.143 | 1.0	0.079 | 1.0	0.119 | 1.0	0.349 | 1.0	0.14 | 1.0	0.075 | 1.0	0.748 | 1.0	0.183 | 1.0	0.097 | 1.0	0.118 | 1.0	0.348 | 1.0	0.138 | 1.0	0.074 | 1.0	0.746 | 1.0	0.181 | 1.0	0.095 | 1.0	0.115 | 1.0	0.345 | 1.0	0.135 | 1.0	0.071 | 1.0
FGF2_FGFR2	CPI-SS05A94DE17	simple:P09038	simple:P21802	ENSG00000138685	ENSG00000066468	curated	TRUE	FALSE	0.742 | 1.0	0.177 | 1.0	0.091 | 1.0	0.114 | 1.0	0.345 | 1.0	0.135 | 1.0	0.071 | 1.0	0.115 | 1.0	0.346 | 1.0	0.136 | 1.0	0.072 | 1.0	0.744 | 1.0	0.178 | 1.0	0.093 | 1.0	0.113 | 1.0	0.344 | 1.0	0.134 | 1.0	0.07 | 1.0	0.745 | 1.0	0.179 | 1.0	0.094 | 1.0	0.114 | 1.0	0.344 | 1.0	0.134 | 1.0	0.07 | 1.0
FGF7_FGFR2	CPI-SS0E928B8C8	simple:P21781	simple:P21802	ENSG00000140285	ENSG00000066468	IntAct	TRUE	FALSE	0.0 | 1.0	0.0 | 1.0	0.0 | 1.0	0.0 | 1.0	0.0 | 1.0	0.0 | 1.0	0.0 | 1.0	0.0 | 1.0	0.0 | 1.0	0.0 | 1.0	0.0 | 1.0	0.0 | 1.0	0.0 | 1.0	0.0 | 1.0	0.113 | 1.0	0.344 | 1.0	0.134 | 1.0	0.07 | 1.0	0.0 | 1.0	0.0 | 1.0	0.0 | 1.0	0.113 | 1.0	0.344 | 1.0	0.134 | 1.0	0.07 | 1.0
FGF8_FGFR2	CPI-SS0C77C0D65	simple:P55075	simple:P21802	ENSG00000107831	ENSG00000066468	IntAct	TRUE	FALSE	0.742 | 1.0	0.177 | 1.0	0.091 | 1.0	0.0 | 1.0	0.0 | 1.0	0.0 | 1.0	0.0 | 1.0	0.114 | 1.0	0.344 | 1.0	0.134 | 1.0	0.07 | 1.0	0.0 | 1.0	0.0 | 1.0	0.0 | 1.0	0.0 | 1.0	0.0 | 1.0	0.0 | 1.0	0.0 | 1.0	0.744 | 1.0	0.178 | 1.0	0.093 | 1.0	0.0 | 1.0	0.0 | 1.0	0.0 | 1.0	0.0 | 1.0
FGF9_FGFR2	CPI-SS07B324162	simple:P31371	simple:P21802	ENSG00000102678	ENSG00000066468	InnateDB-All	TRUE	FALSE	0.75 | 1.0	0.185 | 1.0	0.099 | 1.0	0.123 | 1.0	0.353 | 1.0	0.144 | 1.0	0.08 | 1.0	0.83 | 0.0	1.06 | 0.0	0.85 | 0.0	0.786 | 0.0	1.184 | 0.0	0.618 | 0.0	0.533 | 0.0	0.124 | 1.0	0.354 | 1.0	0.144 | 1.0	0.08 | 1.0	0.746 | 1.0	0.181 | 1.0	0.095 | 1.0	0.12 | 1.0	0.351 | 1.0	0.141 | 1.0	0.077 | 1.0
FGF23_FGFR2	CPI-SS092FB7770	simple:Q9GZV9	simple:P21802	ENSG00000118972	ENSG00000066468	IntAct	TRUE	FALSE	0.0 | 1.0	0.0 | 1.0	0.0 | 1.0	0.113 | 1.0	0.344 | 1.0	0.134 | 1.0	0.07 | 1.0	0.0 | 1.0	0.0 | 1.0	0.0 | 1.0	0.0 | 1.0	0.0 | 1.0	0.0 | 1.0	0.0 | 1.0	0.113 | 1.0	0.344 | 1.0	0.134 | 1.0	0.07 | 1.0	0.0 | 1.0	0.0 | 1.0	0.0 | 1.0	0.0 | 1.0	0.0 | 1.0	0.0 | 1.0	0.0 | 1.0
FGF6_FGFR2	CPI-SS08883E9F6	simple:P10767	simple:P21802	ENSG00000111241	ENSG00000066468	InnateDB-All	TRUE	FALSE	0.742 | 1.0	0.177 | 1.0	0.091 | 1.0	0.113 | 1.0	0.344 | 1.0	0.134 | 1.0	0.07 | 1.0	0.0 | 1.0	0.0 | 1.0	0.0 | 1.0	0.0 | 1.0	0.0 | 1.0	0.0 | 1.0	0.0 | 1.0	0.0 | 1.0	0.0 | 1.0	0.0 | 1.0	0.0 | 1.0	0.0 | 1.0	0.0 | 1.0	0.0 | 1.0	0.113 | 1.0	0.344 | 1.0	0.134 | 1.0	0.07 | 1.0
FGF1_FGFR1	CPI-SS0755A26DD	simple:P05230	simple:P11362	ENSG00000113578	ENSG00000077782	curated	TRUE	FALSE	0.009 | 1.0	0.007 | 1.0	0.006 | 1.0	0.01 | 1.0	0.011 | 1.0	0.011 | 1.0	0.01 | 1.0	0.007 | 1.0	0.008 | 1.0	0.008 | 1.0	0.007 | 1.0	0.012 | 1.0	0.01 | 1.0	0.009 | 1.0	0.006 | 1.0	0.007 | 1.0	0.006 | 1.0	0.006 | 1.0	0.01 | 1.0	0.008 | 1.0	0.007 | 1.0	0.003 | 1.0	0.003 | 1.0	0.003 | 1.0	0.003 | 1.0
FGF1_FLG	CPI-SS0755A26DD	simple:P05230	simple:P11362	ENSG00000113578	ENSG00000143631	curated	TRUE	FALSE	0.0 | 1.0	0.0 | 1.0	0.0 | 1.0	0.0 | 1.0	0.0 | 1.0	0.0 | 1.0	0.01 | 1.0	0.0 | 1.0	0.0 | 1.0	0.0 | 1.0	0.007 | 1.0	0.0 | 1.0	0.0 | 1.0	0.0 | 1.0	0.0 | 1.0	0.0 | 1.0	0.0 | 1.0	0.006 | 1.0	0.0 | 1.0	0.0 | 1.0	0.0 | 1.0	0.0 | 1.0	0.0 | 1.0	0.0 | 1.0	0.003 | 1.0
FGF2_FGFR1	CPI-SS01F67987A	simple:P09038	simple:P11362	ENSG00000138685	ENSG00000077782	curated	TRUE	FALSE	0.006 | 1.0	0.005 | 1.0	0.004 | 1.0	0.002 | 1.0	0.003 | 1.0	0.003 | 1.0	0.002 | 1.0	0.003 | 1.0	0.004 | 1.0	0.004 | 1.0	0.003 | 1.0	0.008 | 1.0	0.006 | 1.0	0.005 | 1.0	0.002 | 1.0	0.002 | 1.0	0.002 | 1.0	0.001 | 1.0	0.009 | 1.0	0.007 | 1.0	0.006 | 1.0	0.002 | 1.0	0.002 | 1.0	0.002 | 1.0	0.002 | 1.0
FGF2_FLG	CPI-SS01F67987A	simple:P09038	simple:P11362	ENSG00000138685	ENSG00000143631	curated	TRUE	FALSE	0.0 | 1.0	0.0 | 1.0	0.0 | 1.0	0.0 | 1.0	0.0 | 1.0	0.0 | 1.0	0.002 | 1.0	0.0 | 1.0	0.0 | 1.0	0.0 | 1.0	0.003 | 1.0	0.0 | 1.0	0.0 | 1.0	0.0 | 1.0	0.0 | 1.0	0.0 | 1.0	0.0 | 1.0	0.001 | 1.0	0.0 | 1.0	0.0 | 1.0	0.0 | 1.0	0.0 | 1.0	0.0 | 1.0	0.0 | 1.0	0.002 | 1.0
FGF8_FGFR1	CPI-SS02B9A88D3	simple:P55075	simple:P11362	ENSG00000107831	ENSG00000077782	IntAct	TRUE	FALSE	0.006 | 1.0	0.005 | 1.0	0.004 | 1.0	0.0 | 1.0	0.0 | 1.0	0.0 | 1.0	0.0 | 1.0	0.002 | 1.0	0.002 | 1.0	0.002 | 1.0	0.002 | 1.0	0.0 | 1.0	0.0 | 1.0	0.0 | 1.0	0.0 | 1.0	0.0 | 1.0	0.0 | 1.0	0.0 | 1.0	0.008 | 1.0	0.006 | 1.0	0.005 | 1.0	0.0 | 1.0	0.0 | 1.0	0.0 | 1.0	0.0 | 1.0
FGF8_FLG	CPI-SS02B9A88D3	simple:P55075	simple:P11362	ENSG00000107831	ENSG00000143631	IntAct	TRUE	FALSE	0.0 | 1.0	0.0 | 1.0	0.0 | 1.0	0.0 | 1.0	0.0 | 1.0	0.0 | 1.0	0.0 | 1.0	0.0 | 1.0	0.0 | 1.0	0.0 | 1.0	0.002 | 1.0	0.0 | 1.0	0.0 | 1.0	0.0 | 1.0	0.0 | 1.0	0.0 | 1.0	0.0 | 1.0	0.0 | 1.0	0.0 | 1.0	0.0 | 1.0	0.0 | 1.0	0.0 | 1.0	0.0 | 1.0	0.0 | 1.0	0.0 | 1.0
FGF23_FGFR1	CPI-SS09015A868	simple:Q9GZV9	simple:P11362	ENSG00000118972	ENSG00000077782	InnateDB-All	TRUE	FALSE	0.0 | 1.0	0.0 | 1.0	0.0 | 1.0	0.001 | 1.0	0.002 | 1.0	0.002 | 1.0	0.001 | 1.0	0.0 | 1.0	0.0 | 1.0	0.0 | 1.0	0.0 | 1.0	0.0 | 1.0	0.0 | 1.0	0.0 | 1.0	0.002 | 1.0	0.002 | 1.0	0.002 | 1.0	0.001 | 1.0	0.0 | 1.0	0.0 | 1.0	0.0 | 1.0	0.0 | 1.0	0.0 | 1.0	0.0 | 1.0	0.0 | 1.0
FGF23_FLG	CPI-SS09015A868	simple:Q9GZV9	simple:P11362	ENSG00000118972	ENSG00000143631	InnateDB-All	TRUE	FALSE	0.0 | 1.0	0.0 | 1.0	0.0 | 1.0	0.0 | 1.0	0.0 | 1.0	0.0 | 1.0	0.001 | 1.0	0.0 | 1.0	0.0 | 1.0	0.0 | 1.0	0.0 | 1.0	0.0 | 1.0	0.0 | 1.0	0.0 | 1.0	0.0 | 1.0	0.0 | 1.0	0.0 | 1.0	0.001 | 1.0	0.0 | 1.0	0.0 | 1.0	0.0 | 1.0	0.0 | 1.0	0.0 | 1.0	0.0 | 1.0	0.0 | 1.0
FGF1_FGFR3	CPI-SS015819E65	simple:P05230	simple:P22607	ENSG00000113578	ENSG00000068078	IntAct	TRUE	FALSE	0.005 | 1.0	0.007 | 1.0	0.0 | 1.0	0.0 | 1.0	0.0 | 1.0	0.011 | 1.0	0.01 | 1.0	0.0 | 1.0	0.0 | 1.0	0.008 | 1.0	0.006 | 1.0	0.008 | 1.0	0.01 | 1.0	0.0 | 1.0	0.0 | 1.0	0.0 | 1.0	0.006 | 1.0	0.005 | 1.0	0.006 | 1.0	0.008 | 1.0	0.0 | 1.0	0.0 | 1.0	0.0 | 1.0	0.003 | 1.0	0.002 | 1.0
FGF8_FGFR3	CPI-SS0CFABB69A	simple:P55075	simple:P22607	ENSG00000107831	ENSG00000068078	InnateDB-All	TRUE	FALSE	0.002 | 1.0	0.005 | 1.0	0.0 | 1.0	0.0 | 1.0	0.0 | 1.0	0.0 | 1.0	0.0 | 1.0	0.0 | 1.0	0.0 | 1.0	0.002 | 1.0	0.001 | 1.0	0.0 | 1.0	0.0 | 1.0	0.0 | 1.0	0.0 | 1.0	0.0 | 1.0	0.0 | 1.0	0.0 | 1.0	0.004 | 1.0	0.006 | 1.0	0.0 | 1.0	0.0 | 1.0	0.0 | 1.0	0.0 | 1.0	0.0 | 1.0
FGF9_FGFR3	CPI-SS05D62446A	simple:P31371	simple:P22607	ENSG00000102678	ENSG00000068078	InnateDB-All	TRUE	FALSE	0.01 | 1.0	0.012 | 1.0	0.0 | 1.0	0.0 | 1.0	0.0 | 1.0	0.012 | 1.0	0.011 | 1.0	0.0 | 1.0	0.0 | 1.0	0.718 | 1.0	0.717 | 1.0	0.444 | 1.0	0.446 | 1.0	0.0 | 1.0	0.0 | 1.0	0.0 | 1.0	0.012 | 1.0	0.011 | 1.0	0.006 | 1.0	0.008 | 1.0	0.0 | 1.0	0.0 | 1.0	0.0 | 1.0	0.009 | 1.0	0.008 | 1.0
FGFR2_FGFR3	CPI-SS0BF3ED143	simple:P21802	simple:P22607	ENSG00000066468	ENSG00000068078	InnateDB-All	TRUE	FALSE	0.743 | 1.0	0.746 | 1.0	0.0 | 1.0	0.0 | 1.0	0.0 | 1.0	0.114 | 1.0	0.113 | 1.0	0.0 | 1.0	0.0 | 1.0	0.345 | 1.0	0.344 | 1.0	0.178 | 1.0	0.18 | 1.0	0.0 | 1.0	0.0 | 1.0	0.0 | 1.0	0.135 | 1.0	0.134 | 1.0	0.092 | 1.0	0.095 | 1.0	0.0 | 1.0	0.0 | 1.0	0.0 | 1.0	0.071 | 1.0	0.07 | 1.0
RIPK1_TNFSF10	CPI-SS028A6D527	simple:Q13546	simple:P50591	ENSG00000137275	ENSG00000121858	InnateDB-All	TRUE	FALSE	0.054 | 1.0	0.061 | 1.0	0.054 | 1.0	0.038 | 1.0	0.068 | 1.0	0.038 | 1.0	0.04 | 1.0	0.047 | 1.0	0.077 | 1.0	0.046 | 1.0	0.049 | 1.0	0.047 | 1.0	0.054 | 1.0	0.047 | 1.0	0.065 | 1.0	0.096 | 1.0	0.065 | 1.0	0.068 | 1.0	0.077 | 1.0	0.083 | 1.0	0.076 | 1.0	0.046 | 1.0	0.076 | 1.0	0.046 | 1.0	0.048 | 1.0
TNFRSF10C_TNFSF10	CPI-SS01ECFDA18	simple:O14798	simple:P50591	ENSG00000173535	ENSG00000121858	curated	TRUE	FALSE	0.066 | 1.0	0.073 | 1.0	0.066 | 1.0	0.041 | 1.0	0.072 | 1.0	0.041 | 1.0	0.044 | 1.0	0.139 | 1.0	0.17 | 1.0	0.139 | 1.0	0.142 | 1.0	0.101 | 1.0	0.108 | 1.0	0.101 | 1.0	0.027 | 1.0	0.057 | 1.0	0.027 | 1.0	0.029 | 1.0	0.04 | 1.0	0.047 | 1.0	0.04 | 1.0	0.03 | 1.0	0.061 | 1.0	0.03 | 1.0	0.033 | 1.0
FGFR3_FGF2	CPI-SS06B649B31	simple:P22607	simple:P09038	ENSG00000068078	ENSG00000138685	curated	TRUE	FALSE	0.002 | 1.0	0.004 | 1.0	0.005 | 1.0	0.0 | 1.0	0.0 | 1.0	0.0 | 1.0	0.0 | 1.0	0.0 | 1.0	0.0 | 1.0	0.0 | 1.0	0.0 | 1.0	0.005 | 1.0	0.006 | 1.0	0.007 | 1.0	0.003 | 1.0	0.004 | 1.0	0.002 | 1.0	0.002 | 1.0	0.0 | 1.0	0.0 | 1.0	0.0 | 1.0	0.002 | 1.0	0.003 | 1.0	0.001 | 1.0	0.001 | 1.0
FGFR3_FGF5	CPI-SS05B7C1DB1	simple:P22607	simple:P12034	ENSG00000068078	ENSG00000138675	InnateDB-All	TRUE	FALSE	0.0 | 1.0	0.0 | 1.0	0.004 | 1.0	0.0 | 1.0	0.0 | 1.0	0.0 | 1.0	0.0 | 1.0	0.0 | 1.0	0.0 | 1.0	0.0 | 1.0	0.0 | 1.0	0.0 | 1.0	0.0 | 1.0	0.006 | 1.0	0.002 | 1.0	0.0 | 1.0	0.0 | 1.0	0.002 | 1.0	0.0 | 1.0	0.0 | 1.0	0.0 | 1.0	0.001 | 1.0	0.0 | 1.0	0.0 | 1.0	0.001 | 1.0
FGFR2_FGF5	CPI-SS08232DC7B	simple:P21802	simple:P12034	ENSG00000066468	ENSG00000138675	IntAct	TRUE	FALSE	0.0 | 1.0	0.0 | 1.0	0.744 | 1.0	0.113 | 1.0	0.0 | 1.0	0.0 | 1.0	0.113 | 1.0	0.344 | 1.0	0.0 | 1.0	0.0 | 1.0	0.344 | 1.0	0.0 | 1.0	0.0 | 1.0	0.178 | 1.0	0.134 | 1.0	0.0 | 1.0	0.0 | 1.0	0.134 | 1.0	0.0 | 1.0	0.0 | 1.0	0.093 | 1.0	0.07 | 1.0	0.0 | 1.0	0.0 | 1.0	0.07 | 1.0
FGFR1_FGF5	CPI-SS0E0BCE16F	simple:P11362	simple:P12034	ENSG00000077782	ENSG00000138675	InnateDB-All	TRUE	FALSE	0.0 | 1.0	0.0 | 1.0	0.008 | 1.0	0.001 | 1.0	0.0 | 1.0	0.0 | 1.0	0.001 | 1.0	0.002 | 1.0	0.0 | 1.0	0.0 | 1.0	0.002 | 1.0	0.0 | 1.0	0.0 | 1.0	0.006 | 1.0	0.002 | 1.0	0.0 | 1.0	0.0 | 1.0	0.002 | 1.0	0.0 | 1.0	0.0 | 1.0	0.005 | 1.0	0.001 | 1.0	0.0 | 1.0	0.0 | 1.0	0.001 | 1.0
FLG_FGF5	CPI-SS0E0BCE16F	simple:P11362	simple:P12034	ENSG00000143631	ENSG00000138675	InnateDB-All	TRUE	FALSE	0.0 | 1.0	0.0 | 1.0	0.0 | 1.0	0.0 | 1.0	0.0 | 1.0	0.0 | 1.0	0.0 | 1.0	0.0 | 1.0	0.0 | 1.0	0.0 | 1.0	0.0 | 1.0	0.0 | 1.0	0.0 | 1.0	0.0 | 1.0	0.0 | 1.0	0.0 | 1.0	0.0 | 1.0	0.0 | 1.0	0.0 | 1.0	0.0 | 1.0	0.0 | 1.0	0.001 | 1.0	0.0 | 1.0	0.0 | 1.0	0.001 | 1.0
FGFR3_FGF7	CPI-SS0E1FF5FD8	simple:P22607	simple:P21781	ENSG00000068078	ENSG00000140285	InnateDB-All	TRUE	FALSE	0.0 | 1.0	0.0 | 1.0	0.0 | 1.0	0.0 | 1.0	0.0 | 1.0	0.0 | 1.0	0.0 | 1.0	0.0 | 1.0	0.0 | 1.0	0.0 | 1.0	0.0 | 1.0	0.0 | 1.0	0.0 | 1.0	0.0 | 1.0	0.0 | 1.0	0.0 | 1.0	0.002 | 1.0	0.002 | 1.0	0.0 | 1.0	0.0 | 1.0	0.0 | 1.0	0.0 | 1.0	0.0 | 1.0	0.001 | 1.0	0.001 | 1.0
CD34_SELP	CPI-SS013E6EBC3	simple:P28906	simple:P16109	ENSG00000174059	ENSG00000174175	curated	FALSE	FALSE	0.002 | 1.0	0.003 | 1.0	0.0 | 1.0	0.0 | 1.0	0.004 | 1.0	0.004 | 1.0	0.003 | 1.0	0.0 | 1.0	0.0 | 1.0	0.0 | 1.0	0.0 | 1.0	0.0 | 1.0	0.0 | 1.0	0.0 | 1.0	0.0 | 1.0	0.004 | 1.0	0.003 | 1.0	0.003 | 1.0	0.0 | 1.0	0.0 | 1.0	0.0 | 1.0	0.0 | 1.0	0.004 | 1.0	0.003 | 1.0	0.003 | 1.0
CEACAM1_CD209	CPI-SS055B305F1	simple:P13688	simple:Q9NNX6	ENSG00000079385	ENSG00000090659	curated	TRUE	FALSE	0.02 | 1.0	0.017 | 1.0	0.015 | 1.0	0.009 | 1.0	0.008 | 1.0	0.01 | 1.0	0.008 | 1.0	0.017 | 1.0	0.016 | 1.0	0.019 | 1.0	0.016 | 1.0	0.036 | 1.0	0.033 | 1.0	0.031 | 1.0	0.011 | 1.0	0.01 | 1.0	0.013 | 1.0	0.011 | 1.0	0.012 | 1.0	0.009 | 1.0	0.007 | 1.0	0.01 | 1.0	0.008 | 1.0	0.011 | 1.0	0.009 | 1.0
CEACAM1_SELE	CPI-SS0BDC04683	simple:P13688	simple:P16581	ENSG00000079385	ENSG00000007908	curated	TRUE	FALSE	0.017 | 1.0	0.015 | 1.0	0.0 | 1.0	0.007 | 1.0	0.008 | 1.0	0.007 | 1.0	0.008 | 1.0	0.015 | 1.0	0.017 | 1.0	0.016 | 1.0	0.016 | 1.0	0.033 | 1.0	0.031 | 1.0	0.0 | 1.0	0.01 | 1.0	0.011 | 1.0	0.01 | 1.0	0.01 | 1.0	0.009 | 1.0	0.007 | 1.0	0.0 | 1.0	0.008 | 1.0	0.009 | 1.0	0.008 | 1.0	0.008 | 1.0
SELPLG_SELE	CPI-SS085C6A191	simple:Q14242	simple:P16581	ENSG00000110876	ENSG00000007908	curated	FALSE	FALSE	0.0 | 1.0	0.0 | 1.0	0.0 | 1.0	0.001 | 1.0	0.003 | 1.0	0.002 | 1.0	0.002 | 1.0	0.0 | 1.0	0.0 | 1.0	0.0 | 1.0	0.0 | 1.0	0.0 | 1.0	0.0 | 1.0	0.0 | 1.0	0.0 | 1.0	0.0 | 1.0	0.0 | 1.0	0.0 | 1.0	0.0 | 1.0	0.0 | 1.0	0.0 | 1.0	0.0 | 1.0	0.0 | 1.0	0.0 | 1.0	0.0 | 1.0
TNFSF13B_CD40	CPI-SS09332BB64	simple:Q9Y275	simple:P25942	ENSG00000102524	ENSG00000101017	InnateDB	TRUE	FALSE	0.004 | 1.0	0.0 | 1.0	0.0 | 1.0	0.003 | 1.0	0.002 | 1.0	0.002 | 1.0	0.003 | 1.0	0.003 | 1.0	0.002 | 1.0	0.001 | 1.0	0.003 | 1.0	0.005 | 1.0	0.0 | 1.0	0.0 | 1.0	0.007 | 1.0	0.006 | 1.0	0.006 | 1.0	0.007 | 1.0	0.013 | 1.0	0.0 | 1.0	0.0 | 1.0	0.002 | 1.0	0.001 | 1.0	0.001 | 1.0	0.003 | 1.0
CD40LG_CD40	CPI-SS0D9E45677	simple:P29965	simple:P25942	ENSG00000102245	ENSG00000101017	curated	TRUE	FALSE	0.005 | 1.0	0.0 | 1.0	0.0 | 1.0	0.005 | 1.0	0.004 | 1.0	0.004 | 1.0	0.006 | 1.0	0.004 | 1.0	0.003 | 1.0	0.003 | 1.0	0.005 | 1.0	0.005 | 1.0	0.0 | 1.0	0.0 | 1.0	0.005 | 1.0	0.004 | 1.0	0.004 | 1.0	0.005 | 1.0	0.004 | 1.0	0.0 | 1.0	0.0 | 1.0	0.003 | 1.0	0.002 | 1.0	0.001 | 1.0	0.003 | 1.0
TNFSF13B_TNFRSF13C	CPI-SS0247B3C14	simple:Q9Y275	simple:Q96RJ3	ENSG00000102524	ENSG00000159958	guidetopharmacology.org	TRUE	FALSE	0.009 | 1.0	0.0 | 1.0	0.002 | 1.0	0.005 | 1.0	0.004 | 1.0	0.003 | 1.0	0.002 | 1.0	0.005 | 1.0	0.004 | 1.0	0.003 | 1.0	0.002 | 1.0	0.01 | 1.0	0.0 | 1.0	0.003 | 1.0	0.009 | 1.0	0.008 | 1.0	0.007 | 1.0	0.006 | 1.0	0.017 | 1.0	0.0 | 1.0	0.01 | 1.0	0.005 | 1.0	0.003 | 1.0	0.003 | 1.0	0.002 | 1.0
TNFSF13B_TNFRSF17	CPI-SS018FE2F97	simple:Q9Y275	simple:Q02223	ENSG00000102524	ENSG00000048462	curated	TRUE	FALSE	0.002 | 1.0	0.0 | 1.0	0.002 | 1.0	0.0 | 1.0	0.002 | 1.0	0.0 | 1.0	0.0 | 1.0	0.0 | 1.0	0.002 | 1.0	0.0 | 1.0	0.0 | 1.0	0.003 | 1.0	0.0 | 1.0	0.003 | 1.0	0.0 | 1.0	0.006 | 1.0	0.0 | 1.0	0.0 | 1.0	0.01 | 1.0	0.0 | 1.0	0.01 | 1.0	0.0 | 1.0	0.001 | 1.0	0.0 | 1.0	0.0 | 1.0
TNFSF13_TNFRSF17	CPI-SS0B89DD8C1	simple:O75888	simple:Q02223	ENSG00000161955	ENSG00000048462	curated	TRUE	FALSE	0.01 | 1.0	0.0 | 1.0	0.01 | 1.0	0.0 | 1.0	0.03 | 1.0	0.0 | 1.0	0.0 | 1.0	0.0 | 1.0	0.064 | 1.0	0.0 | 1.0	0.0 | 1.0	0.055 | 1.0	0.0 | 1.0	0.055 | 1.0	0.0 | 1.0	0.014 | 1.0	0.0 | 1.0	0.0 | 1.0	0.014 | 1.0	0.0 | 1.0	0.014 | 1.0	0.0 | 1.0	0.037 | 1.0	0.0 | 1.0	0.0 | 1.0
TNFSF13B_TNFRSF13B	CPI-SS07FEEF0C3	simple:Q9Y275	simple:O14836	ENSG00000102524	ENSG00000240505	curated	TRUE	FALSE	0.002 | 1.0	0.0 | 1.0	0.0 | 1.0	0.001 | 1.0	0.002 | 1.0	0.002 | 1.0	0.0 | 1.0	0.001 | 1.0	0.002 | 1.0	0.002 | 1.0	0.0 | 1.0	0.003 | 1.0	0.0 | 1.0	0.0 | 1.0	0.005 | 1.0	0.006 | 1.0	0.006 | 1.0	0.0 | 1.0	0.01 | 1.0	0.0 | 1.0	0.0 | 1.0	0.001 | 1.0	0.001 | 1.0	0.002 | 1.0	0.0 | 1.0
TNFSF13_TNFRSF13B	CPI-SS06BA9088E	simple:O75888	simple:O14836	ENSG00000161955	ENSG00000240505	curated	TRUE	FALSE	0.01 | 1.0	0.0 | 1.0	0.0 | 1.0	0.03 | 1.0	0.03 | 1.0	0.031 | 1.0	0.0 | 1.0	0.064 | 1.0	0.064 | 1.0	0.065 | 1.0	0.0 | 1.0	0.054 | 1.0	0.0 | 1.0	0.0 | 1.0	0.014 | 1.0	0.014 | 1.0	0.015 | 1.0	0.0 | 1.0	0.013 | 1.0	0.0 | 1.0	0.0 | 1.0	0.037 | 1.0	0.037 | 1.0	0.038 | 1.0	0.0 | 1.0
LTA_TNFRSF1A	CPI-SS084BE3E4B	simple:P01374	simple:P19438	ENSG00000226979	ENSG00000067182	curated	TRUE	FALSE	0.067 | 1.0	0.027 | 1.0	0.1 | 1.0	0.116 | 1.0	0.052 | 1.0	0.128 | 1.0	0.07 | 1.0	0.115 | 1.0	0.052 | 1.0	0.128 | 1.0	0.07 | 1.0	0.0 | 1.0	0.0 | 1.0	0.0 | 1.0	0.0 | 1.0	0.0 | 1.0	0.0 | 1.0	0.0 | 1.0	0.0 | 1.0	0.0 | 1.0	0.0 | 1.0	0.115 | 1.0	0.052 | 1.0	0.128 | 1.0	0.07 | 1.0
GRN_TNFRSF1A	CPI-SS0A8258F88	simple:P28799	simple:P19438	ENSG00000030582	ENSG00000067182	MINT	TRUE	FALSE	0.228 | 1.0	0.187 | 1.0	0.261 | 0.96	0.309 | 0.088	0.245 | 1.0	0.321 | 0.024	0.263 | 0.988	0.401 | 0.0	0.337 | 1.0	0.413 | 0.0	0.355 | 0.0	0.348 | 1.0	0.307 | 1.0	0.38 | 0.004	0.29 | 0.507	0.227 | 1.0	0.303 | 0.243	0.245 | 1.0	0.255 | 1.0	0.214 | 1.0	0.287 | 0.547	0.335 | 0.0	0.271 | 1.0	0.347 | 0.0	0.289 | 0.541
LTA_RIPK1	CPI-SS0D5C54214	simple:P01374	simple:Q13546	ENSG00000226979	ENSG00000137275	MINT	TRUE	FALSE	0.052 | 1.0	0.045 | 1.0	0.075 | 1.0	0.038 | 1.0	0.047 | 1.0	0.065 | 1.0	0.046 | 1.0	0.038 | 1.0	0.046 | 1.0	0.065 | 1.0	0.046 | 1.0	0.0 | 1.0	0.0 | 1.0	0.0 | 1.0	0.0 | 1.0	0.0 | 1.0	0.0 | 1.0	0.0 | 1.0	0.0 | 1.0	0.0 | 1.0	0.0 | 1.0	0.038 | 1.0	0.046 | 1.0	0.065 | 1.0	0.046 | 1.0
LTA_TNFRSF1B	CPI-SS07D9A48A2	simple:P01374	simple:P20333	ENSG00000226979	ENSG00000028137	curated	TRUE	FALSE	0.003 | 1.0	0.006 | 1.0	0.005 | 1.0	0.002 | 1.0	0.012 | 1.0	0.004 | 1.0	0.001 | 1.0	0.002 | 1.0	0.011 | 1.0	0.004 | 1.0	0.001 | 1.0	0.0 | 1.0	0.0 | 1.0	0.0 | 1.0	0.0 | 1.0	0.0 | 1.0	0.0 | 1.0	0.0 | 1.0	0.0 | 1.0	0.0 | 1.0	0.0 | 1.0	0.002 | 1.0	0.011 | 1.0	0.004 | 1.0	0.001 | 1.0
GRN_TNFRSF1B	CPI-SS03B9E01A2	simple:P28799	simple:P20333	ENSG00000030582	ENSG00000028137	MINT	TRUE	FALSE	0.164 | 1.0	0.167 | 1.0	0.166 | 1.0	0.195 | 1.0	0.205 | 1.0	0.197 | 1.0	0.195 | 1.0	0.287 | 1.0	0.297 | 1.0	0.289 | 1.0	0.287 | 1.0	0.283 | 1.0	0.286 | 1.0	0.285 | 1.0	0.177 | 1.0	0.186 | 1.0	0.179 | 1.0	0.176 | 1.0	0.19 | 1.0	0.193 | 1.0	0.192 | 1.0	0.221 | 1.0	0.231 | 1.0	0.223 | 1.0	0.22 | 1.0
TNFSF14_LTBR	CPI-SS0859C173B	simple:O43557	simple:P36941	ENSG00000125735	ENSG00000111321	curated	TRUE	FALSE	0.089 | 1.0	0.081 | 1.0	0.061 | 1.0	0.121 | 1.0	0.125 | 1.0	0.077 | 1.0	0.089 | 1.0	0.122 | 1.0	0.126 | 1.0	0.078 | 1.0	0.09 | 1.0	0.0 | 1.0	0.0 | 1.0	0.0 | 1.0	0.0 | 1.0	0.0 | 1.0	0.0 | 1.0	0.0 | 1.0	0.0 | 1.0	0.0 | 1.0	0.0 | 1.0	0.0 | 1.0	0.0 | 1.0	0.0 | 1.0	0.0 | 1.0
LTA_TNFRSF14	CPI-SS0110361CB	simple:P01374	simple:Q92956	ENSG00000226979	ENSG00000157873	curated	TRUE	FALSE	0.003 | 1.0	0.006 | 1.0	0.003 | 1.0	0.002 | 1.0	0.003 | 1.0	0.002 | 1.0	0.003 | 1.0	0.002 | 1.0	0.003 | 1.0	0.002 | 1.0	0.003 | 1.0	0.0 | 1.0	0.0 | 1.0	0.0 | 1.0	0.0 | 1.0	0.0 | 1.0	0.0 | 1.0	0.0 | 1.0	0.0 | 1.0	0.0 | 1.0	0.0 | 1.0	0.002 | 1.0	0.003 | 1.0	0.002 | 1.0	0.003 | 1.0
TNFSF13_TNFRSF14	CPI-SS0C28FEC7D	simple:O75888	simple:Q92956	ENSG00000161955	ENSG00000157873	InnateDB-All	TRUE	FALSE	0.011 | 1.0	0.013 | 1.0	0.01 | 1.0	0.03 | 1.0	0.032 | 1.0	0.031 | 1.0	0.032 | 1.0	0.064 | 1.0	0.065 | 1.0	0.065 | 1.0	0.065 | 1.0	0.056 | 1.0	0.058 | 1.0	0.055 | 1.0	0.015 | 1.0	0.016 | 1.0	0.015 | 1.0	0.016 | 1.0	0.014 | 1.0	0.017 | 1.0	0.014 | 1.0	0.037 | 1.0	0.038 | 1.0	0.038 | 1.0	0.038 | 1.0
MIF_TNFRSF14	CPI-SS02ACCF1F7	simple:P14174	simple:Q92956	ENSG00000240972	ENSG00000157873	IntAct	TRUE	FALSE	0.004 | 1.0	0.007 | 1.0	0.004 | 1.0	0.004 | 1.0	0.005 | 1.0	0.004 | 1.0	0.005 | 1.0	0.014 | 1.0	0.015 | 1.0	0.014 | 1.0	0.015 | 1.0	0.0 | 1.0	0.0 | 1.0	0.0 | 1.0	0.003 | 1.0	0.004 | 1.0	0.004 | 1.0	0.004 | 1.0	0.003 | 1.0	0.005 | 1.0	0.002 | 1.0	0.003 | 1.0	0.005 | 1.0	0.004 | 1.0	0.005 | 1.0
BTLA_TNFRSF14	CPI-SS08330207B	simple:Q7Z6A9	simple:Q92956	ENSG00000186265	ENSG00000157873	guidetopharmacology.org	FALSE	FALSE	0.002 | 1.0	0.005 | 1.0	0.002 | 1.0	0.001 | 1.0	0.003 | 1.0	0.002 | 1.0	0.003 | 1.0	0.0 | 1.0	0.0 | 1.0	0.0 | 1.0	0.0 | 1.0	0.0 | 1.0	0.0 | 1.0	0.0 | 1.0	0.002 | 1.0	0.003 | 1.0	0.002 | 1.0	0.003 | 1.0	0.0 | 1.0	0.0 | 1.0	0.0 | 1.0	0.0 | 1.0	0.0 | 1.0	0.0 | 1.0	0.0 | 1.0
TNFSF14_TNFRSF14	CPI-SS019C98396	simple:O43557	simple:Q92956	ENSG00000125735	ENSG00000157873	guidetopharmacology.org	TRUE	FALSE	0.002 | 1.0	0.005 | 1.0	0.002 | 1.0	0.001 | 1.0	0.003 | 1.0	0.002 | 1.0	0.003 | 1.0	0.002 | 1.0	0.004 | 1.0	0.003 | 1.0	0.004 | 1.0	0.0 | 1.0	0.0 | 1.0	0.0 | 1.0	0.0 | 1.0	0.0 | 1.0	0.0 | 1.0	0.0 | 1.0	0.0 | 1.0	0.0 | 1.0	0.0 | 1.0	0.0 | 1.0	0.0 | 1.0	0.0 | 1.0	0.0 | 1.0
NTF3_NGFR	CPI-SS0AEAEEECB	simple:P20783	simple:P08138	ENSG00000185652	ENSG00000064300	curated	TRUE	FALSE	0.219 | 1.0	0.01 | 1.0	0.117 | 1.0	0.03 | 1.0	0.015 | 1.0	0.089 | 1.0	0.037 | 1.0	0.023 | 1.0	0.008 | 1.0	0.082 | 1.0	0.03 | 1.0	0.219 | 1.0	0.01 | 1.0	0.118 | 1.0	0.031 | 1.0	0.015 | 1.0	0.09 | 1.0	0.038 | 1.0	0.223 | 1.0	0.014 | 1.0	0.121 | 1.0	0.027 | 1.0	0.011 | 1.0	0.085 | 1.0	0.034 | 1.0
NGF_NGFR	CPI-SS0EDD4928A	simple:P01138	simple:P08138	ENSG00000134259	ENSG00000064300	curated	TRUE	FALSE	0.253 | 1.0	0.044 | 1.0	0.151 | 1.0	0.031 | 1.0	0.015 | 1.0	0.089 | 1.0	0.038 | 1.0	0.024 | 1.0	0.008 | 1.0	0.083 | 1.0	0.031 | 1.0	0.222 | 1.0	0.012 | 1.0	0.12 | 1.0	0.041 | 1.0	0.025 | 1.0	0.1 | 1.0	0.048 | 1.0	0.245 | 1.0	0.035 | 1.0	0.143 | 1.0	0.032 | 1.0	0.016 | 1.0	0.09 | 1.0	0.039 | 1.0
NTF4_NGFR	CPI-SS0AA76E0E4	simple:P34130	simple:P08138	ENSG00000225950	ENSG00000064300	curated	TRUE	FALSE	0.223 | 1.0	0.014 | 1.0	0.122 | 1.0	0.026 | 1.0	0.01 | 1.0	0.085 | 1.0	0.033 | 1.0	0.022 | 1.0	0.007 | 1.0	0.081 | 1.0	0.03 | 1.0	0.0 | 1.0	0.0 | 1.0	0.0 | 1.0	0.023 | 1.0	0.007 | 1.0	0.082 | 1.0	0.03 | 1.0	0.222 | 1.0	0.012 | 1.0	0.12 | 1.0	0.022 | 1.0	0.006 | 1.0	0.081 | 1.0	0.029 | 1.0
BDNF_NGFR	CPI-SS0E4E83C2E	simple:P23560	simple:P08138	ENSG00000176697	ENSG00000064300	curated	TRUE	FALSE	0.221 | 1.0	0.012 | 1.0	0.12 | 1.0	0.022 | 1.0	0.006 | 1.0	0.081 | 1.0	0.029 | 1.0	0.026 | 1.0	0.01 | 1.0	0.084 | 1.0	0.033 | 1.0	0.222 | 1.0	0.012 | 1.0	0.12 | 1.0	0.035 | 1.0	0.02 | 1.0	0.094 | 1.0	0.043 | 1.0	0.235 | 1.0	0.026 | 1.0	0.134 | 1.0	0.027 | 1.0	0.012 | 1.0	0.086 | 1.0	0.035 | 1.0
NTF3_NTRK3	CPI-SS05162C56B	simple:P20783	simple:Q16288	ENSG00000185652	ENSG00000140538	curated	TRUE	FALSE	0.005 | 1.0	0.006 | 1.0	0.018 | 1.0	0.012 | 1.0	0.015 | 1.0	0.019 | 1.0	0.014 | 1.0	0.005 | 1.0	0.008 | 1.0	0.012 | 1.0	0.007 | 1.0	0.006 | 1.0	0.006 | 1.0	0.019 | 1.0	0.012 | 1.0	0.016 | 1.0	0.02 | 1.0	0.015 | 1.0	0.009 | 1.0	0.009 | 1.0	0.022 | 1.0	0.008 | 1.0	0.012 | 1.0	0.016 | 1.0	0.011 | 1.0
NGF_NTRK1	CPI-SS052127A00	simple:P01138	simple:P04629	ENSG00000134259	ENSG00000198400	curated	TRUE	FALSE	0.042 | 1.0	0.039 | 1.0	0.036 | 1.0	0.012 | 1.0	0.015 | 1.0	0.012 | 1.0	0.013 | 1.0	0.005 | 1.0	0.008 | 1.0	0.005 | 1.0	0.006 | 1.0	0.011 | 1.0	0.008 | 1.0	0.005 | 1.0	0.022 | 1.0	0.025 | 1.0	0.022 | 1.0	0.023 | 1.0	0.034 | 1.0	0.031 | 1.0	0.028 | 1.0	0.013 | 1.0	0.016 | 1.0	0.013 | 1.0	0.014 | 1.0
BDNF_NTRK2	CPI-SS0BA601DC4	simple:P23560	simple:Q16620	ENSG00000176697	ENSG00000148053	curated	TRUE	FALSE	0.407 | 1.0	0.058 | 1.0	0.586 | 1.0	0.7 | 1.0	0.082 | 1.0	0.649 | 1.0	0.425 | 1.0	0.704 | 1.0	0.086 | 1.0	0.653 | 1.0	0.428 | 1.0	0.407 | 1.0	0.058 | 1.0	0.587 | 1.0	0.713 | 1.0	0.096 | 1.0	0.663 | 1.0	0.438 | 1.0	0.42 | 1.0	0.072 | 1.0	0.6 | 1.0	0.705 | 1.0	0.088 | 1.0	0.655 | 1.0	0.43 | 1.0
BDNF_SORT1	CPI-SS09A36B221	simple:P23560	simple:Q99523	ENSG00000176697	ENSG00000134243	InnateDB-All	TRUE	FALSE	0.031 | 1.0	0.203 | 1.0	0.039 | 1.0	0.013 | 1.0	0.247 | 1.0	0.022 | 1.0	0.016 | 1.0	0.016 | 1.0	0.25 | 1.0	0.025 | 1.0	0.02 | 1.0	0.031 | 1.0	0.203 | 1.0	0.04 | 1.0	0.026 | 1.0	0.26 | 1.0	0.035 | 1.0	0.03 | 1.0	0.045 | 1.0	0.217 | 1.0	0.053 | 1.0	0.018 | 1.0	0.252 | 1.0	0.027 | 1.0	0.022 | 1.0
JAG1_NOTCH1	CPI-SS052ADA696	simple:P78504	simple:P46531	ENSG00000101384	ENSG00000148400	curated	FALSE	FALSE	0.036 | 1.0	0.126 | 1.0	0.071 | 1.0	0.125 | 1.0	0.184 | 1.0	0.116 | 1.0	0.101 | 1.0	0.156 | 0.0	0.215 | 0.0	0.146 | 1.0	0.132 | 1.0	0.107 | 1.0	0.197 | 0.0	0.141 | 0.044	0.114 | 1.0	0.173 | 1.0	0.104 | 1.0	0.09 | 1.0	0.066 | 1.0	0.157 | 1.0	0.101 | 1.0	0.122 | 1.0	0.181 | 1.0	0.113 | 1.0	0.098 | 1.0
NOV_NOTCH1	CPI-SS0C700EC0B	simple:P48745	simple:P46531	ENSG00000136999	ENSG00000148400	InnateDB-All	TRUE	FALSE	0.034 | 1.0	0.125 | 1.0	0.069 | 1.0	0.08 | 1.0	0.138 | 1.0	0.07 | 1.0	0.055 | 1.0	0.095 | 1.0	0.154 | 1.0	0.085 | 1.0	0.071 | 1.0	0.044 | 1.0	0.135 | 1.0	0.079 | 1.0	0.157 | 1.0	0.216 | 1.0	0.147 | 1.0	0.133 | 1.0	0.181 | 1.0	0.272 | 0.0	0.216 | 0.0	0.075 | 1.0	0.134 | 1.0	0.065 | 1.0	0.051 | 1.0
DLL1_NOTCH1	CPI-SS04A5D6B6F	simple:O00548	simple:P46531	ENSG00000198719	ENSG00000148400	curated	FALSE	FALSE	0.03 | 1.0	0.121 | 1.0	0.065 | 1.0	0.077 | 1.0	0.136 | 1.0	0.067 | 1.0	0.053 | 1.0	0.075 | 1.0	0.134 | 1.0	0.065 | 1.0	0.051 | 1.0	0.0 | 1.0	0.0 | 1.0	0.0 | 1.0	0.073 | 1.0	0.132 | 1.0	0.063 | 1.0	0.049 | 1.0	0.029 | 1.0	0.119 | 1.0	0.064 | 1.0	0.074 | 1.0	0.133 | 1.0	0.064 | 1.0	0.05 | 1.0
INSL6_NOTCH1	CPI-SS027CDC2CA	simple:Q9Y581	simple:P46531	ENSG00000120210	ENSG00000148400	InnateDB-All	TRUE	FALSE	0.0 | 1.0	0.0 | 1.0	0.0 | 1.0	0.073 | 1.0	0.131 | 1.0	0.063 | 1.0	0.048 | 1.0	0.0 | 1.0	0.0 | 1.0	0.0 | 1.0	0.0 | 1.0	0.0 | 1.0	0.0 | 1.0	0.0 | 1.0	0.073 | 1.0	0.132 | 1.0	0.063 | 1.0	0.049 | 1.0	0.0 | 1.0	0.0 | 1.0	0.0 | 1.0	0.073 | 1.0	0.131 | 1.0	0.063 | 1.0	0.048 | 1.0
RIF1_NOTCH1	CPI-SS027CDC2CA	simple:Q9Y581	simple:P46531	ENSG00000080345	ENSG00000148400	InnateDB-All	TRUE	FALSE	0.058 | 1.0	0.149 | 1.0	0.093 | 1.0	0.095 | 1.0	0.154 | 1.0	0.085 | 1.0	0.071 | 1.0	0.122 | 1.0	0.18 | 1.0	0.112 | 1.0	0.097 | 1.0	0.065 | 1.0	0.156 | 1.0	0.1 | 1.0	0.095 | 1.0	0.154 | 1.0	0.085 | 1.0	0.071 | 1.0	0.037 | 1.0	0.128 | 1.0	0.072 | 1.0	0.087 | 1.0	0.145 | 1.0	0.077 | 1.0	0.062 | 1.0
DLK1_NOTCH1	CPI-SS0FC612D4D	simple:P80370	simple:P46531	ENSG00000185559	ENSG00000148400	curated	FALSE	FALSE	0.029 | 1.0	0.119 | 1.0	0.064 | 1.0	0.073 | 1.0	0.131 | 1.0	0.063 | 1.0	0.048 | 1.0	0.0 | 1.0	0.0 | 1.0	0.0 | 1.0	0.0 | 1.0	0.0 | 1.0	0.0 | 1.0	0.0 | 1.0	0.077 | 1.0	0.135 | 1.0	0.067 | 1.0	0.052 | 1.0	0.052 | 1.0	0.142 | 1.0	0.087 | 1.0	0.073 | 1.0	0.132 | 1.0	0.064 | 1.0	0.049 | 1.0
JAG2_NOTCH1	CPI-SS0DB3F5A37	simple:Q9Y219	simple:P46531	ENSG00000184916	ENSG00000148400	curated	FALSE	FALSE	0.031 | 1.0	0.122 | 1.0	0.066 | 1.0	0.074 | 1.0	0.133 | 1.0	0.064 | 1.0	0.05 | 1.0	0.081 | 1.0	0.14 | 1.0	0.072 | 1.0	0.057 | 1.0	0.03 | 1.0	0.12 | 1.0	0.065 | 1.0	0.075 | 1.0	0.134 | 1.0	0.065 | 1.0	0.051 | 1.0	0.029 | 1.0	0.119 | 1.0	0.064 | 1.0	0.073 | 1.0	0.132 | 1.0	0.064 | 1.0	0.049 | 1.0
DLL3_NOTCH1	CPI-SS0E5A6ADB3	simple:Q9NYJ7	simple:P46531	ENSG00000090932	ENSG00000148400	curated	FALSE	FALSE	0.03 | 1.0	0.12 | 1.0	0.065 | 1.0	0.075 | 1.0	0.133 | 1.0	0.065 | 1.0	0.05 | 1.0	0.0 | 1.0	0.0 | 1.0	0.0 | 1.0	0.0 | 1.0	0.03 | 1.0	0.12 | 1.0	0.065 | 1.0	0.073 | 1.0	0.132 | 1.0	0.063 | 1.0	0.049 | 1.0	0.03 | 1.0	0.12 | 1.0	0.065 | 1.0	0.075 | 1.0	0.133 | 1.0	0.065 | 1.0	0.05 | 1.0
DLL4_NOTCH1	CPI-SS0AFCA0602	simple:Q9NR61	simple:P46531	ENSG00000128917	ENSG00000148400	curated	FALSE	FALSE	0.031 | 1.0	0.122 | 1.0	0.066 | 1.0	0.098 | 1.0	0.157 | 1.0	0.089 | 1.0	0.074 | 1.0	0.077 | 1.0	0.135 | 1.0	0.067 | 1.0	0.053 | 1.0	0.032 | 1.0	0.122 | 1.0	0.067 | 1.0	0.074 | 1.0	0.133 | 1.0	0.065 | 1.0	0.05 | 1.0	0.03 | 1.0	0.12 | 1.0	0.065 | 1.0	0.084 | 1.0	0.143 | 1.0	0.075 | 1.0	0.06 | 1.0
JAG1_NOTCH3	CPI-SS0B99F22A2	simple:P78504	simple:Q9UM47	ENSG00000101384	ENSG00000074181	curated	FALSE	FALSE	0.014 | 1.0	0.012 | 1.0	0.009 | 1.0	0.056 | 1.0	0.055 | 1.0	0.057 | 1.0	0.055 | 1.0	0.087 | 1.0	0.085 | 1.0	0.087 | 1.0	0.086 | 1.0	0.085 | 1.0	0.083 | 1.0	0.08 | 1.0	0.045 | 1.0	0.043 | 1.0	0.045 | 1.0	0.044 | 1.0	0.045 | 1.0	0.043 | 1.0	0.04 | 1.0	0.054 | 1.0	0.052 | 1.0	0.054 | 1.0	0.052 | 1.0
DLL1_NOTCH3	CPI-SS047232C64	simple:O00548	simple:Q9UM47	ENSG00000198719	ENSG00000074181	curated	FALSE	FALSE	0.009 | 1.0	0.007 | 1.0	0.004 | 1.0	0.008 | 1.0	0.006 | 1.0	0.008 | 1.0	0.007 | 1.0	0.006 | 1.0	0.005 | 1.0	0.007 | 1.0	0.005 | 1.0	0.0 | 1.0	0.0 | 1.0	0.0 | 1.0	0.004 | 1.0	0.002 | 1.0	0.004 | 1.0	0.003 | 1.0	0.007 | 1.0	0.005 | 1.0	0.002 | 1.0	0.005 | 1.0	0.003 | 1.0	0.005 | 1.0	0.004 | 1.0
DLK1_NOTCH3	CPI-SS007AA9FDE	simple:P80370	simple:Q9UM47	ENSG00000185559	ENSG00000074181	curated	FALSE	FALSE	0.007 | 1.0	0.005 | 1.0	0.002 | 1.0	0.004 | 1.0	0.002 | 1.0	0.004 | 1.0	0.002 | 1.0	0.0 | 1.0	0.0 | 1.0	0.0 | 1.0	0.0 | 1.0	0.0 | 1.0	0.0 | 1.0	0.0 | 1.0	0.008 | 1.0	0.006 | 1.0	0.008 | 1.0	0.006 | 1.0	0.03 | 1.0	0.028 | 1.0	0.025 | 1.0	0.004 | 1.0	0.003 | 1.0	0.005 | 1.0	0.003 | 1.0
JAG2_NOTCH3	CPI-SS0263EFDDF	simple:Q9Y219	simple:Q9UM47	ENSG00000184916	ENSG00000074181	curated	FALSE	FALSE	0.009 | 1.0	0.007 | 1.0	0.004 | 1.0	0.005 | 1.0	0.003 | 1.0	0.005 | 1.0	0.004 | 1.0	0.012 | 1.0	0.011 | 1.0	0.013 | 1.0	0.011 | 1.0	0.008 | 1.0	0.006 | 1.0	0.003 | 1.0	0.006 | 1.0	0.004 | 1.0	0.006 | 1.0	0.005 | 1.0	0.007 | 1.0	0.005 | 1.0	0.002 | 1.0	0.004 | 1.0	0.003 | 1.0	0.005 | 1.0	0.003 | 1.0
DLL3_NOTCH3	CPI-SS035E5A708	simple:Q9NYJ7	simple:Q9UM47	ENSG00000090932	ENSG00000074181	curated	FALSE	FALSE	0.008 | 1.0	0.006 | 1.0	0.003 | 1.0	0.006 | 1.0	0.004 | 1.0	0.006 | 1.0	0.004 | 1.0	0.0 | 1.0	0.0 | 1.0	0.0 | 1.0	0.0 | 1.0	0.008 | 1.0	0.006 | 1.0	0.003 | 1.0	0.004 | 1.0	0.002 | 1.0	0.004 | 1.0	0.003 | 1.0	0.008 | 1.0	0.006 | 1.0	0.003 | 1.0	0.006 | 1.0	0.004 | 1.0	0.006 | 1.0	0.004 | 1.0
DLL4_NOTCH3	CPI-SS0938C6980	simple:Q9NR61	simple:Q9UM47	ENSG00000128917	ENSG00000074181	curated	FALSE	FALSE	0.009 | 1.0	0.007 | 1.0	0.004 | 1.0	0.029 | 1.0	0.028 | 1.0	0.03 | 1.0	0.028 | 1.0	0.008 | 1.0	0.006 | 1.0	0.008 | 1.0	0.006 | 1.0	0.01 | 1.0	0.008 | 1.0	0.005 | 1.0	0.005 | 1.0	0.004 | 1.0	0.006 | 1.0	0.004 | 1.0	0.008 | 1.0	0.006 | 1.0	0.003 | 1.0	0.015 | 1.0	0.014 | 1.0	0.016 | 1.0	0.014 | 1.0
JAG1_CD46	CPI-SS015B87133	simple:P78504	simple:P15529	ENSG00000101384	ENSG00000117335	curated	FALSE	FALSE	0.01 | 1.0	0.014 | 1.0	0.009 | 1.0	0.054 | 1.0	0.054 | 1.0	0.0 | 1.0	0.055 | 1.0	0.085 | 1.0	0.084 | 1.0	0.0 | 1.0	0.085 | 1.0	0.08 | 1.0	0.085 | 1.0	0.08 | 1.0	0.043 | 1.0	0.042 | 1.0	0.0 | 1.0	0.043 | 1.0	0.04 | 1.0	0.045 | 1.0	0.04 | 1.0	0.051 | 1.0	0.051 | 1.0	0.0 | 1.0	0.052 | 1.0
JAG1_NOTCH2	CPI-SS060B82BBC	simple:P78504	simple:Q04721	ENSG00000101384	ENSG00000134250	curated	FALSE	FALSE	0.011 | 1.0	0.01 | 1.0	0.009 | 1.0	0.054 | 1.0	0.057 | 1.0	0.055 | 1.0	0.054 | 1.0	0.085 | 1.0	0.088 | 1.0	0.085 | 1.0	0.085 | 1.0	0.082 | 1.0	0.081 | 1.0	0.08 | 1.0	0.043 | 1.0	0.045 | 1.0	0.043 | 1.0	0.043 | 1.0	0.042 | 1.0	0.041 | 1.0	0.04 | 1.0	0.051 | 1.0	0.054 | 1.0	0.052 | 1.0	0.051 | 1.0
DLK1_NOTCH2	CPI-SS0E1A8414D	simple:P80370	simple:Q04721	ENSG00000185559	ENSG00000134250	curated	FALSE	FALSE	0.004 | 1.0	0.003 | 1.0	0.002 | 1.0	0.001 | 1.0	0.004 | 1.0	0.002 | 1.0	0.002 | 1.0	0.0 | 1.0	0.0 | 1.0	0.0 | 1.0	0.0 | 1.0	0.0 | 1.0	0.0 | 1.0	0.0 | 1.0	0.005 | 1.0	0.008 | 1.0	0.006 | 1.0	0.005 | 1.0	0.027 | 1.0	0.026 | 1.0	0.025 | 1.0	0.002 | 1.0	0.005 | 1.0	0.003 | 1.0	0.002 | 1.0
JAG2_NOTCH2	CPI-SS065B2DBAE	simple:Q9Y219	simple:Q04721	ENSG00000184916	ENSG00000134250	curated	FALSE	FALSE	0.007 | 1.0	0.005 | 1.0	0.004 | 1.0	0.003 | 1.0	0.006 | 1.0	0.003 | 1.0	0.003 | 1.0	0.01 | 1.0	0.013 | 1.0	0.011 | 1.0	0.01 | 1.0	0.005 | 1.0	0.004 | 1.0	0.003 | 1.0	0.004 | 1.0	0.007 | 1.0	0.004 | 1.0	0.004 | 1.0	0.004 | 1.0	0.003 | 1.0	0.002 | 1.0	0.002 | 1.0	0.005 | 1.0	0.003 | 1.0	0.002 | 1.0
DLL3_NOTCH2	CPI-SS06BBCAC08	simple:Q9NYJ7	simple:Q04721	ENSG00000090932	ENSG00000134250	curated	FALSE	FALSE	0.005 | 1.0	0.004 | 1.0	0.003 | 1.0	0.003 | 1.0	0.006 | 1.0	0.004 | 1.0	0.003 | 1.0	0.0 | 1.0	0.0 | 1.0	0.0 | 1.0	0.0 | 1.0	0.005 | 1.0	0.004 | 1.0	0.003 | 1.0	0.002 | 1.0	0.005 | 1.0	0.002 | 1.0	0.002 | 1.0	0.005 | 1.0	0.004 | 1.0	0.003 | 1.0	0.003 | 1.0	0.006 | 1.0	0.004 | 1.0	0.003 | 1.0
DLL4_NOTCH2	CPI-SS08E4D6FA9	simple:Q9NR61	simple:Q04721	ENSG00000128917	ENSG00000134250	curated	FALSE	FALSE	0.007 | 1.0	0.005 | 1.0	0.004 | 1.0	0.027 | 1.0	0.03 | 1.0	0.028 | 1.0	0.027 | 1.0	0.005 | 1.0	0.008 | 1.0	0.006 | 1.0	0.006 | 1.0	0.007 | 1.0	0.006 | 1.0	0.005 | 1.0	0.003 | 1.0	0.006 | 1.0	0.004 | 1.0	0.003 | 1.0	0.005 | 1.0	0.004 | 1.0	0.003 | 1.0	0.013 | 1.0	0.016 | 1.0	0.014 | 1.0	0.013 | 1.0
IL24_NOTCH2	CPI-SS00A37632E	simple:Q13007	simple:Q04721	ENSG00000162892	ENSG00000134250	MINT	TRUE	FALSE	0.0 | 1.0	0.0 | 1.0	0.0 | 1.0	0.001 | 1.0	0.004 | 1.0	0.002 | 1.0	0.002 | 1.0	0.015 | 1.0	0.018 | 1.0	0.015 | 1.0	0.015 | 1.0	0.022 | 1.0	0.021 | 1.0	0.02 | 1.0	0.002 | 1.0	0.005 | 1.0	0.002 | 1.0	0.002 | 1.0	0.004 | 1.0	0.003 | 1.0	0.002 | 1.0	0.002 | 1.0	0.005 | 1.0	0.003 | 1.0	0.002 | 1.0
JAG1_NOTCH4	CPI-SS0837E9F59	simple:P78504	simple:Q99466	ENSG00000101384	ENSG00000204301	curated	FALSE	FALSE	0.013 | 1.0	0.027 | 1.0	0.009 | 1.0	0.064 | 1.0	0.062 | 1.0	0.058 | 1.0	0.06 | 1.0	0.094 | 1.0	0.093 | 1.0	0.089 | 1.0	0.091 | 1.0	0.084 | 1.0	0.098 | 1.0	0.08 | 1.0	0.052 | 1.0	0.051 | 1.0	0.047 | 1.0	0.049 | 1.0	0.044 | 1.0	0.057 | 1.0	0.04 | 1.0	0.061 | 1.0	0.059 | 1.0	0.055 | 1.0	0.058 | 1.0
DLL1_NOTCH4	CPI-SS0FB5FE587	simple:O00548	simple:Q99466	ENSG00000198719	ENSG00000204301	curated	FALSE	FALSE	0.008 | 1.0	0.021 | 1.0	0.004 | 1.0	0.015 | 1.0	0.014 | 1.0	0.01 | 1.0	0.012 | 1.0	0.014 | 1.0	0.012 | 1.0	0.008 | 1.0	0.01 | 1.0	0.0 | 1.0	0.0 | 1.0	0.0 | 1.0	0.011 | 1.0	0.01 | 1.0	0.006 | 1.0	0.008 | 1.0	0.006 | 1.0	0.02 | 1.0	0.002 | 1.0	0.013 | 1.0	0.011 | 1.0	0.007 | 1.0	0.009 | 1.0
DLK1_NOTCH4	CPI-SS0D37C7C70	simple:P80370	simple:Q99466	ENSG00000185559	ENSG00000204301	curated	FALSE	FALSE	0.006 | 1.0	0.02 | 1.0	0.002 | 1.0	0.011 | 1.0	0.01 | 1.0	0.005 | 1.0	0.008 | 1.0	0.0 | 1.0	0.0 | 1.0	0.0 | 1.0	0.0 | 1.0	0.0 | 1.0	0.0 | 1.0	0.0 | 1.0	0.015 | 1.0	0.013 | 1.0	0.009 | 1.0	0.012 | 1.0	0.029 | 1.0	0.043 | 1.0	0.025 | 1.0	0.012 | 1.0	0.01 | 1.0	0.006 | 1.0	0.008 | 1.0
JAG2_NOTCH4	CPI-SS096F3E0F2	simple:Q9Y219	simple:Q99466	ENSG00000184916	ENSG00000204301	curated	FALSE	FALSE	0.008 | 1.0	0.022 | 1.0	0.004 | 1.0	0.013 | 1.0	0.011 | 1.0	0.007 | 1.0	0.009 | 1.0	0.02 | 1.0	0.018 | 1.0	0.014 | 1.0	0.016 | 1.0	0.007 | 1.0	0.021 | 1.0	0.003 | 1.0	0.014 | 1.0	0.012 | 1.0	0.008 | 1.0	0.01 | 1.0	0.006 | 1.0	0.02 | 1.0	0.002 | 1.0	0.012 | 1.0	0.01 | 1.0	0.006 | 1.0	0.008 | 1.0
DLL3_NOTCH4	CPI-SS098C2FFC0	simple:Q9NYJ7	simple:Q99466	ENSG00000090932	ENSG00000204301	curated	FALSE	FALSE	0.007 | 1.0	0.021 | 1.0	0.003 | 1.0	0.013 | 1.0	0.011 | 1.0	0.007 | 1.0	0.01 | 1.0	0.0 | 1.0	0.0 | 1.0	0.0 | 1.0	0.0 | 1.0	0.007 | 1.0	0.021 | 1.0	0.003 | 1.0	0.011 | 1.0	0.01 | 1.0	0.006 | 1.0	0.008 | 1.0	0.007 | 1.0	0.021 | 1.0	0.003 | 1.0	0.013 | 1.0	0.011 | 1.0	0.007 | 1.0	0.01 | 1.0
DLL4_NOTCH4	CPI-SS0558101D1	simple:Q9NR61	simple:Q99466	ENSG00000128917	ENSG00000204301	curated	FALSE	FALSE	0.008 | 1.0	0.022 | 1.0	0.004 | 1.0	0.037 | 1.0	0.035 | 1.0	0.031 | 1.0	0.033 | 1.0	0.015 | 1.0	0.014 | 1.0	0.01 | 1.0	0.012 | 1.0	0.009 | 1.0	0.023 | 1.0	0.005 | 1.0	0.013 | 1.0	0.011 | 1.0	0.007 | 1.0	0.009 | 1.0	0.007 | 1.0	0.021 | 1.0	0.003 | 1.0	0.023 | 1.0	0.021 | 1.0	0.017 | 1.0	0.019 | 1.0
TNFSF10_TNFRSF10B	CPI-SS001865B32	simple:P50591	simple:O14763	ENSG00000121858	ENSG00000120889	curated	TRUE	FALSE	0.066 | 1.0	0.101 | 1.0	0.04 | 1.0	0.041 | 1.0	0.139 | 1.0	0.027 | 1.0	0.03 | 1.0	0.072 | 1.0	0.17 | 1.0	0.057 | 1.0	0.061 | 1.0	0.073 | 1.0	0.108 | 1.0	0.047 | 1.0	0.041 | 1.0	0.139 | 1.0	0.027 | 1.0	0.03 | 1.0	0.066 | 1.0	0.101 | 1.0	0.04 | 1.0	0.044 | 1.0	0.142 | 1.0	0.029 | 1.0	0.033 | 1.0
TNFSF10_TNFRSF10D	CPI-SS095E52E66	simple:P50591	simple:Q9UBN6	ENSG00000121858	ENSG00000173530	curated	TRUE	FALSE	0.066 | 1.0	0.101 | 1.0	0.04 | 1.0	0.041 | 1.0	0.139 | 1.0	0.027 | 1.0	0.03 | 1.0	0.072 | 1.0	0.17 | 1.0	0.057 | 1.0	0.061 | 1.0	0.073 | 1.0	0.108 | 1.0	0.047 | 1.0	0.041 | 1.0	0.139 | 1.0	0.027 | 1.0	0.03 | 1.0	0.066 | 1.0	0.101 | 1.0	0.04 | 1.0	0.044 | 1.0	0.142 | 1.0	0.029 | 1.0	0.033 | 1.0
MIF_TNFRSF10D	CPI-SS059EEFDC6	simple:P14174	simple:Q9UBN6	ENSG00000240972	ENSG00000173530	IntAct	TRUE	FALSE	0.065 | 1.0	0.1 | 1.0	0.039 | 1.0	0.043 | 1.0	0.141 | 1.0	0.029 | 1.0	0.032 | 1.0	0.053 | 1.0	0.151 | 1.0	0.039 | 1.0	0.042 | 1.0	0.0 | 1.0	0.0 | 1.0	0.0 | 1.0	0.043 | 1.0	0.141 | 1.0	0.028 | 1.0	0.031 | 1.0	0.064 | 1.0	0.099 | 1.0	0.038 | 1.0	0.043 | 1.0	0.141 | 1.0	0.028 | 1.0	0.032 | 1.0
TNFSF10_TNFRSF11B	CPI-SS05A3055C3	simple:P50591	simple:O00300	ENSG00000121858	ENSG00000164761	curated	TRUE	FALSE	0.047 | 1.0	0.01 | 1.0	0.101 | 1.0	0.017 | 1.0	0.002 | 1.0	0.068 | 1.0	0.02 | 1.0	0.047 | 1.0	0.033 | 1.0	0.099 | 1.0	0.051 | 1.0	0.053 | 1.0	0.017 | 1.0	0.107 | 1.0	0.017 | 1.0	0.002 | 1.0	0.068 | 1.0	0.02 | 1.0	0.046 | 1.0	0.009 | 1.0	0.1 | 1.0	0.019 | 1.0	0.005 | 1.0	0.071 | 1.0	0.023 | 1.0
HLAC_KIR2DL3	CPI-SS0917CBD53	simple:HLAC	simple:P43628	ENSG00000204525	ENSG00000243772	curated	FALSE	FALSE	0.0 | 1.0	0.047 | 1.0	0.0 | 1.0	0.0 | 1.0	0.049 | 1.0	0.0 | 1.0	0.049 | 1.0	0.0 | 1.0	0.346 | 1.0	0.0 | 1.0	0.347 | 1.0	0.0 | 1.0	0.253 | 1.0	0.0 | 1.0	0.0 | 1.0	0.055 | 1.0	0.0 | 1.0	0.055 | 1.0	0.0 | 1.0	0.051 | 1.0	0.0 | 1.0	0.0 | 1.0	0.042 | 1.0	0.0 | 1.0	0.042 | 1.0
KIR2DL1_HLAC	CPI-SS0053057ED	simple:P43626	simple:HLAC	ENSG00000125498	ENSG00000204525	curated	FALSE	FALSE	0.0 | 1.0	0.0 | 1.0	0.0 | 1.0	0.0 | 1.0	0.0 | 1.0	0.0 | 1.0	0.0 | 1.0	0.049 | 1.0	0.346 | 1.0	0.055 | 1.0	0.042 | 1.0	0.047 | 1.0	0.253 | 1.0	0.051 | 1.0	0.0 | 1.0	0.0 | 1.0	0.0 | 1.0	0.0 | 1.0	0.0 | 1.0	0.0 | 1.0	0.0 | 1.0	0.049 | 1.0	0.347 | 1.0	0.055 | 1.0	0.042 | 1.0
C5_C5AR1	CPI-SS00581282E	simple:P01031	simple:P21730	ENSG00000106804	ENSG00000197405	guidetopharmacology.org	TRUE	FALSE	0.003 | 1.0	0.0 | 1.0	0.004 | 1.0	0.002 | 1.0	0.0 | 1.0	0.0 | 1.0	0.003 | 1.0	0.004 | 1.0	0.0 | 1.0	0.0 | 1.0	0.005 | 1.0	0.0 | 1.0	0.0 | 1.0	0.0 | 1.0	0.002 | 1.0	0.0 | 1.0	0.0 | 1.0	0.002 | 1.0	0.0 | 1.0	0.0 | 1.0	0.0 | 1.0	0.004 | 1.0	0.0 | 1.0	0.0 | 1.0	0.004 | 1.0
C5_C5AR2	CPI-SS0A7E3A1AF	simple:P01031	simple:Q9P296	ENSG00000106804	ENSG00000134830	guidetopharmacology.org	TRUE	FALSE	0.0 | 1.0	0.004 | 1.0	0.0 | 1.0	0.0 | 1.0	0.0 | 1.0	0.002 | 1.0	0.002 | 1.0	0.0 | 1.0	0.0 | 1.0	0.004 | 1.0	0.003 | 1.0	0.0 | 1.0	0.0 | 1.0	0.0 | 1.0	0.0 | 1.0	0.0 | 1.0	0.001 | 1.0	0.001 | 1.0	0.0 | 1.0	0.0 | 1.0	0.0 | 1.0	0.0 | 1.0	0.0 | 1.0	0.003 | 1.0	0.003 | 1.0
CD74_MIF	CPI-SS0ABC5C1B8	simple:P04233	simple:P14174	ENSG00000019582	ENSG00000240972	InnateDB-All	TRUE	FALSE	0.004 | 1.0	0.0 | 1.0	0.003 | 1.0	0.004 | 1.0	0.014 | 1.0	0.004 | 1.0	0.004 | 1.0	0.016 | 1.0	0.026 | 1.0	0.015 | 1.0	0.015 | 1.0	0.013 | 1.0	0.0 | 1.0	0.011 | 1.0	0.004 | 1.0	0.014 | 1.0	0.004 | 1.0	0.004 | 1.0	0.005 | 1.0	0.0 | 1.0	0.003 | 1.0	0.005 | 1.0	0.016 | 1.0	0.005 | 1.0	0.005 | 1.0
EFNA2_EPHA8	CPI-SS0830C7910	simple:O43921	simple:P29322	ENSG00000099617	ENSG00000070886	curated	FALSE	FALSE	0.0 | 1.0	0.003 | 1.0	0.0 | 1.0	0.0 | 1.0	0.0 | 1.0	0.0 | 1.0	0.0 | 1.0	0.002 | 1.0	0.002 | 1.0	0.0 | 1.0	0.001 | 1.0	0.0 | 1.0	0.0 | 1.0	0.0 | 1.0	0.0 | 1.0	0.0 | 1.0	0.0 | 1.0	0.0 | 1.0	0.0 | 1.0	0.0 | 1.0	0.0 | 1.0	0.002 | 1.0	0.003 | 1.0	0.0 | 1.0	0.002 | 1.0
EFNA3_EPHA8	CPI-SS0C8ED6F41	simple:P52797	simple:P29322	ENSG00000143590	ENSG00000070886	curated	FALSE	FALSE	0.0 | 1.0	0.003 | 1.0	0.0 | 1.0	0.0 | 1.0	0.0 | 1.0	0.0 | 1.0	0.0 | 1.0	0.002 | 1.0	0.003 | 1.0	0.0 | 1.0	0.002 | 1.0	0.0 | 1.0	0.0 | 1.0	0.0 | 1.0	0.0 | 1.0	0.0 | 1.0	0.0 | 1.0	0.0 | 1.0	0.0 | 1.0	0.0 | 1.0	0.0 | 1.0	0.0 | 1.0	0.0 | 1.0	0.0 | 1.0	0.0 | 1.0
EFNA5_EPHA8	CPI-SS0F6A01237	simple:P52803	simple:P29322	ENSG00000184349	ENSG00000070886	curated	FALSE	FALSE	0.0 | 1.0	0.0 | 1.0	0.0 | 1.0	0.001 | 1.0	0.002 | 1.0	0.0 | 1.0	0.001 | 1.0	0.002 | 1.0	0.003 | 1.0	0.0 | 1.0	0.002 | 1.0	0.0 | 1.0	0.004 | 1.0	0.0 | 1.0	0.0 | 1.0	0.0 | 1.0	0.0 | 1.0	0.0 | 1.0	0.0 | 1.0	0.003 | 1.0	0.0 | 1.0	0.0 | 1.0	0.0 | 1.0	0.0 | 1.0	0.0 | 1.0
EFNA1_EPHA8	CPI-SS037E6BEDF	simple:P20827	simple:P29322	ENSG00000169242	ENSG00000070886	curated	TRUE	FALSE	0.0 | 1.0	0.016 | 1.0	0.0 | 1.0	0.021 | 1.0	0.022 | 1.0	0.0 | 1.0	0.021 | 1.0	0.096 | 1.0	0.097 | 1.0	0.0 | 1.0	0.096 | 1.0	0.0 | 1.0	0.062 | 1.0	0.0 | 1.0	0.02 | 1.0	0.02 | 1.0	0.0 | 1.0	0.019 | 1.0	0.0 | 1.0	0.014 | 1.0	0.0 | 1.0	0.009 | 1.0	0.01 | 1.0	0.0 | 1.0	0.008 | 1.0
EFNA4_EPHA8	CPI-SS0AA68C8E5	simple:P52798	simple:P29322	ENSG00000243364	ENSG00000070886	curated	TRUE	FALSE	0.0 | 1.0	0.01 | 1.0	0.0 | 1.0	0.011 | 1.0	0.012 | 1.0	0.0 | 1.0	0.011 | 1.0	0.063 | 1.0	0.064 | 1.0	0.0 | 1.0	0.063 | 1.0	0.0 | 1.0	0.021 | 1.0	0.0 | 1.0	0.01 | 1.0	0.01 | 1.0	0.0 | 1.0	0.009 | 1.0	0.0 | 1.0	0.008 | 1.0	0.0 | 1.0	0.006 | 1.0	0.006 | 1.0	0.0 | 1.0	0.005 | 1.0
EFNA2_EPHA2	CPI-SS08A54963F	simple:O43921	simple:P29317	ENSG00000099617	ENSG00000142627	curated	FALSE	FALSE	0.099 | 1.0	0.18 | 1.0	0.057 | 1.0	0.0 | 1.0	0.0 | 1.0	0.0 | 1.0	0.0 | 1.0	0.053 | 1.0	0.13 | 1.0	0.083 | 1.0	0.051 | 1.0	0.0 | 1.0	0.0 | 1.0	0.0 | 1.0	0.0 | 1.0	0.0 | 1.0	0.0 | 1.0	0.0 | 1.0	0.0 | 1.0	0.0 | 1.0	0.0 | 1.0	0.054 | 1.0	0.131 | 1.0	0.084 | 1.0	0.052 | 1.0
EFNA3_EPHA2	CPI-SS0CBCBBA83	simple:P52797	simple:P29317	ENSG00000143590	ENSG00000142627	curated	FALSE	FALSE	0.099 | 1.0	0.179 | 1.0	0.057 | 1.0	0.0 | 1.0	0.0 | 1.0	0.0 | 1.0	0.0 | 1.0	0.054 | 1.0	0.131 | 1.0	0.084 | 1.0	0.052 | 1.0	0.0 | 1.0	0.0 | 1.0	0.0 | 1.0	0.0 | 1.0	0.0 | 1.0	0.0 | 1.0	0.0 | 1.0	0.0 | 1.0	0.0 | 1.0	0.0 | 1.0	0.0 | 1.0	0.0 | 1.0	0.0 | 1.0	0.0 | 1.0
EFNA5_EPHA2	CPI-SS09587DA63	simple:P52803	simple:P29317	ENSG00000184349	ENSG00000142627	curated	FALSE	FALSE	0.0 | 1.0	0.0 | 1.0	0.0 | 1.0	0.053 | 1.0	0.13 | 1.0	0.083 | 1.0	0.051 | 1.0	0.054 | 1.0	0.131 | 1.0	0.084 | 1.0	0.052 | 1.0	0.1 | 1.0	0.18 | 1.0	0.058 | 1.0	0.0 | 1.0	0.0 | 1.0	0.0 | 1.0	0.0 | 1.0	0.099 | 1.0	0.179 | 1.0	0.057 | 1.0	0.0 | 1.0	0.0 | 1.0	0.0 | 1.0	0.0 | 1.0
EFNA1_EPHA2	CPI-SS046F6F0C1	simple:P20827	simple:P29317	ENSG00000169242	ENSG00000142627	curated	TRUE	FALSE	0.112 | 1.0	0.193 | 1.0	0.07 | 1.0	0.073 | 1.0	0.15 | 1.0	0.103 | 1.0	0.071 | 1.0	0.148 | 1.0	0.225 | 0.0	0.178 | 0.0	0.146 | 1.0	0.159 | 1.0	0.239 | 1.0	0.117 | 1.0	0.071 | 1.0	0.148 | 1.0	0.101 | 1.0	0.069 | 1.0	0.11 | 1.0	0.19 | 1.0	0.068 | 1.0	0.061 | 1.0	0.137 | 1.0	0.09 | 1.0	0.059 | 1.0
EFNA4_EPHA2	CPI-SS0475BE8ED	simple:P52798	simple:P29317	ENSG00000243364	ENSG00000142627	curated	TRUE	FALSE	0.106 | 1.0	0.186 | 1.0	0.064 | 1.0	0.063 | 1.0	0.14 | 1.0	0.093 | 1.0	0.061 | 1.0	0.115 | 1.0	0.192 | 1.0	0.145 | 1.0	0.113 | 1.0	0.117 | 1.0	0.197 | 1.0	0.075 | 1.0	0.061 | 1.0	0.138 | 1.0	0.091 | 1.0	0.059 | 1.0	0.105 | 1.0	0.185 | 1.0	0.063 | 1.0	0.058 | 1.0	0.134 | 1.0	0.087 | 1.0	0.056 | 1.0
EFNA2_EPHA3	CPI-SS0C875BA24	simple:O43921	simple:P29320	ENSG00000099617	ENSG00000044524	curated	TRUE	FALSE	0.004 | 1.0	0.007 | 1.0	0.066 | 1.0	0.0 | 1.0	0.0 | 1.0	0.0 | 1.0	0.0 | 1.0	0.004 | 1.0	0.003 | 1.0	0.022 | 1.0	0.003 | 1.0	0.0 | 1.0	0.0 | 1.0	0.0 | 1.0	0.0 | 1.0	0.0 | 1.0	0.0 | 1.0	0.0 | 1.0	0.0 | 1.0	0.0 | 1.0	0.0 | 1.0	0.004 | 1.0	0.003 | 1.0	0.023 | 1.0	0.003 | 1.0
EFNA3_EPHA3	CPI-SS0EF309375	simple:P52797	simple:P29320	ENSG00000143590	ENSG00000044524	curated	TRUE	FALSE	0.004 | 1.0	0.007 | 1.0	0.065 | 1.0	0.0 | 1.0	0.0 | 1.0	0.0 | 1.0	0.0 | 1.0	0.005 | 1.0	0.004 | 1.0	0.023 | 1.0	0.003 | 1.0	0.0 | 1.0	0.0 | 1.0	0.0 | 1.0	0.0 | 1.0	0.0 | 1.0	0.0 | 1.0	0.0 | 1.0	0.0 | 1.0	0.0 | 1.0	0.0 | 1.0	0.0 | 1.0	0.0 | 1.0	0.0 | 1.0	0.0 | 1.0
EFNA5_EPHA3	CPI-SS0C70ADA28	simple:P52803	simple:P29320	ENSG00000184349	ENSG00000044524	curated	TRUE	FALSE	0.0 | 1.0	0.0 | 1.0	0.0 | 1.0	0.004 | 1.0	0.003 | 1.0	0.022 | 1.0	0.002 | 1.0	0.005 | 1.0	0.004 | 1.0	0.023 | 1.0	0.003 | 1.0	0.005 | 1.0	0.008 | 1.0	0.067 | 1.0	0.0 | 1.0	0.0 | 1.0	0.0 | 1.0	0.0 | 1.0	0.004 | 1.0	0.007 | 1.0	0.066 | 1.0	0.0 | 1.0	0.0 | 1.0	0.0 | 1.0	0.0 | 1.0
EFNA1_EPHA3	CPI-SS09CA492BA	simple:P20827	simple:P29320	ENSG00000169242	ENSG00000044524	curated	TRUE	FALSE	0.017 | 1.0	0.02 | 1.0	0.079 | 1.0	0.024 | 1.0	0.023 | 1.0	0.042 | 1.0	0.022 | 1.0	0.098 | 1.0	0.097 | 1.0	0.117 | 1.0	0.097 | 1.0	0.063 | 1.0	0.066 | 1.0	0.125 | 1.0	0.022 | 1.0	0.021 | 1.0	0.04 | 1.0	0.021 | 1.0	0.015 | 1.0	0.018 | 1.0	0.076 | 1.0	0.011 | 1.0	0.01 | 1.0	0.03 | 1.0	0.01 | 1.0
EFNA4_EPHA3	CPI-SS0D1D8FF06	simple:P52798	simple:P29320	ENSG00000243364	ENSG00000044524	curated	TRUE	FALSE	0.011 | 1.0	0.014 | 1.0	0.072 | 1.0	0.014 | 1.0	0.013 | 1.0	0.032 | 1.0	0.012 | 1.0	0.066 | 1.0	0.065 | 1.0	0.084 | 1.0	0.064 | 1.0	0.022 | 1.0	0.025 | 1.0	0.083 | 1.0	0.012 | 1.0	0.011 | 1.0	0.03 | 1.0	0.011 | 1.0	0.01 | 1.0	0.012 | 1.0	0.071 | 1.0	0.008 | 1.0	0.007 | 1.0	0.026 | 1.0	0.007 | 1.0
EFNA2_EPHA1	CPI-SS0B34CBA4B	simple:O43921	simple:P21709	ENSG00000099617	ENSG00000146904	curated	FALSE	FALSE	0.004 | 1.0	0.026 | 1.0	0.007 | 1.0	0.0 | 1.0	0.0 | 1.0	0.0 | 1.0	0.0 | 1.0	0.002 | 1.0	0.033 | 1.0	0.002 | 1.0	0.004 | 1.0	0.0 | 1.0	0.0 | 1.0	0.0 | 1.0	0.0 | 1.0	0.0 | 1.0	0.0 | 1.0	0.0 | 1.0	0.0 | 1.0	0.0 | 1.0	0.0 | 1.0	0.002 | 1.0	0.034 | 1.0	0.003 | 1.0	0.005 | 1.0
EFNA3_EPHA1	CPI-SS0222DF7B4	simple:P52797	simple:P21709	ENSG00000143590	ENSG00000146904	curated	FALSE	FALSE	0.003 | 1.0	0.025 | 1.0	0.007 | 1.0	0.0 | 1.0	0.0 | 1.0	0.0 | 1.0	0.0 | 1.0	0.002 | 1.0	0.034 | 1.0	0.003 | 1.0	0.005 | 1.0	0.0 | 1.0	0.0 | 1.0	0.0 | 1.0	0.0 | 1.0	0.0 | 1.0	0.0 | 1.0	0.0 | 1.0	0.0 | 1.0	0.0 | 1.0	0.0 | 1.0	0.0 | 1.0	0.0 | 1.0	0.0 | 1.0	0.0 | 1.0
EFNA5_EPHA1	CPI-SS04E33D0FB	simple:P52803	simple:P21709	ENSG00000184349	ENSG00000146904	curated	FALSE	FALSE	0.0 | 1.0	0.0 | 1.0	0.0 | 1.0	0.001 | 1.0	0.033 | 1.0	0.002 | 1.0	0.004 | 1.0	0.002 | 1.0	0.034 | 1.0	0.003 | 1.0	0.005 | 1.0	0.005 | 1.0	0.027 | 1.0	0.008 | 1.0	0.0 | 1.0	0.0 | 1.0	0.0 | 1.0	0.0 | 1.0	0.004 | 1.0	0.026 | 1.0	0.007 | 1.0	0.0 | 1.0	0.0 | 1.0	0.0 | 1.0	0.0 | 1.0
EFNA1_EPHA1	CPI-SS0FF49C823	simple:P20827	simple:P21709	ENSG00000169242	ENSG00000146904	curated	TRUE	FALSE	0.017 | 1.0	0.039 | 1.0	0.02 | 1.0	0.021 | 1.0	0.053 | 1.0	0.022 | 1.0	0.024 | 1.0	0.096 | 1.0	0.128 | 1.0	0.097 | 1.0	0.099 | 1.0	0.063 | 1.0	0.085 | 1.0	0.066 | 1.0	0.02 | 1.0	0.051 | 1.0	0.02 | 1.0	0.022 | 1.0	0.014 | 1.0	0.036 | 1.0	0.018 | 1.0	0.009 | 1.0	0.041 | 1.0	0.009 | 1.0	0.011 | 1.0
EFNA4_EPHA1	CPI-SS05BB5902B	simple:P52798	simple:P21709	ENSG00000243364	ENSG00000146904	curated	TRUE	FALSE	0.01 | 1.0	0.033 | 1.0	0.014 | 1.0	0.011 | 1.0	0.043 | 1.0	0.012 | 1.0	0.014 | 1.0	0.063 | 1.0	0.095 | 1.0	0.064 | 1.0	0.066 | 1.0	0.021 | 1.0	0.044 | 1.0	0.025 | 1.0	0.01 | 1.0	0.041 | 1.0	0.01 | 1.0	0.012 | 1.0	0.009 | 1.0	0.031 | 1.0	0.013 | 1.0	0.006 | 1.0	0.038 | 1.0	0.006 | 1.0	0.008 | 1.0
EFNA2_EPHA5	CPI-SS0D81D9F5E	simple:O43921	simple:P54756	ENSG00000099617	ENSG00000145242	curated	FALSE	FALSE	0.004 | 1.0	0.009 | 1.0	0.003 | 1.0	0.0 | 1.0	0.0 | 1.0	0.0 | 1.0	0.0 | 1.0	0.003 | 1.0	0.005 | 1.0	0.003 | 1.0	0.003 | 1.0	0.0 | 1.0	0.0 | 1.0	0.0 | 1.0	0.0 | 1.0	0.0 | 1.0	0.0 | 1.0	0.0 | 1.0	0.0 | 1.0	0.0 | 1.0	0.0 | 1.0	0.003 | 1.0	0.006 | 1.0	0.003 | 1.0	0.003 | 1.0
EFNA3_EPHA5	CPI-SS079EF5D9C	simple:P52797	simple:P54756	ENSG00000143590	ENSG00000145242	curated	FALSE	FALSE	0.004 | 1.0	0.009 | 1.0	0.003 | 1.0	0.0 | 1.0	0.0 | 1.0	0.0 | 1.0	0.0 | 1.0	0.004 | 1.0	0.006 | 1.0	0.004 | 1.0	0.003 | 1.0	0.0 | 1.0	0.0 | 1.0	0.0 | 1.0	0.0 | 1.0	0.0 | 1.0	0.0 | 1.0	0.0 | 1.0	0.0 | 1.0	0.0 | 1.0	0.0 | 1.0	0.0 | 1.0	0.0 | 1.0	0.0 | 1.0	0.0 | 1.0
EFNA5_EPHA5	CPI-SS09E3F5044	simple:P52803	simple:P54756	ENSG00000184349	ENSG00000145242	curated	FALSE	FALSE	0.0 | 1.0	0.0 | 1.0	0.0 | 1.0	0.003 | 1.0	0.005 | 1.0	0.003 | 1.0	0.002 | 1.0	0.004 | 1.0	0.006 | 1.0	0.004 | 1.0	0.003 | 1.0	0.005 | 1.0	0.01 | 1.0	0.004 | 1.0	0.0 | 1.0	0.0 | 1.0	0.0 | 1.0	0.0 | 1.0	0.004 | 1.0	0.009 | 1.0	0.003 | 1.0	0.0 | 1.0	0.0 | 1.0	0.0 | 1.0	0.0 | 1.0
EFNA1_EPHA5	CPI-SS0762B455F	simple:P20827	simple:P54756	ENSG00000169242	ENSG00000145242	curated	TRUE	FALSE	0.017 | 1.0	0.022 | 1.0	0.016 | 1.0	0.023 | 1.0	0.025 | 1.0	0.023 | 1.0	0.022 | 1.0	0.097 | 1.0	0.1 | 1.0	0.097 | 1.0	0.097 | 1.0	0.063 | 1.0	0.068 | 1.0	0.062 | 1.0	0.021 | 1.0	0.023 | 1.0	0.021 | 1.0	0.021 | 1.0	0.015 | 1.0	0.02 | 1.0	0.014 | 1.0	0.01 | 1.0	0.013 | 1.0	0.01 | 1.0	0.01 | 1.0
EFNA4_EPHA5	CPI-SS0008137B6	simple:P52798	simple:P54756	ENSG00000243364	ENSG00000145242	curated	TRUE	FALSE	0.011 | 1.0	0.016 | 1.0	0.01 | 1.0	0.013 | 1.0	0.015 | 1.0	0.012 | 1.0	0.012 | 1.0	0.065 | 1.0	0.067 | 1.0	0.065 | 1.0	0.064 | 1.0	0.022 | 1.0	0.027 | 1.0	0.021 | 1.0	0.011 | 1.0	0.013 | 1.0	0.011 | 1.0	0.011 | 1.0	0.01 | 1.0	0.015 | 1.0	0.008 | 1.0	0.007 | 1.0	0.01 | 1.0	0.007 | 1.0	0.007 | 1.0
EFNA3_EPHA4	CPI-SS05B4EB419	simple:P52797	simple:P54764	ENSG00000143590	ENSG00000116106	curated	FALSE	FALSE	0.093 | 1.0	0.185 | 1.0	0.059 | 1.0	0.0 | 1.0	0.0 | 1.0	0.0 | 1.0	0.0 | 1.0	0.245 | 1.0	0.216 | 1.0	0.073 | 1.0	0.252 | 1.0	0.0 | 1.0	0.0 | 1.0	0.0 | 1.0	0.0 | 1.0	0.0 | 1.0	0.0 | 1.0	0.0 | 1.0	0.0 | 1.0	0.0 | 1.0	0.0 | 1.0	0.0 | 1.0	0.0 | 1.0	0.0 | 1.0	0.0 | 1.0
EFNA5_EPHA4	CPI-SS0FC01B947	simple:P52803	simple:P54764	ENSG00000184349	ENSG00000116106	curated	FALSE	FALSE	0.0 | 1.0	0.0 | 1.0	0.0 | 1.0	0.244 | 1.0	0.215 | 1.0	0.071 | 1.0	0.251 | 1.0	0.245 | 1.0	0.216 | 1.0	0.073 | 1.0	0.252 | 1.0	0.094 | 1.0	0.187 | 1.0	0.061 | 1.0	0.0 | 1.0	0.0 | 1.0	0.0 | 1.0	0.0 | 1.0	0.093 | 1.0	0.186 | 1.0	0.059 | 1.0	0.0 | 1.0	0.0 | 1.0	0.0 | 1.0	0.0 | 1.0
EFNA1_EPHA4	CPI-SS0EBFE1854	simple:P20827	simple:P54764	ENSG00000169242	ENSG00000116106	curated	TRUE	FALSE	0.107 | 1.0	0.199 | 1.0	0.073 | 1.0	0.264 | 1.0	0.235 | 1.0	0.092 | 1.0	0.271 | 1.0	0.339 | 0.0	0.31 | 0.0	0.166 | 1.0	0.345 | 0.0	0.153 | 1.0	0.245 | 1.0	0.119 | 1.0	0.262 | 1.0	0.233 | 1.0	0.09 | 1.0	0.269 | 1.0	0.104 | 1.0	0.196 | 1.0	0.07 | 1.0	0.252 | 1.0	0.223 | 1.0	0.079 | 1.0	0.258 | 1.0
EFNA4_EPHA4	CPI-SS0659DBE72	simple:P52798	simple:P54764	ENSG00000243364	ENSG00000116106	curated	TRUE	FALSE	0.1 | 1.0	0.192 | 1.0	0.066 | 1.0	0.254 | 1.0	0.225 | 1.0	0.081 | 1.0	0.26 | 1.0	0.306 | 1.0	0.277 | 1.0	0.133 | 1.0	0.313 | 1.0	0.111 | 1.0	0.203 | 1.0	0.077 | 1.0	0.252 | 1.0	0.223 | 1.0	0.08 | 1.0	0.259 | 1.0	0.099 | 1.0	0.191 | 1.0	0.065 | 1.0	0.249 | 1.0	0.22 | 1.0	0.076 | 1.0	0.255 | 1.0
EFNB1_EPHA4	CPI-SS03446CB39	simple:P98172	simple:P54764	ENSG00000090776	ENSG00000116106	curated	FALSE	FALSE	0.178 | 1.0	0.271 | 0.627	0.144 | 1.0	0.363 | 0.0	0.333 | 0.0	0.19 | 1.0	0.369 | 0.0	0.298 | 1.0	0.269 | 1.0	0.125 | 1.0	0.304 | 1.0	0.153 | 1.0	0.245 | 0.83	0.119 | 1.0	0.366 | 0.0	0.337 | 0.0	0.194 | 1.0	0.373 | 0.0	0.26 | 0.86	0.353 | 0.008	0.227 | 1.0	0.356 | 0.0	0.327 | 0.004	0.183 | 1.0	0.362 | 0.0
EFNB2_EPHA4	CPI-SS087E0E3FB	simple:P52799	simple:P54764	ENSG00000125266	ENSG00000116106	curated	FALSE	FALSE	0.124 | 1.0	0.217 | 1.0	0.091 | 1.0	0.322 | 1.0	0.292 | 1.0	0.149 | 1.0	0.328 | 1.0	0.759 | 0.0	0.73 | 0.0	0.586 | 1.0	0.765 | 0.0	0.555 | 0.0	0.647 | 0.0	0.521 | 1.0	0.298 | 1.0	0.268 | 1.0	0.125 | 1.0	0.304 | 1.0	0.12 | 1.0	0.212 | 1.0	0.086 | 1.0	0.295 | 1.0	0.266 | 1.0	0.122 | 1.0	0.301 | 1.0
EFNB3_EPHA4	CPI-SS084B1ED25	simple:Q15768	simple:P54764	ENSG00000108947	ENSG00000116106	curated	FALSE	FALSE	0.133 | 1.0	0.225 | 1.0	0.099 | 1.0	0.277 | 1.0	0.248 | 1.0	0.104 | 1.0	0.283 | 1.0	0.255 | 1.0	0.226 | 1.0	0.082 | 1.0	0.262 | 1.0	0.107 | 1.0	0.199 | 1.0	0.073 | 1.0	0.277 | 1.0	0.248 | 1.0	0.104 | 1.0	0.283 | 1.0	0.11 | 1.0	0.202 | 1.0	0.076 | 1.0	0.282 | 1.0	0.253 | 1.0	0.109 | 1.0	0.288 | 1.0
EFNA3_EPHA7	CPI-SS0D5DBB634	simple:P52797	simple:Q15375	ENSG00000143590	ENSG00000135333	curated	FALSE	FALSE	0.003 | 1.0	0.007 | 1.0	0.007 | 1.0	0.0 | 1.0	0.0 | 1.0	0.0 | 1.0	0.0 | 1.0	0.003 | 1.0	0.007 | 1.0	0.014 | 1.0	0.005 | 1.0	0.0 | 1.0	0.0 | 1.0	0.0 | 1.0	0.0 | 1.0	0.0 | 1.0	0.0 | 1.0	0.0 | 1.0	0.0 | 1.0	0.0 | 1.0	0.0 | 1.0	0.0 | 1.0	0.0 | 1.0	0.0 | 1.0	0.0 | 1.0
EFNA1_EPHA7	CPI-SS03E450F99	simple:P20827	simple:Q15375	ENSG00000169242	ENSG00000135333	curated	TRUE	FALSE	0.017 | 1.0	0.02 | 1.0	0.02 | 1.0	0.022 | 1.0	0.026 | 1.0	0.033 | 1.0	0.024 | 1.0	0.097 | 1.0	0.1 | 1.0	0.107 | 1.0	0.098 | 1.0	0.063 | 1.0	0.066 | 1.0	0.066 | 1.0	0.021 | 1.0	0.024 | 1.0	0.031 | 1.0	0.022 | 1.0	0.014 | 1.0	0.018 | 1.0	0.018 | 1.0	0.01 | 1.0	0.013 | 1.0	0.02 | 1.0	0.011 | 1.0
EFNA4_EPHA7	CPI-SS0F81DBF22	simple:P52798	simple:Q15375	ENSG00000243364	ENSG00000135333	curated	TRUE	FALSE	0.01 | 1.0	0.014 | 1.0	0.014 | 1.0	0.012 | 1.0	0.016 | 1.0	0.022 | 1.0	0.013 | 1.0	0.064 | 1.0	0.068 | 1.0	0.075 | 1.0	0.065 | 1.0	0.021 | 1.0	0.025 | 1.0	0.025 | 1.0	0.01 | 1.0	0.014 | 1.0	0.021 | 1.0	0.012 | 1.0	0.009 | 1.0	0.012 | 1.0	0.013 | 1.0	0.007 | 1.0	0.01 | 1.0	0.017 | 1.0	0.008 | 1.0
INSR_INS	CPI-SS0BE88A4E2	simple:P06213	simple:P01308	ENSG00000171105	ENSG00000254647	curated	TRUE	FALSE	0.024 | 1.0	0.0 | 1.0	0.0 | 1.0	0.0 | 1.0	0.0 | 1.0	0.011 | 1.0	0.0 | 1.0	0.0 | 1.0	0.0 | 1.0	0.012 | 1.0	0.0 | 1.0	0.005 | 1.0	0.0 | 1.0	0.0 | 1.0	0.0 | 1.0	0.0 | 1.0	0.013 | 1.0	0.0 | 1.0	0.019 | 1.0	0.0 | 1.0	0.0 | 1.0	0.0 | 1.0	0.0 | 1.0	0.005 | 1.0	0.0 | 1.0
IGF2_IGF2R	CPI-SS042A6F835	simple:P01344	simple:P11717	ENSG00000167244	ENSG00000197081	curated	TRUE	FALSE	2.821 | 0.0	1.878 | 0.487	2.205 | 0.0	1.287 | 1.0	1.184 | 1.0	1.642 | 1.0	1.286 | 1.0	0.463 | 1.0	0.361 | 1.0	0.818 | 1.0	0.463 | 1.0	1.454 | 1.0	0.51 | 1.0	0.837 | 1.0	2.472 | 0.0	2.369 | 0.0	2.827 | 0.0	2.472 | 0.0	4.484 | 0.0	3.541 | 0.0	3.867 | 0.0	1.499 | 1.0	1.396 | 1.0	1.854 | 0.676	1.499 | 1.0
PTPRC_CD22	CPI-SS0CBC7840D	simple:P08575	simple:P20273	ENSG00000081237	ENSG00000012124	curated	FALSE	FALSE	0.007 | 1.0	0.006 | 1.0	0.005 | 1.0	0.005 | 1.0	0.0 | 1.0	0.005 | 1.0	0.005 | 1.0	0.003 | 1.0	0.0 | 1.0	0.003 | 1.0	0.003 | 1.0	0.0 | 1.0	0.0 | 1.0	0.0 | 1.0	0.005 | 1.0	0.0 | 1.0	0.005 | 1.0	0.005 | 1.0	0.004 | 1.0	0.003 | 1.0	0.002 | 1.0	0.005 | 1.0	0.0 | 1.0	0.005 | 1.0	0.005 | 1.0
PTPRC_MRC1	CPI-SS0822AEF5F	simple:P08575	simple:P22897	ENSG00000081237	ENSG00000260314	curated	FALSE	FALSE	0.01 | 1.0	0.011 | 1.0	0.006 | 1.0	0.007 | 1.0	0.007 | 1.0	0.007 | 1.0	0.006 | 1.0	0.005 | 1.0	0.005 | 1.0	0.005 | 1.0	0.005 | 1.0	0.0 | 1.0	0.0 | 1.0	0.0 | 1.0	0.007 | 1.0	0.007 | 1.0	0.007 | 1.0	0.007 | 1.0	0.006 | 1.0	0.007 | 1.0	0.003 | 1.0	0.007 | 1.0	0.007 | 1.0	0.007 | 1.0	0.006 | 1.0
EPO_EPOR	CPI-SS087A17AD6	simple:P01588	simple:P19235	ENSG00000130427	ENSG00000187266	curated	TRUE	FALSE	0.004 | 1.0	0.007 | 1.0	0.0 | 1.0	0.001 | 1.0	0.0 | 1.0	0.0 | 1.0	0.0 | 1.0	0.0 | 1.0	0.0 | 1.0	0.0 | 1.0	0.0 | 1.0	0.0 | 1.0	0.0 | 1.0	0.0 | 1.0	0.0 | 1.0	0.0 | 1.0	0.0 | 1.0	0.0 | 1.0	0.0 | 1.0	0.0 | 1.0	0.0 | 1.0	0.002 | 1.0	0.0 | 1.0	0.0 | 1.0	0.0 | 1.0
EPO_EPHB4	CPI-SS0A0DE9CD6	simple:P01588	simple:P54760	ENSG00000130427	ENSG00000196411	IntAct	TRUE	FALSE	0.09 | 1.0	0.065 | 1.0	0.108 | 1.0	0.079 | 1.0	0.088 | 1.0	0.094 | 1.0	0.079 | 1.0	0.0 | 1.0	0.0 | 1.0	0.0 | 1.0	0.0 | 1.0	0.0 | 1.0	0.0 | 1.0	0.0 | 1.0	0.0 | 1.0	0.0 | 1.0	0.0 | 1.0	0.0 | 1.0	0.0 | 1.0	0.0 | 1.0	0.0 | 1.0	0.08 | 1.0	0.089 | 1.0	0.095 | 1.0	0.08 | 1.0
EFNB1_EPHB4	CPI-SS09D9D6811	simple:P98172	simple:P54760	ENSG00000090776	ENSG00000196411	curated	FALSE	FALSE	0.174 | 0.904	0.15 | 1.0	0.192 | 0.441	0.198 | 0.302	0.206 | 0.156	0.213 | 0.044	0.198 | 0.252	0.133 | 1.0	0.142 | 1.0	0.148 | 1.0	0.133 | 1.0	0.149 | 0.992	0.124 | 1.0	0.167 | 0.884	0.201 | 0.2	0.21 | 0.116	0.217 | 0.019	0.201 | 0.156	0.257 | 0.0	0.232 | 1.0	0.275 | 0.0	0.191 | 0.505	0.199 | 0.238	0.206 | 0.087	0.191 | 0.465
EFNB2_EPHB4	CPI-SS08D0F9109	simple:P52799	simple:P54760	ENSG00000125266	ENSG00000196411	curated	FALSE	FALSE	0.121 | 1.0	0.096 | 1.0	0.139 | 1.0	0.157 | 1.0	0.165 | 1.0	0.172 | 1.0	0.157 | 1.0	0.594 | 0.0	0.603 | 0.0	0.609 | 0.0	0.594 | 0.0	0.551 | 0.0	0.527 | 1.0	0.569 | 0.0	0.133 | 1.0	0.141 | 1.0	0.148 | 1.0	0.133 | 1.0	0.116 | 1.0	0.091 | 1.0	0.134 | 1.0	0.13 | 1.0	0.139 | 1.0	0.145 | 1.0	0.13 | 1.0
EFNB3_EPHB4	CPI-SS0F6AA700E	simple:Q15768	simple:P54760	ENSG00000108947	ENSG00000196411	curated	FALSE	FALSE	0.129 | 1.0	0.105 | 1.0	0.147 | 1.0	0.112 | 1.0	0.121 | 1.0	0.127 | 1.0	0.112 | 1.0	0.09 | 1.0	0.099 | 1.0	0.105 | 1.0	0.09 | 1.0	0.103 | 1.0	0.079 | 1.0	0.121 | 1.0	0.112 | 1.0	0.121 | 1.0	0.127 | 1.0	0.112 | 1.0	0.106 | 1.0	0.082 | 1.0	0.124 | 1.0	0.117 | 1.0	0.126 | 1.0	0.132 | 1.0	0.117 | 1.0
CD48_CD244	CPI-SS056FF4363	simple:P09326	simple:Q9BZW8	ENSG00000117091	ENSG00000122223	curated	FALSE	FALSE	0.198 | 1.0	0.194 | 1.0	0.0 | 1.0	0.17 | 1.0	0.17 | 1.0	0.171 | 1.0	0.171 | 1.0	0.067 | 1.0	0.067 | 1.0	0.068 | 1.0	0.068 | 1.0	0.09 | 1.0	0.085 | 1.0	0.0 | 1.0	0.185 | 1.0	0.185 | 1.0	0.186 | 1.0	0.186 | 1.0	0.174 | 1.0	0.169 | 1.0	0.0 | 1.0	0.166 | 1.0	0.166 | 1.0	0.166 | 1.0	0.166 | 1.0
APLN_APLNR	CPI-SS086CB298F	simple:Q9ULZ1	simple:P35414	ENSG00000171388	ENSG00000134817	guidetopharmacology.org	TRUE	FALSE	0.024 | 1.0	0.0 | 1.0	0.016 | 1.0	0.014 | 1.0	0.02 | 1.0	0.02 | 1.0	0.017 | 1.0	0.007 | 1.0	0.014 | 1.0	0.013 | 1.0	0.011 | 1.0	0.022 | 1.0	0.0 | 1.0	0.014 | 1.0	0.04 | 1.0	0.046 | 1.0	0.046 | 1.0	0.043 | 1.0	0.043 | 1.0	0.0 | 1.0	0.034 | 1.0	0.023 | 1.0	0.029 | 1.0	0.029 | 1.0	0.026 | 1.0
AGT_AGTR1	CPI-SS05996C8FD	simple:P01019	simple:P30556	ENSG00000135744	ENSG00000144891	guidetopharmacology.org	TRUE	FALSE	0.0 | 1.0	0.0 | 1.0	0.0 | 1.0	0.013 | 1.0	0.007 | 1.0	0.13 | 1.0	0.024 | 1.0	0.013 | 1.0	0.007 | 1.0	0.131 | 1.0	0.024 | 1.0	0.0 | 1.0	0.0 | 1.0	0.0 | 1.0	0.013 | 1.0	0.007 | 1.0	0.131 | 1.0	0.024 | 1.0	0.0 | 1.0	0.0 | 1.0	0.0 | 1.0	0.014 | 1.0	0.008 | 1.0	0.131 | 1.0	0.025 | 1.0
AGT_AGTR2	CPI-SS069924427	simple:P01019	simple:P50052	ENSG00000135744	ENSG00000180772	guidetopharmacology.org	TRUE	FALSE	0.0 | 1.0	0.0 | 1.0	0.0 | 1.0	0.088 | 1.0	0.013 | 1.0	0.214 | 1.0	0.125 | 1.0	0.088 | 1.0	0.013 | 1.0	0.214 | 1.0	0.126 | 1.0	0.0 | 1.0	0.0 | 1.0	0.0 | 1.0	0.088 | 1.0	0.013 | 1.0	0.214 | 1.0	0.126 | 1.0	0.0 | 1.0	0.0 | 1.0	0.0 | 1.0	0.089 | 1.0	0.014 | 1.0	0.215 | 1.0	0.126 | 1.0
JAM2_JAM3	CPI-SS087B53ABF	simple:P57087	simple:Q9BX67	ENSG00000154721	ENSG00000166086	curated	TRUE	FALSE	0.052 | 1.0	0.016 | 1.0	0.075 | 1.0	0.096 | 1.0	0.038 | 1.0	0.065 | 1.0	0.078 | 1.0	0.074 | 1.0	0.016 | 1.0	0.044 | 1.0	0.056 | 1.0	0.052 | 1.0	0.017 | 1.0	0.075 | 1.0	0.086 | 1.0	0.028 | 1.0	0.056 | 1.0	0.069 | 1.0	0.072 | 1.0	0.036 | 1.0	0.095 | 1.0	0.103 | 1.0	0.045 | 1.0	0.073 | 1.0	0.086 | 1.0
PRLH_PRLHR	CPI-SS0853B2D1C	simple:P81277	simple:P49683	ENSG00000071677	ENSG00000119973	guidetopharmacology.org	TRUE	FALSE	0.0 | 1.0	0.0 | 1.0	0.0 | 1.0	0.0 | 1.0	0.0 | 1.0	0.0 | 1.0	0.0 | 1.0	0.004 | 1.0	0.005 | 1.0	0.004 | 1.0	0.003 | 1.0	0.0 | 1.0	0.0 | 1.0	0.0 | 1.0	0.0 | 1.0	0.0 | 1.0	0.0 | 1.0	0.0 | 1.0	0.0 | 1.0	0.0 | 1.0	0.0 | 1.0	0.0 | 1.0	0.0 | 1.0	0.0 | 1.0	0.0 | 1.0
PTH_PTH1R	CPI-SS0F32DB87D	simple:P01270	simple:Q03431	ENSG00000152266	ENSG00000160801	InnateDB-All	TRUE	FALSE	0.054 | 1.0	0.007 | 1.0	0.038 | 1.0	0.0 | 1.0	0.0 | 1.0	0.0 | 1.0	0.0 | 1.0	0.0 | 1.0	0.0 | 1.0	0.0 | 1.0	0.0 | 1.0	0.0 | 1.0	0.0 | 1.0	0.0 | 1.0	0.0 | 1.0	0.0 | 1.0	0.0 | 1.0	0.0 | 1.0	0.0 | 1.0	0.0 | 1.0	0.0 | 1.0	0.0 | 1.0	0.0 | 1.0	0.0 | 1.0	0.0 | 1.0
PTH_PTH2R	CPI-SS0D87F8BD7	simple:P01270	simple:P49190	ENSG00000152266	ENSG00000144407	InnateDB-All	TRUE	FALSE	0.0 | 1.0	0.0 | 1.0	0.002 | 1.0	0.0 | 1.0	0.0 | 1.0	0.0 | 1.0	0.0 | 1.0	0.0 | 1.0	0.0 | 1.0	0.0 | 1.0	0.0 | 1.0	0.0 | 1.0	0.0 | 1.0	0.0 | 1.0	0.0 | 1.0	0.0 | 1.0	0.0 | 1.0	0.0 | 1.0	0.0 | 1.0	0.0 | 1.0	0.0 | 1.0	0.0 | 1.0	0.0 | 1.0	0.0 | 1.0	0.0 | 1.0
KNG1_BDKRB1	CPI-SS075D9B9AD	simple:P01042	simple:P46663	ENSG00000113889	ENSG00000100739	guidetopharmacology.org	TRUE	FALSE	0.0 | 1.0	0.005 | 1.0	0.0 | 1.0	0.0 | 1.0	0.0 | 1.0	0.003 | 1.0	0.001 | 1.0	0.0 | 1.0	0.0 | 1.0	0.0 | 1.0	0.0 | 1.0	0.0 | 1.0	0.0 | 1.0	0.0 | 1.0	0.0 | 1.0	0.0 | 1.0	0.004 | 1.0	0.002 | 1.0	0.0 | 1.0	0.004 | 1.0	0.0 | 1.0	0.0 | 1.0	0.0 | 1.0	0.007 | 1.0	0.005 | 1.0
NPR3_NPPA	CPI-SS04F79F446	simple:P17342	simple:P01160	ENSG00000113389	ENSG00000175206	InnateDB-All	TRUE	FALSE	0.0 | 1.0	0.0 | 1.0	0.0 | 1.0	0.0 | 1.0	0.0 | 1.0	0.0 | 1.0	0.0 | 1.0	0.0 | 1.0	0.0 | 1.0	0.0 | 1.0	0.0 | 1.0	0.0 | 1.0	0.0 | 1.0	0.0 | 1.0	0.0 | 1.0	0.0 | 1.0	0.0 | 1.0	0.0 | 1.0	0.0 | 1.0	0.0 | 1.0	0.0 | 1.0	0.0 | 1.0	0.0 | 1.0	0.0 | 1.0	0.0 | 1.0
NPR2_NPPA	CPI-SS05172DAA1	simple:P20594	simple:P01160	ENSG00000159899	ENSG00000175206	InnateDB-All	TRUE	FALSE	0.0 | 1.0	0.0 | 1.0	0.0 | 1.0	0.0 | 1.0	0.0 | 1.0	0.0 | 1.0	0.0 | 1.0	0.0 | 1.0	0.0 | 1.0	0.0 | 1.0	0.0 | 1.0	0.0 | 1.0	0.0 | 1.0	0.0 | 1.0	0.0 | 1.0	0.0 | 1.0	0.0 | 1.0	0.0 | 1.0	0.0 | 1.0	0.0 | 1.0	0.0 | 1.0	0.0 | 1.0	0.0 | 1.0	0.0 | 1.0	0.0 | 1.0
UCN2_CRHR2	CPI-SS0EDEEE57E	simple:Q96RP3	simple:Q13324	ENSG00000145040	ENSG00000106113	guidetopharmacology.org	TRUE	FALSE	0.005 | 1.0	0.007 | 1.0	0.0 | 1.0	0.013 | 1.0	0.013 | 1.0	0.014 | 1.0	0.012 | 1.0	0.004 | 1.0	0.004 | 1.0	0.005 | 1.0	0.003 | 1.0	0.004 | 1.0	0.006 | 1.0	0.0 | 1.0	0.0 | 1.0	0.0 | 1.0	0.0 | 1.0	0.0 | 1.0	0.0 | 1.0	0.0 | 1.0	0.0 | 1.0	0.002 | 1.0	0.002 | 1.0	0.004 | 1.0	0.002 | 1.0
ANXA1_FPR1	CPI-SS0F739D3DB	simple:P04083	simple:P21462	ENSG00000135046	ENSG00000171051	guidetopharmacology.org	TRUE	FALSE	0.181 | 1.0	0.0 | 1.0	0.0 | 1.0	0.0 | 1.0	0.144 | 1.0	0.0 | 1.0	0.0 | 1.0	0.0 | 1.0	1.572 | 1.0	0.0 | 1.0	0.0 | 1.0	1.586 | 1.0	0.0 | 1.0	0.0 | 1.0	0.0 | 1.0	0.145 | 1.0	0.0 | 1.0	0.0 | 1.0	0.15 | 1.0	0.0 | 1.0	0.0 | 1.0	0.0 | 1.0	0.111 | 1.0	0.0 | 1.0	0.0 | 1.0
ANXA1_FPR3	CPI-SS06CCF5A54	simple:P04083	simple:P25089	ENSG00000135046	ENSG00000187474	guidetopharmacology.org	TRUE	FALSE	0.197 | 1.0	0.201 | 1.0	0.189 | 1.0	0.158 | 1.0	0.161 | 1.0	0.159 | 1.0	0.153 | 1.0	1.585 | 1.0	1.589 | 1.0	1.587 | 1.0	1.581 | 1.0	1.601 | 1.0	1.606 | 1.0	1.593 | 1.0	0.159 | 1.0	0.162 | 1.0	0.16 | 1.0	0.154 | 1.0	0.166 | 1.0	0.17 | 1.0	0.158 | 1.0	0.125 | 1.0	0.129 | 1.0	0.126 | 1.0	0.12 | 1.0
HEBP1_FPR3	CPI-SS0EEECE1C4	simple:Q9NRV9	simple:P25089	ENSG00000013583	ENSG00000187474	guidetopharmacology.org	FALSE	FALSE	0.036 | 1.0	0.04 | 1.0	0.028 | 1.0	0.046 | 1.0	0.05 | 1.0	0.047 | 1.0	0.041 | 1.0	0.057 | 1.0	0.061 | 1.0	0.058 | 1.0	0.053 | 1.0	0.049 | 1.0	0.054 | 1.0	0.042 | 1.0	0.04 | 1.0	0.044 | 1.0	0.042 | 1.0	0.036 | 1.0	0.037 | 1.0	0.042 | 1.0	0.029 | 1.0	0.041 | 1.0	0.045 | 1.0	0.042 | 1.0	0.037 | 1.0
WNT1_CD36	CPI-SS0EB136379	simple:P04628	simple:P16671	ENSG00000125084	ENSG00000135218	InnateDB	TRUE	FALSE	0.0 | 1.0	0.0 | 1.0	0.0 | 1.0	0.004 | 1.0	0.0 | 1.0	0.003 | 1.0	0.004 | 1.0	0.0 | 1.0	0.0 | 1.0	0.0 | 1.0	0.0 | 1.0	0.0 | 1.0	0.0 | 1.0	0.0 | 1.0	0.0 | 1.0	0.0 | 1.0	0.0 | 1.0	0.0 | 1.0	0.005 | 1.0	0.005 | 1.0	0.002 | 1.0	0.004 | 1.0	0.0 | 1.0	0.003 | 1.0	0.004 | 1.0
WNT1_ROR2	CPI-SS00A6240B6	simple:P04628	simple:Q01974	ENSG00000125084	ENSG00000169071	InnateDB-All	TRUE	FALSE	0.0 | 1.0	0.0 | 1.0	0.0 | 1.0	0.025 | 1.0	0.043 | 1.0	0.059 | 1.0	0.026 | 1.0	0.0 | 1.0	0.0 | 1.0	0.0 | 1.0	0.0 | 1.0	0.0 | 1.0	0.0 | 1.0	0.0 | 1.0	0.0 | 1.0	0.0 | 1.0	0.0 | 1.0	0.0 | 1.0	0.056 | 1.0	0.018 | 1.0	0.065 | 1.0	0.025 | 1.0	0.043 | 1.0	0.058 | 1.0	0.026 | 1.0
WNT1_FZD1	CPI-SS0DC5ADBF1	simple:P04628	simple:Q9UP38	ENSG00000125084	ENSG00000157240	curated	TRUE	FALSE	0.0 | 1.0	0.0 | 1.0	0.0 | 1.0	0.158 | 1.0	0.17 | 1.0	0.227 | 1.0	0.12 | 1.0	0.0 | 1.0	0.0 | 1.0	0.0 | 1.0	0.0 | 1.0	0.0 | 1.0	0.0 | 1.0	0.0 | 1.0	0.0 | 1.0	0.0 | 1.0	0.0 | 1.0	0.0 | 1.0	0.296 | 1.0	0.136 | 1.0	0.219 | 1.0	0.158 | 1.0	0.17 | 1.0	0.227 | 1.0	0.12 | 1.0
WNT7B_FZD1	CPI-SS0D81C6C1D	simple:P56706	simple:Q9UP38	ENSG00000188064	ENSG00000157240	curated	TRUE	FALSE	0.297 | 1.0	0.137 | 1.0	0.22 | 1.0	0.16 | 1.0	0.172 | 1.0	0.229 | 1.0	0.121 | 1.0	0.193 | 1.0	0.205 | 1.0	0.262 | 1.0	0.155 | 1.0	0.341 | 1.0	0.18 | 1.0	0.264 | 1.0	0.0 | 1.0	0.0 | 1.0	0.0 | 1.0	0.0 | 1.0	0.296 | 1.0	0.136 | 1.0	0.219 | 1.0	0.16 | 1.0	0.172 | 1.0	0.229 | 1.0	0.121 | 1.0
NGFR_TTR	CPI-SS06669C0C8	simple:P08138	simple:P02766	ENSG00000064300	ENSG00000118271	MINT	TRUE	FALSE	0.222 | 1.0	0.0 | 1.0	0.0 | 1.0	0.0 | 1.0	0.022 | 1.0	0.0 | 1.0	0.0 | 1.0	0.0 | 1.0	0.006 | 1.0	0.0 | 1.0	0.0 | 1.0	0.013 | 1.0	0.0 | 1.0	0.0 | 1.0	0.0 | 1.0	0.08 | 1.0	0.0 | 1.0	0.0 | 1.0	0.12 | 1.0	0.0 | 1.0	0.0 | 1.0	0.0 | 1.0	0.029 | 1.0	0.0 | 1.0	0.0 | 1.0
EFNB1_EPHB1	CPI-SS03C7D1520	simple:P98172	simple:P54762	ENSG00000090776	ENSG00000154928	curated	FALSE	FALSE	0.101 | 1.0	0.09 | 1.0	0.091 | 1.0	0.131 | 1.0	0.0 | 1.0	0.12 | 1.0	0.12 | 1.0	0.066 | 1.0	0.0 | 1.0	0.055 | 1.0	0.056 | 1.0	0.075 | 1.0	0.064 | 1.0	0.065 | 1.0	0.135 | 1.0	0.0 | 1.0	0.123 | 1.0	0.124 | 1.0	0.183 | 1.0	0.172 | 1.0	0.173 | 1.0	0.124 | 1.0	0.0 | 1.0	0.113 | 1.0	0.113 | 1.0
EFNB2_EPHB1	CPI-SS0BFD8E056	simple:P52799	simple:P54762	ENSG00000125266	ENSG00000154928	curated	FALSE	FALSE	0.047 | 1.0	0.036 | 1.0	0.037 | 1.0	0.09 | 1.0	0.0 | 1.0	0.079 | 1.0	0.079 | 1.0	0.527 | 1.0	0.0 | 1.0	0.516 | 1.0	0.517 | 1.0	0.478 | 1.0	0.467 | 1.0	0.468 | 1.0	0.066 | 1.0	0.0 | 1.0	0.055 | 1.0	0.055 | 1.0	0.042 | 1.0	0.031 | 1.0	0.032 | 1.0	0.063 | 1.0	0.0 | 1.0	0.052 | 1.0	0.053 | 1.0
EFNB3_EPHB1	CPI-SS0CE96B837	simple:Q15768	simple:P54762	ENSG00000108947	ENSG00000154928	curated	FALSE	FALSE	0.055 | 1.0	0.044 | 1.0	0.045 | 1.0	0.045 | 1.0	0.0 | 1.0	0.034 | 1.0	0.035 | 1.0	0.024 | 1.0	0.0 | 1.0	0.012 | 1.0	0.013 | 1.0	0.03 | 1.0	0.019 | 1.0	0.02 | 1.0	0.045 | 1.0	0.0 | 1.0	0.034 | 1.0	0.035 | 1.0	0.033 | 1.0	0.022 | 1.0	0.023 | 1.0	0.05 | 1.0	0.0 | 1.0	0.039 | 1.0	0.04 | 1.0
EFNB1_EPHB3	CPI-SS0C2003B74	simple:P98172	simple:P54753	ENSG00000090776	ENSG00000182580	curated	FALSE	FALSE	0.102 | 1.0	0.094 | 1.0	0.112 | 1.0	0.128 | 1.0	0.133 | 1.0	0.143 | 1.0	0.128 | 1.0	0.063 | 1.0	0.068 | 1.0	0.078 | 1.0	0.063 | 1.0	0.076 | 1.0	0.068 | 1.0	0.086 | 1.0	0.132 | 1.0	0.137 | 1.0	0.147 | 1.0	0.132 | 1.0	0.184 | 1.0	0.176 | 1.0	0.194 | 1.0	0.121 | 1.0	0.126 | 1.0	0.136 | 1.0	0.121 | 1.0
EFNB2_EPHB3	CPI-SS082ABF1EA	simple:P52799	simple:P54753	ENSG00000125266	ENSG00000182580	curated	FALSE	FALSE	0.048 | 1.0	0.04 | 1.0	0.058 | 1.0	0.087 | 1.0	0.092 | 1.0	0.102 | 1.0	0.087 | 1.0	0.524 | 1.0	0.53 | 1.0	0.54 | 1.0	0.524 | 1.0	0.479 | 1.0	0.471 | 1.0	0.489 | 1.0	0.063 | 1.0	0.068 | 1.0	0.078 | 1.0	0.063 | 1.0	0.043 | 1.0	0.035 | 1.0	0.053 | 1.0	0.06 | 1.0	0.065 | 1.0	0.075 | 1.0	0.06 | 1.0
EFNB3_EPHB3	CPI-SS01BBAD475	simple:Q15768	simple:P54753	ENSG00000108947	ENSG00000182580	curated	FALSE	FALSE	0.057 | 1.0	0.049 | 1.0	0.066 | 1.0	0.042 | 1.0	0.048 | 1.0	0.057 | 1.0	0.042 | 1.0	0.02 | 1.0	0.026 | 1.0	0.036 | 1.0	0.021 | 1.0	0.031 | 1.0	0.023 | 1.0	0.041 | 1.0	0.042 | 1.0	0.047 | 1.0	0.057 | 1.0	0.042 | 1.0	0.034 | 1.0	0.026 | 1.0	0.044 | 1.0	0.047 | 1.0	0.053 | 1.0	0.062 | 1.0	0.047 | 1.0
EFNB1_EPHB6	CPI-SS040D3C47C	simple:P98172	simple:O15197	ENSG00000090776	ENSG00000106123	curated	TRUE	FALSE	0.094 | 1.0	0.107 | 1.0	0.091 | 1.0	0.133 | 1.0	0.14 | 1.0	0.125 | 1.0	0.136 | 1.0	0.068 | 1.0	0.075 | 1.0	0.06 | 1.0	0.071 | 1.0	0.068 | 1.0	0.081 | 1.0	0.065 | 1.0	0.137 | 1.0	0.144 | 1.0	0.128 | 1.0	0.14 | 1.0	0.176 | 1.0	0.189 | 1.0	0.173 | 1.0	0.126 | 1.0	0.133 | 1.0	0.118 | 1.0	0.129 | 1.0
EFNB2_EPHB6	CPI-SS05ABE6795	simple:P52799	simple:O15197	ENSG00000125266	ENSG00000106123	curated	TRUE	FALSE	0.04 | 1.0	0.053 | 1.0	0.037 | 1.0	0.092 | 1.0	0.099 | 1.0	0.084 | 1.0	0.095 | 1.0	0.53 | 1.0	0.537 | 1.0	0.521 | 1.0	0.532 | 1.0	0.471 | 1.0	0.483 | 1.0	0.468 | 1.0	0.068 | 1.0	0.075 | 1.0	0.06 | 1.0	0.071 | 1.0	0.035 | 1.0	0.048 | 1.0	0.032 | 1.0	0.065 | 1.0	0.072 | 1.0	0.057 | 1.0	0.068 | 1.0
EFNB3_EPHB6	CPI-SS0A39F4895	simple:Q15768	simple:O15197	ENSG00000108947	ENSG00000106123	curated	TRUE	FALSE	0.048 | 1.0	0.061 | 1.0	0.045 | 1.0	0.048 | 1.0	0.054 | 1.0	0.039 | 1.0	0.05 | 1.0	0.026 | 1.0	0.033 | 1.0	0.017 | 1.0	0.029 | 1.0	0.023 | 1.0	0.035 | 1.0	0.02 | 1.0	0.047 | 1.0	0.054 | 1.0	0.039 | 1.0	0.05 | 1.0	0.026 | 1.0	0.038 | 1.0	0.023 | 1.0	0.053 | 1.0	0.059 | 1.0	0.044 | 1.0	0.055 | 1.0
EFNB1_EPHB2	CPI-SS06E797E50	simple:P98172	simple:P29323	ENSG00000090776	ENSG00000133216	curated	FALSE	FALSE	0.116 | 1.0	0.142 | 1.0	0.122 | 1.0	0.159 | 1.0	0.218 | 0.0	0.164 | 1.0	0.156 | 1.0	0.094 | 1.0	0.153 | 1.0	0.099 | 1.0	0.091 | 1.0	0.09 | 1.0	0.116 | 1.0	0.097 | 1.0	0.163 | 1.0	0.222 | 0.0	0.168 | 1.0	0.16 | 1.0	0.198 | 1.0	0.224 | 1.0	0.205 | 1.0	0.152 | 1.0	0.211 | 0.0	0.157 | 1.0	0.149 | 1.0
EFNB2_EPHB2	CPI-SS0ECC9DF3E	simple:P52799	simple:P29323	ENSG00000125266	ENSG00000133216	curated	FALSE	FALSE	0.062 | 1.0	0.088 | 1.0	0.069 | 1.0	0.118 | 1.0	0.177 | 1.0	0.123 | 1.0	0.115 | 1.0	0.555 | 1.0	0.614 | 0.0	0.56 | 1.0	0.552 | 1.0	0.493 | 1.0	0.519 | 1.0	0.499 | 1.0	0.094 | 1.0	0.153 | 1.0	0.099 | 1.0	0.091 | 1.0	0.057 | 1.0	0.083 | 1.0	0.064 | 1.0	0.091 | 1.0	0.15 | 1.0	0.096 | 1.0	0.088 | 1.0
EFNB3_EPHB2	CPI-SS0ECCB4382	simple:Q15768	simple:P29323	ENSG00000108947	ENSG00000133216	curated	FALSE	FALSE	0.07 | 1.0	0.096 | 1.0	0.077 | 1.0	0.073 | 1.0	0.132 | 1.0	0.078 | 1.0	0.07 | 1.0	0.051 | 1.0	0.11 | 1.0	0.057 | 1.0	0.048 | 1.0	0.044 | 1.0	0.071 | 1.0	0.051 | 1.0	0.073 | 1.0	0.132 | 1.0	0.078 | 1.0	0.07 | 1.0	0.048 | 1.0	0.074 | 1.0	0.054 | 1.0	0.078 | 1.0	0.137 | 1.0	0.083 | 1.0	0.075 | 1.0
EFNB2_EPO	CPI-SS034D095EE	simple:P52799	simple:P01588	ENSG00000125266	ENSG00000130427	IntAct	TRUE	FALSE	0.033 | 1.0	0.0 | 1.0	0.0 | 1.0	0.078 | 1.0	0.0 | 1.0	0.0 | 1.0	0.079 | 1.0	0.516 | 1.0	0.0 | 1.0	0.0 | 1.0	0.516 | 1.0	0.464 | 1.0	0.0 | 1.0	0.0 | 1.0	0.054 | 1.0	0.0 | 1.0	0.0 | 1.0	0.055 | 1.0	0.028 | 1.0	0.0 | 1.0	0.0 | 1.0	0.051 | 1.0	0.0 | 1.0	0.0 | 1.0	0.052 | 1.0
F11R_BDNF	CPI-SS0D01E21D9	simple:Q9Y624	simple:P23560	ENSG00000158769	ENSG00000176697	IntAct	TRUE	FALSE	0.018 | 1.0	0.018 | 1.0	0.032 | 1.0	0.007 | 1.0	0.011 | 1.0	0.02 | 1.0	0.013 | 1.0	0.181 | 1.0	0.185 | 1.0	0.195 | 1.0	0.187 | 1.0	0.132 | 1.0	0.133 | 1.0	0.146 | 1.0	0.007 | 1.0	0.011 | 1.0	0.021 | 1.0	0.013 | 1.0	0.01 | 1.0	0.01 | 1.0	0.024 | 1.0	0.008 | 1.0	0.011 | 1.0	0.021 | 1.0	0.013 | 1.0
LILRB4_LAIR1	CPI-SS0C8D6BD62	simple:Q8NHJ6	simple:Q6GTX8	ENSG00000186818	ENSG00000167613	curated	FALSE	FALSE	0.006 | 1.0	0.0 | 1.0	0.0 | 1.0	0.006 | 1.0	0.006 | 1.0	0.0 | 1.0	0.006 | 1.0	0.006 | 1.0	0.006 | 1.0	0.0 | 1.0	0.006 | 1.0	0.007 | 1.0	0.0 | 1.0	0.0 | 1.0	0.004 | 1.0	0.004 | 1.0	0.0 | 1.0	0.004 | 1.0	0.004 | 1.0	0.0 | 1.0	0.0 | 1.0	0.002 | 1.0	0.003 | 1.0	0.0 | 1.0	0.003 | 1.0
RLN2_RXFP1	CPI-SS045EC4F7D	simple:P04090	simple:Q9HBX9	ENSG00000107014	ENSG00000171509	guidetopharmacology.org	TRUE	FALSE	0.209 | 1.0	0.044 | 1.0	0.126 | 1.0	0.035 | 1.0	0.028 | 1.0	0.104 | 1.0	0.122 | 1.0	0.0 | 1.0	0.0 | 1.0	0.0 | 1.0	0.0 | 1.0	0.0 | 1.0	0.0 | 1.0	0.0 | 1.0	0.0 | 1.0	0.0 | 1.0	0.0 | 1.0	0.0 | 1.0	0.209 | 1.0	0.045 | 1.0	0.126 | 1.0	0.0 | 1.0	0.0 | 1.0	0.0 | 1.0	0.0 | 1.0
RLN3_RXFP1	CPI-SS031E35270	simple:Q8WXF3	simple:Q9HBX9	ENSG00000171136	ENSG00000171509	guidetopharmacology.org	TRUE	FALSE	0.0 | 1.0	0.0 | 1.0	0.0 | 1.0	0.0 | 1.0	0.0 | 1.0	0.0 | 1.0	0.0 | 1.0	0.0 | 1.0	0.0 | 1.0	0.0 | 1.0	0.0 | 1.0	0.0 | 1.0	0.0 | 1.0	0.0 | 1.0	0.035 | 1.0	0.028 | 1.0	0.104 | 1.0	0.122 | 1.0	0.0 | 1.0	0.0 | 1.0	0.0 | 1.0	0.0 | 1.0	0.0 | 1.0	0.0 | 1.0	0.0 | 1.0
RLF_RXFP1	CPI-SS08805BBC2	simple:P51460	simple:Q9HBX9	ENSG00000117000	ENSG00000171509	guidetopharmacology.org	TRUE	FALSE	0.251 | 1.0	0.086 | 1.0	0.168 | 1.0	0.075 | 1.0	0.067 | 1.0	0.143 | 1.0	0.162 | 1.0	0.083 | 1.0	0.076 | 1.0	0.152 | 1.0	0.17 | 1.0	0.277 | 1.0	0.112 | 1.0	0.194 | 1.0	0.074 | 1.0	0.067 | 1.0	0.143 | 1.0	0.161 | 1.0	0.25 | 1.0	0.085 | 1.0	0.167 | 1.0	0.079 | 1.0	0.072 | 1.0	0.148 | 1.0	0.166 | 1.0
RLN1_RXFP1	CPI-SS0FAE75A75	simple:P04808	simple:Q9HBX9	ENSG00000107018	ENSG00000171509	guidetopharmacology.org	TRUE	FALSE	0.209 | 1.0	0.044 | 1.0	0.126 | 1.0	0.035 | 1.0	0.028 | 1.0	0.104 | 1.0	0.122 | 1.0	0.0 | 1.0	0.0 | 1.0	0.0 | 1.0	0.0 | 1.0	0.0 | 1.0	0.0 | 1.0	0.0 | 1.0	0.0 | 1.0	0.0 | 1.0	0.0 | 1.0	0.0 | 1.0	0.209 | 1.0	0.045 | 1.0	0.126 | 1.0	0.0 | 1.0	0.0 | 1.0	0.0 | 1.0	0.0 | 1.0
RLN2_RXFP2	CPI-SS018FB4D9F	simple:P04090	simple:Q8WXD0	ENSG00000107014	ENSG00000133105	guidetopharmacology.org	TRUE	FALSE	0.0 | 1.0	0.0 | 1.0	0.003 | 1.0	0.004 | 1.0	0.0 | 1.0	0.003 | 1.0	0.001 | 1.0	0.0 | 1.0	0.0 | 1.0	0.0 | 1.0	0.0 | 1.0	0.0 | 1.0	0.0 | 1.0	0.0 | 1.0	0.0 | 1.0	0.0 | 1.0	0.0 | 1.0	0.0 | 1.0	0.0 | 1.0	0.0 | 1.0	0.003 | 1.0	0.0 | 1.0	0.0 | 1.0	0.0 | 1.0	0.0 | 1.0
RLN3_RXFP2	CPI-SS02754C0EA	simple:Q8WXF3	simple:Q8WXD0	ENSG00000171136	ENSG00000133105	guidetopharmacology.org	TRUE	FALSE	0.0 | 1.0	0.0 | 1.0	0.0 | 1.0	0.0 | 1.0	0.0 | 1.0	0.0 | 1.0	0.0 | 1.0	0.0 | 1.0	0.0 | 1.0	0.0 | 1.0	0.0 | 1.0	0.0 | 1.0	0.0 | 1.0	0.0 | 1.0	0.004 | 1.0	0.0 | 1.0	0.003 | 1.0	0.001 | 1.0	0.0 | 1.0	0.0 | 1.0	0.0 | 1.0	0.0 | 1.0	0.0 | 1.0	0.0 | 1.0	0.0 | 1.0
RLF_RXFP2	CPI-SS06CF55F94	simple:P51460	simple:Q8WXD0	ENSG00000117000	ENSG00000133105	guidetopharmacology.org	TRUE	FALSE	0.0 | 1.0	0.0 | 1.0	0.044 | 1.0	0.043 | 1.0	0.0 | 1.0	0.042 | 1.0	0.041 | 1.0	0.052 | 1.0	0.0 | 1.0	0.051 | 1.0	0.049 | 1.0	0.0 | 1.0	0.0 | 1.0	0.071 | 1.0	0.043 | 1.0	0.0 | 1.0	0.042 | 1.0	0.04 | 1.0	0.0 | 1.0	0.0 | 1.0	0.044 | 1.0	0.048 | 1.0	0.0 | 1.0	0.047 | 1.0	0.046 | 1.0
RLN1_RXFP2	CPI-SS0D3A5646A	simple:P04808	simple:Q8WXD0	ENSG00000107018	ENSG00000133105	guidetopharmacology.org	TRUE	FALSE	0.0 | 1.0	0.0 | 1.0	0.003 | 1.0	0.004 | 1.0	0.0 | 1.0	0.003 | 1.0	0.001 | 1.0	0.0 | 1.0	0.0 | 1.0	0.0 | 1.0	0.0 | 1.0	0.0 | 1.0	0.0 | 1.0	0.0 | 1.0	0.0 | 1.0	0.0 | 1.0	0.0 | 1.0	0.0 | 1.0	0.0 | 1.0	0.0 | 1.0	0.003 | 1.0	0.0 | 1.0	0.0 | 1.0	0.0 | 1.0	0.0 | 1.0
GAS6_AXL	CPI-SS0AE964947	simple:Q14393	simple:P30530	ENSG00000183087	ENSG00000167601	guidetopharmacology.org	TRUE	FALSE	0.055 | 1.0	0.019 | 1.0	0.192 | 1.0	0.138 | 1.0	0.031 | 1.0	0.213 | 1.0	0.13 | 1.0	0.136 | 1.0	0.028 | 1.0	0.211 | 1.0	0.127 | 1.0	0.061 | 1.0	0.025 | 1.0	0.197 | 1.0	0.216 | 1.0	0.109 | 1.0	0.291 | 1.0	0.208 | 1.0	0.12 | 1.0	0.085 | 1.0	0.257 | 1.0	0.187 | 1.0	0.08 | 1.0	0.262 | 1.0	0.179 | 1.0
PROS1_AXL	CPI-SS0C85BC9AF	simple:P07225	simple:P30530	ENSG00000184500	ENSG00000167601	guidetopharmacology.org	TRUE	FALSE	0.221 | 1.0	0.185 | 1.0	0.357 | 0.0	0.326 | 0.0	0.219 | 1.0	0.401 | 0.0	0.318 | 0.0	0.164 | 1.0	0.056 | 1.0	0.239 | 1.0	0.155 | 1.0	0.085 | 1.0	0.05 | 1.0	0.222 | 1.0	0.268 | 0.284	0.16 | 1.0	0.343 | 0.0	0.259 | 0.445	0.221 | 1.0	0.186 | 1.0	0.358 | 0.0	0.284 | 0.016	0.176 | 1.0	0.359 | 0.0	0.275 | 0.068
GAS6_MERTK	CPI-SS0F7FF099C	simple:Q14393	simple:Q12866	ENSG00000183087	ENSG00000153208	guidetopharmacology.org	TRUE	FALSE	0.02 | 1.0	0.017 | 1.0	0.019 | 1.0	0.023 | 1.0	0.019 | 1.0	0.018 | 1.0	0.029 | 1.0	0.021 | 1.0	0.017 | 1.0	0.016 | 1.0	0.027 | 1.0	0.025 | 1.0	0.023 | 1.0	0.025 | 1.0	0.101 | 1.0	0.097 | 1.0	0.096 | 1.0	0.107 | 1.0	0.085 | 1.0	0.082 | 1.0	0.085 | 1.0	0.072 | 1.0	0.068 | 1.0	0.067 | 1.0	0.078 | 1.0
GAS6_TYRO3	CPI-SS0BDA0E5E0	simple:Q14393	simple:Q06418	ENSG00000183087	ENSG00000092445	guidetopharmacology.org	TRUE	FALSE	0.021 | 1.0	0.086 | 1.0	0.035 | 1.0	0.033 | 1.0	0.108 | 1.0	0.041 | 1.0	0.05 | 1.0	0.031 | 1.0	0.106 | 1.0	0.038 | 1.0	0.048 | 1.0	0.026 | 1.0	0.091 | 1.0	0.041 | 1.0	0.111 | 1.0	0.186 | 1.0	0.118 | 1.0	0.128 | 1.0	0.086 | 1.0	0.151 | 1.0	0.1 | 1.0	0.082 | 1.0	0.157 | 1.0	0.089 | 1.0	0.099 | 1.0
PROS1_TYRO3	CPI-SS09C4988F8	simple:P07225	simple:Q06418	ENSG00000184500	ENSG00000092445	guidetopharmacology.org	TRUE	FALSE	0.186 | 1.0	0.251 | 1.0	0.201 | 1.0	0.221 | 1.0	0.296 | 0.0	0.228 | 1.0	0.238 | 1.0	0.059 | 1.0	0.134 | 1.0	0.066 | 1.0	0.076 | 1.0	0.051 | 1.0	0.116 | 1.0	0.065 | 1.0	0.163 | 1.0	0.238 | 0.0	0.17 | 1.0	0.18 | 1.0	0.187 | 1.0	0.252 | 1.0	0.201 | 1.0	0.178 | 1.0	0.254 | 0.0	0.186 | 1.0	0.195 | 1.0
PTN_ALK	CPI-SS05D7900BF	simple:P21246	simple:Q9UM73	ENSG00000105894	ENSG00000171094	curated	TRUE	FALSE	2.324 | 1.0	2.325 | 1.0	0.0 | 1.0	0.907 | 1.0	0.907 | 1.0	0.0 | 1.0	0.907 | 1.0	1.654 | 1.0	1.654 | 1.0	0.0 | 1.0	1.654 | 1.0	1.103 | 1.0	1.104 | 1.0	0.0 | 1.0	3.734 | 1.0	3.733 | 1.0	0.0 | 1.0	3.733 | 1.0	4.355 | 1.0	4.356 | 1.0	0.0 | 1.0	1.334 | 1.0	1.334 | 1.0	0.0 | 1.0	1.334 | 1.0
MDK_ALK	CPI-SS012AFC842	simple:P21741	simple:Q9UM73	ENSG00000110492	ENSG00000171094	curated	TRUE	FALSE	1.352 | 1.0	1.352 | 1.0	0.0 | 1.0	0.956 | 1.0	0.956 | 1.0	0.0 | 1.0	0.956 | 1.0	2.334 | 1.0	2.334 | 1.0	0.0 | 1.0	2.334 | 1.0	1.099 | 1.0	1.1 | 1.0	0.0 | 1.0	0.818 | 1.0	0.818 | 1.0	0.0 | 1.0	0.818 | 1.0	0.809 | 1.0	0.809 | 1.0	0.0 | 1.0	0.63 | 1.0	0.63 | 1.0	0.0 | 1.0	0.63 | 1.0
PTN_PLXNB2	CPI-SS07F2369F1	simple:P21246	simple:O15031	ENSG00000105894	ENSG00000196576	IntAct	TRUE	FALSE	2.433 | 0.0	2.684 | 0.0	2.459 | 0.0	1.033 | 1.0	1.33 | 1.0	1.026 | 1.0	1.026 | 1.0	1.78 | 1.0	2.077 | 0.877	1.773 | 1.0	1.773 | 1.0	1.211 | 1.0	1.463 | 1.0	1.237 | 1.0	3.859 | 0.0	4.156 | 0.0	3.852 | 0.0	3.852 | 0.0	4.464 | 0.0	4.715 | 0.0	4.49 | 0.0	1.46 | 1.0	1.757 | 1.0	1.453 | 1.0	1.453 | 1.0
SEMA4D_PLXNB2	CPI-SS012F60F11	simple:Q92854	simple:O15031	ENSG00000187764	ENSG00000196576	curated	FALSE	FALSE	0.114 | 1.0	0.365 | 1.0	0.14 | 1.0	0.13 | 1.0	0.427 | 1.0	0.122 | 1.0	0.123 | 1.0	0.131 | 1.0	0.428 | 1.0	0.124 | 1.0	0.124 | 1.0	0.112 | 1.0	0.363 | 1.0	0.138 | 1.0	0.128 | 1.0	0.425 | 1.0	0.121 | 1.0	0.121 | 1.0	0.113 | 1.0	0.364 | 1.0	0.139 | 1.0	0.129 | 1.0	0.426 | 1.0	0.122 | 1.0	0.122 | 1.0
SEMA4C_PLXNB2	CPI-SS0892F3080	simple:Q9C0C4	simple:O15031	ENSG00000168758	ENSG00000196576	curated	FALSE	FALSE	0.183 | 1.0	0.434 | 1.0	0.209 | 1.0	0.171 | 1.0	0.468 | 1.0	0.164 | 1.0	0.164 | 1.0	0.225 | 0.646	0.522 | 0.0	0.218 | 0.869	0.218 | 0.866	0.214 | 0.798	0.465 | 0.0	0.239 | 0.351	0.185 | 1.0	0.482 | 1.0	0.178 | 1.0	0.178 | 1.0	0.192 | 1.0	0.443 | 1.0	0.218 | 1.0	0.169 | 1.0	0.466 | 1.0	0.162 | 1.0	0.162 | 1.0
SEMA4G_PLXNB2	CPI-SS011931B0F	simple:Q9NTN9	simple:O15031	ENSG00000095539	ENSG00000196576	curated	FALSE	FALSE	0.114 | 1.0	0.365 | 1.0	0.14 | 1.0	0.132 | 1.0	0.429 | 1.0	0.125 | 1.0	0.125 | 1.0	0.129 | 1.0	0.426 | 1.0	0.122 | 1.0	0.122 | 1.0	0.0 | 1.0	0.0 | 1.0	0.0 | 1.0	0.131 | 1.0	0.428 | 1.0	0.123 | 1.0	0.124 | 1.0	0.111 | 1.0	0.362 | 1.0	0.137 | 1.0	0.132 | 1.0	0.429 | 1.0	0.125 | 1.0	0.125 | 1.0
PTN_PTPRS	CPI-SS00F4DDF4B	simple:P21246	simple:Q13332	ENSG00000105894	ENSG00000105426	IntAct	TRUE	FALSE	2.336 | 1.0	2.331 | 1.0	2.334 | 1.0	0.909 | 1.0	0.933 | 1.0	0.911 | 1.0	0.911 | 1.0	1.656 | 1.0	1.68 | 1.0	1.658 | 1.0	1.658 | 1.0	1.115 | 1.0	1.11 | 1.0	1.113 | 1.0	3.735 | 1.0	3.759 | 1.0	3.737 | 1.0	3.737 | 1.0	4.367 | 1.0	4.362 | 1.0	4.365 | 1.0	1.336 | 1.0	1.36 | 1.0	1.338 | 1.0	1.338 | 1.0
HGF_MET	CPI-SS0109FE6AE	simple:P14210	simple:P08581	ENSG00000019991	ENSG00000105976	curated	TRUE	FALSE	0.012 | 1.0	0.019 | 1.0	0.0 | 1.0	0.055 | 1.0	0.0 | 1.0	0.054 | 1.0	0.054 | 1.0	0.011 | 1.0	0.0 | 1.0	0.011 | 1.0	0.01 | 1.0	0.009 | 1.0	0.017 | 1.0	0.0 | 1.0	0.011 | 1.0	0.0 | 1.0	0.011 | 1.0	0.01 | 1.0	0.018 | 1.0	0.025 | 1.0	0.0 | 1.0	0.046 | 1.0	0.0 | 1.0	0.046 | 1.0	0.046 | 1.0
CD80_CTLA4	CPI-SS08EC6823D	simple:P33681	simple:P16410	ENSG00000121594	ENSG00000163599	curated	FALSE	FALSE	0.007 | 1.0	0.0 | 1.0	0.007 | 1.0	0.002 | 1.0	0.0 | 1.0	0.004 | 1.0	0.002 | 1.0	0.004 | 1.0	0.0 | 1.0	0.005 | 1.0	0.004 | 1.0	0.005 | 1.0	0.0 | 1.0	0.005 | 1.0	0.002 | 1.0	0.0 | 1.0	0.004 | 1.0	0.002 | 1.0	0.002 | 1.0	0.0 | 1.0	0.002 | 1.0	0.002 | 1.0	0.0 | 1.0	0.004 | 1.0	0.002 | 1.0
CD86_CTLA4	CPI-SS0A72C2360	simple:P42081	simple:P16410	ENSG00000114013	ENSG00000163599	curated	FALSE	FALSE	0.036 | 1.0	0.0 | 1.0	0.036 | 1.0	0.007 | 1.0	0.0 | 1.0	0.009 | 1.0	0.008 | 1.0	0.007 | 1.0	0.0 | 1.0	0.009 | 1.0	0.008 | 1.0	0.032 | 1.0	0.0 | 1.0	0.032 | 1.0	0.008 | 1.0	0.0 | 1.0	0.01 | 1.0	0.009 | 1.0	0.016 | 1.0	0.0 | 1.0	0.016 | 1.0	0.013 | 1.0	0.0 | 1.0	0.015 | 1.0	0.014 | 1.0
CD80_CD28	CPI-SS0DC98E54D	simple:P33681	simple:P10747	ENSG00000121594	ENSG00000178562	curated	FALSE	FALSE	0.007 | 1.0	0.0 | 1.0	0.0 | 1.0	0.0 | 1.0	0.0 | 1.0	0.002 | 1.0	0.002 | 1.0	0.0 | 1.0	0.0 | 1.0	0.004 | 1.0	0.003 | 1.0	0.005 | 1.0	0.0 | 1.0	0.0 | 1.0	0.0 | 1.0	0.0 | 1.0	0.002 | 1.0	0.002 | 1.0	0.002 | 1.0	0.0 | 1.0	0.0 | 1.0	0.0 | 1.0	0.0 | 1.0	0.002 | 1.0	0.002 | 1.0
EPHA7_EFNA5	CPI-SS007DA8C89	simple:Q15375	simple:P52803	ENSG00000135333	ENSG00000184349	curated	FALSE	FALSE	0.0 | 1.0	0.005 | 1.0	0.004 | 1.0	0.002 | 1.0	0.003 | 1.0	0.0 | 1.0	0.0 | 1.0	0.006 | 1.0	0.007 | 1.0	0.0 | 1.0	0.0 | 1.0	0.0 | 1.0	0.008 | 1.0	0.007 | 1.0	0.013 | 1.0	0.014 | 1.0	0.0 | 1.0	0.0 | 1.0	0.0 | 1.0	0.008 | 1.0	0.007 | 1.0	0.004 | 1.0	0.005 | 1.0	0.0 | 1.0	0.0 | 1.0
EPHB2_EFNA5	CPI-SS0586F2596	simple:P29323	simple:P52803	ENSG00000133216	ENSG00000184349	curated	FALSE	FALSE	0.0 | 1.0	0.032 | 1.0	0.031 | 1.0	0.041 | 1.0	0.042 | 1.0	0.0 | 1.0	0.0 | 1.0	0.099 | 1.0	0.1 | 1.0	0.0 | 1.0	0.0 | 1.0	0.0 | 1.0	0.058 | 1.0	0.057 | 1.0	0.046 | 1.0	0.047 | 1.0	0.0 | 1.0	0.0 | 1.0	0.0 | 1.0	0.039 | 1.0	0.038 | 1.0	0.037 | 1.0	0.038 | 1.0	0.0 | 1.0	0.0 | 1.0
EPHA7_EFNA2	CPI-SS0A16EDB50	simple:Q15375	simple:O43921	ENSG00000135333	ENSG00000099617	curated	FALSE	FALSE	0.004 | 1.0	0.0 | 1.0	0.0 | 1.0	0.0 | 1.0	0.003 | 1.0	0.0 | 1.0	0.003 | 1.0	0.0 | 1.0	0.006 | 1.0	0.0 | 1.0	0.006 | 1.0	0.007 | 1.0	0.0 | 1.0	0.0 | 1.0	0.0 | 1.0	0.013 | 1.0	0.0 | 1.0	0.013 | 1.0	0.007 | 1.0	0.0 | 1.0	0.0 | 1.0	0.0 | 1.0	0.004 | 1.0	0.0 | 1.0	0.004 | 1.0
EPHA4_EFNA2	CPI-SS0BC458CF7	simple:P54764	simple:O43921	ENSG00000116106	ENSG00000099617	curated	FALSE	FALSE	0.093 | 1.0	0.0 | 1.0	0.0 | 1.0	0.0 | 1.0	0.244 | 1.0	0.0 | 1.0	0.245 | 1.0	0.0 | 1.0	0.215 | 1.0	0.0 | 1.0	0.216 | 1.0	0.186 | 1.0	0.0 | 1.0	0.0 | 1.0	0.0 | 1.0	0.072 | 1.0	0.0 | 1.0	0.072 | 1.0	0.06 | 1.0	0.0 | 1.0	0.0 | 1.0	0.0 | 1.0	0.251 | 1.0	0.0 | 1.0	0.251 | 1.0
KIR3DL1_HLAA	CPI-SS0A1321116	simple:P43629	simple:HLAA	ENSG00000167633	ENSG00000206503	curated	FALSE	FALSE	0.0 | 1.0	0.0 | 1.0	0.0 | 1.0	0.0 | 1.0	0.0 | 1.0	0.0 | 1.0	0.0 | 1.0	0.049 | 1.0	0.346 | 1.0	0.055 | 1.0	0.042 | 1.0	0.047 | 1.0	0.253 | 1.0	0.051 | 1.0	0.0 | 1.0	0.0 | 1.0	0.0 | 1.0	0.0 | 1.0	0.0 | 1.0	0.0 | 1.0	0.0 | 1.0	0.049 | 1.0	0.347 | 1.0	0.055 | 1.0	0.042 | 1.0
PSAP_GPR37	CPI-SS0D8DE8E59	simple:P07602	simple:O15354	ENSG00000197746	ENSG00000170775	guidetopharmacology.org	TRUE	FALSE	0.351 | 1.0	0.348 | 1.0	0.344 | 1.0	0.467 | 1.0	0.432 | 1.0	0.443 | 1.0	0.45 | 1.0	0.479 | 1.0	0.444 | 1.0	0.455 | 1.0	0.462 | 1.0	0.324 | 1.0	0.322 | 1.0	0.317 | 1.0	0.351 | 1.0	0.317 | 1.0	0.327 | 1.0	0.334 | 1.0	0.35 | 1.0	0.348 | 1.0	0.343 | 1.0	0.437 | 1.0	0.403 | 1.0	0.413 | 1.0	0.42 | 1.0
PSAP_GPR37L1	CPI-SS075B1AA3A	simple:P07602	simple:O60883	ENSG00000197746	ENSG00000170075	guidetopharmacology.org	TRUE	FALSE	0.337 | 1.0	0.339 | 1.0	0.338 | 1.0	0.429 | 1.0	0.435 | 1.0	0.429 | 1.0	0.428 | 1.0	0.441 | 1.0	0.447 | 1.0	0.441 | 1.0	0.44 | 1.0	0.311 | 1.0	0.313 | 1.0	0.312 | 1.0	0.313 | 1.0	0.319 | 1.0	0.313 | 1.0	0.312 | 1.0	0.337 | 1.0	0.339 | 1.0	0.338 | 1.0	0.399 | 1.0	0.405 | 1.0	0.399 | 1.0	0.398 | 1.0
MST1_MST1R	CPI-SS03EACE0E0	simple:P26927	simple:Q04912	ENSG00000173531	ENSG00000164078	curated	TRUE	FALSE	0.003 | 1.0	0.0 | 1.0	0.002 | 1.0	0.0 | 1.0	0.001 | 1.0	0.002 | 1.0	0.0 | 1.0	0.0 | 1.0	0.0 | 1.0	0.0 | 1.0	0.0 | 1.0	0.004 | 1.0	0.0 | 1.0	0.003 | 1.0	0.0 | 1.0	0.002 | 1.0	0.003 | 1.0	0.0 | 1.0	0.0 | 1.0	0.0 | 1.0	0.0 | 1.0	0.0 | 1.0	0.002 | 1.0	0.002 | 1.0	0.0 | 1.0
FGFR2_FGF10	CPI-SS0189C79E7	simple:P21802	simple:O15520	ENSG00000066468	ENSG00000070193	IntAct	TRUE	FALSE	0.745 | 1.0	0.748 | 1.0	0.764 | 1.0	0.118 | 1.0	0.12 | 1.0	0.125 | 1.0	0.122 | 1.0	0.349 | 1.0	0.351 | 1.0	0.355 | 1.0	0.352 | 1.0	0.179 | 1.0	0.183 | 1.0	0.198 | 1.0	0.139 | 1.0	0.141 | 1.0	0.146 | 1.0	0.143 | 1.0	0.094 | 1.0	0.097 | 1.0	0.113 | 1.0	0.075 | 1.0	0.077 | 1.0	0.082 | 1.0	0.078 | 1.0
KIR3DL2_HLAB	CPI-SS033F53E30	simple:P43630	simple:HLAB	ENSG00000240403	ENSG00000234745	curated	FALSE	FALSE	0.0 | 1.0	0.0 | 1.0	0.0 | 1.0	0.0 | 1.0	0.0 | 1.0	0.0 | 1.0	0.0 | 1.0	0.049 | 1.0	0.346 | 1.0	0.055 | 1.0	0.042 | 1.0	0.047 | 1.0	0.253 | 1.0	0.051 | 1.0	0.0 | 1.0	0.0 | 1.0	0.0 | 1.0	0.0 | 1.0	0.0 | 1.0	0.0 | 1.0	0.0 | 1.0	0.049 | 1.0	0.347 | 1.0	0.055 | 1.0	0.042 | 1.0
TNFSF12_TNFRSF12A	CPI-SS02EF3E1BA	simple:O43508	simple:Q9NP84	ENSG00000239697	ENSG00000006327	curated	TRUE	FALSE	0.06 | 1.0	0.166 | 1.0	0.043 | 1.0	0.089 | 1.0	0.323 | 0.0	0.118 | 1.0	0.097 | 1.0	0.038 | 1.0	0.271 | 1.0	0.066 | 1.0	0.046 | 1.0	0.049 | 1.0	0.156 | 1.0	0.032 | 1.0	0.09 | 1.0	0.324 | 0.0	0.119 | 1.0	0.098 | 1.0	0.078 | 1.0	0.184 | 1.0	0.061 | 1.0	0.076 | 1.0	0.309 | 0.0	0.104 | 1.0	0.084 | 1.0
GRP_GRPR	CPI-SS07AF9303D	simple:P07492	simple:P30550	ENSG00000134443	ENSG00000126010	guidetopharmacology.org	TRUE	FALSE	0.003 | 1.0	0.0 | 1.0	0.0 | 1.0	0.001 | 1.0	0.0 | 1.0	0.003 | 1.0	0.002 | 1.0	0.001 | 1.0	0.0 | 1.0	0.003 | 1.0	0.002 | 1.0	0.0 | 1.0	0.0 | 1.0	0.0 | 1.0	0.0 | 1.0	0.0 | 1.0	0.0 | 1.0	0.0 | 1.0	0.0 | 1.0	0.0 | 1.0	0.0 | 1.0	0.002 | 1.0	0.0 | 1.0	0.003 | 1.0	0.002 | 1.0
DSC2_DSG2	CPI-SS06D13FCD3	simple:Q02487	simple:Q14126	ENSG00000134755	ENSG00000046604	curated	FALSE	FALSE	0.007 | 1.0	0.1 | 1.0	0.004 | 1.0	0.007 | 1.0	0.126 | 1.0	0.006 | 1.0	0.01 | 1.0	0.107 | 1.0	0.226 | 0.0	0.106 | 1.0	0.11 | 1.0	0.068 | 1.0	0.162 | 1.0	0.065 | 1.0	0.006 | 1.0	0.125 | 1.0	0.005 | 1.0	0.009 | 1.0	0.01 | 1.0	0.104 | 1.0	0.007 | 1.0	0.007 | 1.0	0.126 | 1.0	0.006 | 1.0	0.01 | 1.0
DSC2_DSG1	CPI-SS0B02B63C2	simple:Q02487	simple:Q02413	ENSG00000134755	ENSG00000134760	curated	FALSE	FALSE	0.002 | 1.0	0.003 | 1.0	0.002 | 1.0	0.004 | 1.0	0.006 | 1.0	0.004 | 1.0	0.004 | 1.0	0.104 | 1.0	0.106 | 1.0	0.104 | 1.0	0.104 | 1.0	0.064 | 1.0	0.064 | 1.0	0.063 | 1.0	0.003 | 1.0	0.005 | 1.0	0.004 | 1.0	0.003 | 1.0	0.006 | 1.0	0.006 | 1.0	0.005 | 1.0	0.004 | 1.0	0.006 | 1.0	0.005 | 1.0	0.004 | 1.0
DSC1_DSG1	CPI-SS0C1520B40	simple:Q08554	simple:Q02413	ENSG00000134765	ENSG00000134760	curated	FALSE	FALSE	0.003 | 1.0	0.003 | 1.0	0.002 | 1.0	0.0 | 1.0	0.0 | 1.0	0.0 | 1.0	0.0 | 1.0	0.0 | 1.0	0.0 | 1.0	0.0 | 1.0	0.0 | 1.0	0.0 | 1.0	0.0 | 1.0	0.0 | 1.0	0.001 | 1.0	0.003 | 1.0	0.001 | 1.0	0.001 | 1.0	0.003 | 1.0	0.003 | 1.0	0.002 | 1.0	0.001 | 1.0	0.003 | 1.0	0.001 | 1.0	0.001 | 1.0
LRP1_MDK	CPI-SS067695081	simple:Q07954	simple:P21741	ENSG00000123384	ENSG00000110492	InnateDB-All	TRUE	FALSE	1.668 | 0.0	1.415 | 0.312	1.125 | 1.0	1.336 | 0.81	2.714 | 0.0	1.198 | 1.0	1.01 | 1.0	0.996 | 1.0	2.374 | 1.0	0.858 | 1.0	0.67 | 1.0	1.367 | 1.0	1.114 | 1.0	0.823 | 1.0	1.196 | 1.0	2.574 | 0.0	1.058 | 1.0	0.87 | 1.0	1.636 | 0.0	1.384 | 0.428	1.093 | 1.0	1.338 | 0.81	2.716 | 0.0	1.2 | 1.0	1.012 | 1.0
PTPRZ1_MDK	CPI-SS03B99978F	simple:P23471	simple:P21741	ENSG00000106278	ENSG00000110492	curated	TRUE	FALSE	1.36 | 1.0	1.108 | 1.0	0.817 | 1.0	0.959 | 1.0	2.337 | 1.0	0.821 | 1.0	0.633 | 1.0	0.962 | 1.0	2.34 | 1.0	0.824 | 1.0	0.636 | 1.0	1.396 | 1.0	1.143 | 1.0	0.853 | 1.0	0.96 | 1.0	2.338 | 1.0	0.822 | 1.0	0.634 | 1.0	1.354 | 1.0	1.102 | 1.0	0.811 | 1.0	0.959 | 1.0	2.337 | 1.0	0.821 | 1.0	0.633 | 1.0
LRP1_PDGFB	CPI-SS052F9CDB6	simple:Q07954	simple:P01127	ENSG00000123384	ENSG00000100311	InnateDB-All	TRUE	FALSE	0.318 | 1.0	0.335 | 1.0	0.319 | 1.0	0.383 | 1.0	0.394 | 1.0	0.384 | 1.0	0.383 | 1.0	0.043 | 1.0	0.054 | 1.0	0.044 | 1.0	0.043 | 1.0	0.017 | 1.0	0.033 | 1.0	0.018 | 1.0	0.243 | 1.0	0.254 | 1.0	0.244 | 1.0	0.243 | 1.0	0.287 | 1.0	0.303 | 1.0	0.287 | 1.0	0.385 | 1.0	0.396 | 1.0	0.386 | 1.0	0.385 | 1.0
PTPRZ1_PTN	CPI-SS050195FEB	simple:P23471	simple:P21246	ENSG00000106278	ENSG00000105894	curated	TRUE	FALSE	2.333 | 1.0	1.112 | 1.0	4.364 | 1.0	0.91 | 1.0	1.657 | 1.0	3.736 | 1.0	1.337 | 1.0	0.913 | 1.0	1.66 | 1.0	3.739 | 1.0	1.34 | 1.0	2.368 | 1.0	1.147 | 1.0	4.4 | 1.0	0.911 | 1.0	1.658 | 1.0	3.737 | 1.0	1.338 | 1.0	2.327 | 1.0	1.106 | 1.0	4.358 | 1.0	0.91 | 1.0	1.656 | 1.0	3.736 | 1.0	1.337 | 1.0
GAST_CCKBR	CPI-SS0830AF8E6	simple:P01350	simple:P32239	ENSG00000184502	ENSG00000110148	guidetopharmacology.org	TRUE	FALSE	0.0 | 1.0	0.0 | 1.0	0.0 | 1.0	0.0 | 1.0	0.0 | 1.0	0.0 | 1.0	0.0 | 1.0	0.0 | 1.0	0.0 | 1.0	0.0 | 1.0	0.0 | 1.0	0.003 | 1.0	0.0 | 1.0	0.0 | 1.0	0.001 | 1.0	0.001 | 1.0	0.001 | 1.0	0.003 | 1.0	0.0 | 1.0	0.0 | 1.0	0.0 | 1.0	0.001 | 1.0	0.001 | 1.0	0.001 | 1.0	0.002 | 1.0
CCK_CCKBR	CPI-SS00AD71822	simple:P06307	simple:P32239	ENSG00000187094	ENSG00000110148	guidetopharmacology.org	TRUE	FALSE	0.001 | 1.0	0.0 | 1.0	0.0 | 1.0	0.0 | 1.0	0.0 | 1.0	0.0 | 1.0	0.0 | 1.0	0.002 | 1.0	0.002 | 1.0	0.002 | 1.0	0.003 | 1.0	0.0 | 1.0	0.0 | 1.0	0.0 | 1.0	0.0 | 1.0	0.0 | 1.0	0.0 | 1.0	0.0 | 1.0	0.0 | 1.0	0.0 | 1.0	0.0 | 1.0	0.0 | 1.0	0.0 | 1.0	0.0 | 1.0	0.0 | 1.0
CCK_CCKAR	CPI-SS0EA96C304	simple:P06307	simple:P32238	ENSG00000187094	ENSG00000163394	InnateDB-All	TRUE	FALSE	0.002 | 1.0	0.0 | 1.0	0.0 | 1.0	0.0 | 1.0	0.0 | 1.0	0.0 | 1.0	0.0 | 1.0	0.0 | 1.0	0.004 | 1.0	0.002 | 1.0	0.002 | 1.0	0.0 | 1.0	0.0 | 1.0	0.0 | 1.0	0.0 | 1.0	0.0 | 1.0	0.0 | 1.0	0.0 | 1.0	0.0 | 1.0	0.0 | 1.0	0.0 | 1.0	0.0 | 1.0	0.0 | 1.0	0.0 | 1.0	0.0 | 1.0
CEACAM6_CEACAM1	CPI-SS0E21A90FE	simple:P40199	simple:P13688	ENSG00000086548	ENSG00000079385	curated	TRUE	FALSE	0.026 | 1.0	0.042 | 1.0	0.018 | 1.0	0.012 | 1.0	0.021 | 1.0	0.015 | 1.0	0.013 | 1.0	0.021 | 1.0	0.029 | 1.0	0.023 | 1.0	0.021 | 1.0	0.042 | 1.0	0.058 | 1.0	0.034 | 1.0	0.015 | 1.0	0.023 | 1.0	0.017 | 1.0	0.015 | 1.0	0.018 | 1.0	0.034 | 1.0	0.01 | 1.0	0.013 | 1.0	0.021 | 1.0	0.015 | 1.0	0.014 | 1.0
CEACAM5_CEACAM1	CPI-SS0B537DD3F	simple:P06731	simple:P13688	ENSG00000105388	ENSG00000079385	curated	TRUE	FALSE	0.026 | 1.0	0.042 | 1.0	0.018 | 1.0	0.012 | 1.0	0.021 | 1.0	0.015 | 1.0	0.013 | 1.0	0.021 | 1.0	0.029 | 1.0	0.023 | 1.0	0.021 | 1.0	0.042 | 1.0	0.058 | 1.0	0.034 | 1.0	0.015 | 1.0	0.023 | 1.0	0.017 | 1.0	0.015 | 1.0	0.018 | 1.0	0.034 | 1.0	0.01 | 1.0	0.013 | 1.0	0.021 | 1.0	0.015 | 1.0	0.014 | 1.0
CEACAM8_CEACAM1	CPI-SS02318B112	simple:P31997	simple:P13688	ENSG00000124469	ENSG00000079385	curated	TRUE	FALSE	0.026 | 1.0	0.042 | 1.0	0.018 | 1.0	0.012 | 1.0	0.021 | 1.0	0.015 | 1.0	0.013 | 1.0	0.021 | 1.0	0.029 | 1.0	0.023 | 1.0	0.021 | 1.0	0.042 | 1.0	0.058 | 1.0	0.034 | 1.0	0.015 | 1.0	0.023 | 1.0	0.017 | 1.0	0.015 | 1.0	0.018 | 1.0	0.034 | 1.0	0.01 | 1.0	0.013 | 1.0	0.021 | 1.0	0.015 | 1.0	0.014 | 1.0
CEACAM6_CEACAM8	CPI-SS0812B2E9F	simple:P40199	simple:P31997	ENSG00000086548	ENSG00000124469	curated	FALSE	FALSE	0.026 | 1.0	0.042 | 1.0	0.018 | 1.0	0.012 | 1.0	0.021 | 1.0	0.015 | 1.0	0.013 | 1.0	0.021 | 1.0	0.029 | 1.0	0.023 | 1.0	0.021 | 1.0	0.042 | 1.0	0.058 | 1.0	0.034 | 1.0	0.015 | 1.0	0.023 | 1.0	0.017 | 1.0	0.015 | 1.0	0.018 | 1.0	0.034 | 1.0	0.01 | 1.0	0.013 | 1.0	0.021 | 1.0	0.015 | 1.0	0.014 | 1.0
CEACAM5_CD8A	CPI-SS04B37190C	simple:P06731	simple:P01732	ENSG00000105388	ENSG00000153563	curated	TRUE	FALSE	0.015 | 1.0	0.015 | 1.0	0.014 | 1.0	0.007 | 1.0	0.017 | 1.0	0.012 | 1.0	0.007 | 1.0	0.016 | 1.0	0.025 | 1.0	0.02 | 1.0	0.015 | 1.0	0.031 | 1.0	0.031 | 1.0	0.03 | 1.0	0.01 | 1.0	0.019 | 1.0	0.014 | 1.0	0.009 | 1.0	0.007 | 1.0	0.007 | 1.0	0.006 | 1.0	0.008 | 1.0	0.018 | 1.0	0.013 | 1.0	0.008 | 1.0
CEACAM5_CD1D	CPI-SS0AC66088D	simple:P06731	simple:P15813	ENSG00000105388	ENSG00000158473	curated	FALSE	FALSE	0.016 | 1.0	0.073 | 1.0	0.017 | 1.0	0.008 | 1.0	0.066 | 1.0	0.012 | 1.0	0.01 | 1.0	0.016 | 1.0	0.075 | 1.0	0.02 | 1.0	0.019 | 1.0	0.032 | 1.0	0.089 | 1.0	0.033 | 1.0	0.01 | 1.0	0.069 | 1.0	0.014 | 1.0	0.013 | 1.0	0.008 | 1.0	0.065 | 1.0	0.009 | 1.0	0.009 | 1.0	0.067 | 1.0	0.013 | 1.0	0.011 | 1.0
TNFSF15_TNFRSF25	CPI-SS0B0CF0EDF	simple:O95150	simple:Q93038	ENSG00000181634	ENSG00000215788	guidetopharmacology.org	TRUE	FALSE	0.011 | 1.0	0.0 | 1.0	0.0 | 1.0	0.025 | 1.0	0.008 | 1.0	0.002 | 1.0	0.008 | 1.0	0.043 | 1.0	0.027 | 1.0	0.02 | 1.0	0.027 | 1.0	0.025 | 1.0	0.0 | 1.0	0.0 | 1.0	0.0 | 1.0	0.0 | 1.0	0.0 | 1.0	0.0 | 1.0	0.009 | 1.0	0.0 | 1.0	0.0 | 1.0	0.025 | 1.0	0.008 | 1.0	0.002 | 1.0	0.008 | 1.0
POMC_MC3R	CPI-SS0B1F94CD2	simple:P01189	simple:P41968	ENSG00000115138	ENSG00000124089	guidetopharmacology.org	TRUE	FALSE	0.0 | 1.0	0.0 | 1.0	0.0 | 1.0	0.0 | 1.0	0.002 | 1.0	0.0 | 1.0	0.002 | 1.0	0.0 | 1.0	0.01 | 1.0	0.0 | 1.0	0.01 | 1.0	0.0 | 1.0	0.0 | 1.0	0.0 | 1.0	0.0 | 1.0	0.001 | 1.0	0.0 | 1.0	0.001 | 1.0	0.0 | 1.0	0.0 | 1.0	0.0 | 1.0	0.0 | 1.0	0.004 | 1.0	0.0 | 1.0	0.004 | 1.0
AGRP_MC3R	CPI-SS034C2FBA9	simple:O00253	simple:P41968	ENSG00000159723	ENSG00000124089	guidetopharmacology.org	TRUE	FALSE	0.0 | 1.0	0.0 | 1.0	0.0 | 1.0	0.0 | 1.0	0.001 | 1.0	0.0 | 1.0	0.001 | 1.0	0.0 | 1.0	0.002 | 1.0	0.0 | 1.0	0.001 | 1.0	0.0 | 1.0	0.0 | 1.0	0.0 | 1.0	0.0 | 1.0	0.0 | 1.0	0.0 | 1.0	0.0 | 1.0	0.0 | 1.0	0.0 | 1.0	0.0 | 1.0	0.0 | 1.0	0.001 | 1.0	0.0 | 1.0	0.001 | 1.0
POMC_MC4R	CPI-SS098F8DB82	simple:P01189	simple:P32245	ENSG00000115138	ENSG00000166603	guidetopharmacology.org	TRUE	FALSE	0.009 | 1.0	0.007 | 1.0	0.0 | 1.0	0.003 | 1.0	0.003 | 1.0	0.002 | 1.0	0.002 | 1.0	0.011 | 1.0	0.011 | 1.0	0.01 | 1.0	0.01 | 1.0	0.008 | 1.0	0.006 | 1.0	0.0 | 1.0	0.002 | 1.0	0.002 | 1.0	0.001 | 1.0	0.001 | 1.0	0.007 | 1.0	0.005 | 1.0	0.0 | 1.0	0.005 | 1.0	0.005 | 1.0	0.004 | 1.0	0.004 | 1.0
AGRP_MC4R	CPI-SS09CF5B145	simple:O00253	simple:P32245	ENSG00000159723	ENSG00000166603	guidetopharmacology.org	TRUE	FALSE	0.005 | 1.0	0.003 | 1.0	0.0 | 1.0	0.002 | 1.0	0.002 | 1.0	0.001 | 1.0	0.001 | 1.0	0.002 | 1.0	0.002 | 1.0	0.001 | 1.0	0.001 | 1.0	0.0 | 1.0	0.0 | 1.0	0.0 | 1.0	0.0 | 1.0	0.0 | 1.0	0.0 | 1.0	0.0 | 1.0	0.0 | 1.0	0.0 | 1.0	0.0 | 1.0	0.002 | 1.0	0.002 | 1.0	0.001 | 1.0	0.001 | 1.0
POMC_MC5R	CPI-SS0BE6DBE1A	simple:P01189	simple:P33032	ENSG00000115138	ENSG00000176136	guidetopharmacology.org	TRUE	FALSE	0.0 | 1.0	0.0 | 1.0	0.0 | 1.0	0.002 | 1.0	0.003 | 1.0	0.0 | 1.0	0.002 | 1.0	0.01 | 1.0	0.011 | 1.0	0.0 | 1.0	0.01 | 1.0	0.0 | 1.0	0.0 | 1.0	0.0 | 1.0	0.001 | 1.0	0.002 | 1.0	0.0 | 1.0	0.001 | 1.0	0.0 | 1.0	0.0 | 1.0	0.0 | 1.0	0.004 | 1.0	0.005 | 1.0	0.0 | 1.0	0.004 | 1.0
AGRP_MC5R	CPI-SS0CC136A8D	simple:O00253	simple:P33032	ENSG00000159723	ENSG00000176136	guidetopharmacology.org	TRUE	FALSE	0.0 | 1.0	0.0 | 1.0	0.0 | 1.0	0.001 | 1.0	0.002 | 1.0	0.0 | 1.0	0.001 | 1.0	0.001 | 1.0	0.002 | 1.0	0.0 | 1.0	0.001 | 1.0	0.0 | 1.0	0.0 | 1.0	0.0 | 1.0	0.0 | 1.0	0.0 | 1.0	0.0 | 1.0	0.0 | 1.0	0.0 | 1.0	0.0 | 1.0	0.0 | 1.0	0.001 | 1.0	0.002 | 1.0	0.0 | 1.0	0.001 | 1.0
PVR_CD226	CPI-SS0A8627ED6	simple:P15151	simple:Q15762	ENSG00000073008	ENSG00000150637	curated	TRUE	FALSE	0.009 | 1.0	0.01 | 1.0	0.01 | 1.0	0.017 | 1.0	0.015 | 1.0	0.018 | 1.0	0.016 | 1.0	0.066 | 1.0	0.064 | 1.0	0.067 | 1.0	0.065 | 1.0	0.06 | 1.0	0.06 | 1.0	0.06 | 1.0	0.019 | 1.0	0.017 | 1.0	0.019 | 1.0	0.017 | 1.0	0.021 | 1.0	0.022 | 1.0	0.022 | 1.0	0.012 | 1.0	0.009 | 1.0	0.012 | 1.0	0.01 | 1.0
NECTIN2_CD226	CPI-SS01036C1ED	simple:Q92692	simple:Q15762	ENSG00000130202	ENSG00000150637	curated	FALSE	FALSE	0.038 | 1.0	0.038 | 1.0	0.038 | 1.0	0.062 | 1.0	0.059 | 1.0	0.062 | 1.0	0.06 | 1.0	0.121 | 1.0	0.119 | 1.0	0.122 | 1.0	0.119 | 1.0	0.089 | 1.0	0.089 | 1.0	0.089 | 1.0	0.05 | 1.0	0.047 | 1.0	0.05 | 1.0	0.048 | 1.0	0.047 | 1.0	0.047 | 1.0	0.047 | 1.0	0.05 | 1.0	0.047 | 1.0	0.05 | 1.0	0.048 | 1.0
PVR_NECTIN3	CPI-SS0F1A060D4	simple:P15151	simple:Q9NQS3	ENSG00000073008	ENSG00000177707	curated	TRUE	FALSE	0.008 | 1.0	0.0 | 1.0	0.0 | 1.0	0.014 | 1.0	0.021 | 1.0	0.016 | 1.0	0.015 | 1.0	0.064 | 1.0	0.07 | 1.0	0.065 | 1.0	0.064 | 1.0	0.059 | 1.0	0.0 | 1.0	0.0 | 1.0	0.016 | 1.0	0.023 | 1.0	0.018 | 1.0	0.017 | 1.0	0.02 | 1.0	0.0 | 1.0	0.0 | 1.0	0.009 | 1.0	0.015 | 1.0	0.011 | 1.0	0.009 | 1.0
PVR_PRR3	CPI-SS0F1A060D4	simple:P15151	simple:Q9NQS3	ENSG00000073008	ENSG00000204576	curated	TRUE	FALSE	0.063 | 1.0	0.068 | 1.0	0.049 | 1.0	0.062 | 1.0	0.081 | 1.0	0.056 | 1.0	0.055 | 1.0	0.112 | 1.0	0.13 | 1.0	0.105 | 1.0	0.104 | 1.0	0.114 | 1.0	0.118 | 1.0	0.1 | 1.0	0.064 | 1.0	0.083 | 1.0	0.057 | 1.0	0.057 | 1.0	0.075 | 1.0	0.08 | 1.0	0.062 | 1.0	0.057 | 1.0	0.075 | 1.0	0.05 | 1.0	0.05 | 1.0
NECTIN2_NECTIN3	CPI-SS02FBD007E	simple:Q92692	simple:Q9NQS3	ENSG00000130202	ENSG00000177707	curated	FALSE	FALSE	0.036 | 1.0	0.0 | 1.0	0.0 | 1.0	0.059 | 1.0	0.065 | 1.0	0.06 | 1.0	0.059 | 1.0	0.118 | 1.0	0.125 | 1.0	0.12 | 1.0	0.119 | 1.0	0.088 | 1.0	0.0 | 1.0	0.0 | 1.0	0.047 | 1.0	0.053 | 1.0	0.049 | 1.0	0.047 | 1.0	0.045 | 1.0	0.0 | 1.0	0.0 | 1.0	0.047 | 1.0	0.053 | 1.0	0.049 | 1.0	0.047 | 1.0
NECTIN2_PRR3	CPI-SS02FBD007E	simple:Q92692	simple:Q9NQS3	ENSG00000130202	ENSG00000204576	curated	FALSE	FALSE	0.091 | 1.0	0.096 | 1.0	0.078 | 1.0	0.107 | 1.0	0.125 | 1.0	0.1 | 1.0	0.099 | 1.0	0.166 | 1.0	0.185 | 1.0	0.16 | 1.0	0.159 | 1.0	0.143 | 1.0	0.147 | 1.0	0.129 | 1.0	0.095 | 1.0	0.114 | 1.0	0.088 | 1.0	0.088 | 1.0	0.1 | 1.0	0.105 | 1.0	0.087 | 1.0	0.095 | 1.0	0.113 | 1.0	0.088 | 1.0	0.088 | 1.0
NECTIN1_NECTIN3	CPI-SS0C5E9FBFB	simple:Q15223	simple:Q9NQS3	ENSG00000110400	ENSG00000177707	curated	TRUE	FALSE	0.18 | 1.0	0.0 | 1.0	0.0 | 1.0	0.105 | 1.0	0.112 | 1.0	0.107 | 1.0	0.106 | 1.0	0.018 | 1.0	0.024 | 1.0	0.02 | 1.0	0.018 | 1.0	0.034 | 1.0	0.0 | 1.0	0.0 | 1.0	0.018 | 1.0	0.025 | 1.0	0.02 | 1.0	0.019 | 1.0	0.018 | 1.0	0.0 | 1.0	0.0 | 1.0	0.049 | 1.0	0.055 | 1.0	0.051 | 1.0	0.049 | 1.0
NECTIN1_PRR3	CPI-SS0C5E9FBFB	simple:Q15223	simple:Q9NQS3	ENSG00000110400	ENSG00000204576	curated	TRUE	FALSE	0.235 | 1.0	0.24 | 1.0	0.221 | 1.0	0.153 | 1.0	0.172 | 1.0	0.146 | 1.0	0.146 | 1.0	0.066 | 1.0	0.084 | 1.0	0.059 | 1.0	0.059 | 1.0	0.089 | 1.0	0.093 | 1.0	0.075 | 1.0	0.066 | 1.0	0.085 | 1.0	0.06 | 1.0	0.059 | 1.0	0.073 | 1.0	0.078 | 1.0	0.059 | 1.0	0.097 | 1.0	0.115 | 1.0	0.09 | 1.0	0.089 | 1.0
CD96_PVR	CPI-SS0ABFB17ED	simple:P40200	simple:P15151	ENSG00000153283	ENSG00000073008	curated	TRUE	FALSE	0.0 | 1.0	0.0 | 1.0	0.0 | 1.0	0.014 | 1.0	0.064 | 1.0	0.016 | 1.0	0.009 | 1.0	0.0 | 1.0	0.0 | 1.0	0.0 | 1.0	0.0 | 1.0	0.0 | 1.0	0.0 | 1.0	0.0 | 1.0	0.0 | 1.0	0.0 | 1.0	0.0 | 1.0	0.0 | 1.0	0.0 | 1.0	0.0 | 1.0	0.0 | 1.0	0.014 | 1.0	0.064 | 1.0	0.016 | 1.0	0.009 | 1.0
CD96_NECTIN1	CPI-SS03F821467	simple:P40200	simple:Q15223	ENSG00000153283	ENSG00000110400	curated	TRUE	FALSE	0.0 | 1.0	0.0 | 1.0	0.0 | 1.0	0.105 | 1.0	0.018 | 1.0	0.018 | 1.0	0.049 | 1.0	0.0 | 1.0	0.0 | 1.0	0.0 | 1.0	0.0 | 1.0	0.0 | 1.0	0.0 | 1.0	0.0 | 1.0	0.0 | 1.0	0.0 | 1.0	0.0 | 1.0	0.0 | 1.0	0.0 | 1.0	0.0 | 1.0	0.0 | 1.0	0.105 | 1.0	0.018 | 1.0	0.018 | 1.0	0.049 | 1.0
DSG2_DSC1	CPI-SS0109D5B6A	simple:Q14126	simple:Q08554	ENSG00000046604	ENSG00000134765	curated	FALSE	FALSE	0.007 | 1.0	0.0 | 1.0	0.007 | 1.0	0.0 | 1.0	0.0 | 1.0	0.004 | 1.0	0.004 | 1.0	0.0 | 1.0	0.0 | 1.0	0.123 | 1.0	0.123 | 1.0	0.101 | 1.0	0.0 | 1.0	0.101 | 1.0	0.0 | 1.0	0.0 | 1.0	0.003 | 1.0	0.003 | 1.0	0.004 | 1.0	0.0 | 1.0	0.004 | 1.0	0.0 | 1.0	0.0 | 1.0	0.007 | 1.0	0.007 | 1.0
DSG2_DSC3	CPI-SS0B6F0C894	simple:Q14126	simple:Q14574	ENSG00000046604	ENSG00000134762	curated	FALSE	FALSE	0.01 | 1.0	0.008 | 1.0	0.008 | 1.0	0.004 | 1.0	0.007 | 1.0	0.005 | 1.0	0.005 | 1.0	0.123 | 1.0	0.126 | 1.0	0.125 | 1.0	0.124 | 1.0	0.104 | 1.0	0.102 | 1.0	0.102 | 1.0	0.003 | 1.0	0.006 | 1.0	0.004 | 1.0	0.004 | 1.0	0.007 | 1.0	0.005 | 1.0	0.005 | 1.0	0.007 | 1.0	0.01 | 1.0	0.008 | 1.0	0.008 | 1.0
DSG1_DSC3	CPI-SS09000F32A	simple:Q02413	simple:Q14574	ENSG00000134760	ENSG00000134762	curated	FALSE	FALSE	0.006 | 1.0	0.004 | 1.0	0.004 | 1.0	0.001 | 1.0	0.004 | 1.0	0.003 | 1.0	0.002 | 1.0	0.003 | 1.0	0.006 | 1.0	0.004 | 1.0	0.004 | 1.0	0.006 | 1.0	0.004 | 1.0	0.004 | 1.0	0.002 | 1.0	0.005 | 1.0	0.003 | 1.0	0.003 | 1.0	0.005 | 1.0	0.003 | 1.0	0.003 | 1.0	0.001 | 1.0	0.004 | 1.0	0.003 | 1.0	0.002 | 1.0
FCER2_CR2	CPI-SS000568A0E	simple:P06734	simple:P20023	ENSG00000104921	ENSG00000117322	curated	TRUE	FALSE	0.0 | 1.0	0.0 | 1.0	0.0 | 1.0	0.0 | 1.0	0.0 | 1.0	0.0 | 1.0	0.0 | 1.0	0.004 | 1.0	0.002 | 1.0	0.0 | 1.0	0.003 | 1.0	0.0 | 1.0	0.0 | 1.0	0.0 | 1.0	0.0 | 1.0	0.0 | 1.0	0.0 | 1.0	0.0 | 1.0	0.003 | 1.0	0.003 | 1.0	0.002 | 1.0	0.0 | 1.0	0.0 | 1.0	0.0 | 1.0	0.0 | 1.0
IGF1R_IGF2	CPI-SS09DB7D3A1	simple:P08069	simple:P01344	ENSG00000140443	ENSG00000167244	curated	TRUE	FALSE	1.541 | 1.0	0.173 | 1.0	3.204 | 1.0	0.985 | 1.0	0.162 | 1.0	2.171 | 1.0	1.198 | 1.0	0.987 | 1.0	0.164 | 1.0	2.172 | 1.0	1.199 | 1.0	1.54 | 1.0	0.172 | 1.0	3.202 | 1.0	0.985 | 1.0	0.162 | 1.0	2.171 | 1.0	1.198 | 1.0	1.542 | 1.0	0.174 | 1.0	3.205 | 1.0	0.986 | 1.0	0.163 | 1.0	2.172 | 1.0	1.198 | 1.0
IGF1R_IGF1	CPI-SS0C7732B91	simple:P08069	simple:P05019	ENSG00000140443	ENSG00000017427	curated	TRUE	FALSE	0.137 | 1.0	0.041 | 1.0	0.404 | 1.0	0.127 | 1.0	0.048 | 1.0	0.451 | 1.0	0.161 | 1.0	0.128 | 1.0	0.049 | 1.0	0.453 | 1.0	0.163 | 1.0	0.136 | 1.0	0.039 | 1.0	0.403 | 1.0	0.127 | 1.0	0.048 | 1.0	0.451 | 1.0	0.161 | 1.0	0.138 | 1.0	0.042 | 1.0	0.405 | 1.0	0.128 | 1.0	0.049 | 1.0	0.452 | 1.0	0.162 | 1.0
ADM_CALCR	CPI-SS0EE592271	simple:P35318	simple:P30988	ENSG00000148926	ENSG00000004948	guidetopharmacology.org	TRUE	FALSE	0.009 | 1.0	0.01 | 1.0	0.0 | 1.0	0.014 | 1.0	0.015 | 1.0	0.015 | 1.0	0.014 | 1.0	0.2 | 1.0	0.2 | 1.0	0.201 | 1.0	0.2 | 1.0	0.203 | 1.0	0.203 | 1.0	0.0 | 1.0	0.018 | 1.0	0.018 | 1.0	0.019 | 1.0	0.018 | 1.0	0.021 | 1.0	0.022 | 1.0	0.0 | 1.0	0.028 | 1.0	0.028 | 1.0	0.029 | 1.0	0.028 | 1.0
ADM2_CALCR	CPI-SS062D34D75	simple:Q7Z4H4	simple:P30988	ENSG00000128165	ENSG00000004948	guidetopharmacology.org	TRUE	FALSE	0.002 | 1.0	0.003 | 1.0	0.0 | 1.0	0.0 | 1.0	0.0 | 1.0	0.0 | 1.0	0.0 | 1.0	0.003 | 1.0	0.003 | 1.0	0.004 | 1.0	0.003 | 1.0	0.004 | 1.0	0.004 | 1.0	0.0 | 1.0	0.001 | 1.0	0.001 | 1.0	0.002 | 1.0	0.001 | 1.0	0.0 | 1.0	0.0 | 1.0	0.0 | 1.0	0.001 | 1.0	0.001 | 1.0	0.002 | 1.0	0.001 | 1.0
CALCA_CALCR	CPI-SS015B2F961	simple:P01258	simple:P30988	ENSG00000110680	ENSG00000004948	guidetopharmacology.org	TRUE	FALSE	0.0 | 1.0	0.0 | 1.0	0.0 | 1.0	0.003 | 1.0	0.003 | 1.0	0.004 | 1.0	0.003 | 1.0	0.003 | 1.0	0.003 | 1.0	0.004 | 1.0	0.003 | 1.0	0.0 | 1.0	0.0 | 1.0	0.0 | 1.0	0.003 | 1.0	0.003 | 1.0	0.004 | 1.0	0.003 | 1.0	0.0 | 1.0	0.0 | 1.0	0.0 | 1.0	0.001 | 1.0	0.002 | 1.0	0.002 | 1.0	0.001 | 1.0
IAPP_CALCR	CPI-SS00D9A2FD0	simple:P10997	simple:P30988	ENSG00000121351	ENSG00000004948	guidetopharmacology.org	TRUE	FALSE	0.002 | 1.0	0.003 | 1.0	0.0 | 1.0	0.001 | 1.0	0.001 | 1.0	0.002 | 1.0	0.001 | 1.0	0.0 | 1.0	0.0 | 1.0	0.0 | 1.0	0.0 | 1.0	0.0 | 1.0	0.0 | 1.0	0.0 | 1.0	0.001 | 1.0	0.001 | 1.0	0.002 | 1.0	0.001 | 1.0	0.0 | 1.0	0.0 | 1.0	0.0 | 1.0	0.0 | 1.0	0.0 | 1.0	0.0 | 1.0	0.0 | 1.0
CALCB_CALCR	CPI-SS07CF0C6E7	simple:P10092	simple:P30988	ENSG00000175868	ENSG00000004948	guidetopharmacology.org	TRUE	FALSE	0.002 | 1.0	0.003 | 1.0	0.0 | 1.0	0.001 | 1.0	0.002 | 1.0	0.002 | 1.0	0.001 | 1.0	0.0 | 1.0	0.0 | 1.0	0.0 | 1.0	0.0 | 1.0	0.0 | 1.0	0.0 | 1.0	0.0 | 1.0	0.001 | 1.0	0.001 | 1.0	0.002 | 1.0	0.001 | 1.0	0.0 | 1.0	0.0 | 1.0	0.0 | 1.0	0.002 | 1.0	0.002 | 1.0	0.003 | 1.0	0.002 | 1.0
ADM_MRGPRX2	CPI-SS0522A6CFA	simple:P35318	simple:Q96LB1	ENSG00000148926	ENSG00000183695	guidetopharmacology.org	TRUE	FALSE	0.009 | 1.0	0.01 | 1.0	0.0 | 1.0	0.014 | 1.0	0.0 | 1.0	0.015 | 1.0	0.015 | 1.0	0.2 | 1.0	0.0 | 1.0	0.2 | 1.0	0.201 | 1.0	0.202 | 1.0	0.203 | 1.0	0.0 | 1.0	0.018 | 1.0	0.0 | 1.0	0.018 | 1.0	0.018 | 1.0	0.021 | 1.0	0.022 | 1.0	0.0 | 1.0	0.028 | 1.0	0.0 | 1.0	0.028 | 1.0	0.029 | 1.0
NOTCH2_DLL1	CPI-SS0F20B8633	simple:Q04721	simple:O00548	ENSG00000134250	ENSG00000198719	curated	FALSE	FALSE	0.006 | 1.0	0.0 | 1.0	0.004 | 1.0	0.006 | 1.0	0.004 | 1.0	0.002 | 1.0	0.003 | 1.0	0.008 | 1.0	0.007 | 1.0	0.005 | 1.0	0.006 | 1.0	0.005 | 1.0	0.0 | 1.0	0.003 | 1.0	0.006 | 1.0	0.004 | 1.0	0.002 | 1.0	0.003 | 1.0	0.004 | 1.0	0.0 | 1.0	0.002 | 1.0	0.006 | 1.0	0.004 | 1.0	0.002 | 1.0	0.003 | 1.0
C3_C3AR1	CPI-SS03E48EFEA	simple:P01024	simple:Q16581	ENSG00000125730	ENSG00000171860	guidetopharmacology.org	TRUE	FALSE	0.003 | 1.0	0.006 | 1.0	0.0 | 1.0	0.0 | 1.0	0.002 | 1.0	0.0 | 1.0	0.002 | 1.0	0.0 | 1.0	0.029 | 1.0	0.0 | 1.0	0.029 | 1.0	0.057 | 1.0	0.06 | 1.0	0.0 | 1.0	0.0 | 1.0	0.005 | 1.0	0.0 | 1.0	0.005 | 1.0	0.002 | 1.0	0.005 | 1.0	0.0 | 1.0	0.0 | 1.0	0.006 | 1.0	0.0 | 1.0	0.006 | 1.0
SPN_SIGLEC1	CPI-SS02A170A99	simple:P16150	simple:Q9BZZ2	ENSG00000197471	ENSG00000088827	curated	TRUE	FALSE	0.015 | 1.0	0.011 | 1.0	0.015 | 1.0	0.007 | 1.0	0.006 | 1.0	0.008 | 1.0	0.006 | 1.0	0.02 | 1.0	0.018 | 1.0	0.021 | 1.0	0.018 | 1.0	0.016 | 1.0	0.012 | 1.0	0.017 | 1.0	0.007 | 1.0	0.005 | 1.0	0.008 | 1.0	0.005 | 1.0	0.009 | 1.0	0.005 | 1.0	0.009 | 1.0	0.007 | 1.0	0.005 | 1.0	0.008 | 1.0	0.005 | 1.0
ICAM1_ITGAL	CPI-SS0E9A581F8	simple:P05362	simple:P20701	ENSG00000090339	ENSG00000005844	curated	FALSE	FALSE	0.015 | 1.0	0.0 | 1.0	0.0 | 1.0	0.037 | 1.0	0.038 | 1.0	0.0 | 1.0	0.037 | 1.0	0.024 | 1.0	0.024 | 1.0	0.0 | 1.0	0.024 | 1.0	0.034 | 1.0	0.0 | 1.0	0.0 | 1.0	0.152 | 1.0	0.152 | 1.0	0.0 | 1.0	0.152 | 1.0	0.078 | 1.0	0.0 | 1.0	0.0 | 1.0	0.059 | 1.0	0.059 | 1.0	0.0 | 1.0	0.059 | 1.0
NTRK2_NTF4	CPI-SS0D79D2F2A	simple:Q16620	simple:P34130	ENSG00000148053	ENSG00000225950	IntAct	TRUE	FALSE	0.409 | 1.0	0.0 | 1.0	0.407 | 1.0	0.704 | 1.0	0.7 | 1.0	0.701 | 1.0	0.7 | 1.0	0.087 | 1.0	0.083 | 1.0	0.084 | 1.0	0.083 | 1.0	0.06 | 1.0	0.0 | 1.0	0.058 | 1.0	0.654 | 1.0	0.65 | 1.0	0.651 | 1.0	0.65 | 1.0	0.588 | 1.0	0.0 | 1.0	0.587 | 1.0	0.429 | 1.0	0.425 | 1.0	0.426 | 1.0	0.425 | 1.0
NTRK2_NTF3	CPI-SS0CF7B434C	simple:Q16620	simple:P20783	ENSG00000148053	ENSG00000185652	curated	TRUE	FALSE	0.404 | 1.0	0.405 | 1.0	0.408 | 1.0	0.708 | 1.0	0.701 | 1.0	0.709 | 1.0	0.705 | 1.0	0.091 | 1.0	0.084 | 1.0	0.091 | 1.0	0.087 | 1.0	0.056 | 1.0	0.056 | 1.0	0.059 | 1.0	0.658 | 1.0	0.651 | 1.0	0.659 | 1.0	0.654 | 1.0	0.584 | 1.0	0.585 | 1.0	0.588 | 1.0	0.433 | 1.0	0.426 | 1.0	0.434 | 1.0	0.43 | 1.0
NTRK1_NTF3	CPI-SS004A073E1	simple:P04629	simple:P20783	ENSG00000198400	ENSG00000185652	curated	TRUE	FALSE	0.009 | 1.0	0.009 | 1.0	0.012 | 1.0	0.011 | 1.0	0.004 | 1.0	0.012 | 1.0	0.008 | 1.0	0.015 | 1.0	0.008 | 1.0	0.015 | 1.0	0.011 | 1.0	0.006 | 1.0	0.006 | 1.0	0.009 | 1.0	0.011 | 1.0	0.004 | 1.0	0.012 | 1.0	0.008 | 1.0	0.003 | 1.0	0.003 | 1.0	0.006 | 1.0	0.012 | 1.0	0.005 | 1.0	0.013 | 1.0	0.009 | 1.0
SORT1_GRN	CPI-SS063F6EED4	simple:Q99523	simple:P28799	ENSG00000134243	ENSG00000030582	MINT	TRUE	FALSE	0.19 | 1.0	0.309 | 1.0	0.216 | 1.0	0.206 | 1.0	0.298 | 1.0	0.187 | 1.0	0.232 | 1.0	0.44 | 0.0	0.532 | 0.0	0.422 | 0.0	0.466 | 0.0	0.362 | 0.0	0.481 | 0.0	0.388 | 0.0	0.215 | 1.0	0.307 | 1.0	0.197 | 1.0	0.241 | 1.0	0.198 | 1.0	0.318 | 1.0	0.224 | 1.0	0.21 | 1.0	0.301 | 1.0	0.191 | 1.0	0.235 | 1.0
SORT1_COPA	CPI-SS0F94A3DAC	simple:Q99523	simple:P53621	ENSG00000134243	ENSG00000122218	IntAct	TRUE	FALSE	0.271 | 1.0	0.249 | 1.0	0.248 | 1.0	0.222 | 1.0	0.245 | 1.0	0.248 | 1.0	0.192 | 1.0	0.456 | 0.0	0.479 | 0.0	0.482 | 0.0	0.426 | 0.0	0.443 | 0.0	0.421 | 0.0	0.42 | 0.0	0.231 | 1.0	0.254 | 1.0	0.257 | 1.0	0.201 | 1.0	0.279 | 1.0	0.257 | 1.0	0.257 | 1.0	0.226 | 1.0	0.249 | 1.0	0.251 | 1.0	0.195 | 1.0
MTNR1B_COPA	CPI-SS04C3EC52C	simple:P49286	simple:P53621	ENSG00000134640	ENSG00000122218	IntAct	TRUE	FALSE	0.244 | 1.0	0.223 | 1.0	0.222 | 1.0	0.211 | 1.0	0.234 | 1.0	0.236 | 1.0	0.181 | 1.0	0.0 | 1.0	0.0 | 1.0	0.0 | 1.0	0.0 | 1.0	0.0 | 1.0	0.0 | 1.0	0.0 | 1.0	0.0 | 1.0	0.0 | 1.0	0.0 | 1.0	0.0 | 1.0	0.0 | 1.0	0.0 | 1.0	0.0 | 1.0	0.211 | 1.0	0.234 | 1.0	0.236 | 1.0	0.181 | 1.0
PLXNC1_SEMA7A	CPI-SS02B567BC7	simple:O60486	simple:O75326	ENSG00000136040	ENSG00000138623	curated	FALSE	FALSE	0.002 | 1.0	0.003 | 1.0	0.002 | 1.0	0.002 | 1.0	0.0 | 1.0	0.002 | 1.0	0.002 | 1.0	0.002 | 1.0	0.0 | 1.0	0.002 | 1.0	0.002 | 1.0	0.005 | 1.0	0.006 | 1.0	0.005 | 1.0	0.004 | 1.0	0.0 | 1.0	0.004 | 1.0	0.004 | 1.0	0.002 | 1.0	0.003 | 1.0	0.002 | 1.0	0.002 | 1.0	0.0 | 1.0	0.003 | 1.0	0.003 | 1.0
PROKR2_ADIPOQ	CPI-SS0FC17A1D0	simple:Q8NFJ6	simple:Q15848	ENSG00000101292	ENSG00000181092	IntAct	TRUE	FALSE	0.0 | 1.0	0.0 | 1.0	0.0 | 1.0	0.037 | 1.0	0.047 | 1.0	0.027 | 1.0	0.029 | 1.0	0.0 | 1.0	0.0 | 1.0	0.0 | 1.0	0.0 | 1.0	0.0 | 1.0	0.0 | 1.0	0.0 | 1.0	0.037 | 1.0	0.047 | 1.0	0.027 | 1.0	0.03 | 1.0	0.0 | 1.0	0.0 | 1.0	0.0 | 1.0	0.037 | 1.0	0.047 | 1.0	0.027 | 1.0	0.03 | 1.0
ASGR2_ADIPOQ	CPI-SS04A4A2334	simple:P07307	simple:Q15848	ENSG00000161944	ENSG00000181092	IntAct	TRUE	FALSE	0.096 | 1.0	0.102 | 1.0	0.056 | 1.0	0.089 | 1.0	0.099 | 1.0	0.079 | 1.0	0.082 | 1.0	0.042 | 1.0	0.052 | 1.0	0.032 | 1.0	0.034 | 1.0	0.096 | 1.0	0.102 | 1.0	0.055 | 1.0	0.038 | 1.0	0.049 | 1.0	0.029 | 1.0	0.031 | 1.0	0.095 | 1.0	0.101 | 1.0	0.054 | 1.0	0.081 | 1.0	0.091 | 1.0	0.071 | 1.0	0.073 | 1.0
CLEC2D_ADIPOQ	CPI-SS04C79FED3	simple:Q9UHP7	simple:Q15848	ENSG00000069493	ENSG00000181092	IntAct	TRUE	FALSE	0.099 | 1.0	0.105 | 1.0	0.059 | 1.0	0.04 | 1.0	0.05 | 1.0	0.03 | 1.0	0.033 | 1.0	0.042 | 1.0	0.053 | 1.0	0.033 | 1.0	0.035 | 1.0	0.11 | 1.0	0.116 | 1.0	0.07 | 1.0	0.044 | 1.0	0.054 | 1.0	0.034 | 1.0	0.036 | 1.0	0.099 | 1.0	0.105 | 1.0	0.058 | 1.0	0.041 | 1.0	0.051 | 1.0	0.031 | 1.0	0.033 | 1.0
CLEC2D_FAM3C	CPI-SS04EEA951D	simple:Q9UHP7	simple:Q92520	ENSG00000069493	ENSG00000196937	IntAct	TRUE	FALSE	0.16 | 1.0	0.2 | 1.0	0.135 | 1.0	0.095 | 1.0	0.119 | 1.0	0.094 | 1.0	0.083 | 1.0	0.097 | 1.0	0.121 | 1.0	0.096 | 1.0	0.085 | 1.0	0.171 | 1.0	0.212 | 1.0	0.146 | 1.0	0.098 | 1.0	0.122 | 1.0	0.098 | 1.0	0.086 | 1.0	0.16 | 1.0	0.2 | 1.0	0.135 | 1.0	0.095 | 1.0	0.119 | 1.0	0.095 | 1.0	0.083 | 1.0
ALCAM_CD6	CPI-SS04256AA73	simple:Q13740	simple:P30203	ENSG00000170017	ENSG00000013725	curated	TRUE	FALSE	0.059 | 1.0	0.0 | 1.0	0.0 | 1.0	0.029 | 1.0	0.031 | 1.0	0.0 | 1.0	0.031 | 1.0	0.232 | 1.0	0.234 | 1.0	0.0 | 1.0	0.233 | 1.0	0.266 | 1.0	0.0 | 1.0	0.0 | 1.0	0.117 | 1.0	0.119 | 1.0	0.0 | 1.0	0.119 | 1.0	0.195 | 1.0	0.0 | 1.0	0.0 | 1.0	0.047 | 1.0	0.048 | 1.0	0.0 | 1.0	0.048 | 1.0
PYY_NPY1R	CPI-SS0A9F17199	simple:P10082	simple:P25929	ENSG00000131096	ENSG00000164128	guidetopharmacology.org	TRUE	FALSE	0.0 | 1.0	0.0 | 1.0	0.0 | 1.0	0.004 | 1.0	0.0 | 1.0	0.008 | 1.0	0.003 | 1.0	0.0 | 1.0	0.0 | 1.0	0.0 | 1.0	0.0 | 1.0	0.006 | 1.0	0.0 | 1.0	0.013 | 1.0	0.0 | 1.0	0.0 | 1.0	0.0 | 1.0	0.0 | 1.0	0.003 | 1.0	0.0 | 1.0	0.009 | 1.0	0.004 | 1.0	0.0 | 1.0	0.008 | 1.0	0.003 | 1.0
PYY_NPY2R	CPI-SS0FEF2FF5D	simple:P10082	simple:P49146	ENSG00000131096	ENSG00000185149	guidetopharmacology.org	TRUE	FALSE	0.0 | 1.0	0.0 | 1.0	0.0 | 1.0	0.0 | 1.0	0.0 | 1.0	0.0 | 1.0	0.001 | 1.0	0.0 | 1.0	0.0 | 1.0	0.0 | 1.0	0.0 | 1.0	0.0 | 1.0	0.0 | 1.0	0.0 | 1.0	0.0 | 1.0	0.0 | 1.0	0.0 | 1.0	0.0 | 1.0	0.0 | 1.0	0.0 | 1.0	0.0 | 1.0	0.0 | 1.0	0.0 | 1.0	0.0 | 1.0	0.001 | 1.0
PYY_NPY4R	CPI-SS0A82945AA	simple:P10082	simple:P50391	ENSG00000131096	ENSG00000204174	guidetopharmacology.org	TRUE	FALSE	0.0 | 1.0	0.0 | 1.0	0.0 | 1.0	0.0 | 1.0	0.002 | 1.0	0.0 | 1.0	0.002 | 1.0	0.0 | 1.0	0.0 | 1.0	0.0 | 1.0	0.0 | 1.0	0.005 | 1.0	0.0 | 1.0	0.0 | 1.0	0.0 | 1.0	0.0 | 1.0	0.0 | 1.0	0.0 | 1.0	0.002 | 1.0	0.0 | 1.0	0.0 | 1.0	0.0 | 1.0	0.002 | 1.0	0.0 | 1.0	0.002 | 1.0
PNP_NPY4R	CPI-SS0A06F86B9	simple:P01298	simple:P50391	ENSG00000198805	ENSG00000204174	guidetopharmacology.org	TRUE	FALSE	0.04 | 1.0	0.0 | 1.0	0.0 | 1.0	0.0 | 1.0	0.036 | 1.0	0.0 | 1.0	0.035 | 1.0	0.0 | 1.0	0.068 | 1.0	0.0 | 1.0	0.068 | 1.0	0.038 | 1.0	0.0 | 1.0	0.0 | 1.0	0.0 | 1.0	0.044 | 1.0	0.0 | 1.0	0.043 | 1.0	0.018 | 1.0	0.0 | 1.0	0.0 | 1.0	0.0 | 1.0	0.023 | 1.0	0.0 | 1.0	0.022 | 1.0
PPY_NPY4R	CPI-SS0A06F86B9	simple:P01298	simple:P50391	ENSG00000108849	ENSG00000204174	guidetopharmacology.org	TRUE	FALSE	0.001 | 1.0	0.0 | 1.0	0.0 | 1.0	0.0 | 1.0	0.002 | 1.0	0.0 | 1.0	0.002 | 1.0	0.0 | 1.0	0.0 | 1.0	0.0 | 1.0	0.0 | 1.0	0.0 | 1.0	0.0 | 1.0	0.0 | 1.0	0.0 | 1.0	0.0 | 1.0	0.0 | 1.0	0.0 | 1.0	0.0 | 1.0	0.0 | 1.0	0.0 | 1.0	0.0 | 1.0	0.0 | 1.0	0.0 | 1.0	0.0 | 1.0
PNP_NPY5R	CPI-SS0C2000B56	simple:P01298	simple:Q15761	ENSG00000198805	ENSG00000164129	guidetopharmacology.org	TRUE	FALSE	0.04 | 1.0	0.0 | 1.0	0.0 | 1.0	0.0 | 1.0	0.038 | 1.0	0.035 | 1.0	0.035 | 1.0	0.0 | 1.0	0.071 | 1.0	0.068 | 1.0	0.068 | 1.0	0.038 | 1.0	0.0 | 1.0	0.0 | 1.0	0.0 | 1.0	0.046 | 1.0	0.044 | 1.0	0.043 | 1.0	0.019 | 1.0	0.0 | 1.0	0.0 | 1.0	0.0 | 1.0	0.025 | 1.0	0.023 | 1.0	0.022 | 1.0
PPY_NPY5R	CPI-SS0C2000B56	simple:P01298	simple:Q15761	ENSG00000108849	ENSG00000164129	guidetopharmacology.org	TRUE	FALSE	0.002 | 1.0	0.0 | 1.0	0.0 | 1.0	0.0 | 1.0	0.004 | 1.0	0.002 | 1.0	0.002 | 1.0	0.0 | 1.0	0.0 | 1.0	0.0 | 1.0	0.0 | 1.0	0.0 | 1.0	0.0 | 1.0	0.0 | 1.0	0.0 | 1.0	0.0 | 1.0	0.0 | 1.0	0.0 | 1.0	0.0 | 1.0	0.0 | 1.0	0.0 | 1.0	0.0 | 1.0	0.0 | 1.0	0.0 | 1.0	0.0 | 1.0
FLT3LG_FLT3	CPI-SS0D97E07F8	simple:P49771	simple:P36888	ENSG00000090554	ENSG00000122025	curated	TRUE	FALSE	0.0 | 1.0	0.0 | 1.0	0.0 | 1.0	0.0 | 1.0	0.0 | 1.0	0.0 | 1.0	0.0 | 1.0	0.0 | 1.0	0.0 | 1.0	0.0 | 1.0	0.002 | 1.0	0.0 | 1.0	0.0 | 1.0	0.0 | 1.0	0.0 | 1.0	0.0 | 1.0	0.0 | 1.0	0.0 | 1.0	0.0 | 1.0	0.0 | 1.0	0.0 | 1.0	0.0 | 1.0	0.0 | 1.0	0.0 | 1.0	0.0 | 1.0
FGFR1_NCAM1	CPI-SS039799099	simple:P11362	simple:P13591	ENSG00000077782	ENSG00000149294	curated	TRUE	FALSE	0.129 | 1.0	0.018 | 1.0	0.023 | 1.0	0.023 | 1.0	0.005 | 1.0	0.016 | 1.0	0.013 | 1.0	0.023 | 1.0	0.005 | 1.0	0.017 | 1.0	0.014 | 1.0	0.128 | 1.0	0.017 | 1.0	0.022 | 1.0	0.023 | 1.0	0.005 | 1.0	0.016 | 1.0	0.014 | 1.0	0.127 | 1.0	0.016 | 1.0	0.021 | 1.0	0.023 | 1.0	0.005 | 1.0	0.016 | 1.0	0.013 | 1.0
FLG_NCAM1	CPI-SS039799099	simple:P11362	simple:P13591	ENSG00000143631	ENSG00000149294	curated	TRUE	FALSE	0.0 | 1.0	0.0 | 1.0	0.0 | 1.0	0.0 | 1.0	0.0 | 1.0	0.0 | 1.0	0.0 | 1.0	0.0 | 1.0	0.0 | 1.0	0.0 | 1.0	0.0 | 1.0	0.0 | 1.0	0.0 | 1.0	0.0 | 1.0	0.0 | 1.0	0.0 | 1.0	0.0 | 1.0	0.0 | 1.0	0.0 | 1.0	0.0 | 1.0	0.0 | 1.0	0.023 | 1.0	0.005 | 1.0	0.016 | 1.0	0.013 | 1.0
RARRES2_CMKLR1	CPI-SS0CDEE4A57	simple:Q99969	simple:Q99788	ENSG00000106538	ENSG00000174600	guidetopharmacology.org	TRUE	FALSE	0.054 | 1.0	0.054 | 1.0	0.048 | 1.0	0.103 | 1.0	0.095 | 1.0	0.096 | 1.0	0.095 | 1.0	0.029 | 1.0	0.02 | 1.0	0.021 | 1.0	0.02 | 1.0	0.021 | 1.0	0.021 | 1.0	0.016 | 1.0	0.132 | 1.0	0.123 | 1.0	0.124 | 1.0	0.123 | 1.0	0.107 | 1.0	0.106 | 1.0	0.101 | 1.0	0.102 | 1.0	0.093 | 1.0	0.095 | 1.0	0.093 | 1.0
RARRES2_GPR1	CPI-SS095A33EE9	simple:Q99969	simple:P46091	ENSG00000106538	ENSG00000183671	guidetopharmacology.org	TRUE	FALSE	0.048 | 1.0	0.0 | 1.0	0.0 | 1.0	0.0 | 1.0	0.093 | 1.0	0.0 | 1.0	0.093 | 1.0	0.0 | 1.0	0.018 | 1.0	0.0 | 1.0	0.018 | 1.0	0.016 | 1.0	0.0 | 1.0	0.0 | 1.0	0.0 | 1.0	0.121 | 1.0	0.0 | 1.0	0.121 | 1.0	0.101 | 1.0	0.0 | 1.0	0.0 | 1.0	0.0 | 1.0	0.092 | 1.0	0.0 | 1.0	0.091 | 1.0
IDE_IAPP	CPI-SS0DE409B24	simple:P14735	simple:P10997	ENSG00000119912	ENSG00000121351	InnateDB-All	TRUE	FALSE	0.023 | 1.0	0.0 | 1.0	0.0 | 1.0	0.026 | 1.0	0.0 | 1.0	0.026 | 1.0	0.0 | 1.0	0.072 | 1.0	0.0 | 1.0	0.072 | 1.0	0.0 | 1.0	0.077 | 1.0	0.0 | 1.0	0.0 | 1.0	0.023 | 1.0	0.0 | 1.0	0.024 | 1.0	0.0 | 1.0	0.035 | 1.0	0.0 | 1.0	0.0 | 1.0	0.027 | 1.0	0.0 | 1.0	0.027 | 1.0	0.0 | 1.0
WNT5A_FZD5	CPI-SS0E32BEF02	simple:P41221	simple:Q13467	ENSG00000114251	ENSG00000163251	curated	TRUE	FALSE	0.28 | 1.0	0.0 | 1.0	0.281 | 1.0	0.123 | 1.0	0.0 | 1.0	0.123 | 1.0	0.124 | 1.0	0.051 | 1.0	0.0 | 1.0	0.051 | 1.0	0.052 | 1.0	0.07 | 1.0	0.0 | 1.0	0.071 | 1.0	0.131 | 1.0	0.0 | 1.0	0.131 | 1.0	0.131 | 1.0	0.133 | 1.0	0.0 | 1.0	0.134 | 1.0	0.108 | 1.0	0.0 | 1.0	0.107 | 1.0	0.108 | 1.0
WNT7A_FZD5	CPI-SS05550A895	simple:O00755	simple:Q13467	ENSG00000154764	ENSG00000163251	curated	TRUE	FALSE	0.004 | 1.0	0.0 | 1.0	0.005 | 1.0	0.024 | 1.0	0.0 | 1.0	0.024 | 1.0	0.025 | 1.0	1.413 | 1.0	0.0 | 1.0	1.412 | 1.0	1.413 | 1.0	0.928 | 1.0	0.0 | 1.0	0.929 | 1.0	0.015 | 1.0	0.0 | 1.0	0.015 | 1.0	0.016 | 1.0	0.01 | 1.0	0.0 | 1.0	0.011 | 1.0	0.02 | 1.0	0.0 | 1.0	0.019 | 1.0	0.02 | 1.0
WNT5A_FZD3	CPI-SS002673EFE	simple:P41221	simple:Q9NPG1	ENSG00000114251	ENSG00000104290	curated	TRUE	FALSE	0.282 | 1.0	0.281 | 1.0	0.285 | 1.0	0.125 | 1.0	0.145 | 1.0	0.125 | 1.0	0.126 | 1.0	0.053 | 1.0	0.072 | 1.0	0.053 | 1.0	0.053 | 1.0	0.071 | 1.0	0.071 | 1.0	0.074 | 1.0	0.133 | 1.0	0.152 | 1.0	0.133 | 1.0	0.133 | 1.0	0.134 | 1.0	0.134 | 1.0	0.137 | 1.0	0.109 | 1.0	0.129 | 1.0	0.109 | 1.0	0.11 | 1.0
WNT2_FZD3	CPI-SS0F26BB901	simple:P09544	simple:Q9NPG1	ENSG00000105989	ENSG00000104290	curated	TRUE	FALSE	0.003 | 1.0	0.003 | 1.0	0.006 | 1.0	0.004 | 1.0	0.023 | 1.0	0.004 | 1.0	0.004 | 1.0	0.004 | 1.0	0.023 | 1.0	0.004 | 1.0	0.004 | 1.0	0.0 | 1.0	0.0 | 1.0	0.0 | 1.0	0.0 | 1.0	0.0 | 1.0	0.0 | 1.0	0.0 | 1.0	0.0 | 1.0	0.0 | 1.0	0.0 | 1.0	0.003 | 1.0	0.022 | 1.0	0.003 | 1.0	0.003 | 1.0
WNT5A_FZD2	CPI-SS01C2BA5C8	simple:P41221	simple:Q14332	ENSG00000114251	ENSG00000180340	curated	TRUE	FALSE	0.324 | 1.0	0.313 | 1.0	0.327 | 1.0	0.17 | 1.0	0.212 | 0.004	0.173 | 1.0	0.166 | 1.0	0.098 | 1.0	0.139 | 1.0	0.1 | 1.0	0.093 | 1.0	0.114 | 1.0	0.102 | 1.0	0.116 | 1.0	0.177 | 1.0	0.219 | 0.012	0.18 | 1.0	0.173 | 1.0	0.177 | 1.0	0.165 | 1.0	0.18 | 1.0	0.154 | 1.0	0.196 | 0.223	0.157 | 1.0	0.15 | 1.0
WNT3A_FZD2	CPI-SS0261EA048	simple:P56704	simple:Q14332	ENSG00000154342	ENSG00000180340	InnateDB-All	TRUE	FALSE	0.047 | 1.0	0.035 | 1.0	0.05 | 1.0	0.048 | 1.0	0.09 | 1.0	0.051 | 1.0	0.043 | 1.0	0.0 | 1.0	0.0 | 1.0	0.0 | 1.0	0.0 | 1.0	0.0 | 1.0	0.0 | 1.0	0.0 | 1.0	0.0 | 1.0	0.0 | 1.0	0.0 | 1.0	0.0 | 1.0	0.0 | 1.0	0.0 | 1.0	0.0 | 1.0	0.048 | 1.0	0.089 | 1.0	0.051 | 1.0	0.043 | 1.0
WNT2_FZD2	CPI-SS02C418D99	simple:P09544	simple:Q14332	ENSG00000105989	ENSG00000180340	curated	TRUE	FALSE	0.046 | 1.0	0.034 | 1.0	0.049 | 1.0	0.048 | 1.0	0.09 | 1.0	0.051 | 1.0	0.044 | 1.0	0.048 | 1.0	0.09 | 1.0	0.051 | 1.0	0.044 | 1.0	0.0 | 1.0	0.0 | 1.0	0.0 | 1.0	0.0 | 1.0	0.0 | 1.0	0.0 | 1.0	0.0 | 1.0	0.0 | 1.0	0.0 | 1.0	0.0 | 1.0	0.048 | 1.0	0.089 | 1.0	0.051 | 1.0	0.043 | 1.0
WNT5A_FZD6	CPI-SS06C087B42	simple:P41221	simple:O60353	ENSG00000114251	ENSG00000164930	curated	TRUE	FALSE	0.289 | 1.0	0.51 | 0.0	0.297 | 1.0	0.148 | 1.0	0.352 | 0.0	0.142 | 1.0	0.136 | 1.0	0.075 | 1.0	0.279 | 1.0	0.07 | 1.0	0.064 | 1.0	0.078 | 1.0	0.299 | 1.0	0.086 | 1.0	0.155 | 1.0	0.359 | 0.0	0.149 | 1.0	0.144 | 1.0	0.141 | 1.0	0.362 | 0.0	0.149 | 1.0	0.132 | 1.0	0.336 | 0.0	0.126 | 1.0	0.12 | 1.0
WNT4_FZD6	CPI-SS097A2D133	simple:P56705	simple:O60353	ENSG00000162552	ENSG00000164930	curated	TRUE	FALSE	0.643 | 1.0	0.865 | 0.0	0.652 | 1.0	0.434 | 1.0	0.638 | 0.0	0.428 | 1.0	0.422 | 1.0	0.078 | 1.0	0.282 | 1.0	0.072 | 1.0	0.066 | 1.0	0.101 | 1.0	0.322 | 0.869	0.109 | 1.0	0.165 | 1.0	0.369 | 0.4	0.159 | 1.0	0.154 | 1.0	0.092 | 1.0	0.313 | 0.992	0.1 | 1.0	0.371 | 1.0	0.575 | 0.0	0.365 | 1.0	0.359 | 1.0
RSPO1_LGR4	CPI-SS0057AB387	simple:Q2MKA7	simple:Q9BXB1	ENSG00000169218	ENSG00000205213	guidetopharmacology.org	TRUE	FALSE	0.02 | 1.0	0.007 | 1.0	0.021 | 1.0	0.017 | 1.0	0.042 | 1.0	0.021 | 1.0	0.019 | 1.0	0.007 | 1.0	0.031 | 1.0	0.011 | 1.0	0.009 | 1.0	0.019 | 1.0	0.006 | 1.0	0.02 | 1.0	0.02 | 1.0	0.044 | 1.0	0.024 | 1.0	0.022 | 1.0	0.042 | 1.0	0.029 | 1.0	0.043 | 1.0	0.051 | 1.0	0.075 | 1.0	0.055 | 1.0	0.053 | 1.0
RSPO2_LGR4	CPI-SS01E3453DB	simple:Q6UXX9	simple:Q9BXB1	ENSG00000147655	ENSG00000205213	guidetopharmacology.org	TRUE	FALSE	0.021 | 1.0	0.008 | 1.0	0.022 | 1.0	0.004 | 1.0	0.029 | 1.0	0.008 | 1.0	0.006 | 1.0	0.004 | 1.0	0.028 | 1.0	0.008 | 1.0	0.006 | 1.0	0.023 | 1.0	0.01 | 1.0	0.024 | 1.0	0.004 | 1.0	0.029 | 1.0	0.009 | 1.0	0.007 | 1.0	0.019 | 1.0	0.006 | 1.0	0.02 | 1.0	0.004 | 1.0	0.029 | 1.0	0.008 | 1.0	0.006 | 1.0
RSPO3_LGR4	CPI-SS0ACAB1835	simple:Q9BXY4	simple:Q9BXB1	ENSG00000146374	ENSG00000205213	guidetopharmacology.org	TRUE	FALSE	0.038 | 1.0	0.025 | 1.0	0.039 | 1.0	0.006 | 1.0	0.03 | 1.0	0.01 | 1.0	0.008 | 1.0	0.008 | 1.0	0.033 | 1.0	0.013 | 1.0	0.011 | 1.0	0.019 | 1.0	0.006 | 1.0	0.02 | 1.0	0.116 | 1.0	0.14 | 1.0	0.12 | 1.0	0.118 | 1.0	0.161 | 1.0	0.148 | 1.0	0.162 | 1.0	0.011 | 1.0	0.035 | 1.0	0.015 | 1.0	0.013 | 1.0
RSPO4_LGR4	CPI-SS034D3988F	simple:Q2I0M5	simple:Q9BXB1	ENSG00000101282	ENSG00000205213	guidetopharmacology.org	TRUE	FALSE	0.015 | 1.0	0.003 | 1.0	0.016 | 1.0	0.003 | 1.0	0.027 | 1.0	0.007 | 1.0	0.005 | 1.0	0.005 | 1.0	0.029 | 1.0	0.009 | 1.0	0.007 | 1.0	0.017 | 1.0	0.004 | 1.0	0.018 | 1.0	0.0 | 1.0	0.0 | 1.0	0.0 | 1.0	0.0 | 1.0	0.0 | 1.0	0.0 | 1.0	0.0 | 1.0	0.0 | 1.0	0.0 | 1.0	0.0 | 1.0	0.0 | 1.0
RSPO1_LGR5	CPI-SS09B2320BC	simple:Q2MKA7	simple:O75473	ENSG00000169218	ENSG00000139292	guidetopharmacology.org	TRUE	FALSE	0.008 | 1.0	0.051 | 1.0	0.007 | 1.0	0.016 | 1.0	0.048 | 1.0	0.0 | 1.0	0.018 | 1.0	0.005 | 1.0	0.038 | 1.0	0.0 | 1.0	0.008 | 1.0	0.007 | 1.0	0.05 | 1.0	0.006 | 1.0	0.018 | 1.0	0.051 | 1.0	0.0 | 1.0	0.02 | 1.0	0.03 | 1.0	0.073 | 1.0	0.029 | 1.0	0.049 | 1.0	0.082 | 1.0	0.0 | 1.0	0.051 | 1.0
RSPO2_LGR5	CPI-SS056D0AD0D	simple:Q6UXX9	simple:O75473	ENSG00000147655	ENSG00000139292	guidetopharmacology.org	TRUE	FALSE	0.009 | 1.0	0.052 | 1.0	0.008 | 1.0	0.003 | 1.0	0.035 | 1.0	0.0 | 1.0	0.005 | 1.0	0.002 | 1.0	0.035 | 1.0	0.0 | 1.0	0.005 | 1.0	0.011 | 1.0	0.054 | 1.0	0.01 | 1.0	0.003 | 1.0	0.036 | 1.0	0.0 | 1.0	0.005 | 1.0	0.007 | 1.0	0.05 | 1.0	0.006 | 1.0	0.003 | 1.0	0.035 | 1.0	0.0 | 1.0	0.005 | 1.0
RSPO3_LGR5	CPI-SS0C3906934	simple:Q9BXY4	simple:O75473	ENSG00000146374	ENSG00000139292	guidetopharmacology.org	TRUE	FALSE	0.026 | 1.0	0.069 | 1.0	0.025 | 1.0	0.004 | 1.0	0.037 | 1.0	0.0 | 1.0	0.006 | 1.0	0.007 | 1.0	0.04 | 1.0	0.0 | 1.0	0.009 | 1.0	0.007 | 1.0	0.05 | 1.0	0.006 | 1.0	0.114 | 1.0	0.147 | 1.0	0.0 | 1.0	0.116 | 1.0	0.149 | 1.0	0.192 | 1.0	0.148 | 1.0	0.009 | 1.0	0.042 | 1.0	0.0 | 1.0	0.011 | 1.0
RSPO4_LGR5	CPI-SS079CAC99C	simple:Q2I0M5	simple:O75473	ENSG00000101282	ENSG00000139292	guidetopharmacology.org	TRUE	FALSE	0.003 | 1.0	0.046 | 1.0	0.003 | 1.0	0.001 | 1.0	0.034 | 1.0	0.0 | 1.0	0.004 | 1.0	0.003 | 1.0	0.036 | 1.0	0.0 | 1.0	0.005 | 1.0	0.005 | 1.0	0.048 | 1.0	0.004 | 1.0	0.0 | 1.0	0.0 | 1.0	0.0 | 1.0	0.0 | 1.0	0.0 | 1.0	0.0 | 1.0	0.0 | 1.0	0.0 | 1.0	0.0 | 1.0	0.0 | 1.0	0.0 | 1.0
RSPO1_LGR6	CPI-SS0E5397537	simple:Q2MKA7	simple:Q9HBX8	ENSG00000169218	ENSG00000133067	guidetopharmacology.org	TRUE	FALSE	0.01 | 1.0	0.007 | 1.0	0.006 | 1.0	0.016 | 1.0	0.018 | 1.0	0.0 | 1.0	0.016 | 1.0	0.006 | 1.0	0.008 | 1.0	0.0 | 1.0	0.005 | 1.0	0.009 | 1.0	0.006 | 1.0	0.005 | 1.0	0.019 | 1.0	0.02 | 1.0	0.0 | 1.0	0.018 | 1.0	0.032 | 1.0	0.029 | 1.0	0.028 | 1.0	0.05 | 1.0	0.051 | 1.0	0.0 | 1.0	0.049 | 1.0
RSPO2_LGR6	CPI-SS019104E2E	simple:Q6UXX9	simple:Q9HBX8	ENSG00000147655	ENSG00000133067	guidetopharmacology.org	TRUE	FALSE	0.011 | 1.0	0.008 | 1.0	0.007 | 1.0	0.003 | 1.0	0.005 | 1.0	0.0 | 1.0	0.003 | 1.0	0.003 | 1.0	0.005 | 1.0	0.0 | 1.0	0.002 | 1.0	0.013 | 1.0	0.01 | 1.0	0.009 | 1.0	0.004 | 1.0	0.005 | 1.0	0.0 | 1.0	0.003 | 1.0	0.009 | 1.0	0.006 | 1.0	0.005 | 1.0	0.003 | 1.0	0.005 | 1.0	0.0 | 1.0	0.003 | 1.0
RSPO3_LGR6	CPI-SS0EB5364D4	simple:Q9BXY4	simple:Q9HBX8	ENSG00000146374	ENSG00000133067	guidetopharmacology.org	TRUE	FALSE	0.028 | 1.0	0.025 | 1.0	0.024 | 1.0	0.005 | 1.0	0.006 | 1.0	0.0 | 1.0	0.004 | 1.0	0.007 | 1.0	0.009 | 1.0	0.0 | 1.0	0.007 | 1.0	0.009 | 1.0	0.006 | 1.0	0.005 | 1.0	0.115 | 1.0	0.116 | 1.0	0.0 | 1.0	0.114 | 1.0	0.151 | 1.0	0.148 | 1.0	0.147 | 1.0	0.01 | 1.0	0.011 | 1.0	0.0 | 1.0	0.009 | 1.0
RSPO4_LGR6	CPI-SS0609FCF76	simple:Q2I0M5	simple:Q9HBX8	ENSG00000101282	ENSG00000133067	guidetopharmacology.org	TRUE	FALSE	0.005 | 1.0	0.003 | 1.0	0.002 | 1.0	0.002 | 1.0	0.004 | 1.0	0.0 | 1.0	0.001 | 1.0	0.004 | 1.0	0.005 | 1.0	0.0 | 1.0	0.003 | 1.0	0.007 | 1.0	0.004 | 1.0	0.003 | 1.0	0.0 | 1.0	0.0 | 1.0	0.0 | 1.0	0.0 | 1.0	0.0 | 1.0	0.0 | 1.0	0.0 | 1.0	0.0 | 1.0	0.0 | 1.0	0.0 | 1.0	0.0 | 1.0
CXCL16_CXCR6	CPI-SS0B1535576	simple:Q9H2A7	simple:O00574	ENSG00000161921	ENSG00000172215	guidetopharmacology.org	TRUE	FALSE	0.0 | 1.0	0.009 | 1.0	0.0 | 1.0	0.0 | 1.0	0.016 | 1.0	0.015 | 1.0	0.0 | 1.0	0.0 | 1.0	0.341 | 1.0	0.34 | 1.0	0.0 | 1.0	0.0 | 1.0	0.191 | 1.0	0.0 | 1.0	0.0 | 1.0	0.021 | 1.0	0.02 | 1.0	0.0 | 1.0	0.0 | 1.0	0.024 | 1.0	0.0 | 1.0	0.0 | 1.0	0.011 | 1.0	0.011 | 1.0	0.0 | 1.0
EDA_EDAR	CPI-SS05A8552D7	simple:Q92838	simple:Q9UNE0	ENSG00000158813	ENSG00000135960	guidetopharmacology.org	TRUE	FALSE	0.01 | 1.0	0.0 | 1.0	0.004 | 1.0	0.0 | 1.0	0.0 | 1.0	0.0 | 1.0	0.0 | 1.0	0.007 | 1.0	0.012 | 1.0	0.0 | 1.0	0.006 | 1.0	0.014 | 1.0	0.0 | 1.0	0.007 | 1.0	0.003 | 1.0	0.008 | 1.0	0.0 | 1.0	0.003 | 1.0	0.0 | 1.0	0.0 | 1.0	0.0 | 1.0	0.003 | 1.0	0.008 | 1.0	0.0 | 1.0	0.003 | 1.0
EDA_EDA2R	CPI-SS00797FD15	simple:Q92838	simple:Q9HAV5	ENSG00000158813	ENSG00000131080	guidetopharmacology.org	TRUE	FALSE	0.003 | 1.0	0.009 | 1.0	0.005 | 1.0	0.0 | 1.0	0.0 | 1.0	0.0 | 1.0	0.0 | 1.0	0.007 | 1.0	0.008 | 1.0	0.008 | 1.0	0.007 | 1.0	0.007 | 1.0	0.012 | 1.0	0.008 | 1.0	0.004 | 1.0	0.004 | 1.0	0.004 | 1.0	0.003 | 1.0	0.0 | 1.0	0.0 | 1.0	0.0 | 1.0	0.004 | 1.0	0.004 | 1.0	0.004 | 1.0	0.003 | 1.0
EDN2_EDNRA	CPI-SS056AA08CF	simple:P20800	simple:P25101	ENSG00000127129	ENSG00000151617	guidetopharmacology.org	TRUE	FALSE	0.0 | 1.0	0.0 | 1.0	0.0 | 1.0	0.24 | 1.0	0.042 | 1.0	0.224 | 1.0	0.128 | 1.0	0.0 | 1.0	0.0 | 1.0	0.0 | 1.0	0.0 | 1.0	0.0 | 1.0	0.0 | 1.0	0.0 | 1.0	0.0 | 1.0	0.0 | 1.0	0.0 | 1.0	0.0 | 1.0	0.0 | 1.0	0.0 | 1.0	0.0 | 1.0	0.0 | 1.0	0.0 | 1.0	0.0 | 1.0	0.0 | 1.0
PDGFC_FLT4	CPI-SS0EC50C68D	simple:Q9NRA1	simple:P35916	ENSG00000145431	ENSG00000037280	guidetopharmacology.org	TRUE	FALSE	0.018 | 1.0	0.022 | 1.0	0.0 | 1.0	0.011 | 1.0	0.015 | 1.0	0.0 | 1.0	0.01 | 1.0	0.144 | 1.0	0.148 | 1.0	0.0 | 1.0	0.144 | 1.0	0.107 | 1.0	0.11 | 1.0	0.0 | 1.0	0.026 | 1.0	0.03 | 1.0	0.0 | 1.0	0.025 | 1.0	0.01 | 1.0	0.014 | 1.0	0.0 | 1.0	0.012 | 1.0	0.016 | 1.0	0.0 | 1.0	0.011 | 1.0
VEGFC_FLT4	CPI-SS005572B52	simple:P49767	simple:P35916	ENSG00000150630	ENSG00000037280	curated	TRUE	FALSE	0.005 | 1.0	0.008 | 1.0	0.0 | 1.0	0.014 | 1.0	0.017 | 1.0	0.0 | 1.0	0.013 | 1.0	0.007 | 1.0	0.011 | 1.0	0.0 | 1.0	0.007 | 1.0	0.005 | 1.0	0.008 | 1.0	0.0 | 1.0	0.029 | 1.0	0.033 | 1.0	0.0 | 1.0	0.029 | 1.0	0.019 | 1.0	0.022 | 1.0	0.0 | 1.0	0.009 | 1.0	0.013 | 1.0	0.0 | 1.0	0.009 | 1.0
VEGFD_FLT4	CPI-SS0D883FFF1	simple:O43915	simple:P35916	ENSG00000165197	ENSG00000037280	curated	TRUE	FALSE	0.003 | 1.0	0.006 | 1.0	0.0 | 1.0	0.005 | 1.0	0.009 | 1.0	0.0 | 1.0	0.004 | 1.0	0.005 | 1.0	0.009 | 1.0	0.0 | 1.0	0.005 | 1.0	0.0 | 1.0	0.0 | 1.0	0.0 | 1.0	0.047 | 1.0	0.051 | 1.0	0.0 | 1.0	0.046 | 1.0	0.069 | 1.0	0.072 | 1.0	0.0 | 1.0	0.003 | 1.0	0.007 | 1.0	0.0 | 1.0	0.002 | 1.0
PDGFC_PDGFRA	CPI-SS06DA9B4FE	simple:Q9NRA1	simple:P16234	ENSG00000145431	ENSG00000134853	curated	TRUE	FALSE	1.23 | 1.0	0.049 | 1.0	0.723 | 1.0	0.799 | 1.0	0.058 | 1.0	0.454 | 1.0	0.692 | 1.0	0.933 | 0.0	0.192 | 1.0	0.588 | 0.996	0.825 | 0.0	1.319 | 0.0	0.137 | 1.0	0.811 | 0.008	0.814 | 1.0	0.073 | 1.0	0.469 | 1.0	0.707 | 1.0	1.222 | 1.0	0.041 | 1.0	0.715 | 1.0	0.801 | 1.0	0.059 | 1.0	0.455 | 1.0	0.693 | 1.0
PDGFB_PDGFRA	CPI-SS0FEEB187C	simple:P01127	simple:P16234	ENSG00000100311	ENSG00000134853	curated	TRUE	FALSE	1.214 | 1.0	0.032 | 1.0	0.706 | 1.0	0.791 | 1.0	0.05 | 1.0	0.446 | 1.0	0.684 | 1.0	0.802 | 1.0	0.061 | 1.0	0.457 | 1.0	0.695 | 1.0	1.23 | 1.0	0.048 | 1.0	0.722 | 1.0	0.792 | 1.0	0.051 | 1.0	0.447 | 1.0	0.685 | 1.0	1.214 | 1.0	0.032 | 1.0	0.707 | 1.0	0.791 | 1.0	0.05 | 1.0	0.446 | 1.0	0.684 | 1.0
PDGFA_PDGFRA	CPI-SS0B70EB09E	simple:P04085	simple:P16234	ENSG00000197461	ENSG00000134853	curated	TRUE	FALSE	1.227 | 1.0	0.045 | 1.0	0.719 | 1.0	0.799 | 1.0	0.058 | 1.0	0.454 | 1.0	0.691 | 1.0	0.963 | 0.0	0.221 | 1.0	0.618 | 0.996	0.855 | 0.0	1.375 | 0.0	0.193 | 1.0	0.867 | 0.0	0.811 | 1.0	0.07 | 1.0	0.466 | 1.0	0.703 | 1.0	1.223 | 1.0	0.042 | 1.0	0.716 | 1.0	0.802 | 1.0	0.061 | 1.0	0.457 | 1.0	0.694 | 1.0
PDGFB_PDGFRB	CPI-SS05A26A1DE	simple:P01127	simple:P09619	ENSG00000100311	ENSG00000113721	curated	TRUE	FALSE	0.178 | 1.0	0.013 | 1.0	0.207 | 1.0	0.498 | 1.0	0.039 | 1.0	0.269 | 1.0	0.227 | 1.0	0.509 | 1.0	0.049 | 1.0	0.28 | 1.0	0.238 | 1.0	0.194 | 1.0	0.029 | 1.0	0.223 | 1.0	0.499 | 1.0	0.039 | 1.0	0.27 | 1.0	0.228 | 1.0	0.178 | 1.0	0.013 | 1.0	0.208 | 1.0	0.498 | 1.0	0.039 | 1.0	0.269 | 1.0	0.227 | 1.0
PDGFD_PDGFRB	CPI-SS0B3C76C9D	simple:Q9GZP0	simple:P09619	ENSG00000170962	ENSG00000113721	curated	TRUE	FALSE	0.216 | 1.0	0.052 | 1.0	0.246 | 1.0	0.512 | 1.0	0.052 | 1.0	0.282 | 1.0	0.24 | 1.0	0.52 | 1.0	0.061 | 1.0	0.291 | 1.0	0.249 | 1.0	0.202 | 1.0	0.037 | 1.0	0.232 | 1.0	0.525 | 1.0	0.065 | 1.0	0.296 | 1.0	0.253 | 1.0	0.228 | 1.0	0.064 | 1.0	0.258 | 1.0	0.528 | 1.0	0.068 | 1.0	0.298 | 1.0	0.256 | 1.0
CD44_HGF	CPI-SS04AC18710	simple:P16070	simple:P14210	ENSG00000026508	ENSG00000019991	IntAct	TRUE	FALSE	0.016 | 1.0	0.013 | 1.0	0.022 | 1.0	0.055 | 1.0	0.012 | 1.0	0.012 | 1.0	0.047 | 1.0	0.084 | 1.0	0.04 | 1.0	0.04 | 1.0	0.076 | 1.0	0.025 | 1.0	0.023 | 1.0	0.031 | 1.0	0.075 | 1.0	0.031 | 1.0	0.032 | 1.0	0.067 | 1.0	0.032 | 1.0	0.029 | 1.0	0.038 | 1.0	0.058 | 1.0	0.014 | 1.0	0.015 | 1.0	0.05 | 1.0
WNT3_FZD7	CPI-SS0E396ACB7	simple:P56703	simple:O75084	ENSG00000108379	ENSG00000155760	curated	TRUE	FALSE	0.002 | 1.0	0.0 | 1.0	0.0 | 1.0	0.0 | 1.0	0.0 | 1.0	0.0 | 1.0	0.0 | 1.0	0.0 | 1.0	0.0 | 1.0	0.0 | 1.0	0.0 | 1.0	0.0 | 1.0	0.0 | 1.0	0.0 | 1.0	0.0 | 1.0	0.0 | 1.0	0.0 | 1.0	0.0 | 1.0	0.0 | 1.0	0.0 | 1.0	0.0 | 1.0	0.0 | 1.0	0.0 | 1.0	0.0 | 1.0	0.0 | 1.0
WNT2_FZD4	CPI-SS0C2561156	simple:P09544	simple:Q9ULV1	ENSG00000105989	ENSG00000174804	curated	TRUE	FALSE	0.003 | 1.0	0.005 | 1.0	0.049 | 1.0	0.003 | 1.0	0.008 | 1.0	0.03 | 1.0	0.01 | 1.0	0.003 | 1.0	0.008 | 1.0	0.029 | 1.0	0.01 | 1.0	0.0 | 1.0	0.0 | 1.0	0.0 | 1.0	0.0 | 1.0	0.0 | 1.0	0.0 | 1.0	0.0 | 1.0	0.0 | 1.0	0.0 | 1.0	0.0 | 1.0	0.003 | 1.0	0.007 | 1.0	0.029 | 1.0	0.01 | 1.0
WNT7B_FZD4	CPI-SS0B8083B44	simple:P56706	simple:Q9ULV1	ENSG00000188064	ENSG00000174804	curated	TRUE	FALSE	0.005 | 1.0	0.006 | 1.0	0.05 | 1.0	0.004 | 1.0	0.009 | 1.0	0.031 | 1.0	0.011 | 1.0	0.037 | 1.0	0.042 | 1.0	0.064 | 1.0	0.044 | 1.0	0.048 | 1.0	0.05 | 1.0	0.094 | 1.0	0.0 | 1.0	0.0 | 1.0	0.0 | 1.0	0.0 | 1.0	0.004 | 1.0	0.005 | 1.0	0.049 | 1.0	0.004 | 1.0	0.009 | 1.0	0.031 | 1.0	0.011 | 1.0
WNT2B_FZD4	CPI-SS01469637C	simple:Q93097	simple:Q9ULV1	ENSG00000134245	ENSG00000174804	curated	TRUE	FALSE	0.006 | 1.0	0.007 | 1.0	0.051 | 1.0	0.006 | 1.0	0.011 | 1.0	0.032 | 1.0	0.013 | 1.0	0.0 | 1.0	0.0 | 1.0	0.0 | 1.0	0.0 | 1.0	0.0 | 1.0	0.0 | 1.0	0.0 | 1.0	0.006 | 1.0	0.01 | 1.0	0.032 | 1.0	0.013 | 1.0	0.006 | 1.0	0.007 | 1.0	0.051 | 1.0	0.011 | 1.0	0.015 | 1.0	0.037 | 1.0	0.018 | 1.0
WNT2_FZD9	CPI-SS0AE4A66E2	simple:P09544	simple:O00144	ENSG00000105989	ENSG00000188763	curated	TRUE	FALSE	0.004 | 1.0	0.003 | 1.0	0.0 | 1.0	0.0 | 1.0	0.0 | 1.0	0.002 | 1.0	0.002 | 1.0	0.0 | 1.0	0.0 | 1.0	0.002 | 1.0	0.002 | 1.0	0.0 | 1.0	0.0 | 1.0	0.0 | 1.0	0.0 | 1.0	0.0 | 1.0	0.0 | 1.0	0.0 | 1.0	0.0 | 1.0	0.0 | 1.0	0.0 | 1.0	0.0 | 1.0	0.0 | 1.0	0.002 | 1.0	0.002 | 1.0
SEMA4A_PLXND1	CPI-SS044C72D0D	simple:Q9H3S1	simple:Q9Y4D7	ENSG00000196189	ENSG00000004399	curated	FALSE	FALSE	0.03 | 1.0	0.012 | 1.0	0.036 | 1.0	0.04 | 1.0	0.018 | 1.0	0.048 | 1.0	0.025 | 1.0	0.045 | 1.0	0.024 | 1.0	0.054 | 1.0	0.03 | 1.0	0.04 | 1.0	0.023 | 1.0	0.047 | 1.0	0.034 | 1.0	0.012 | 1.0	0.042 | 1.0	0.019 | 1.0	0.023 | 1.0	0.005 | 1.0	0.029 | 1.0	0.033 | 1.0	0.011 | 1.0	0.041 | 1.0	0.018 | 1.0
SEMA3E_PLXND1	CPI-SS0F3A089DE	simple:O15041	simple:Q9Y4D7	ENSG00000170381	ENSG00000004399	curated	TRUE	FALSE	0.022 | 1.0	0.005 | 1.0	0.029 | 1.0	0.0 | 1.0	0.0 | 1.0	0.0 | 1.0	0.0 | 1.0	0.029 | 1.0	0.008 | 1.0	0.038 | 1.0	0.014 | 1.0	0.034 | 1.0	0.017 | 1.0	0.041 | 1.0	0.028 | 1.0	0.007 | 1.0	0.037 | 1.0	0.014 | 1.0	0.026 | 1.0	0.008 | 1.0	0.032 | 1.0	0.0 | 1.0	0.0 | 1.0	0.0 | 1.0	0.0 | 1.0
SEMA4D_PLXNB1	CPI-SS0606E97F0	simple:Q92854	simple:O43157	ENSG00000187764	ENSG00000164050	curated	TRUE	FALSE	0.005 | 1.0	0.0 | 1.0	0.006 | 1.0	0.003 | 1.0	0.006 | 1.0	0.005 | 1.0	0.004 | 1.0	0.004 | 1.0	0.007 | 1.0	0.007 | 1.0	0.005 | 1.0	0.003 | 1.0	0.0 | 1.0	0.004 | 1.0	0.002 | 1.0	0.005 | 1.0	0.004 | 1.0	0.003 | 1.0	0.004 | 1.0	0.0 | 1.0	0.005 | 1.0	0.002 | 1.0	0.005 | 1.0	0.005 | 1.0	0.003 | 1.0
SEMA4D_CD72	CPI-SS0BC7F3EB5	simple:Q92854	simple:P21854	ENSG00000187764	ENSG00000137101	curated	FALSE	FALSE	0.005 | 1.0	0.006 | 1.0	0.0 | 1.0	0.003 | 1.0	0.0 | 1.0	0.003 | 1.0	0.002 | 1.0	0.004 | 1.0	0.0 | 1.0	0.004 | 1.0	0.003 | 1.0	0.003 | 1.0	0.004 | 1.0	0.0 | 1.0	0.002 | 1.0	0.0 | 1.0	0.001 | 1.0	0.001 | 1.0	0.004 | 1.0	0.005 | 1.0	0.0 | 1.0	0.002 | 1.0	0.0 | 1.0	0.002 | 1.0	0.002 | 1.0
SELP_SELPLG	CPI-SS02B7540B0	simple:P16109	simple:Q14242	ENSG00000174175	ENSG00000110876	curated	FALSE	FALSE	0.0 | 1.0	0.0 | 1.0	0.0 | 1.0	0.0 | 1.0	0.0 | 1.0	0.0 | 1.0	0.0 | 1.0	0.004 | 1.0	0.0 | 1.0	0.0 | 1.0	0.0 | 1.0	0.0 | 1.0	0.0 | 1.0	0.0 | 1.0	0.003 | 1.0	0.0 | 1.0	0.0 | 1.0	0.0 | 1.0	0.0 | 1.0	0.0 | 1.0	0.0 | 1.0	0.002 | 1.0	0.0 | 1.0	0.0 | 1.0	0.0 | 1.0
SELL_SELPLG	CPI-SS087321EB5	simple:P14151	simple:Q14242	ENSG00000188404	ENSG00000110876	curated	FALSE	FALSE	0.0 | 1.0	0.0 | 1.0	0.0 | 1.0	0.001 | 1.0	0.0 | 1.0	0.0 | 1.0	0.0 | 1.0	0.0 | 1.0	0.0 | 1.0	0.0 | 1.0	0.0 | 1.0	0.0 | 1.0	0.0 | 1.0	0.0 | 1.0	0.001 | 1.0	0.0 | 1.0	0.0 | 1.0	0.0 | 1.0	0.0 | 1.0	0.0 | 1.0	0.0 | 1.0	0.002 | 1.0	0.0 | 1.0	0.0 | 1.0	0.0 | 1.0
SELL_CD34	CPI-SS0EB5AEC83	simple:P14151	simple:P28906	ENSG00000188404	ENSG00000174059	curated	FALSE	FALSE	0.002 | 1.0	0.0 | 1.0	0.0 | 1.0	0.002 | 1.0	0.0 | 1.0	0.001 | 1.0	0.002 | 1.0	0.0 | 1.0	0.0 | 1.0	0.0 | 1.0	0.0 | 1.0	0.0 | 1.0	0.0 | 1.0	0.0 | 1.0	0.002 | 1.0	0.0 | 1.0	0.001 | 1.0	0.002 | 1.0	0.0 | 1.0	0.0 | 1.0	0.0 | 1.0	0.003 | 1.0	0.0 | 1.0	0.003 | 1.0	0.003 | 1.0
SELL_PODXL	CPI-SS04FDFE943	simple:P14151	simple:O00592	ENSG00000188404	ENSG00000128567	curated	FALSE	FALSE	0.025 | 1.0	0.069 | 1.0	0.005 | 1.0	0.008 | 1.0	0.095 | 1.0	0.008 | 1.0	0.01 | 1.0	0.0 | 1.0	0.0 | 1.0	0.0 | 1.0	0.0 | 1.0	0.0 | 1.0	0.0 | 1.0	0.0 | 1.0	0.009 | 1.0	0.095 | 1.0	0.009 | 1.0	0.01 | 1.0	0.0 | 1.0	0.0 | 1.0	0.0 | 1.0	0.01 | 1.0	0.096 | 1.0	0.01 | 1.0	0.011 | 1.0
GHRL_TBXA2R	CPI-SS07A178C01	simple:Q9UBU3	simple:P21731	ENSG00000157017	ENSG00000006638	InnateDB-All	TRUE	FALSE	0.012 | 1.0	0.006 | 1.0	0.025 | 1.0	0.0 | 1.0	0.0 | 1.0	0.0 | 1.0	0.0 | 1.0	0.0 | 1.0	0.0 | 1.0	0.0 | 1.0	0.0 | 1.0	0.0 | 1.0	0.0 | 1.0	0.0 | 1.0	0.0 | 1.0	0.0 | 1.0	0.0 | 1.0	0.0 | 1.0	0.0 | 1.0	0.0 | 1.0	0.0 | 1.0	0.006 | 1.0	0.008 | 1.0	0.015 | 1.0	0.006 | 1.0
GHRL_PTGIR	CPI-SS00F32F8C0	simple:Q9UBU3	simple:P43119	ENSG00000157017	ENSG00000160013	InnateDB-All	TRUE	FALSE	0.005 | 1.0	0.004 | 1.0	0.009 | 1.0	0.0 | 1.0	0.0 | 1.0	0.0 | 1.0	0.0 | 1.0	0.0 | 1.0	0.0 | 1.0	0.0 | 1.0	0.0 | 1.0	0.0 | 1.0	0.0 | 1.0	0.0 | 1.0	0.0 | 1.0	0.0 | 1.0	0.0 | 1.0	0.0 | 1.0	0.0 | 1.0	0.0 | 1.0	0.0 | 1.0	0.002 | 1.0	0.002 | 1.0	0.014 | 1.0	0.002 | 1.0
GHRL_GHSR	CPI-SS0DE3B267F	simple:Q9UBU3	simple:Q92847	ENSG00000157017	ENSG00000121853	guidetopharmacology.org	TRUE	FALSE	0.002 | 1.0	0.0 | 1.0	0.0 | 1.0	0.0 | 1.0	0.0 | 1.0	0.0 | 1.0	0.0 | 1.0	0.0 | 1.0	0.0 | 1.0	0.0 | 1.0	0.0 | 1.0	0.0 | 1.0	0.0 | 1.0	0.0 | 1.0	0.0 | 1.0	0.0 | 1.0	0.0 | 1.0	0.0 | 1.0	0.0 | 1.0	0.0 | 1.0	0.0 | 1.0	0.0 | 1.0	0.0 | 1.0	0.0 | 1.0	0.0 | 1.0
GHRL_PTGER3	CPI-SS09EF9F821	simple:Q9UBU3	simple:P43115	ENSG00000157017	ENSG00000050628	InnateDB-All	TRUE	FALSE	0.153 | 1.0	0.008 | 1.0	0.13 | 1.0	0.0 | 1.0	0.0 | 1.0	0.0 | 1.0	0.0 | 1.0	0.0 | 1.0	0.0 | 1.0	0.0 | 1.0	0.0 | 1.0	0.0 | 1.0	0.0 | 1.0	0.0 | 1.0	0.0 | 1.0	0.0 | 1.0	0.0 | 1.0	0.0 | 1.0	0.0 | 1.0	0.0 | 1.0	0.0 | 1.0	0.191 | 1.0	0.021 | 1.0	0.124 | 1.0	0.067 | 1.0
ROR1_NGF	CPI-SS0F558C3B7	simple:Q01973	simple:P01138	ENSG00000185483	ENSG00000134259	InnateDB-All	TRUE	FALSE	0.096 | 1.0	0.065 | 1.0	0.088 | 1.0	0.052 | 1.0	0.045 | 1.0	0.062 | 1.0	0.053 | 1.0	0.032 | 1.0	0.025 | 1.0	0.042 | 1.0	0.033 | 1.0	0.129 | 1.0	0.098 | 1.0	0.121 | 1.0	0.104 | 1.0	0.098 | 1.0	0.115 | 1.0	0.105 | 1.0	0.088 | 1.0	0.056 | 1.0	0.079 | 1.0	0.043 | 1.0	0.037 | 1.0	0.054 | 1.0	0.044 | 1.0
ROR1_WNT5A	CPI-SS01D725385	simple:Q01973	simple:P41221	ENSG00000185483	ENSG00000114251	InnateDB-All	TRUE	FALSE	0.34 | 1.0	0.129 | 1.0	0.192 | 1.0	0.164 | 1.0	0.092 | 1.0	0.172 | 1.0	0.149 | 1.0	0.145 | 1.0	0.072 | 1.0	0.152 | 1.0	0.129 | 1.0	0.373 | 0.0	0.162 | 1.0	0.225 | 0.031	0.217 | 0.012	0.145 | 1.0	0.225 | 0.003	0.201 | 0.111	0.332 | 1.0	0.121 | 1.0	0.184 | 1.0	0.156 | 1.0	0.084 | 1.0	0.163 | 1.0	0.14 | 1.0
FZD1_WNT5A	CPI-SS0B836353B	simple:Q9UP38	simple:P41221	ENSG00000157240	ENSG00000114251	curated	TRUE	FALSE	0.574 | 0.0	0.364 | 1.0	0.427 | 0.0	0.281 | 0.996	0.208 | 1.0	0.288 | 0.988	0.265 | 1.0	0.292 | 0.96	0.22 | 1.0	0.3 | 0.901	0.276 | 0.996	0.414 | 0.0	0.203 | 1.0	0.266 | 0.981	0.349 | 0.064	0.277 | 1.0	0.357 | 0.032	0.333 | 0.283	0.498 | 0.0	0.287 | 1.0	0.35 | 0.108	0.242 | 1.0	0.17 | 1.0	0.249 | 1.0	0.226 | 1.0
FZD1_WNT3A	CPI-SS0B329BDB7	simple:Q9UP38	simple:P56704	ENSG00000157240	ENSG00000154342	InnateDB-All	TRUE	FALSE	0.297 | 1.0	0.0 | 1.0	0.0 | 1.0	0.158 | 1.0	0.0 | 1.0	0.0 | 1.0	0.158 | 1.0	0.17 | 1.0	0.0 | 1.0	0.0 | 1.0	0.17 | 1.0	0.136 | 1.0	0.0 | 1.0	0.0 | 1.0	0.227 | 1.0	0.0 | 1.0	0.0 | 1.0	0.227 | 1.0	0.22 | 1.0	0.0 | 1.0	0.0 | 1.0	0.12 | 1.0	0.0 | 1.0	0.0 | 1.0	0.12 | 1.0
RYK_WNT3A	CPI-SS0A91954A0	simple:P34925	simple:P56704	ENSG00000163785	ENSG00000154342	InnateDB-All	TRUE	FALSE	0.033 | 1.0	0.0 | 1.0	0.0 | 1.0	0.034 | 1.0	0.0 | 1.0	0.0 | 1.0	0.034 | 1.0	0.044 | 1.0	0.0 | 1.0	0.0 | 1.0	0.044 | 1.0	0.02 | 1.0	0.0 | 1.0	0.0 | 1.0	0.031 | 1.0	0.0 | 1.0	0.0 | 1.0	0.031 | 1.0	0.037 | 1.0	0.0 | 1.0	0.0 | 1.0	0.019 | 1.0	0.0 | 1.0	0.0 | 1.0	0.019 | 1.0
KITLG_KIT	CPI-SS0A612BCEF	simple:P21583	simple:P10721	ENSG00000049130	ENSG00000157404	curated	TRUE	FALSE	0.065 | 1.0	0.027 | 1.0	0.023 | 1.0	0.028 | 1.0	0.04 | 1.0	0.034 | 1.0	0.03 | 1.0	0.124 | 1.0	0.135 | 1.0	0.13 | 1.0	0.126 | 1.0	0.119 | 1.0	0.081 | 1.0	0.077 | 1.0	0.021 | 1.0	0.032 | 1.0	0.027 | 1.0	0.022 | 1.0	0.071 | 1.0	0.032 | 1.0	0.028 | 1.0	0.028 | 1.0	0.039 | 1.0	0.033 | 1.0	0.029 | 1.0
LTBR_LTA	CPI-SS04EE6599C	simple:P36941	simple:P01374	ENSG00000111321	ENSG00000226979	InnateDB-All	TRUE	FALSE	0.09 | 1.0	0.0 | 1.0	0.0 | 1.0	0.122 | 1.0	0.121 | 1.0	0.0 | 1.0	0.121 | 1.0	0.126 | 1.0	0.126 | 1.0	0.0 | 1.0	0.126 | 1.0	0.083 | 1.0	0.0 | 1.0	0.0 | 1.0	0.078 | 1.0	0.078 | 1.0	0.0 | 1.0	0.078 | 1.0	0.062 | 1.0	0.0 | 1.0	0.0 | 1.0	0.09 | 1.0	0.089 | 1.0	0.0 | 1.0	0.089 | 1.0
NCR3_BAG6	CPI-SS027AFFC0E	simple:O14931	simple:P46379	ENSG00000204475	ENSG00000204463	curated	FALSE	FALSE	0.059 | 1.0	0.096 | 1.0	0.045 | 1.0	0.0 | 1.0	0.0 | 1.0	0.0 | 1.0	0.0 | 1.0	0.044 | 1.0	0.085 | 1.0	0.038 | 1.0	0.034 | 1.0	0.063 | 1.0	0.1 | 1.0	0.049 | 1.0	0.04 | 1.0	0.081 | 1.0	0.033 | 1.0	0.029 | 1.0	0.0 | 1.0	0.0 | 1.0	0.0 | 1.0	0.041 | 1.0	0.082 | 1.0	0.034 | 1.0	0.03 | 1.0
SEMA5A_PLXNB3	CPI-SS0D00AAD2F	simple:Q13591	simple:Q9ULL4	ENSG00000112902	ENSG00000198753	curated	FALSE	FALSE	0.226 | 1.0	0.0 | 1.0	0.0 | 1.0	0.414 | 1.0	0.0 | 1.0	0.415 | 1.0	0.0 | 1.0	0.047 | 1.0	0.0 | 1.0	0.048 | 1.0	0.0 | 1.0	0.026 | 1.0	0.0 | 1.0	0.0 | 1.0	0.2 | 1.0	0.0 | 1.0	0.201 | 1.0	0.0 | 1.0	0.237 | 1.0	0.0 | 1.0	0.0 | 1.0	0.312 | 1.0	0.0 | 1.0	0.313 | 1.0	0.0 | 1.0
CD99_PILRA	CPI-SS01560CA22	simple:P14209	simple:Q9UKJ1	ENSG00000002586	ENSG00000085514	curated	TRUE	FALSE	0.081 | 1.0	0.087 | 1.0	0.078 | 1.0	0.105 | 1.0	0.109 | 1.0	0.101 | 1.0	0.103 | 1.0	0.091 | 1.0	0.095 | 1.0	0.087 | 1.0	0.09 | 1.0	0.052 | 1.0	0.058 | 1.0	0.05 | 1.0	0.108 | 1.0	0.112 | 1.0	0.104 | 1.0	0.107 | 1.0	0.118 | 1.0	0.124 | 1.0	0.116 | 1.0	0.091 | 1.0	0.094 | 1.0	0.087 | 1.0	0.089 | 1.0
FSHB_FSHR	CPI-SS035A3ADDF	simple:P01225	simple:P23945	ENSG00000131808	ENSG00000170820	IntAct	TRUE	FALSE	0.002 | 1.0	0.003 | 1.0	0.0 | 1.0	0.002 | 1.0	0.002 | 1.0	0.002 | 1.0	0.002 | 1.0	0.0 | 1.0	0.0 | 1.0	0.0 | 1.0	0.0 | 1.0	0.0 | 1.0	0.0 | 1.0	0.0 | 1.0	0.003 | 1.0	0.003 | 1.0	0.003 | 1.0	0.003 | 1.0	0.003 | 1.0	0.003 | 1.0	0.0 | 1.0	0.002 | 1.0	0.002 | 1.0	0.002 | 1.0	0.002 | 1.0
PENK_MRGPRX1	CPI-SS06AC5AF53	simple:P01210	simple:Q96LB2	ENSG00000181195	ENSG00000170255	guidetopharmacology.org	TRUE	FALSE	0.004 | 1.0	0.005 | 1.0	0.0 | 1.0	0.012 | 1.0	0.0 | 1.0	0.012 | 1.0	0.012 | 1.0	0.002 | 1.0	0.0 | 1.0	0.002 | 1.0	0.003 | 1.0	0.009 | 1.0	0.01 | 1.0	0.0 | 1.0	0.073 | 1.0	0.0 | 1.0	0.073 | 1.0	0.074 | 1.0	0.147 | 1.0	0.148 | 1.0	0.0 | 1.0	0.012 | 1.0	0.0 | 1.0	0.012 | 1.0	0.012 | 1.0
ENTPD1_ADORA1	CPI-SS026C7F8A2	simple:P49961	simple:P30542	ENSG00000138185	ENSG00000163485	curated	FALSE	FALSE	0.034 | 1.0	0.036 | 1.0	0.035 | 1.0	0.136 | 1.0	0.0 | 1.0	0.0 | 1.0	0.133 | 1.0	0.033 | 1.0	0.0 | 1.0	0.0 | 1.0	0.03 | 1.0	0.005 | 1.0	0.006 | 1.0	0.005 | 1.0	0.041 | 1.0	0.0 | 1.0	0.0 | 1.0	0.038 | 1.0	0.029 | 1.0	0.03 | 1.0	0.029 | 1.0	0.057 | 1.0	0.0 | 1.0	0.0 | 1.0	0.054 | 1.0
ENTPD1_ADORA2A	CPI-SS0E90C46BC	simple:P49961	simple:P29274	ENSG00000138185	ENSG00000128271	curated	FALSE	FALSE	0.043 | 1.0	0.036 | 1.0	0.036 | 1.0	0.163 | 1.0	0.133 | 1.0	0.136 | 1.0	0.142 | 1.0	0.06 | 1.0	0.03 | 1.0	0.032 | 1.0	0.038 | 1.0	0.013 | 1.0	0.006 | 1.0	0.006 | 1.0	0.068 | 1.0	0.038 | 1.0	0.041 | 1.0	0.047 | 1.0	0.037 | 1.0	0.03 | 1.0	0.03 | 1.0	0.084 | 1.0	0.054 | 1.0	0.056 | 1.0	0.062 | 1.0
ENTPD1_ADORA2B	CPI-SS08C884E97	simple:P49961	simple:P29275	ENSG00000138185	ENSG00000170425	curated	FALSE	FALSE	0.038 | 1.0	0.0 | 1.0	0.038 | 1.0	0.148 | 1.0	0.137 | 1.0	0.139 | 1.0	0.14 | 1.0	0.044 | 1.0	0.033 | 1.0	0.035 | 1.0	0.037 | 1.0	0.008 | 1.0	0.0 | 1.0	0.008 | 1.0	0.053 | 1.0	0.042 | 1.0	0.044 | 1.0	0.045 | 1.0	0.033 | 1.0	0.0 | 1.0	0.032 | 1.0	0.068 | 1.0	0.057 | 1.0	0.059 | 1.0	0.061 | 1.0
ENTPD1_ADORA3	CPI-SS0276D5C7E	simple:P49961	simple:P0DMS8	ENSG00000138185	ENSG00000282608	curated	FALSE	FALSE	0.0 | 1.0	0.0 | 1.0	0.0 | 1.0	0.0 | 1.0	0.133 | 1.0	0.0 | 1.0	0.132 | 1.0	0.0 | 1.0	0.03 | 1.0	0.0 | 1.0	0.029 | 1.0	0.0 | 1.0	0.0 | 1.0	0.0 | 1.0	0.0 | 1.0	0.038 | 1.0	0.0 | 1.0	0.037 | 1.0	0.0 | 1.0	0.0 | 1.0	0.0 | 1.0	0.0 | 1.0	0.054 | 1.0	0.0 | 1.0	0.053 | 1.0
CD70_CD27	CPI-SS01999882C	simple:P32970	simple:P26842	ENSG00000125726	ENSG00000139193	curated	TRUE	FALSE	0.011 | 1.0	0.003 | 1.0	0.003 | 1.0	0.0 | 1.0	0.0 | 1.0	0.0 | 1.0	0.0 | 1.0	0.0 | 1.0	0.0 | 1.0	0.0 | 1.0	0.0 | 1.0	0.0 | 1.0	0.0 | 1.0	0.0 | 1.0	0.0 | 1.0	0.0 | 1.0	0.0 | 1.0	0.0 | 1.0	0.011 | 1.0	0.003 | 1.0	0.003 | 1.0	0.0 | 1.0	0.0 | 1.0	0.0 | 1.0	0.0 | 1.0
TGFB2_TGFBR3	CPI-SS0178F5C45	simple:P61812	simple:Q03167	ENSG00000092969	ENSG00000069702	curated	TRUE	FALSE	0.077 | 1.0	0.063 | 1.0	0.333 | 1.0	0.081 | 1.0	0.049 | 1.0	0.237 | 1.0	0.132 | 1.0	0.084 | 1.0	0.053 | 1.0	0.241 | 1.0	0.136 | 1.0	0.038 | 1.0	0.025 | 1.0	0.294 | 1.0	0.104 | 1.0	0.072 | 1.0	0.261 | 1.0	0.156 | 1.0	0.115 | 1.0	0.102 | 1.0	0.372 | 0.0	0.104 | 1.0	0.072 | 1.0	0.26 | 1.0	0.155 | 1.0
GAL_GALR1	CPI-SS0BE567EFB	simple:P22466	simple:P47211	ENSG00000069482	ENSG00000166573	guidetopharmacology.org	TRUE	FALSE	0.0 | 1.0	0.0 | 1.0	0.0 | 1.0	0.006 | 1.0	0.006 | 1.0	0.006 | 1.0	0.006 | 1.0	0.004 | 1.0	0.004 | 1.0	0.004 | 1.0	0.003 | 1.0	0.0 | 1.0	0.0 | 1.0	0.0 | 1.0	0.005 | 1.0	0.006 | 1.0	0.006 | 1.0	0.005 | 1.0	0.0 | 1.0	0.0 | 1.0	0.0 | 1.0	0.005 | 1.0	0.005 | 1.0	0.005 | 1.0	0.005 | 1.0
GALP_GALR1	CPI-SS0F4D3206E	simple:Q9UBC7	simple:P47211	ENSG00000197487	ENSG00000166573	guidetopharmacology.org	TRUE	FALSE	0.0 | 1.0	0.0 | 1.0	0.0 | 1.0	0.003 | 1.0	0.003 | 1.0	0.003 | 1.0	0.003 | 1.0	0.002 | 1.0	0.002 | 1.0	0.002 | 1.0	0.002 | 1.0	0.0 | 1.0	0.0 | 1.0	0.0 | 1.0	0.003 | 1.0	0.003 | 1.0	0.003 | 1.0	0.003 | 1.0	0.0 | 1.0	0.0 | 1.0	0.0 | 1.0	0.003 | 1.0	0.003 | 1.0	0.003 | 1.0	0.003 | 1.0
GAL_GALR2	CPI-SS04BCE85CA	simple:P22466	simple:O43603	ENSG00000069482	ENSG00000182687	guidetopharmacology.org	TRUE	FALSE	0.01 | 1.0	0.006 | 1.0	0.018 | 1.0	0.029 | 1.0	0.009 | 1.0	0.029 | 1.0	0.048 | 1.0	0.027 | 1.0	0.007 | 1.0	0.027 | 1.0	0.046 | 1.0	0.008 | 1.0	0.004 | 1.0	0.017 | 1.0	0.029 | 1.0	0.009 | 1.0	0.029 | 1.0	0.048 | 1.0	0.009 | 1.0	0.005 | 1.0	0.018 | 1.0	0.028 | 1.0	0.008 | 1.0	0.028 | 1.0	0.047 | 1.0
GALP_GALR2	CPI-SS0FDCE3128	simple:Q9UBC7	simple:O43603	ENSG00000197487	ENSG00000182687	guidetopharmacology.org	TRUE	FALSE	0.011 | 1.0	0.007 | 1.0	0.02 | 1.0	0.027 | 1.0	0.006 | 1.0	0.026 | 1.0	0.045 | 1.0	0.026 | 1.0	0.005 | 1.0	0.025 | 1.0	0.045 | 1.0	0.014 | 1.0	0.01 | 1.0	0.023 | 1.0	0.026 | 1.0	0.006 | 1.0	0.026 | 1.0	0.045 | 1.0	0.01 | 1.0	0.006 | 1.0	0.019 | 1.0	0.027 | 1.0	0.006 | 1.0	0.026 | 1.0	0.045 | 1.0
GAL_GALR3	CPI-SS0442ADAA5	simple:P22466	simple:O60755	ENSG00000069482	ENSG00000128310	guidetopharmacology.org	TRUE	FALSE	0.004 | 1.0	0.0 | 1.0	0.006 | 1.0	0.006 | 1.0	0.0 | 1.0	0.0 | 1.0	0.006 | 1.0	0.004 | 1.0	0.0 | 1.0	0.0 | 1.0	0.003 | 1.0	0.003 | 1.0	0.0 | 1.0	0.004 | 1.0	0.005 | 1.0	0.0 | 1.0	0.0 | 1.0	0.005 | 1.0	0.004 | 1.0	0.0 | 1.0	0.005 | 1.0	0.005 | 1.0	0.0 | 1.0	0.0 | 1.0	0.005 | 1.0
GALP_GALR3	CPI-SS0B11567AF	simple:Q9UBC7	simple:O60755	ENSG00000197487	ENSG00000128310	guidetopharmacology.org	TRUE	FALSE	0.005 | 1.0	0.0 | 1.0	0.007 | 1.0	0.003 | 1.0	0.0 | 1.0	0.0 | 1.0	0.003 | 1.0	0.002 | 1.0	0.0 | 1.0	0.0 | 1.0	0.002 | 1.0	0.009 | 1.0	0.0 | 1.0	0.01 | 1.0	0.003 | 1.0	0.0 | 1.0	0.0 | 1.0	0.003 | 1.0	0.005 | 1.0	0.0 | 1.0	0.006 | 1.0	0.003 | 1.0	0.0 | 1.0	0.0 | 1.0	0.003 | 1.0
GUCA2B_GUCY2C	CPI-SS01B7CB0E7	simple:Q16661	simple:P25092	ENSG00000044012	ENSG00000070019	guidetopharmacology.org	TRUE	FALSE	0.003 | 1.0	0.003 | 1.0	0.005 | 1.0	0.002 | 1.0	0.003 | 1.0	0.004 | 1.0	0.002 | 1.0	0.0 | 1.0	0.0 | 1.0	0.0 | 1.0	0.0 | 1.0	0.0 | 1.0	0.0 | 1.0	0.0 | 1.0	0.0 | 1.0	0.0 | 1.0	0.0 | 1.0	0.0 | 1.0	0.0 | 1.0	0.0 | 1.0	0.0 | 1.0	0.003 | 1.0	0.003 | 1.0	0.004 | 1.0	0.003 | 1.0
GUCA2B_STAR	CPI-SS01B7CB0E7	simple:Q16661	simple:P25092	ENSG00000044012	ENSG00000147465	guidetopharmacology.org	TRUE	FALSE	0.002 | 1.0	0.003 | 1.0	0.0 | 1.0	0.001 | 1.0	0.0 | 1.0	0.0 | 1.0	0.001 | 1.0	0.0 | 1.0	0.0 | 1.0	0.0 | 1.0	0.0 | 1.0	0.0 | 1.0	0.0 | 1.0	0.0 | 1.0	0.0 | 1.0	0.0 | 1.0	0.0 | 1.0	0.0 | 1.0	0.0 | 1.0	0.0 | 1.0	0.0 | 1.0	0.002 | 1.0	0.0 | 1.0	0.0 | 1.0	0.002 | 1.0
GUCA2A_GUCY2C	CPI-SS08BF22309	simple:Q02747	simple:P25092	ENSG00000197273	ENSG00000070019	guidetopharmacology.org	TRUE	FALSE	0.005 | 1.0	0.005 | 1.0	0.007 | 1.0	0.003 | 1.0	0.004 | 1.0	0.004 | 1.0	0.003 | 1.0	0.004 | 1.0	0.005 | 1.0	0.005 | 1.0	0.004 | 1.0	0.005 | 1.0	0.004 | 1.0	0.006 | 1.0	0.002 | 1.0	0.003 | 1.0	0.004 | 1.0	0.002 | 1.0	0.0 | 1.0	0.0 | 1.0	0.0 | 1.0	0.003 | 1.0	0.004 | 1.0	0.004 | 1.0	0.003 | 1.0
GUCA2A_STAR	CPI-SS08BF22309	simple:Q02747	simple:P25092	ENSG00000197273	ENSG00000147465	guidetopharmacology.org	TRUE	FALSE	0.004 | 1.0	0.005 | 1.0	0.0 | 1.0	0.002 | 1.0	0.0 | 1.0	0.0 | 1.0	0.002 | 1.0	0.003 | 1.0	0.0 | 1.0	0.0 | 1.0	0.003 | 1.0	0.003 | 1.0	0.004 | 1.0	0.0 | 1.0	0.001 | 1.0	0.0 | 1.0	0.0 | 1.0	0.001 | 1.0	0.0 | 1.0	0.0 | 1.0	0.0 | 1.0	0.002 | 1.0	0.0 | 1.0	0.0 | 1.0	0.002 | 1.0
CXCR1_PPBP	CPI-SS01CA9A0A6	simple:P25024	simple:P02775	ENSG00000163464	ENSG00000163736	curated	TRUE	FALSE	0.007 | 1.0	0.008 | 1.0	0.007 | 1.0	0.001 | 1.0	0.002 | 1.0	0.0 | 1.0	0.0 | 1.0	0.004 | 1.0	0.005 | 1.0	0.0 | 1.0	0.0 | 1.0	0.007 | 1.0	0.008 | 1.0	0.007 | 1.0	0.0 | 1.0	0.0 | 1.0	0.0 | 1.0	0.0 | 1.0	0.004 | 1.0	0.005 | 1.0	0.004 | 1.0	0.002 | 1.0	0.002 | 1.0	0.0 | 1.0	0.0 | 1.0
HLAE_HUMAN_KLRC1	CPI-SS03EF699C7	simple:P13747	simple:P26715	ENSG00000204592	ENSG00000134545	curated	FALSE	FALSE	0.048 | 1.0	0.049 | 1.0	0.047 | 1.0	0.049 | 1.0	0.05 | 1.0	0.049 | 1.0	0.05 | 1.0	0.347 | 1.0	0.347 | 1.0	0.346 | 1.0	0.347 | 1.0	0.254 | 1.0	0.255 | 1.0	0.253 | 1.0	0.055 | 1.0	0.055 | 1.0	0.055 | 1.0	0.055 | 1.0	0.052 | 1.0	0.053 | 1.0	0.051 | 1.0	0.042 | 1.0	0.042 | 1.0	0.041 | 1.0	0.042 | 1.0
HLAE_HUMAN_KLRK1	CPI-SS03339363E	simple:P13747	simple:P26718	ENSG00000204592	ENSG00000213809	curated	FALSE	FALSE	0.046 | 1.0	0.0 | 1.0	0.047 | 1.0	0.049 | 1.0	0.0 | 1.0	0.049 | 1.0	0.05 | 1.0	0.346 | 1.0	0.0 | 1.0	0.346 | 1.0	0.347 | 1.0	0.252 | 1.0	0.0 | 1.0	0.253 | 1.0	0.055 | 1.0	0.0 | 1.0	0.055 | 1.0	0.055 | 1.0	0.05 | 1.0	0.0 | 1.0	0.051 | 1.0	0.042 | 1.0	0.0 | 1.0	0.041 | 1.0	0.042 | 1.0
IL15_IL15RA	CPI-SS077B160B9	simple:P40933	simple:Q13261	ENSG00000164136	ENSG00000134470	guidetopharmacology.org	TRUE	FALSE	0.023 | 1.0	0.024 | 1.0	0.021 | 1.0	0.035 | 1.0	0.037 | 1.0	0.032 | 1.0	0.037 | 1.0	0.006 | 1.0	0.008 | 1.0	0.003 | 1.0	0.007 | 1.0	0.008 | 1.0	0.008 | 1.0	0.005 | 1.0	0.005 | 1.0	0.007 | 1.0	0.003 | 1.0	0.007 | 1.0	0.006 | 1.0	0.007 | 1.0	0.004 | 1.0	0.012 | 1.0	0.014 | 1.0	0.01 | 1.0	0.014 | 1.0
IL6_HRH1	CPI-SS0DC2A6D35	simple:P05231	simple:P35367	ENSG00000136244	ENSG00000196639	IntAct	TRUE	FALSE	0.003 | 1.0	0.0 | 1.0	0.0 | 1.0	0.001 | 1.0	0.001 | 1.0	0.0 | 1.0	0.0 | 1.0	0.009 | 1.0	0.009 | 1.0	0.0 | 1.0	0.0 | 1.0	0.009 | 1.0	0.0 | 1.0	0.0 | 1.0	0.006 | 1.0	0.006 | 1.0	0.0 | 1.0	0.0 | 1.0	0.012 | 1.0	0.0 | 1.0	0.0 | 1.0	0.001 | 1.0	0.001 | 1.0	0.0 | 1.0	0.0 | 1.0
NPB_NPBWR1	CPI-SS031151895	simple:Q8NG41	simple:P48145	ENSG00000183979	ENSG00000183729	guidetopharmacology.org	TRUE	FALSE	0.0 | 1.0	0.0 | 1.0	0.004 | 1.0	0.0 | 1.0	0.0 | 1.0	0.0 | 1.0	0.001 | 1.0	0.0 | 1.0	0.0 | 1.0	0.0 | 1.0	0.002 | 1.0	0.0 | 1.0	0.0 | 1.0	0.0 | 1.0	0.0 | 1.0	0.0 | 1.0	0.0 | 1.0	0.0 | 1.0	0.0 | 1.0	0.0 | 1.0	0.0 | 1.0	0.0 | 1.0	0.0 | 1.0	0.0 | 1.0	0.002 | 1.0
NPW_NPBWR1	CPI-SS0888931C5	simple:Q8N729	simple:P48145	ENSG00000183971	ENSG00000183729	guidetopharmacology.org	TRUE	FALSE	0.0 | 1.0	0.0 | 1.0	0.002 | 1.0	0.0 | 1.0	0.0 | 1.0	0.0 | 1.0	0.0 | 1.0	0.0 | 1.0	0.0 | 1.0	0.0 | 1.0	0.002 | 1.0	0.0 | 1.0	0.0 | 1.0	0.0 | 1.0	0.0 | 1.0	0.0 | 1.0	0.0 | 1.0	0.0 | 1.0	0.0 | 1.0	0.0 | 1.0	0.0 | 1.0	0.0 | 1.0	0.0 | 1.0	0.0 | 1.0	0.002 | 1.0
CD28_CD86	CPI-SS077D7365D	simple:P10747	simple:P42081	ENSG00000178562	ENSG00000114013	curated	FALSE	FALSE	0.036 | 1.0	0.032 | 1.0	0.016 | 1.0	0.0 | 1.0	0.0 | 1.0	0.0 | 1.0	0.0 | 1.0	0.0 | 1.0	0.0 | 1.0	0.0 | 1.0	0.0 | 1.0	0.0 | 1.0	0.0 | 1.0	0.0 | 1.0	0.008 | 1.0	0.008 | 1.0	0.009 | 1.0	0.014 | 1.0	0.0 | 1.0	0.0 | 1.0	0.0 | 1.0	0.007 | 1.0	0.007 | 1.0	0.008 | 1.0	0.013 | 1.0
GDF15_GFRAL	CPI-SS03A63084F	simple:Q99988	simple:Q6UXV0	ENSG00000130513	ENSG00000187871	guidetopharmacology.org	TRUE	FALSE	0.0 | 1.0	0.0 | 1.0	0.0 | 1.0	0.002 | 1.0	0.0 | 1.0	0.002 | 1.0	0.001 | 1.0	0.028 | 1.0	0.0 | 1.0	0.028 | 1.0	0.027 | 1.0	0.0 | 1.0	0.0 | 1.0	0.0 | 1.0	0.002 | 1.0	0.0 | 1.0	0.002 | 1.0	0.001 | 1.0	0.0 | 1.0	0.0 | 1.0	0.0 | 1.0	0.002 | 1.0	0.0 | 1.0	0.003 | 1.0	0.002 | 1.0
PDF_GFRAL	CPI-SS03A63084F	simple:Q99988	simple:Q6UXV0	ENSG00000258429	ENSG00000187871	guidetopharmacology.org	TRUE	FALSE	0.0 | 1.0	0.0 | 1.0	0.0 | 1.0	0.001 | 1.0	0.0 | 1.0	0.002 | 1.0	0.001 | 1.0	0.004 | 1.0	0.0 | 1.0	0.004 | 1.0	0.003 | 1.0	0.0 | 1.0	0.0 | 1.0	0.0 | 1.0	0.0 | 1.0	0.0 | 1.0	0.0 | 1.0	0.0 | 1.0	0.0 | 1.0	0.0 | 1.0	0.0 | 1.0	0.002 | 1.0	0.0 | 1.0	0.002 | 1.0	0.001 | 1.0
NMU_NMUR1	CPI-SS018BD4882	simple:P48645	simple:Q9HB89	ENSG00000109255	ENSG00000171596	guidetopharmacology.org	TRUE	FALSE	0.0 | 1.0	0.0 | 1.0	0.0 | 1.0	0.001 | 1.0	0.001 | 1.0	0.0 | 1.0	0.0 | 1.0	0.007 | 1.0	0.008 | 1.0	0.0 | 1.0	0.0 | 1.0	0.0 | 1.0	0.0 | 1.0	0.0 | 1.0	0.0 | 1.0	0.0 | 1.0	0.0 | 1.0	0.0 | 1.0	0.0 | 1.0	0.0 | 1.0	0.002 | 1.0	0.001 | 1.0	0.001 | 1.0	0.0 | 1.0	0.0 | 1.0
NMS_NMUR1	CPI-SS0148BDF1C	simple:Q5H8A3	simple:Q9HB89	ENSG00000204640	ENSG00000171596	guidetopharmacology.org	TRUE	FALSE	0.0 | 1.0	0.0 | 1.0	0.002 | 1.0	0.001 | 1.0	0.001 | 1.0	0.0 | 1.0	0.0 | 1.0	0.0 | 1.0	0.0 | 1.0	0.0 | 1.0	0.0 | 1.0	0.0 | 1.0	0.0 | 1.0	0.003 | 1.0	0.001 | 1.0	0.001 | 1.0	0.0 | 1.0	0.0 | 1.0	0.0 | 1.0	0.0 | 1.0	0.002 | 1.0	0.001 | 1.0	0.001 | 1.0	0.0 | 1.0	0.0 | 1.0
NMU_NMUR2	CPI-SS07B3139A0	simple:P48645	simple:Q9GZQ4	ENSG00000109255	ENSG00000132911	guidetopharmacology.org	TRUE	FALSE	0.0 | 1.0	0.0 | 1.0	0.0 | 1.0	0.003 | 1.0	0.001 | 1.0	0.033 | 1.0	0.017 | 1.0	0.01 | 1.0	0.008 | 1.0	0.039 | 1.0	0.023 | 1.0	0.0 | 1.0	0.0 | 1.0	0.0 | 1.0	0.0 | 1.0	0.0 | 1.0	0.0 | 1.0	0.0 | 1.0	0.003 | 1.0	0.0 | 1.0	0.015 | 1.0	0.003 | 1.0	0.001 | 1.0	0.033 | 1.0	0.017 | 1.0
NMS_NMUR2	CPI-SS0C849D294	simple:Q5H8A3	simple:Q9GZQ4	ENSG00000204640	ENSG00000132911	guidetopharmacology.org	TRUE	FALSE	0.003 | 1.0	0.0 | 1.0	0.014 | 1.0	0.003 | 1.0	0.001 | 1.0	0.033 | 1.0	0.017 | 1.0	0.0 | 1.0	0.0 | 1.0	0.0 | 1.0	0.0 | 1.0	0.004 | 1.0	0.0 | 1.0	0.016 | 1.0	0.004 | 1.0	0.001 | 1.0	0.033 | 1.0	0.017 | 1.0	0.003 | 1.0	0.0 | 1.0	0.015 | 1.0	0.003 | 1.0	0.001 | 1.0	0.033 | 1.0	0.017 | 1.0
ENHO_GPR19	CPI-SS0B281803E	simple:Q6UWT2	simple:Q15760	ENSG00000168913	ENSG00000183150	guidetopharmacology.org	TRUE	FALSE	0.008 | 1.0	0.004 | 1.0	0.008 | 1.0	0.014 | 1.0	0.012 | 1.0	0.016 | 1.0	0.015 | 1.0	0.008 | 1.0	0.005 | 1.0	0.009 | 1.0	0.008 | 1.0	0.0 | 1.0	0.0 | 1.0	0.0 | 1.0	0.019 | 1.0	0.017 | 1.0	0.02 | 1.0	0.019 | 1.0	0.019 | 1.0	0.016 | 1.0	0.02 | 1.0	0.012 | 1.0	0.01 | 1.0	0.013 | 1.0	0.012 | 1.0
RYK_WNT1	CPI-SS0351500AE	simple:P34925	simple:P04628	ENSG00000163785	ENSG00000125084	InnateDB-All	TRUE	FALSE	0.0 | 1.0	0.0 | 1.0	0.032 | 1.0	0.034 | 1.0	0.0 | 1.0	0.0 | 1.0	0.034 | 1.0	0.044 | 1.0	0.0 | 1.0	0.0 | 1.0	0.044 | 1.0	0.0 | 1.0	0.0 | 1.0	0.02 | 1.0	0.031 | 1.0	0.0 | 1.0	0.0 | 1.0	0.031 | 1.0	0.0 | 1.0	0.0 | 1.0	0.037 | 1.0	0.019 | 1.0	0.0 | 1.0	0.0 | 1.0	0.019 | 1.0
KISS1_KISS1R	CPI-SS0F856A80F	simple:Q15726	simple:Q969F8	ENSG00000170498	ENSG00000116014	guidetopharmacology.org	TRUE	FALSE	0.002 | 1.0	0.003 | 1.0	0.002 | 1.0	0.0 | 1.0	0.0 | 1.0	0.0 | 1.0	0.0 | 1.0	0.002 | 1.0	0.0 | 1.0	0.0 | 1.0	0.002 | 1.0	0.0 | 1.0	0.0 | 1.0	0.0 | 1.0	0.004 | 1.0	0.0 | 1.0	0.0 | 1.0	0.003 | 1.0	0.002 | 1.0	0.003 | 1.0	0.002 | 1.0	0.001 | 1.0	0.0 | 1.0	0.0 | 1.0	0.001 | 1.0
NPVF_NPFFR1	CPI-SS0C445451E	simple:Q9HCQ7	simple:Q9GZQ6	ENSG00000105954	ENSG00000148734	guidetopharmacology.org	TRUE	FALSE	0.002 | 1.0	0.0 | 1.0	0.0 | 1.0	0.0 | 1.0	0.0 | 1.0	0.0 | 1.0	0.0 | 1.0	0.001 | 1.0	0.0 | 1.0	0.0 | 1.0	0.001 | 1.0	0.003 | 1.0	0.0 | 1.0	0.0 | 1.0	0.0 | 1.0	0.0 | 1.0	0.0 | 1.0	0.0 | 1.0	0.0 | 1.0	0.0 | 1.0	0.0 | 1.0	0.001 | 1.0	0.0 | 1.0	0.0 | 1.0	0.001 | 1.0
NTS_NTSR1	CPI-SS06C93E09A	simple:P30990	simple:P30989	ENSG00000133636	ENSG00000101188	guidetopharmacology.org	TRUE	FALSE	0.0 | 1.0	0.0 | 1.0	0.0 | 1.0	0.0 | 1.0	0.0 | 1.0	0.0 | 1.0	0.0 | 1.0	0.0 | 1.0	0.0 | 1.0	0.0 | 1.0	0.0 | 1.0	0.0 | 1.0	0.0 | 1.0	0.0 | 1.0	0.0 | 1.0	0.0 | 1.0	0.0 | 1.0	0.0 | 1.0	0.0 | 1.0	0.0 | 1.0	0.0 | 1.0	0.003 | 1.0	0.002 | 1.0	0.002 | 1.0	0.002 | 1.0
HCRT_HCRTR1	CPI-SS084816B12	simple:O43612	simple:O43613	ENSG00000161610	ENSG00000121764	guidetopharmacology.org	TRUE	FALSE	0.0 | 1.0	0.0 | 1.0	0.0 | 1.0	0.003 | 1.0	0.002 | 1.0	0.006 | 1.0	0.0 | 1.0	0.0 | 1.0	0.0 | 1.0	0.0 | 1.0	0.0 | 1.0	0.0 | 1.0	0.0 | 1.0	0.0 | 1.0	0.0 | 1.0	0.0 | 1.0	0.0 | 1.0	0.0 | 1.0	0.0 | 1.0	0.0 | 1.0	0.0 | 1.0	0.0 | 1.0	0.0 | 1.0	0.0 | 1.0	0.0 | 1.0
PPOX_HCRTR1	CPI-SS084816B12	simple:O43612	simple:O43613	ENSG00000143224	ENSG00000121764	guidetopharmacology.org	TRUE	FALSE	0.012 | 1.0	0.0 | 1.0	0.0 | 1.0	0.009 | 1.0	0.009 | 1.0	0.013 | 1.0	0.0 | 1.0	0.03 | 1.0	0.029 | 1.0	0.033 | 1.0	0.0 | 1.0	0.038 | 1.0	0.0 | 1.0	0.0 | 1.0	0.016 | 1.0	0.015 | 1.0	0.019 | 1.0	0.0 | 1.0	0.008 | 1.0	0.0 | 1.0	0.0 | 1.0	0.015 | 1.0	0.014 | 1.0	0.019 | 1.0	0.0 | 1.0
HCRT_HCRTR2	CPI-SS02461AE98	simple:O43612	simple:O43614	ENSG00000161610	ENSG00000137252	guidetopharmacology.org	TRUE	FALSE	0.0 | 1.0	0.0 | 1.0	0.0 | 1.0	0.0 | 1.0	0.003 | 1.0	0.002 | 1.0	0.004 | 1.0	0.0 | 1.0	0.0 | 1.0	0.0 | 1.0	0.0 | 1.0	0.0 | 1.0	0.0 | 1.0	0.0 | 1.0	0.0 | 1.0	0.0 | 1.0	0.0 | 1.0	0.0 | 1.0	0.0 | 1.0	0.0 | 1.0	0.0 | 1.0	0.0 | 1.0	0.0 | 1.0	0.0 | 1.0	0.0 | 1.0
PPOX_HCRTR2	CPI-SS02461AE98	simple:O43612	simple:O43614	ENSG00000143224	ENSG00000137252	guidetopharmacology.org	TRUE	FALSE	0.016 | 1.0	0.013 | 1.0	0.014 | 1.0	0.0 | 1.0	0.009 | 1.0	0.009 | 1.0	0.01 | 1.0	0.0 | 1.0	0.03 | 1.0	0.029 | 1.0	0.03 | 1.0	0.042 | 1.0	0.039 | 1.0	0.039 | 1.0	0.0 | 1.0	0.016 | 1.0	0.015 | 1.0	0.017 | 1.0	0.012 | 1.0	0.009 | 1.0	0.009 | 1.0	0.0 | 1.0	0.015 | 1.0	0.014 | 1.0	0.016 | 1.0
PROK1_PROKR2	CPI-SS04465565A	simple:P58294	simple:Q8NFJ6	ENSG00000143125	ENSG00000101292	guidetopharmacology.org	TRUE	FALSE	0.0 | 1.0	0.0 | 1.0	0.0 | 1.0	0.001 | 1.0	0.0 | 1.0	0.001 | 1.0	0.001 | 1.0	0.002 | 1.0	0.0 | 1.0	0.002 | 1.0	0.002 | 1.0	0.0 | 1.0	0.0 | 1.0	0.0 | 1.0	0.0 | 1.0	0.0 | 1.0	0.0 | 1.0	0.0 | 1.0	0.0 | 1.0	0.0 | 1.0	0.0 | 1.0	0.0 | 1.0	0.0 | 1.0	0.0 | 1.0	0.0 | 1.0
PROK2_PROKR2	CPI-SS0AEED3EB0	simple:Q9HC23	simple:Q8NFJ6	ENSG00000163421	ENSG00000101292	guidetopharmacology.org	TRUE	FALSE	0.0 | 1.0	0.0 | 1.0	0.0 | 1.0	0.0 | 1.0	0.0 | 1.0	0.0 | 1.0	0.0 | 1.0	0.0 | 1.0	0.0 | 1.0	0.0 | 1.0	0.0 | 1.0	0.0 | 1.0	0.0 | 1.0	0.0 | 1.0	0.001 | 1.0	0.0 | 1.0	0.001 | 1.0	0.001 | 1.0	0.0 | 1.0	0.0 | 1.0	0.0 | 1.0	0.0 | 1.0	0.0 | 1.0	0.0 | 1.0	0.0 | 1.0
ADORA2A_NAMPT	CPI-SS00A6D366F	simple:P29274	simple:P43490	ENSG00000128271	ENSG00000105835	MINT	TRUE	FALSE	0.028 | 1.0	0.084 | 1.0	0.028 | 1.0	0.061 | 1.0	0.099 | 1.0	0.053 | 1.0	0.053 | 1.0	0.031 | 1.0	0.068 | 1.0	0.023 | 1.0	0.023 | 1.0	0.021 | 1.0	0.077 | 1.0	0.021 | 1.0	0.034 | 1.0	0.071 | 1.0	0.026 | 1.0	0.026 | 1.0	0.021 | 1.0	0.077 | 1.0	0.021 | 1.0	0.04 | 1.0	0.077 | 1.0	0.032 | 1.0	0.032 | 1.0
CGA_LHCGR	CPI-SS033180726	simple:P01215	simple:P22888	ENSG00000135346	ENSG00000138039	InnateDB-All	TRUE	FALSE	0.0 | 1.0	0.0 | 1.0	0.0 | 1.0	0.0 | 1.0	0.0 | 1.0	0.0 | 1.0	0.0 | 1.0	0.0 | 1.0	0.0 | 1.0	0.0 | 1.0	0.0 | 1.0	0.0 | 1.0	0.0 | 1.0	0.0 | 1.0	0.0 | 1.0	0.0 | 1.0	0.0 | 1.0	0.0 | 1.0	0.0 | 1.0	0.0 | 1.0	0.0 | 1.0	0.002 | 1.0	0.0 | 1.0	0.003 | 1.0	0.001 | 1.0
AVPR1A_VIP	CPI-SS0EAF2DEFE	simple:P37288	simple:P01282	ENSG00000166148	ENSG00000146469	IntAct	TRUE	FALSE	0.0 | 1.0	0.0 | 1.0	0.0 | 1.0	0.001 | 1.0	0.001 | 1.0	0.0 | 1.0	0.0 | 1.0	0.002 | 1.0	0.002 | 1.0	0.0 | 1.0	0.0 | 1.0	0.0 | 1.0	0.0 | 1.0	0.0 | 1.0	0.001 | 1.0	0.001 | 1.0	0.0 | 1.0	0.0 | 1.0	0.0 | 1.0	0.0 | 1.0	0.0 | 1.0	0.002 | 1.0	0.003 | 1.0	0.0 | 1.0	0.0 | 1.0
AVPR1A_AVP	CPI-SS096DC69CB	simple:P37288	simple:P01185	ENSG00000166148	ENSG00000101200	IntAct	TRUE	FALSE	0.077 | 1.0	0.007 | 1.0	0.01 | 1.0	0.001 | 1.0	0.001 | 1.0	0.003 | 1.0	0.003 | 1.0	0.002 | 1.0	0.002 | 1.0	0.004 | 1.0	0.004 | 1.0	0.0 | 1.0	0.0 | 1.0	0.0 | 1.0	0.002 | 1.0	0.001 | 1.0	0.004 | 1.0	0.003 | 1.0	0.081 | 1.0	0.011 | 1.0	0.015 | 1.0	0.003 | 1.0	0.003 | 1.0	0.005 | 1.0	0.004 | 1.0
FSHR_CGA	CPI-SS023041E32	simple:P23945	simple:P01215	ENSG00000170820	ENSG00000135346	InnateDB-All	TRUE	FALSE	0.002 | 1.0	0.0 | 1.0	0.0 | 1.0	0.0 | 1.0	0.0 | 1.0	0.0 | 1.0	0.001 | 1.0	0.0 | 1.0	0.0 | 1.0	0.0 | 1.0	0.001 | 1.0	0.003 | 1.0	0.0 | 1.0	0.0 | 1.0	0.0 | 1.0	0.0 | 1.0	0.0 | 1.0	0.001 | 1.0	0.0 | 1.0	0.0 | 1.0	0.0 | 1.0	0.0 | 1.0	0.0 | 1.0	0.0 | 1.0	0.001 | 1.0
CD274_CD80	CPI-SS0D7DB794A	simple:Q9NZQ7	simple:P33681	ENSG00000120217	ENSG00000121594	curated	FALSE	FALSE	0.011 | 1.0	0.009 | 1.0	0.006 | 1.0	0.002 | 1.0	0.004 | 1.0	0.002 | 1.0	0.002 | 1.0	0.002 | 1.0	0.004 | 1.0	0.002 | 1.0	0.002 | 1.0	0.008 | 1.0	0.006 | 1.0	0.003 | 1.0	0.002 | 1.0	0.004 | 1.0	0.002 | 1.0	0.002 | 1.0	0.01 | 1.0	0.008 | 1.0	0.005 | 1.0	0.004 | 1.0	0.006 | 1.0	0.004 | 1.0	0.004 | 1.0
CD274_PDCD1	CPI-SS09D4B2070	simple:Q9NZQ7	simple:Q15116	ENSG00000120217	ENSG00000188389	curated	FALSE	FALSE	0.0 | 1.0	0.0 | 1.0	0.0 | 1.0	0.001 | 1.0	0.0 | 1.0	0.002 | 1.0	0.0 | 1.0	0.001 | 1.0	0.0 | 1.0	0.002 | 1.0	0.0 | 1.0	0.0 | 1.0	0.0 | 1.0	0.0 | 1.0	0.001 | 1.0	0.0 | 1.0	0.002 | 1.0	0.0 | 1.0	0.0 | 1.0	0.0 | 1.0	0.0 | 1.0	0.003 | 1.0	0.0 | 1.0	0.004 | 1.0	0.0 | 1.0
PDCD1LG2_PDCD1	CPI-SS08DF7B12C	simple:Q9BQ51	simple:Q15116	ENSG00000197646	ENSG00000188389	curated	TRUE	FALSE	0.0 | 1.0	0.0 | 1.0	0.0 | 1.0	0.001 | 1.0	0.0 | 1.0	0.002 | 1.0	0.0 | 1.0	0.0 | 1.0	0.0 | 1.0	0.0 | 1.0	0.0 | 1.0	0.0 | 1.0	0.0 | 1.0	0.0 | 1.0	0.0 | 1.0	0.0 | 1.0	0.0 | 1.0	0.0 | 1.0	0.0 | 1.0	0.0 | 1.0	0.0 | 1.0	0.001 | 1.0	0.0 | 1.0	0.002 | 1.0	0.0 | 1.0
LEP_LEPR	CPI-SS066FE05CA	simple:P41159	simple:P48357	ENSG00000174697	ENSG00000116678	curated	TRUE	FALSE	0.159 | 1.0	0.229 | 1.0	0.123 | 1.0	0.133 | 1.0	0.209 | 1.0	0.114 | 1.0	0.135 | 1.0	0.134 | 1.0	0.209 | 1.0	0.114 | 1.0	0.136 | 1.0	0.154 | 1.0	0.224 | 1.0	0.119 | 1.0	0.133 | 1.0	0.208 | 1.0	0.113 | 1.0	0.135 | 1.0	0.156 | 1.0	0.226 | 1.0	0.121 | 1.0	0.133 | 1.0	0.209 | 1.0	0.114 | 1.0	0.136 | 1.0
BST2_LILRA4	CPI-SS0D3064F3D	simple:Q10589	simple:P59901	ENSG00000130303	ENSG00000239961	curated	FALSE	FALSE	0.022 | 1.0	0.023 | 1.0	0.019 | 1.0	0.015 | 1.0	0.015 | 1.0	0.013 | 1.0	0.012 | 1.0	0.047 | 1.0	0.047 | 1.0	0.045 | 1.0	0.044 | 1.0	0.026 | 1.0	0.027 | 1.0	0.024 | 1.0	0.025 | 1.0	0.025 | 1.0	0.023 | 1.0	0.021 | 1.0	0.01 | 1.0	0.01 | 1.0	0.007 | 1.0	0.017 | 1.0	0.016 | 1.0	0.015 | 1.0	0.013 | 1.0
ICOS_ICOSLG	CPI-SS0DEC5095E	simple:Q9Y6W8	simple:O75144	ENSG00000163600	ENSG00000160223	curated	TRUE	FALSE	0.002 | 1.0	0.004 | 1.0	0.0 | 1.0	0.005 | 1.0	0.003 | 1.0	0.0 | 1.0	0.003 | 1.0	0.006 | 1.0	0.005 | 1.0	0.0 | 1.0	0.004 | 1.0	0.0 | 1.0	0.0 | 1.0	0.0 | 1.0	0.005 | 1.0	0.004 | 1.0	0.0 | 1.0	0.003 | 1.0	0.002 | 1.0	0.003 | 1.0	0.0 | 1.0	0.004 | 1.0	0.003 | 1.0	0.0 | 1.0	0.003 | 1.0
CADM1_CRTAM	CPI-SS0DECC850D	simple:Q9BY67	simple:O95727	ENSG00000182985	ENSG00000109943	curated	FALSE	FALSE	0.009 | 1.0	0.0 | 1.0	0.0 | 1.0	0.011 | 1.0	0.011 | 1.0	0.011 | 1.0	0.0 | 1.0	0.07 | 1.0	0.07 | 1.0	0.07 | 1.0	0.0 | 1.0	0.04 | 1.0	0.0 | 1.0	0.0 | 1.0	0.027 | 1.0	0.027 | 1.0	0.027 | 1.0	0.0 | 1.0	0.01 | 1.0	0.0 | 1.0	0.0 | 1.0	0.008 | 1.0	0.008 | 1.0	0.008 | 1.0	0.0 | 1.0
NPR1_NPPC	CPI-SS0A1864A37	simple:P16066	simple:P23582	ENSG00000169418	ENSG00000163273	InnateDB-All	TRUE	FALSE	0.01 | 1.0	0.042 | 1.0	0.016 | 1.0	0.132 | 1.0	0.036 | 1.0	0.024 | 1.0	0.213 | 1.0	0.128 | 1.0	0.032 | 1.0	0.02 | 1.0	0.209 | 1.0	0.007 | 1.0	0.039 | 1.0	0.014 | 1.0	0.143 | 1.0	0.047 | 1.0	0.035 | 1.0	0.224 | 1.0	0.015 | 1.0	0.047 | 1.0	0.021 | 1.0	0.135 | 1.0	0.039 | 1.0	0.027 | 1.0	0.216 | 1.0
TNFSF9_TNFRSF9	CPI-SS0431D2256	simple:P41273	simple:Q07011	ENSG00000125657	ENSG00000049249	curated	TRUE	FALSE	0.005 | 1.0	0.0 | 1.0	0.009 | 1.0	0.005 | 1.0	0.006 | 1.0	0.01 | 1.0	0.004 | 1.0	0.004 | 1.0	0.005 | 1.0	0.009 | 1.0	0.003 | 1.0	0.007 | 1.0	0.0 | 1.0	0.011 | 1.0	0.004 | 1.0	0.005 | 1.0	0.009 | 1.0	0.003 | 1.0	0.007 | 1.0	0.0 | 1.0	0.011 | 1.0	0.004 | 1.0	0.006 | 1.0	0.009 | 1.0	0.003 | 1.0
CD47_SIRPG	CPI-SS0E9015902	simple:Q08722	simple:Q9P1W8	ENSG00000196776	ENSG00000089012	curated	FALSE	FALSE	0.037 | 1.0	0.0 | 1.0	0.0 | 1.0	0.051 | 1.0	0.052 | 1.0	0.0 | 1.0	0.051 | 1.0	0.099 | 1.0	0.1 | 1.0	0.0 | 1.0	0.099 | 1.0	0.17 | 1.0	0.0 | 1.0	0.0 | 1.0	0.06 | 1.0	0.061 | 1.0	0.0 | 1.0	0.06 | 1.0	0.041 | 1.0	0.0 | 1.0	0.0 | 1.0	0.051 | 1.0	0.052 | 1.0	0.0 | 1.0	0.051 | 1.0
ACVR2B_INHBE	CPI-SS0E28FD773	simple:Q13705	simple:P58166	ENSG00000114739	ENSG00000139269	curated	TRUE	FALSE	0.006 | 1.0	0.011 | 1.0	0.006 | 1.0	0.002 | 1.0	0.002 | 1.0	0.002 | 1.0	0.001 | 1.0	0.013 | 1.0	0.014 | 1.0	0.013 | 1.0	0.013 | 1.0	0.005 | 1.0	0.01 | 1.0	0.005 | 1.0	0.002 | 1.0	0.002 | 1.0	0.001 | 1.0	0.001 | 1.0	0.0 | 1.0	0.0 | 1.0	0.0 | 1.0	0.002 | 1.0	0.002 | 1.0	0.001 | 1.0	0.001 | 1.0
ACVR2A_INHBE	CPI-SS099C401F7	simple:P27037	simple:P58166	ENSG00000121989	ENSG00000139269	curated	TRUE	FALSE	0.008 | 1.0	0.013 | 1.0	0.008 | 1.0	0.009 | 1.0	0.009 | 1.0	0.009 | 1.0	0.008 | 1.0	0.023 | 1.0	0.024 | 1.0	0.023 | 1.0	0.022 | 1.0	0.018 | 1.0	0.023 | 1.0	0.018 | 1.0	0.007 | 1.0	0.008 | 1.0	0.007 | 1.0	0.007 | 1.0	0.005 | 1.0	0.01 | 1.0	0.005 | 1.0	0.004 | 1.0	0.005 | 1.0	0.004 | 1.0	0.004 | 1.0
ACVR2B_INHBC	CPI-SS0E80E17ED	simple:Q13705	simple:P55103	ENSG00000114739	ENSG00000175189	curated	TRUE	FALSE	0.005 | 1.0	0.007 | 1.0	0.006 | 1.0	0.003 | 1.0	0.003 | 1.0	0.003 | 1.0	0.002 | 1.0	0.015 | 1.0	0.014 | 1.0	0.014 | 1.0	0.013 | 1.0	0.005 | 1.0	0.006 | 1.0	0.005 | 1.0	0.003 | 1.0	0.003 | 1.0	0.003 | 1.0	0.002 | 1.0	0.0 | 1.0	0.0 | 1.0	0.0 | 1.0	0.003 | 1.0	0.003 | 1.0	0.003 | 1.0	0.002 | 1.0
ACVR2A_INHBC	CPI-SS0D53B88CC	simple:P27037	simple:P55103	ENSG00000121989	ENSG00000175189	curated	TRUE	FALSE	0.007 | 1.0	0.009 | 1.0	0.008 | 1.0	0.01 | 1.0	0.01 | 1.0	0.01 | 1.0	0.009 | 1.0	0.024 | 1.0	0.024 | 1.0	0.024 | 1.0	0.023 | 1.0	0.017 | 1.0	0.019 | 1.0	0.018 | 1.0	0.009 | 1.0	0.009 | 1.0	0.009 | 1.0	0.008 | 1.0	0.005 | 1.0	0.006 | 1.0	0.005 | 1.0	0.006 | 1.0	0.006 | 1.0	0.006 | 1.0	0.005 | 1.0
TNFSF8_TNFRSF8	CPI-SS084306E19	simple:P32971	simple:P28908	ENSG00000106952	ENSG00000120949	curated	FALSE	FALSE	0.004 | 1.0	0.005 | 1.0	0.0 | 1.0	0.002 | 1.0	0.002 | 1.0	0.0 | 1.0	0.002 | 1.0	0.003 | 1.0	0.003 | 1.0	0.0 | 1.0	0.004 | 1.0	0.003 | 1.0	0.004 | 1.0	0.0 | 1.0	0.002 | 1.0	0.001 | 1.0	0.0 | 1.0	0.002 | 1.0	0.002 | 1.0	0.003 | 1.0	0.0 | 1.0	0.002 | 1.0	0.002 | 1.0	0.0 | 1.0	0.003 | 1.0
THPO_MPL	CPI-SS0DC2DD9D7	simple:P40225	simple:P40238	ENSG00000090534	ENSG00000117400	curated	TRUE	FALSE	0.003 | 1.0	0.0 | 1.0	0.0 | 1.0	0.0 | 1.0	0.0 | 1.0	0.0 | 1.0	0.0 | 1.0	0.001 | 1.0	0.002 | 1.0	0.0 | 1.0	0.001 | 1.0	0.003 | 1.0	0.0 | 1.0	0.0 | 1.0	0.002 | 1.0	0.003 | 1.0	0.0 | 1.0	0.002 | 1.0	0.002 | 1.0	0.0 | 1.0	0.0 | 1.0	0.001 | 1.0	0.002 | 1.0	0.0 | 1.0	0.001 | 1.0
TNFSF18_TNFRSF18	CPI-SS0FF51A757	simple:Q9UNG2	simple:Q9Y5U5	ENSG00000120337	ENSG00000186891	curated	TRUE	FALSE	0.0 | 1.0	0.0 | 1.0	0.0 | 1.0	0.001 | 1.0	0.001 | 1.0	0.0 | 1.0	0.001 | 1.0	0.001 | 1.0	0.002 | 1.0	0.0 | 1.0	0.002 | 1.0	0.0 | 1.0	0.0 | 1.0	0.0 | 1.0	0.0 | 1.0	0.0 | 1.0	0.0 | 1.0	0.0 | 1.0	0.0 | 1.0	0.0 | 1.0	0.0 | 1.0	0.002 | 1.0	0.002 | 1.0	0.0 | 1.0	0.002 | 1.0
MARCO_SCGB3A1	CPI-SS08ADB9826	simple:Q9UEW3	simple:Q96QR1	ENSG00000019169	ENSG00000161055	InnateDB-All	TRUE	FALSE	0.0 | 1.0	0.0 | 1.0	0.0 | 1.0	0.0 | 1.0	0.0 | 1.0	0.0 | 1.0	0.0 | 1.0	0.002 | 1.0	0.002 | 1.0	0.002 | 1.0	0.002 | 1.0	0.004 | 1.0	0.0 | 1.0	0.0 | 1.0	0.0 | 1.0	0.0 | 1.0	0.0 | 1.0	0.0 | 1.0	0.0 | 1.0	0.0 | 1.0	0.0 | 1.0	0.002 | 1.0	0.002 | 1.0	0.002 | 1.0	0.002 | 1.0
KLRB1_CLEC2D	CPI-SS0E292C126	simple:Q12918	simple:Q9UHP7	ENSG00000111796	ENSG00000069493	curated	FALSE	FALSE	0.012 | 1.0	0.023 | 1.0	0.012 | 1.0	0.007 | 1.0	0.01 | 1.0	0.011 | 1.0	0.008 | 1.0	0.01 | 1.0	0.012 | 1.0	0.013 | 1.0	0.01 | 1.0	0.01 | 1.0	0.021 | 1.0	0.009 | 1.0	0.009 | 1.0	0.012 | 1.0	0.013 | 1.0	0.01 | 1.0	0.015 | 1.0	0.026 | 1.0	0.015 | 1.0	0.006 | 1.0	0.009 | 1.0	0.01 | 1.0	0.007 | 1.0
KLRC2_HLAE_HUMAN	CPI-SS0FA147015	simple:P26717	simple:P13747	ENSG00000205809	ENSG00000204592	curated	FALSE	FALSE	0.048 | 1.0	0.254 | 1.0	0.052 | 1.0	0.049 | 1.0	0.347 | 1.0	0.055 | 1.0	0.042 | 1.0	0.05 | 1.0	0.347 | 1.0	0.055 | 1.0	0.042 | 1.0	0.049 | 1.0	0.255 | 1.0	0.053 | 1.0	0.049 | 1.0	0.346 | 1.0	0.055 | 1.0	0.041 | 1.0	0.047 | 1.0	0.253 | 1.0	0.051 | 1.0	0.05 | 1.0	0.347 | 1.0	0.055 | 1.0	0.042 | 1.0
ANGPT1_TEK	CPI-SS0DE9B07A8	simple:Q15389	simple:Q02763	ENSG00000154188	ENSG00000120156	curated	TRUE	FALSE	0.004 | 1.0	0.005 | 1.0	0.017 | 1.0	0.005 | 1.0	0.03 | 1.0	0.008 | 1.0	0.006 | 1.0	0.0 | 1.0	0.0 | 1.0	0.0 | 1.0	0.0 | 1.0	0.0 | 1.0	0.0 | 1.0	0.0 | 1.0	0.0 | 1.0	0.0 | 1.0	0.0 | 1.0	0.0 | 1.0	0.005 | 1.0	0.005 | 1.0	0.018 | 1.0	0.004 | 1.0	0.03 | 1.0	0.008 | 1.0	0.005 | 1.0
ANGPT2_TEK	CPI-SS0BAB460FF	simple:O15123	simple:Q02763	ENSG00000091879	ENSG00000120156	curated	TRUE	FALSE	0.012 | 1.0	0.013 | 1.0	0.025 | 1.0	0.021 | 1.0	0.046 | 1.0	0.024 | 1.0	0.022 | 1.0	0.0 | 1.0	0.0 | 1.0	0.0 | 1.0	0.0 | 1.0	0.012 | 1.0	0.012 | 1.0	0.025 | 1.0	0.025 | 1.0	0.05 | 1.0	0.029 | 1.0	0.026 | 1.0	0.017 | 1.0	0.018 | 1.0	0.03 | 1.0	0.01 | 1.0	0.035 | 1.0	0.014 | 1.0	0.011 | 1.0
ANGPT4_TEK	CPI-SS0D89F86A7	simple:Q9Y264	simple:Q02763	ENSG00000101280	ENSG00000120156	curated	TRUE	FALSE	0.076 | 1.0	0.076 | 1.0	0.089 | 1.0	0.004 | 1.0	0.029 | 1.0	0.008 | 1.0	0.005 | 1.0	0.007 | 1.0	0.032 | 1.0	0.01 | 1.0	0.008 | 1.0	0.006 | 1.0	0.006 | 1.0	0.019 | 1.0	0.013 | 1.0	0.038 | 1.0	0.016 | 1.0	0.014 | 1.0	0.012 | 1.0	0.013 | 1.0	0.025 | 1.0	0.007 | 1.0	0.032 | 1.0	0.01 | 1.0	0.008 | 1.0
LEFTY1_TDGF1	CPI-SS0E9F84F1F	simple:O75610	simple:P13385	ENSG00000243709	ENSG00000241186	curated	TRUE	FALSE	0.002 | 1.0	0.0 | 1.0	0.0 | 1.0	0.0 | 1.0	0.0 | 1.0	0.0 | 1.0	0.0 | 1.0	0.0 | 1.0	0.0 | 1.0	0.0 | 1.0	0.002 | 1.0	0.021 | 1.0	0.0 | 1.0	0.0 | 1.0	0.0 | 1.0	0.0 | 1.0	0.0 | 1.0	0.0 | 1.0	0.002 | 1.0	0.0 | 1.0	0.0 | 1.0	0.0 | 1.0	0.0 | 1.0	0.0 | 1.0	0.002 | 1.0
LEFTY2_TDGF1	CPI-SS033A27302	simple:O00292	simple:P13385	ENSG00000143768	ENSG00000241186	curated	TRUE	FALSE	0.002 | 1.0	0.0 | 1.0	0.0 | 1.0	0.0 | 1.0	0.0 | 1.0	0.0 | 1.0	0.0 | 1.0	0.0 | 1.0	0.0 | 1.0	0.0 | 1.0	0.002 | 1.0	0.021 | 1.0	0.0 | 1.0	0.0 | 1.0	0.0 | 1.0	0.0 | 1.0	0.0 | 1.0	0.0 | 1.0	0.002 | 1.0	0.0 | 1.0	0.0 | 1.0	0.0 | 1.0	0.0 | 1.0	0.0 | 1.0	0.002 | 1.0
CD52_SIGLEC10	CPI-SS073C1B796	simple:P31358	simple:Q96LC7	ENSG00000169442	ENSG00000142512	curated	TRUE	FALSE	0.009 | 1.0	0.0 | 1.0	0.0 | 1.0	0.0 | 1.0	0.0 | 1.0	0.0 | 1.0	0.0 | 1.0	0.002 | 1.0	0.0 | 1.0	0.001 | 1.0	0.001 | 1.0	0.0 | 1.0	0.0 | 1.0	0.0 | 1.0	0.0 | 1.0	0.0 | 1.0	0.0 | 1.0	0.0 | 1.0	0.004 | 1.0	0.0 | 1.0	0.0 | 1.0	0.002 | 1.0	0.0 | 1.0	0.001 | 1.0	0.001 | 1.0
CX3CL1_CX3CR1	CPI-SS0388C9C86	simple:P78423	simple:P49238	ENSG00000006210	ENSG00000168329	curated	TRUE	FALSE	0.006 | 1.0	0.0 | 1.0	0.0 | 1.0	0.0 | 1.0	0.009 | 1.0	0.0 | 1.0	0.0 | 1.0	0.0 | 1.0	0.156 | 1.0	0.0 | 1.0	0.0 | 1.0	0.146 | 1.0	0.0 | 1.0	0.0 | 1.0	0.0 | 1.0	0.008 | 1.0	0.0 | 1.0	0.0 | 1.0	0.0 | 1.0	0.0 | 1.0	0.0 | 1.0	0.0 | 1.0	0.008 | 1.0	0.0 | 1.0	0.0 | 1.0
TNFSF4_TNFRSF4	CPI-SS04456F441	simple:P23510	simple:P43489	ENSG00000117586	ENSG00000186827	curated	FALSE	FALSE	0.002 | 1.0	0.0 | 1.0	0.003 | 1.0	0.0 | 1.0	0.0 | 1.0	0.0 | 1.0	0.0 | 1.0	0.002 | 1.0	0.0 | 1.0	0.001 | 1.0	0.002 | 1.0	0.003 | 1.0	0.0 | 1.0	0.003 | 1.0	0.0 | 1.0	0.0 | 1.0	0.0 | 1.0	0.0 | 1.0	0.002 | 1.0	0.0 | 1.0	0.002 | 1.0	0.002 | 1.0	0.0 | 1.0	0.001 | 1.0	0.002 | 1.0
XCL1_XCR1	CPI-SS07EF9679E	simple:P47992	simple:P46094	ENSG00000143184	ENSG00000173578	curated	TRUE	FALSE	0.01 | 1.0	0.006 | 1.0	0.007 | 1.0	0.0 | 1.0	0.0 | 1.0	0.0 | 1.0	0.0 | 1.0	0.0 | 1.0	0.0 | 1.0	0.0 | 1.0	0.0 | 1.0	0.0 | 1.0	0.0 | 1.0	0.0 | 1.0	0.009 | 1.0	0.01 | 1.0	0.007 | 1.0	0.008 | 1.0	0.009 | 1.0	0.005 | 1.0	0.006 | 1.0	0.0 | 1.0	0.0 | 1.0	0.0 | 1.0	0.0 | 1.0
XCL2_XCR1	CPI-SS0E29693E6	simple:Q9UBD3	simple:P46094	ENSG00000143185	ENSG00000173578	curated	TRUE	FALSE	0.01 | 1.0	0.006 | 1.0	0.007 | 1.0	0.0 | 1.0	0.0 | 1.0	0.0 | 1.0	0.0 | 1.0	0.0 | 1.0	0.0 | 1.0	0.0 | 1.0	0.0 | 1.0	0.0 | 1.0	0.0 | 1.0	0.0 | 1.0	0.009 | 1.0	0.01 | 1.0	0.007 | 1.0	0.008 | 1.0	0.009 | 1.0	0.005 | 1.0	0.006 | 1.0	0.0 | 1.0	0.0 | 1.0	0.0 | 1.0	0.0 | 1.0
CD200_CD200R1	CPI-SS0A9E884E0	simple:P41217	simple:Q8TD46	ENSG00000091972	ENSG00000163606	curated	TRUE	FALSE	0.018 | 1.0	0.015 | 1.0	0.026 | 1.0	0.025 | 1.0	0.027 | 1.0	0.031 | 1.0	0.026 | 1.0	0.107 | 1.0	0.108 | 1.0	0.113 | 1.0	0.108 | 1.0	0.028 | 1.0	0.025 | 1.0	0.035 | 1.0	0.01 | 1.0	0.012 | 1.0	0.016 | 1.0	0.011 | 1.0	0.013 | 1.0	0.01 | 1.0	0.021 | 1.0	0.013 | 1.0	0.014 | 1.0	0.019 | 1.0	0.014 | 1.0
aEb7 complex_CDH1	CPI-CS0E623E651	complex:aEb7 complex	simple:P12830		ENSG00000039068	curated	FALSE	TRUE	0.018 | 1.0	1.148 | 1.0	0.019 | 1.0	0.033 | 1.0	1.146 | 1.0	0.02 | 1.0	0.021 | 1.0	0.0 | 1.0	0.0 | 1.0	0.0 | 1.0	0.0 | 1.0	0.0 | 1.0	0.0 | 1.0	0.0 | 1.0	0.031 | 1.0	1.144 | 1.0	0.018 | 1.0	0.019 | 1.0	0.0 | 1.0	0.0 | 1.0	0.0 | 1.0	0.029 | 1.0	1.143 | 1.0	0.016 | 1.0	0.018 | 1.0
aVb1 complex_FN1	CPI-CS0AF9D1B32	complex:aVb1 complex	simple:P02751		ENSG00000115414	curated	TRUE	TRUE	2.524 | 1.0	0.242 | 1.0	1.875 | 1.0	3.385 | 1.0	0.296 | 1.0	2.169 | 1.0	1.334 | 1.0	0.0 | 1.0	0.0 | 1.0	0.0 | 1.0	0.0 | 1.0	2.525 | 1.0	0.243 | 1.0	1.876 | 1.0	3.383 | 1.0	0.294 | 1.0	2.167 | 1.0	1.332 | 1.0	2.524 | 1.0	0.242 | 1.0	1.875 | 1.0	3.383 | 1.0	0.293 | 1.0	2.167 | 1.0	1.332 | 1.0
a4b7 complex_FN1	CPI-CS09E2A4C75	complex:a4b7 complex	simple:P02751		ENSG00000115414	curated	TRUE	TRUE	2.527 | 1.0	0.245 | 1.0	1.878 | 1.0	3.383 | 1.0	0.293 | 1.0	2.167 | 1.0	1.332 | 1.0	3.382 | 1.0	0.292 | 1.0	2.166 | 1.0	1.331 | 1.0	0.0 | 1.0	0.0 | 1.0	0.0 | 1.0	3.383 | 1.0	0.293 | 1.0	2.166 | 1.0	1.332 | 1.0	2.524 | 1.0	0.242 | 1.0	1.875 | 1.0	3.383 | 1.0	0.293 | 1.0	2.167 | 1.0	1.332 | 1.0
a2b1 complex_FN1	CPI-CS0E12590CC	complex:a2b1 complex	simple:P02751		ENSG00000115414	curated	TRUE	TRUE	2.525 | 1.0	0.243 | 1.0	1.876 | 1.0	3.383 | 1.0	0.293 | 1.0	2.166 | 1.0	1.332 | 1.0	3.383 | 1.0	0.293 | 1.0	2.167 | 1.0	1.332 | 1.0	2.529 | 1.0	0.247 | 1.0	1.88 | 1.0	3.382 | 1.0	0.292 | 1.0	2.166 | 1.0	1.331 | 1.0	0.0 | 1.0	0.0 | 1.0	0.0 | 1.0	3.382 | 1.0	0.292 | 1.0	2.165 | 1.0	1.331 | 1.0
a3b1 complex_FN1	CPI-CS011E677AC	complex:a3b1 complex	simple:P02751		ENSG00000115414	curated	TRUE	TRUE	2.525 | 1.0	0.243 | 1.0	1.876 | 1.0	3.386 | 1.0	0.296 | 1.0	2.17 | 1.0	1.335 | 1.0	3.442 | 0.0	0.352 | 1.0	2.226 | 0.0	1.391 | 1.0	2.585 | 1.0	0.303 | 1.0	1.936 | 1.0	3.387 | 1.0	0.297 | 1.0	2.171 | 1.0	1.336 | 1.0	0.0 | 1.0	0.0 | 1.0	0.0 | 1.0	3.383 | 1.0	0.294 | 1.0	2.167 | 1.0	1.332 | 1.0
a4b1 complex_FN1	CPI-CS06CA1EF36	complex:a4b1 complex	simple:P02751		ENSG00000115414	curated	TRUE	TRUE	2.527 | 1.0	0.245 | 1.0	1.878 | 1.0	3.383 | 1.0	0.293 | 1.0	2.167 | 1.0	1.332 | 1.0	3.382 | 1.0	0.292 | 1.0	2.166 | 1.0	1.331 | 1.0	0.0 | 1.0	0.0 | 1.0	0.0 | 1.0	3.383 | 1.0	0.293 | 1.0	2.166 | 1.0	1.332 | 1.0	2.524 | 1.0	0.242 | 1.0	1.875 | 1.0	3.383 | 1.0	0.293 | 1.0	2.167 | 1.0	1.332 | 1.0
a8b1 complex_FN1	CPI-CS0FF4E9E1E	complex:a8b1 complex	simple:P02751		ENSG00000115414	curated	TRUE	TRUE	2.612 | 0.0	0.33 | 1.0	1.963 | 0.441	3.408 | 1.0	0.319 | 1.0	2.192 | 1.0	1.357 | 1.0	3.387 | 1.0	0.298 | 1.0	2.171 | 1.0	1.336 | 1.0	2.531 | 1.0	0.249 | 1.0	1.882 | 1.0	3.467 | 0.0	0.378 | 1.0	2.251 | 0.0	1.416 | 1.0	2.571 | 1.0	0.289 | 1.0	1.922 | 1.0	3.398 | 1.0	0.308 | 1.0	2.181 | 1.0	1.347 | 1.0
a10b1 complex_FN1	CPI-CS0C58D4424	complex:a10b1 complex	simple:P02751		ENSG00000115414	curated	TRUE	TRUE	2.528 | 1.0	0.246 | 1.0	1.879 | 1.0	3.384 | 1.0	0.295 | 1.0	2.168 | 1.0	1.333 | 1.0	3.385 | 1.0	0.295 | 1.0	2.169 | 1.0	1.334 | 1.0	2.527 | 1.0	0.245 | 1.0	1.878 | 1.0	3.389 | 1.0	0.299 | 1.0	2.173 | 1.0	1.338 | 1.0	2.525 | 1.0	0.243 | 1.0	1.876 | 1.0	3.383 | 1.0	0.293 | 1.0	2.167 | 1.0	1.332 | 1.0
a11b1 complex_FN1	CPI-CS094D5D014	complex:a11b1 complex	simple:P02751		ENSG00000115414	curated	TRUE	TRUE	2.524 | 1.0	0.242 | 1.0	1.875 | 1.0	3.383 | 1.0	0.293 | 1.0	2.166 | 1.0	1.332 | 1.0	3.383 | 1.0	0.294 | 1.0	2.167 | 1.0	1.332 | 1.0	2.535 | 1.0	0.253 | 1.0	1.886 | 1.0	3.386 | 1.0	0.296 | 1.0	2.17 | 1.0	1.335 | 1.0	2.535 | 1.0	0.253 | 1.0	1.886 | 1.0	3.383 | 1.0	0.293 | 1.0	2.167 | 1.0	1.332 | 1.0
a5b1 complex_FN1	CPI-CS03DA9B97D	complex:a5b1 complex	simple:P02751		ENSG00000115414	curated	TRUE	TRUE	2.547 | 1.0	0.265 | 1.0	1.898 | 1.0	3.403 | 1.0	0.313 | 1.0	2.187 | 1.0	1.352 | 1.0	3.384 | 1.0	0.295 | 1.0	2.168 | 1.0	1.333 | 1.0	2.533 | 1.0	0.251 | 1.0	1.884 | 1.0	3.405 | 1.0	0.315 | 1.0	2.189 | 1.0	1.354 | 1.0	2.547 | 1.0	0.265 | 1.0	1.898 | 1.0	3.395 | 1.0	0.305 | 1.0	2.178 | 1.0	1.343 | 1.0
aVb1 complex_VTN	CPI-CS0FF7211BE	complex:aVb1 complex	simple:P04004		ENSG00000109072	curated	TRUE	TRUE	0.004 | 1.0	0.0 | 1.0	0.006 | 1.0	0.009 | 1.0	0.007 | 1.0	0.005 | 1.0	0.006 | 1.0	0.0 | 1.0	0.0 | 1.0	0.0 | 1.0	0.0 | 1.0	0.004 | 1.0	0.0 | 1.0	0.006 | 1.0	0.007 | 1.0	0.005 | 1.0	0.003 | 1.0	0.004 | 1.0	0.003 | 1.0	0.0 | 1.0	0.005 | 1.0	0.007 | 1.0	0.005 | 1.0	0.003 | 1.0	0.004 | 1.0
a2b1 complex_LAMC1	CPI-CS0A7E59889	complex:a2b1 complex	simple:P11047		ENSG00000135862	curated	TRUE	TRUE	0.023 | 1.0	0.013 | 1.0	0.025 | 1.0	0.018 | 1.0	0.012 | 1.0	0.024 | 1.0	0.016 | 1.0	0.018 | 1.0	0.012 | 1.0	0.024 | 1.0	0.016 | 1.0	0.027 | 1.0	0.017 | 1.0	0.029 | 1.0	0.017 | 1.0	0.011 | 1.0	0.024 | 1.0	0.015 | 1.0	0.0 | 1.0	0.0 | 1.0	0.0 | 1.0	0.017 | 1.0	0.011 | 1.0	0.023 | 1.0	0.015 | 1.0
a6b1 complex_LAMC1	CPI-CS00A10621C	complex:a6b1 complex	simple:P11047		ENSG00000135862	curated	TRUE	TRUE	0.094 | 1.0	0.084 | 1.0	0.096 | 1.0	0.093 | 1.0	0.088 | 1.0	0.1 | 1.0	0.091 | 1.0	0.159 | 1.0	0.154 | 1.0	0.166 | 1.0	0.158 | 1.0	0.081 | 1.0	0.071 | 1.0	0.083 | 1.0	0.07 | 1.0	0.064 | 1.0	0.077 | 1.0	0.068 | 1.0	0.044 | 1.0	0.033 | 1.0	0.046 | 1.0	0.041 | 1.0	0.036 | 1.0	0.048 | 1.0	0.04 | 1.0
a7b1 complex_LAMC1	CPI-CS0C6332E2B	complex:a7b1 complex	simple:P11047		ENSG00000135862	curated	TRUE	TRUE	0.038 | 1.0	0.027 | 1.0	0.04 | 1.0	0.026 | 1.0	0.02 | 1.0	0.032 | 1.0	0.024 | 1.0	0.026 | 1.0	0.021 | 1.0	0.033 | 1.0	0.024 | 1.0	0.087 | 1.0	0.077 | 1.0	0.089 | 1.0	0.027 | 1.0	0.021 | 1.0	0.034 | 1.0	0.025 | 1.0	0.043 | 1.0	0.032 | 1.0	0.045 | 1.0	0.023 | 1.0	0.017 | 1.0	0.029 | 1.0	0.021 | 1.0
a4b1 complex_SPP1	CPI-CS0E11E1C0A	complex:a4b1 complex	simple:P10451		ENSG00000118785	curated	TRUE	TRUE	0.005 | 1.0	0.04 | 1.0	0.0 | 1.0	0.004 | 1.0	0.009 | 1.0	0.003 | 1.0	0.004 | 1.0	0.003 | 1.0	0.008 | 1.0	0.002 | 1.0	0.003 | 1.0	0.0 | 1.0	0.0 | 1.0	0.0 | 1.0	0.003 | 1.0	0.008 | 1.0	0.003 | 1.0	0.003 | 1.0	0.002 | 1.0	0.036 | 1.0	0.0 | 1.0	0.003 | 1.0	0.008 | 1.0	0.003 | 1.0	0.003 | 1.0
a9b1 complex_SPP1	CPI-CS0B7B96ABE	complex:a9b1 complex	simple:P10451		ENSG00000118785	curated	TRUE	TRUE	0.003 | 1.0	0.037 | 1.0	0.0 | 1.0	0.004 | 1.0	0.009 | 1.0	0.004 | 1.0	0.004 | 1.0	0.003 | 1.0	0.008 | 1.0	0.002 | 1.0	0.003 | 1.0	0.003 | 1.0	0.037 | 1.0	0.0 | 1.0	0.003 | 1.0	0.008 | 1.0	0.002 | 1.0	0.003 | 1.0	0.002 | 1.0	0.036 | 1.0	0.0 | 1.0	0.003 | 1.0	0.008 | 1.0	0.002 | 1.0	0.003 | 1.0
a3b1 complex_THBS1	CPI-CS01A52F76F	complex:a3b1 complex	simple:P07996		ENSG00000137801	curated	FALSE	TRUE	0.007 | 1.0	0.035 | 1.0	0.009 | 1.0	0.008 | 1.0	0.005 | 1.0	0.008 | 1.0	0.007 | 1.0	0.064 | 1.0	0.062 | 1.0	0.064 | 1.0	0.063 | 1.0	0.067 | 1.0	0.095 | 1.0	0.07 | 1.0	0.009 | 1.0	0.006 | 1.0	0.009 | 1.0	0.008 | 1.0	0.0 | 1.0	0.0 | 1.0	0.0 | 1.0	0.006 | 1.0	0.003 | 1.0	0.006 | 1.0	0.005 | 1.0
a4b1 complex_TNC	CPI-CS06223CD7E	complex:a4b1 complex	simple:P24821		ENSG00000041982	curated	TRUE	TRUE	0.117 | 1.0	0.065 | 1.0	0.691 | 1.0	0.134 | 1.0	0.035 | 1.0	0.561 | 1.0	0.189 | 1.0	0.133 | 1.0	0.033 | 1.0	0.56 | 1.0	0.188 | 1.0	0.0 | 1.0	0.0 | 1.0	0.0 | 1.0	0.134 | 1.0	0.034 | 1.0	0.561 | 1.0	0.188 | 1.0	0.114 | 1.0	0.061 | 1.0	0.688 | 1.0	0.134 | 1.0	0.034 | 1.0	0.561 | 1.0	0.188 | 1.0
a8b1 complex_TNC	CPI-CS0CC30FCA5	complex:a8b1 complex	simple:P24821		ENSG00000041982	curated	TRUE	TRUE	0.203 | 1.0	0.15 | 1.0	0.777 | 0.0	0.159 | 1.0	0.06 | 1.0	0.587 | 1.0	0.214 | 1.0	0.138 | 1.0	0.039 | 1.0	0.566 | 1.0	0.193 | 1.0	0.121 | 1.0	0.068 | 1.0	0.695 | 1.0	0.218 | 1.0	0.119 | 1.0	0.646 | 0.0	0.273 | 0.485	0.161 | 1.0	0.108 | 1.0	0.735 | 1.0	0.149 | 1.0	0.049 | 1.0	0.576 | 1.0	0.203 | 1.0
a9b1 complex_TNC	CPI-CS01A06F36D	complex:a9b1 complex	simple:P24821		ENSG00000041982	curated	TRUE	TRUE	0.115 | 1.0	0.062 | 1.0	0.689 | 1.0	0.135 | 1.0	0.035 | 1.0	0.562 | 1.0	0.189 | 1.0	0.133 | 1.0	0.033 | 1.0	0.56 | 1.0	0.188 | 1.0	0.115 | 1.0	0.062 | 1.0	0.689 | 1.0	0.133 | 1.0	0.033 | 1.0	0.56 | 1.0	0.188 | 1.0	0.114 | 1.0	0.061 | 1.0	0.688 | 1.0	0.133 | 1.0	0.033 | 1.0	0.56 | 1.0	0.188 | 1.0
aVb6 complex_TNC	CPI-CS0C900CDF8	complex:aVb6 complex	simple:P24821		ENSG00000041982	curated	TRUE	TRUE	0.115 | 1.0	0.062 | 1.0	0.688 | 1.0	0.137 | 1.0	0.037 | 1.0	0.564 | 1.0	0.191 | 1.0	0.0 | 1.0	0.0 | 1.0	0.0 | 1.0	0.0 | 1.0	0.115 | 1.0	0.062 | 1.0	0.689 | 1.0	0.134 | 1.0	0.035 | 1.0	0.562 | 1.0	0.189 | 1.0	0.114 | 1.0	0.061 | 1.0	0.688 | 1.0	0.134 | 1.0	0.035 | 1.0	0.561 | 1.0	0.189 | 1.0
a4b7 complex_VCAM1	CPI-CS00438820D	complex:a4b7 complex	simple:P19320		ENSG00000162692	curated	FALSE	TRUE	0.012 | 1.0	0.071 | 1.0	0.081 | 1.0	0.007 | 1.0	0.031 | 1.0	0.069 | 1.0	0.003 | 1.0	0.006 | 1.0	0.03 | 1.0	0.068 | 1.0	0.002 | 1.0	0.0 | 1.0	0.0 | 1.0	0.0 | 1.0	0.007 | 1.0	0.03 | 1.0	0.069 | 1.0	0.003 | 1.0	0.009 | 1.0	0.067 | 1.0	0.077 | 1.0	0.007 | 1.0	0.03 | 1.0	0.069 | 1.0	0.003 | 1.0
a9b1 complex_VCAM1	CPI-CS0C432D807	complex:a9b1 complex	simple:P19320		ENSG00000162692	curated	FALSE	TRUE	0.01 | 1.0	0.069 | 1.0	0.078 | 1.0	0.008 | 1.0	0.031 | 1.0	0.07 | 1.0	0.003 | 1.0	0.006 | 1.0	0.03 | 1.0	0.068 | 1.0	0.002 | 1.0	0.01 | 1.0	0.068 | 1.0	0.078 | 1.0	0.006 | 1.0	0.03 | 1.0	0.068 | 1.0	0.002 | 1.0	0.009 | 1.0	0.067 | 1.0	0.077 | 1.0	0.006 | 1.0	0.03 | 1.0	0.068 | 1.0	0.002 | 1.0
a4b7 complex_MADCAM1	CPI-CS01C107980	complex:a4b7 complex	simple:Q13477		ENSG00000099866	curated	FALSE	TRUE	0.005 | 1.0	0.0 | 1.0	0.005 | 1.0	0.0 | 1.0	0.003 | 1.0	0.005 | 1.0	0.003 | 1.0	0.0 | 1.0	0.002 | 1.0	0.004 | 1.0	0.002 | 1.0	0.0 | 1.0	0.0 | 1.0	0.0 | 1.0	0.0 | 1.0	0.003 | 1.0	0.005 | 1.0	0.003 | 1.0	0.002 | 1.0	0.0 | 1.0	0.002 | 1.0	0.0 | 1.0	0.003 | 1.0	0.005 | 1.0	0.003 | 1.0
a2b1 complex_COL1A1	CPI-CS06B7139A7	complex:a2b1 complex	simple:P02452		ENSG00000108821	curated	TRUE	TRUE	4.968 | 1.0	0.703 | 1.0	21.81 | 1.0	4.913 | 1.0	0.794 | 1.0	15.677 | 1.0	5.858 | 1.0	4.913 | 1.0	0.795 | 1.0	15.677 | 1.0	5.858 | 1.0	4.973 | 1.0	0.707 | 1.0	21.814 | 1.0	4.913 | 1.0	0.794 | 1.0	15.676 | 1.0	5.857 | 1.0	0.0 | 1.0	0.0 | 1.0	0.0 | 1.0	4.912 | 1.0	0.793 | 1.0	15.676 | 1.0	5.857 | 1.0
a10b1 complex_COL1A1	CPI-CS0D753BC92	complex:a10b1 complex	simple:P02452		ENSG00000108821	curated	TRUE	TRUE	4.972 | 1.0	0.707 | 1.0	21.813 | 1.0	4.915 | 1.0	0.796 | 1.0	15.679 | 1.0	5.86 | 1.0	4.916 | 1.0	0.797 | 1.0	15.68 | 1.0	5.86 | 1.0	4.97 | 1.0	0.705 | 1.0	21.812 | 1.0	4.92 | 1.0	0.801 | 1.0	15.684 | 1.0	5.864 | 1.0	4.968 | 1.0	0.703 | 1.0	21.81 | 1.0	4.913 | 1.0	0.795 | 1.0	15.677 | 1.0	5.858 | 1.0
a11b1 complex_COL1A1	CPI-CS080C39903	complex:a11b1 complex	simple:P02452		ENSG00000108821	curated	TRUE	TRUE	4.968 | 1.0	0.703 | 1.0	21.81 | 1.0	4.913 | 1.0	0.794 | 1.0	15.677 | 1.0	5.858 | 1.0	4.914 | 1.0	0.795 | 1.0	15.678 | 1.0	5.859 | 1.0	4.979 | 1.0	0.714 | 1.0	21.82 | 1.0	4.917 | 1.0	0.798 | 1.0	15.681 | 1.0	5.861 | 1.0	4.979 | 1.0	0.714 | 1.0	21.82 | 1.0	4.914 | 1.0	0.795 | 1.0	15.678 | 1.0	5.858 | 1.0
a1b1 complex_COL1A1	CPI-CS0A520E71F	complex:a1b1 complex	simple:P02452		ENSG00000108821	curated	TRUE	TRUE	5.017 | 1.0	0.752 | 1.0	21.858 | 1.0	4.914 | 1.0	0.795 | 1.0	15.678 | 1.0	5.859 | 1.0	4.913 | 1.0	0.794 | 1.0	15.677 | 1.0	5.857 | 1.0	4.97 | 1.0	0.705 | 1.0	21.812 | 1.0	4.928 | 1.0	0.809 | 1.0	15.692 | 1.0	5.873 | 1.0	4.981 | 1.0	0.716 | 1.0	21.823 | 1.0	4.917 | 1.0	0.798 | 1.0	15.681 | 1.0	5.861 | 1.0
a2b1 complex_COL4A1	CPI-CS0028629A4	complex:a2b1 complex	simple:P02462		ENSG00000187498	curated	TRUE	TRUE	0.37 | 1.0	0.075 | 1.0	0.374 | 1.0	0.674 | 1.0	0.164 | 1.0	0.403 | 1.0	0.266 | 1.0	0.674 | 1.0	0.164 | 1.0	0.403 | 1.0	0.266 | 1.0	0.374 | 1.0	0.079 | 1.0	0.378 | 1.0	0.673 | 1.0	0.164 | 1.0	0.402 | 1.0	0.265 | 1.0	0.0 | 1.0	0.0 | 1.0	0.0 | 1.0	0.673 | 1.0	0.163 | 1.0	0.402 | 1.0	0.265 | 1.0
a10b1 complex_COL4A1	CPI-CS0DFC31AD1	complex:a10b1 complex	simple:P02462		ENSG00000187498	curated	TRUE	TRUE	0.373 | 1.0	0.078 | 1.0	0.377 | 1.0	0.676 | 1.0	0.166 | 1.0	0.405 | 1.0	0.268 | 1.0	0.676 | 1.0	0.167 | 1.0	0.406 | 1.0	0.268 | 1.0	0.372 | 1.0	0.077 | 1.0	0.376 | 1.0	0.68 | 1.0	0.171 | 1.0	0.41 | 1.0	0.272 | 1.0	0.37 | 1.0	0.075 | 1.0	0.374 | 1.0	0.674 | 1.0	0.164 | 1.0	0.403 | 1.0	0.266 | 1.0
a11b1 complex_COL4A1	CPI-CS0CDE2E432	complex:a11b1 complex	simple:P02462		ENSG00000187498	curated	TRUE	TRUE	0.37 | 1.0	0.074 | 1.0	0.373 | 1.0	0.674 | 1.0	0.164 | 1.0	0.403 | 1.0	0.266 | 1.0	0.675 | 1.0	0.165 | 1.0	0.404 | 1.0	0.267 | 1.0	0.38 | 1.0	0.085 | 1.0	0.384 | 1.0	0.677 | 1.0	0.168 | 1.0	0.407 | 1.0	0.269 | 1.0	0.38 | 1.0	0.085 | 1.0	0.384 | 1.0	0.674 | 1.0	0.165 | 1.0	0.404 | 1.0	0.266 | 1.0
a1b1 complex_COL4A1	CPI-CS07746F377	complex:a1b1 complex	simple:P02462		ENSG00000187498	curated	TRUE	TRUE	0.418 | 1.0	0.123 | 1.0	0.422 | 1.0	0.675 | 1.0	0.165 | 1.0	0.404 | 1.0	0.267 | 1.0	0.673 | 1.0	0.164 | 1.0	0.402 | 1.0	0.265 | 1.0	0.372 | 1.0	0.077 | 1.0	0.376 | 1.0	0.689 | 1.0	0.179 | 1.0	0.418 | 1.0	0.281 | 1.0	0.383 | 1.0	0.087 | 1.0	0.386 | 1.0	0.677 | 1.0	0.168 | 1.0	0.407 | 1.0	0.269 | 1.0
a2b1 complex_COL4A2	CPI-CS09534636D	complex:a2b1 complex	simple:P08572		ENSG00000134871	curated	TRUE	TRUE	0.003 | 1.0	0.0 | 1.0	0.004 | 1.0	0.003 | 1.0	0.003 | 1.0	0.006 | 1.0	0.004 | 1.0	0.003 | 1.0	0.003 | 1.0	0.006 | 1.0	0.004 | 1.0	0.007 | 1.0	0.0 | 1.0	0.008 | 1.0	0.002 | 1.0	0.002 | 1.0	0.005 | 1.0	0.003 | 1.0	0.0 | 1.0	0.0 | 1.0	0.0 | 1.0	0.002 | 1.0	0.002 | 1.0	0.005 | 1.0	0.003 | 1.0
a10b1 complex_COL4A2	CPI-CS099096063	complex:a10b1 complex	simple:P08572		ENSG00000134871	curated	TRUE	TRUE	0.006 | 1.0	0.0 | 1.0	0.008 | 1.0	0.005 | 1.0	0.005 | 1.0	0.008 | 1.0	0.006 | 1.0	0.005 | 1.0	0.005 | 1.0	0.008 | 1.0	0.006 | 1.0	0.005 | 1.0	0.0 | 1.0	0.006 | 1.0	0.009 | 1.0	0.009 | 1.0	0.012 | 1.0	0.011 | 1.0	0.003 | 1.0	0.0 | 1.0	0.004 | 1.0	0.003 | 1.0	0.003 | 1.0	0.006 | 1.0	0.004 | 1.0
a11b1 complex_COL4A2	CPI-CS08BC1D0A5	complex:a11b1 complex	simple:P08572		ENSG00000134871	curated	TRUE	TRUE	0.002 | 1.0	0.0 | 1.0	0.004 | 1.0	0.003 | 1.0	0.003 | 1.0	0.006 | 1.0	0.004 | 1.0	0.004 | 1.0	0.004 | 1.0	0.007 | 1.0	0.005 | 1.0	0.013 | 1.0	0.0 | 1.0	0.015 | 1.0	0.006 | 1.0	0.007 | 1.0	0.009 | 1.0	0.008 | 1.0	0.013 | 1.0	0.0 | 1.0	0.015 | 1.0	0.003 | 1.0	0.003 | 1.0	0.006 | 1.0	0.005 | 1.0
a1b1 complex_COL4A2	CPI-CS07428ADC3	complex:a1b1 complex	simple:P08572		ENSG00000134871	curated	TRUE	TRUE	0.051 | 1.0	0.0 | 1.0	0.053 | 1.0	0.004 | 1.0	0.004 | 1.0	0.007 | 1.0	0.005 | 1.0	0.002 | 1.0	0.002 | 1.0	0.005 | 1.0	0.003 | 1.0	0.005 | 1.0	0.0 | 1.0	0.006 | 1.0	0.018 | 1.0	0.018 | 1.0	0.021 | 1.0	0.019 | 1.0	0.015 | 1.0	0.0 | 1.0	0.017 | 1.0	0.006 | 1.0	0.006 | 1.0	0.009 | 1.0	0.008 | 1.0
a2b1 complex_COL14A1	CPI-CS034DE5D82	complex:a2b1 complex	simple:Q05707		ENSG00000187955	curated	TRUE	TRUE	0.011 | 1.0	0.0 | 1.0	0.029 | 1.0	0.002 | 1.0	0.008 | 1.0	0.032 | 1.0	0.008 | 1.0	0.002 | 1.0	0.008 | 1.0	0.032 | 1.0	0.008 | 1.0	0.015 | 1.0	0.0 | 1.0	0.033 | 1.0	0.002 | 1.0	0.008 | 1.0	0.031 | 1.0	0.008 | 1.0	0.0 | 1.0	0.0 | 1.0	0.0 | 1.0	0.001 | 1.0	0.007 | 1.0	0.031 | 1.0	0.007 | 1.0
a10b1 complex_COL14A1	CPI-CS06B536403	complex:a10b1 complex	simple:Q05707		ENSG00000187955	curated	TRUE	TRUE	0.015 | 1.0	0.0 | 1.0	0.033 | 1.0	0.004 | 1.0	0.01 | 1.0	0.033 | 1.0	0.01 | 1.0	0.005 | 1.0	0.011 | 1.0	0.034 | 1.0	0.011 | 1.0	0.013 | 1.0	0.0 | 1.0	0.031 | 1.0	0.009 | 1.0	0.015 | 1.0	0.038 | 1.0	0.015 | 1.0	0.011 | 1.0	0.0 | 1.0	0.029 | 1.0	0.002 | 1.0	0.008 | 1.0	0.032 | 1.0	0.008 | 1.0
a11b1 complex_COL14A1	CPI-CS0CAF8C9A6	complex:a11b1 complex	simple:Q05707		ENSG00000187955	curated	TRUE	TRUE	0.011 | 1.0	0.0 | 1.0	0.029 | 1.0	0.002 | 1.0	0.008 | 1.0	0.032 | 1.0	0.008 | 1.0	0.003 | 1.0	0.009 | 1.0	0.032 | 1.0	0.009 | 1.0	0.022 | 1.0	0.0 | 1.0	0.04 | 1.0	0.006 | 1.0	0.012 | 1.0	0.035 | 1.0	0.012 | 1.0	0.022 | 1.0	0.0 | 1.0	0.04 | 1.0	0.003 | 1.0	0.009 | 1.0	0.032 | 1.0	0.009 | 1.0
a1b1 complex_COL14A1	CPI-CS08D151D0D	complex:a1b1 complex	simple:Q05707		ENSG00000187955	curated	TRUE	TRUE	0.06 | 1.0	0.0 | 1.0	0.078 | 1.0	0.003 | 1.0	0.009 | 1.0	0.032 | 1.0	0.009 | 1.0	0.002 | 1.0	0.008 | 1.0	0.031 | 1.0	0.008 | 1.0	0.013 | 1.0	0.0 | 1.0	0.031 | 1.0	0.017 | 1.0	0.023 | 1.0	0.047 | 1.0	0.023 | 1.0	0.024 | 1.0	0.0 | 1.0	0.042 | 1.0	0.006 | 1.0	0.012 | 1.0	0.035 | 1.0	0.012 | 1.0
a2b1 complex_COL4A6	CPI-CS01AAAA04A	complex:a2b1 complex	simple:Q14031		ENSG00000197565	curated	TRUE	TRUE	0.007 | 1.0	0.0 | 1.0	0.003 | 1.0	0.005 | 1.0	0.002 | 1.0	0.002 | 1.0	0.004 | 1.0	0.005 | 1.0	0.002 | 1.0	0.002 | 1.0	0.005 | 1.0	0.011 | 1.0	0.0 | 1.0	0.007 | 1.0	0.004 | 1.0	0.001 | 1.0	0.001 | 1.0	0.004 | 1.0	0.0 | 1.0	0.0 | 1.0	0.0 | 1.0	0.004 | 1.0	0.001 | 1.0	0.001 | 1.0	0.003 | 1.0
a10b1 complex_COL4A6	CPI-CS03BD8F598	complex:a10b1 complex	simple:Q14031		ENSG00000197565	curated	TRUE	TRUE	0.01 | 1.0	0.0 | 1.0	0.006 | 1.0	0.007 | 1.0	0.004 | 1.0	0.004 | 1.0	0.006 | 1.0	0.008 | 1.0	0.005 | 1.0	0.005 | 1.0	0.007 | 1.0	0.009 | 1.0	0.0 | 1.0	0.005 | 1.0	0.012 | 1.0	0.009 | 1.0	0.009 | 1.0	0.011 | 1.0	0.007 | 1.0	0.0 | 1.0	0.003 | 1.0	0.005 | 1.0	0.002 | 1.0	0.002 | 1.0	0.005 | 1.0
a11b1 complex_COL4A6	CPI-CS0078E9262	complex:a11b1 complex	simple:Q14031		ENSG00000197565	curated	TRUE	TRUE	0.007 | 1.0	0.0 | 1.0	0.003 | 1.0	0.005 | 1.0	0.002 | 1.0	0.002 | 1.0	0.004 | 1.0	0.006 | 1.0	0.003 | 1.0	0.003 | 1.0	0.005 | 1.0	0.017 | 1.0	0.0 | 1.0	0.013 | 1.0	0.009 | 1.0	0.006 | 1.0	0.006 | 1.0	0.008 | 1.0	0.017 | 1.0	0.0 | 1.0	0.014 | 1.0	0.006 | 1.0	0.003 | 1.0	0.003 | 1.0	0.005 | 1.0
a1b1 complex_COL4A6	CPI-CS013047EEE	complex:a1b1 complex	simple:Q14031		ENSG00000197565	curated	TRUE	TRUE	0.055 | 1.0	0.0 | 1.0	0.052 | 1.0	0.006 | 1.0	0.003 | 1.0	0.003 | 1.0	0.005 | 1.0	0.004 | 1.0	0.002 | 1.0	0.001 | 1.0	0.004 | 1.0	0.009 | 1.0	0.0 | 1.0	0.005 | 1.0	0.02 | 1.0	0.017 | 1.0	0.017 | 1.0	0.02 | 1.0	0.02 | 1.0	0.0 | 1.0	0.016 | 1.0	0.009 | 1.0	0.006 | 1.0	0.006 | 1.0	0.008 | 1.0
a2b1 complex_COL8A1	CPI-CS0F25E6DB5	complex:a2b1 complex	simple:P27658		ENSG00000144810	curated	TRUE	TRUE	0.02 | 1.0	0.006 | 1.0	0.011 | 1.0	0.005 | 1.0	0.011 | 1.0	0.004 | 1.0	0.004 | 1.0	0.005 | 1.0	0.011 | 1.0	0.004 | 1.0	0.004 | 1.0	0.024 | 1.0	0.01 | 1.0	0.015 | 1.0	0.004 | 1.0	0.01 | 1.0	0.004 | 1.0	0.003 | 1.0	0.0 | 1.0	0.0 | 1.0	0.0 | 1.0	0.004 | 1.0	0.01 | 1.0	0.003 | 1.0	0.003 | 1.0
a10b1 complex_COL8A1	CPI-CS08D14CA7D	complex:a10b1 complex	simple:P27658		ENSG00000144810	curated	TRUE	TRUE	0.023 | 1.0	0.01 | 1.0	0.014 | 1.0	0.007 | 1.0	0.012 | 1.0	0.006 | 1.0	0.006 | 1.0	0.008 | 1.0	0.013 | 1.0	0.007 | 1.0	0.006 | 1.0	0.022 | 1.0	0.008 | 1.0	0.013 | 1.0	0.012 | 1.0	0.017 | 1.0	0.011 | 1.0	0.011 | 1.0	0.019 | 1.0	0.006 | 1.0	0.01 | 1.0	0.005 | 1.0	0.011 | 1.0	0.004 | 1.0	0.004 | 1.0
a11b1 complex_COL8A1	CPI-CS0217BD42B	complex:a11b1 complex	simple:P27658		ENSG00000144810	curated	TRUE	TRUE	0.019 | 1.0	0.006 | 1.0	0.01 | 1.0	0.005 | 1.0	0.011 | 1.0	0.004 | 1.0	0.004 | 1.0	0.006 | 1.0	0.011 | 1.0	0.005 | 1.0	0.005 | 1.0	0.03 | 1.0	0.017 | 1.0	0.021 | 1.0	0.009 | 1.0	0.014 | 1.0	0.008 | 1.0	0.008 | 1.0	0.03 | 1.0	0.017 | 1.0	0.021 | 1.0	0.006 | 1.0	0.011 | 1.0	0.005 | 1.0	0.005 | 1.0
a1b1 complex_COL8A1	CPI-CS00C10F40F	complex:a1b1 complex	simple:P27658		ENSG00000144810	curated	TRUE	TRUE	0.068 | 1.0	0.055 | 1.0	0.059 | 1.0	0.006 | 1.0	0.011 | 1.0	0.005 | 1.0	0.005 | 1.0	0.004 | 1.0	0.01 | 1.0	0.004 | 1.0	0.003 | 1.0	0.022 | 1.0	0.008 | 1.0	0.013 | 1.0	0.02 | 1.0	0.026 | 1.0	0.019 | 1.0	0.019 | 1.0	0.032 | 1.0	0.019 | 1.0	0.023 | 1.0	0.009 | 1.0	0.014 | 1.0	0.008 | 1.0	0.008 | 1.0
a2b1 complex_COL3A1	CPI-CS01103AAE5	complex:a2b1 complex	simple:P02461		ENSG00000168542	curated	TRUE	TRUE	8.809 | 1.0	0.741 | 1.0	27.115 | 1.0	6.249 | 1.0	0.777 | 1.0	16.405 | 1.0	7.21 | 1.0	6.249 | 1.0	0.777 | 1.0	16.405 | 1.0	7.21 | 1.0	8.813 | 1.0	0.745 | 1.0	27.119 | 1.0	6.248 | 1.0	0.776 | 1.0	16.405 | 1.0	7.209 | 1.0	0.0 | 1.0	0.0 | 1.0	0.0 | 1.0	6.248 | 1.0	0.776 | 1.0	16.404 | 1.0	7.209 | 1.0
a10b1 complex_COL3A1	CPI-CS04E1F457A	complex:a10b1 complex	simple:P02461		ENSG00000168542	curated	TRUE	TRUE	8.812 | 1.0	0.744 | 1.0	27.118 | 1.0	6.251 | 1.0	0.779 | 1.0	16.407 | 1.0	7.212 | 1.0	6.251 | 1.0	0.779 | 1.0	16.408 | 1.0	7.212 | 1.0	8.811 | 1.0	0.743 | 1.0	27.117 | 1.0	6.255 | 1.0	0.783 | 1.0	16.412 | 1.0	7.216 | 1.0	8.809 | 1.0	0.741 | 1.0	27.115 | 1.0	6.249 | 1.0	0.777 | 1.0	16.405 | 1.0	7.21 | 1.0
a11b1 complex_COL3A1	CPI-CS0EDEB5ED3	complex:a11b1 complex	simple:P02461		ENSG00000168542	curated	TRUE	TRUE	8.808 | 1.0	0.74 | 1.0	27.114 | 1.0	6.249 | 1.0	0.777 | 1.0	16.405 | 1.0	7.21 | 1.0	6.25 | 1.0	0.778 | 1.0	16.406 | 1.0	7.211 | 1.0	8.819 | 1.0	0.751 | 1.0	27.125 | 1.0	6.252 | 1.0	0.781 | 1.0	16.409 | 1.0	7.213 | 1.0	8.819 | 1.0	0.751 | 1.0	27.125 | 1.0	6.249 | 1.0	0.777 | 1.0	16.406 | 1.0	7.21 | 1.0
a1b1 complex_COL3A1	CPI-CS069BED494	complex:a1b1 complex	simple:P02461		ENSG00000168542	curated	TRUE	TRUE	8.857 | 1.0	0.789 | 1.0	27.163 | 1.0	6.25 | 1.0	0.778 | 1.0	16.406 | 1.0	7.211 | 1.0	6.248 | 1.0	0.776 | 1.0	16.405 | 1.0	7.209 | 1.0	8.811 | 1.0	0.743 | 1.0	27.117 | 1.0	6.264 | 1.0	0.792 | 1.0	16.42 | 1.0	7.225 | 1.0	8.821 | 1.0	0.753 | 1.0	27.127 | 1.0	6.252 | 1.0	0.78 | 1.0	16.409 | 1.0	7.213 | 1.0
a2b1 complex_COL5A1	CPI-CS07D654EE6	complex:a2b1 complex	simple:P20908		ENSG00000130635	curated	TRUE	TRUE	0.058 | 1.0	0.01 | 1.0	0.277 | 1.0	0.067 | 1.0	0.013 | 1.0	0.164 | 1.0	0.088 | 1.0	0.067 | 1.0	0.013 | 1.0	0.164 | 1.0	0.088 | 1.0	0.062 | 1.0	0.015 | 1.0	0.281 | 1.0	0.066 | 1.0	0.012 | 1.0	0.163 | 1.0	0.087 | 1.0	0.0 | 1.0	0.0 | 1.0	0.0 | 1.0	0.066 | 1.0	0.012 | 1.0	0.163 | 1.0	0.087 | 1.0
a10b1 complex_COL5A1	CPI-CS0FE4E40D1	complex:a10b1 complex	simple:P20908		ENSG00000130635	curated	TRUE	TRUE	0.061 | 1.0	0.014 | 1.0	0.28 | 1.0	0.069 | 1.0	0.015 | 1.0	0.165 | 1.0	0.09 | 1.0	0.07 | 1.0	0.015 | 1.0	0.166 | 1.0	0.09 | 1.0	0.06 | 1.0	0.012 | 1.0	0.279 | 1.0	0.074 | 1.0	0.019 | 1.0	0.17 | 1.0	0.094 | 1.0	0.058 | 1.0	0.01 | 1.0	0.277 | 1.0	0.067 | 1.0	0.013 | 1.0	0.164 | 1.0	0.088 | 1.0
a11b1 complex_COL5A1	CPI-CS0B0136049	complex:a11b1 complex	simple:P20908		ENSG00000130635	curated	TRUE	TRUE	0.058 | 1.0	0.01 | 1.0	0.276 | 1.0	0.067 | 1.0	0.013 | 1.0	0.164 | 1.0	0.088 | 1.0	0.068 | 1.0	0.014 | 1.0	0.164 | 1.0	0.089 | 1.0	0.068 | 1.0	0.021 | 1.0	0.287 | 1.0	0.071 | 1.0	0.016 | 1.0	0.167 | 1.0	0.091 | 1.0	0.069 | 1.0	0.021 | 1.0	0.287 | 1.0	0.068 | 1.0	0.013 | 1.0	0.164 | 1.0	0.088 | 1.0
a1b1 complex_COL5A1	CPI-CS0814877A1	complex:a1b1 complex	simple:P20908		ENSG00000130635	curated	TRUE	TRUE	0.107 | 1.0	0.059 | 1.0	0.325 | 1.0	0.068 | 1.0	0.014 | 1.0	0.164 | 1.0	0.089 | 1.0	0.066 | 1.0	0.012 | 1.0	0.163 | 1.0	0.087 | 1.0	0.06 | 1.0	0.012 | 1.0	0.279 | 1.0	0.082 | 1.0	0.028 | 1.0	0.179 | 1.0	0.103 | 1.0	0.071 | 1.0	0.023 | 1.0	0.289 | 1.0	0.071 | 1.0	0.016 | 1.0	0.167 | 1.0	0.091 | 1.0
a2b1 complex_COL2A1	CPI-CS005B85FC8	complex:a2b1 complex	simple:P02458		ENSG00000139219	curated	TRUE	TRUE	0.003 | 1.0	0.008 | 1.0	0.0 | 1.0	0.003 | 1.0	0.004 | 1.0	0.0 | 1.0	0.0 | 1.0	0.003 | 1.0	0.005 | 1.0	0.0 | 1.0	0.0 | 1.0	0.007 | 1.0	0.012 | 1.0	0.0 | 1.0	0.002 | 1.0	0.004 | 1.0	0.0 | 1.0	0.0 | 1.0	0.0 | 1.0	0.0 | 1.0	0.0 | 1.0	0.002 | 1.0	0.003 | 1.0	0.0 | 1.0	0.0 | 1.0
a10b1 complex_COL2A1	CPI-CS0BD5B906C	complex:a10b1 complex	simple:P02458		ENSG00000139219	curated	TRUE	TRUE	0.007 | 1.0	0.012 | 1.0	0.0 | 1.0	0.005 | 1.0	0.006 | 1.0	0.0 | 1.0	0.0 | 1.0	0.005 | 1.0	0.007 | 1.0	0.0 | 1.0	0.0 | 1.0	0.005 | 1.0	0.01 | 1.0	0.0 | 1.0	0.009 | 1.0	0.011 | 1.0	0.0 | 1.0	0.0 | 1.0	0.003 | 1.0	0.008 | 1.0	0.0 | 1.0	0.003 | 1.0	0.005 | 1.0	0.0 | 1.0	0.0 | 1.0
a11b1 complex_COL2A1	CPI-CS0596BED25	complex:a11b1 complex	simple:P02458		ENSG00000139219	curated	TRUE	TRUE	0.003 | 1.0	0.008 | 1.0	0.0 | 1.0	0.003 | 1.0	0.004 | 1.0	0.0 | 1.0	0.0 | 1.0	0.004 | 1.0	0.005 | 1.0	0.0 | 1.0	0.0 | 1.0	0.014 | 1.0	0.019 | 1.0	0.0 | 1.0	0.006 | 1.0	0.008 | 1.0	0.0 | 1.0	0.0 | 1.0	0.014 | 1.0	0.019 | 1.0	0.0 | 1.0	0.003 | 1.0	0.005 | 1.0	0.0 | 1.0	0.0 | 1.0
a1b1 complex_COL2A1	CPI-CS0A025FD93	complex:a1b1 complex	simple:P02458		ENSG00000139219	curated	TRUE	TRUE	0.052 | 1.0	0.057 | 1.0	0.0 | 1.0	0.004 | 1.0	0.005 | 1.0	0.0 | 1.0	0.0 | 1.0	0.002 | 1.0	0.004 | 1.0	0.0 | 1.0	0.0 | 1.0	0.005 | 1.0	0.01 | 1.0	0.0 | 1.0	0.018 | 1.0	0.02 | 1.0	0.0 | 1.0	0.0 | 1.0	0.016 | 1.0	0.021 | 1.0	0.0 | 1.0	0.006 | 1.0	0.008 | 1.0	0.0 | 1.0	0.0 | 1.0
a2b1 complex_COL17A1	CPI-CS0C806041C	complex:a2b1 complex	simple:Q9UMD9		ENSG00000065618	curated	TRUE	TRUE	0.004 | 1.0	0.021 | 1.0	0.004 | 1.0	0.002 | 1.0	0.002 | 1.0	0.004 | 1.0	0.002 | 1.0	0.002 | 1.0	0.002 | 1.0	0.004 | 1.0	0.002 | 1.0	0.008 | 1.0	0.025 | 1.0	0.008 | 1.0	0.002 | 1.0	0.001 | 1.0	0.003 | 1.0	0.001 | 1.0	0.0 | 1.0	0.0 | 1.0	0.0 | 1.0	0.001 | 1.0	0.001 | 1.0	0.003 | 1.0	0.001 | 1.0
a10b1 complex_COL17A1	CPI-CS0E7E52E21	complex:a10b1 complex	simple:Q9UMD9		ENSG00000065618	curated	TRUE	TRUE	0.008 | 1.0	0.024 | 1.0	0.008 | 1.0	0.004 | 1.0	0.004 | 1.0	0.005 | 1.0	0.004 | 1.0	0.005 | 1.0	0.005 | 1.0	0.006 | 1.0	0.004 | 1.0	0.006 | 1.0	0.023 | 1.0	0.006 | 1.0	0.009 | 1.0	0.009 | 1.0	0.01 | 1.0	0.008 | 1.0	0.004 | 1.0	0.021 | 1.0	0.004 | 1.0	0.002 | 1.0	0.002 | 1.0	0.004 | 1.0	0.002 | 1.0
a11b1 complex_COL17A1	CPI-CS0CB8C52C7	complex:a11b1 complex	simple:Q9UMD9		ENSG00000065618	curated	TRUE	TRUE	0.004 | 1.0	0.02 | 1.0	0.004 | 1.0	0.002 | 1.0	0.002 | 1.0	0.004 | 1.0	0.002 | 1.0	0.003 | 1.0	0.003 | 1.0	0.004 | 1.0	0.003 | 1.0	0.015 | 1.0	0.031 | 1.0	0.015 | 1.0	0.006 | 1.0	0.006 | 1.0	0.007 | 1.0	0.005 | 1.0	0.015 | 1.0	0.031 | 1.0	0.015 | 1.0	0.003 | 1.0	0.003 | 1.0	0.004 | 1.0	0.002 | 1.0
a1b1 complex_COL17A1	CPI-CS0AD1B2230	complex:a1b1 complex	simple:Q9UMD9		ENSG00000065618	curated	TRUE	TRUE	0.053 | 1.0	0.069 | 1.0	0.053 | 1.0	0.003 | 1.0	0.003 | 1.0	0.004 | 1.0	0.003 | 1.0	0.002 | 1.0	0.002 | 1.0	0.003 | 1.0	0.001 | 1.0	0.006 | 1.0	0.023 | 1.0	0.006 | 1.0	0.017 | 1.0	0.017 | 1.0	0.019 | 1.0	0.017 | 1.0	0.017 | 1.0	0.033 | 1.0	0.017 | 1.0	0.006 | 1.0	0.006 | 1.0	0.007 | 1.0	0.005 | 1.0
a2b1 complex_COL9A2	CPI-CS0375CED88	complex:a2b1 complex	simple:Q14055		ENSG00000049089	curated	TRUE	TRUE	0.022 | 1.0	0.027 | 1.0	0.023 | 1.0	0.015 | 1.0	0.021 | 1.0	0.021 | 1.0	0.011 | 1.0	0.016 | 1.0	0.021 | 1.0	0.022 | 1.0	0.011 | 1.0	0.026 | 1.0	0.031 | 1.0	0.027 | 1.0	0.015 | 1.0	0.021 | 1.0	0.021 | 1.0	0.01 | 1.0	0.0 | 1.0	0.0 | 1.0	0.0 | 1.0	0.014 | 1.0	0.02 | 1.0	0.02 | 1.0	0.01 | 1.0
a10b1 complex_COL9A2	CPI-CS0246973F7	complex:a10b1 complex	simple:Q14055		ENSG00000049089	curated	TRUE	TRUE	0.026 | 1.0	0.03 | 1.0	0.026 | 1.0	0.017 | 1.0	0.023 | 1.0	0.023 | 1.0	0.013 | 1.0	0.018 | 1.0	0.024 | 1.0	0.024 | 1.0	0.013 | 1.0	0.024 | 1.0	0.029 | 1.0	0.025 | 1.0	0.022 | 1.0	0.028 | 1.0	0.028 | 1.0	0.017 | 1.0	0.022 | 1.0	0.027 | 1.0	0.023 | 1.0	0.016 | 1.0	0.021 | 1.0	0.022 | 1.0	0.011 | 1.0
a11b1 complex_COL9A2	CPI-CS0973DED56	complex:a11b1 complex	simple:Q14055		ENSG00000049089	curated	TRUE	TRUE	0.022 | 1.0	0.027 | 1.0	0.023 | 1.0	0.015 | 1.0	0.021 | 1.0	0.021 | 1.0	0.011 | 1.0	0.016 | 1.0	0.022 | 1.0	0.022 | 1.0	0.012 | 1.0	0.033 | 1.0	0.037 | 1.0	0.033 | 1.0	0.019 | 1.0	0.025 | 1.0	0.025 | 1.0	0.015 | 1.0	0.033 | 1.0	0.037 | 1.0	0.033 | 1.0	0.016 | 1.0	0.022 | 1.0	0.022 | 1.0	0.011 | 1.0
a1b1 complex_COL9A2	CPI-CS0943A0FEE	complex:a1b1 complex	simple:Q14055		ENSG00000049089	curated	TRUE	TRUE	0.071 | 1.0	0.075 | 1.0	0.071 | 1.0	0.016 | 1.0	0.022 | 1.0	0.022 | 1.0	0.012 | 1.0	0.015 | 1.0	0.021 | 1.0	0.021 | 1.0	0.01 | 1.0	0.024 | 1.0	0.029 | 1.0	0.025 | 1.0	0.03 | 1.0	0.036 | 1.0	0.037 | 1.0	0.026 | 1.0	0.035 | 1.0	0.04 | 1.0	0.035 | 1.0	0.019 | 1.0	0.025 | 1.0	0.025 | 1.0	0.014 | 1.0
a2b1 complex_COL4A5	CPI-CS06AF4685C	complex:a2b1 complex	simple:P29400		ENSG00000188153	curated	TRUE	TRUE	0.279 | 1.0	0.081 | 1.0	0.1 | 1.0	0.587 | 1.0	0.147 | 1.0	0.143 | 1.0	0.578 | 1.0	0.587 | 1.0	0.147 | 1.0	0.143 | 1.0	0.578 | 1.0	0.283 | 1.0	0.085 | 1.0	0.104 | 1.0	0.586 | 1.0	0.146 | 1.0	0.142 | 1.0	0.577 | 1.0	0.0 | 1.0	0.0 | 1.0	0.0 | 1.0	0.586 | 1.0	0.146 | 1.0	0.142 | 1.0	0.577 | 1.0
a10b1 complex_COL4A5	CPI-CS064C0B34E	complex:a10b1 complex	simple:P29400		ENSG00000188153	curated	TRUE	TRUE	0.282 | 1.0	0.084 | 1.0	0.104 | 1.0	0.589 | 1.0	0.149 | 1.0	0.145 | 1.0	0.579 | 1.0	0.589 | 1.0	0.149 | 1.0	0.145 | 1.0	0.58 | 1.0	0.281 | 1.0	0.083 | 1.0	0.102 | 1.0	0.593 | 1.0	0.153 | 1.0	0.149 | 1.0	0.584 | 1.0	0.279 | 1.0	0.081 | 1.0	0.1 | 1.0	0.587 | 1.0	0.147 | 1.0	0.143 | 1.0	0.578 | 1.0
a11b1 complex_COL4A5	CPI-CS03510EBE9	complex:a11b1 complex	simple:P29400		ENSG00000188153	curated	TRUE	TRUE	0.278 | 1.0	0.08 | 1.0	0.1 | 1.0	0.587 | 1.0	0.147 | 1.0	0.143 | 1.0	0.578 | 1.0	0.588 | 1.0	0.148 | 1.0	0.144 | 1.0	0.578 | 1.0	0.289 | 1.0	0.091 | 1.0	0.111 | 1.0	0.59 | 1.0	0.15 | 1.0	0.146 | 1.0	0.581 | 1.0	0.289 | 1.0	0.091 | 1.0	0.111 | 1.0	0.587 | 1.0	0.147 | 1.0	0.143 | 1.0	0.578 | 1.0
a1b1 complex_COL4A5	CPI-CS00F58CC59	complex:a1b1 complex	simple:P29400		ENSG00000188153	curated	TRUE	TRUE	0.327 | 1.0	0.129 | 1.0	0.149 | 1.0	0.588 | 1.0	0.148 | 1.0	0.144 | 1.0	0.578 | 1.0	0.586 | 1.0	0.146 | 1.0	0.142 | 1.0	0.577 | 1.0	0.281 | 1.0	0.083 | 1.0	0.102 | 1.0	0.602 | 1.0	0.162 | 1.0	0.158 | 1.0	0.593 | 1.0	0.291 | 1.0	0.093 | 1.0	0.113 | 1.0	0.59 | 1.0	0.15 | 1.0	0.146 | 1.0	0.581 | 1.0
a2b1 complex_COL6A2	CPI-CS02566ED5C	complex:a2b1 complex	simple:P12110		ENSG00000142173	curated	TRUE	TRUE	1.093 | 1.0	0.073 | 1.0	1.872 | 1.0	1.753 | 1.0	0.16 | 1.0	1.537 | 1.0	1.355 | 1.0	1.754 | 1.0	0.16 | 1.0	1.537 | 1.0	1.355 | 1.0	1.097 | 1.0	0.077 | 1.0	1.876 | 1.0	1.753 | 1.0	0.159 | 1.0	1.536 | 1.0	1.354 | 1.0	0.0 | 1.0	0.0 | 1.0	0.0 | 1.0	1.752 | 1.0	0.159 | 1.0	1.536 | 1.0	1.354 | 1.0
a10b1 complex_COL6A2	CPI-CS08B45B4A5	complex:a10b1 complex	simple:P12110		ENSG00000142173	curated	TRUE	TRUE	1.096 | 1.0	0.076 | 1.0	1.875 | 1.0	1.755 | 1.0	0.162 | 1.0	1.538 | 1.0	1.357 | 1.0	1.756 | 1.0	0.162 | 1.0	1.539 | 1.0	1.357 | 1.0	1.095 | 1.0	0.075 | 1.0	1.874 | 1.0	1.76 | 1.0	0.166 | 1.0	1.543 | 1.0	1.361 | 1.0	1.093 | 1.0	0.073 | 1.0	1.872 | 1.0	1.754 | 1.0	0.16 | 1.0	1.537 | 1.0	1.355 | 1.0
a11b1 complex_COL6A2	CPI-CS0C323518C	complex:a11b1 complex	simple:P12110		ENSG00000142173	curated	TRUE	TRUE	1.092 | 1.0	0.072 | 1.0	1.871 | 1.0	1.753 | 1.0	0.16 | 1.0	1.537 | 1.0	1.355 | 1.0	1.754 | 1.0	0.161 | 1.0	1.537 | 1.0	1.356 | 1.0	1.103 | 1.0	0.083 | 1.0	1.882 | 1.0	1.757 | 1.0	0.163 | 1.0	1.54 | 1.0	1.358 | 1.0	1.103 | 1.0	0.083 | 1.0	1.882 | 1.0	1.754 | 1.0	0.16 | 1.0	1.537 | 1.0	1.355 | 1.0
a1b1 complex_COL6A2	CPI-CS04FB70A53	complex:a1b1 complex	simple:P12110		ENSG00000142173	curated	TRUE	TRUE	1.141 | 1.0	0.121 | 1.0	1.92 | 1.0	1.754 | 1.0	0.161 | 1.0	1.537 | 1.0	1.356 | 1.0	1.753 | 1.0	0.159 | 1.0	1.536 | 1.0	1.354 | 1.0	1.095 | 1.0	0.075 | 1.0	1.874 | 1.0	1.769 | 1.0	0.175 | 1.0	1.552 | 1.0	1.37 | 1.0	1.105 | 1.0	0.085 | 1.0	1.884 | 1.0	1.757 | 1.0	0.163 | 1.0	1.54 | 1.0	1.358 | 1.0
a2b1 complex_COL9A1	CPI-CS0EF80F577	complex:a2b1 complex	simple:P20849		ENSG00000112280	curated	TRUE	TRUE	0.009 | 1.0	0.01 | 1.0	0.003 | 1.0	0.007 | 1.0	0.01 | 1.0	0.006 | 1.0	0.004 | 1.0	0.007 | 1.0	0.01 | 1.0	0.007 | 1.0	0.004 | 1.0	0.013 | 1.0	0.015 | 1.0	0.007 | 1.0	0.006 | 1.0	0.009 | 1.0	0.006 | 1.0	0.003 | 1.0	0.0 | 1.0	0.0 | 1.0	0.0 | 1.0	0.006 | 1.0	0.009 | 1.0	0.005 | 1.0	0.003 | 1.0
a10b1 complex_COL9A1	CPI-CS0E37E6B34	complex:a10b1 complex	simple:P20849		ENSG00000112280	curated	TRUE	TRUE	0.012 | 1.0	0.014 | 1.0	0.006 | 1.0	0.008 | 1.0	0.012 | 1.0	0.008 | 1.0	0.006 | 1.0	0.009 | 1.0	0.012 | 1.0	0.009 | 1.0	0.006 | 1.0	0.011 | 1.0	0.012 | 1.0	0.005 | 1.0	0.013 | 1.0	0.016 | 1.0	0.013 | 1.0	0.011 | 1.0	0.009 | 1.0	0.01 | 1.0	0.003 | 1.0	0.007 | 1.0	0.01 | 1.0	0.007 | 1.0	0.004 | 1.0
a11b1 complex_COL9A1	CPI-CS0FD6D52C6	complex:a11b1 complex	simple:P20849		ENSG00000112280	curated	TRUE	TRUE	0.008 | 1.0	0.01 | 1.0	0.003 | 1.0	0.007 | 1.0	0.01 | 1.0	0.006 | 1.0	0.004 | 1.0	0.007 | 1.0	0.011 | 1.0	0.007 | 1.0	0.005 | 1.0	0.019 | 1.0	0.021 | 1.0	0.013 | 1.0	0.01 | 1.0	0.013 | 1.0	0.01 | 1.0	0.008 | 1.0	0.019 | 1.0	0.021 | 1.0	0.014 | 1.0	0.007 | 1.0	0.01 | 1.0	0.007 | 1.0	0.005 | 1.0
a1b1 complex_COL9A1	CPI-CS08A5619A7	complex:a1b1 complex	simple:P20849		ENSG00000112280	curated	TRUE	TRUE	0.057 | 1.0	0.059 | 1.0	0.052 | 1.0	0.007 | 1.0	0.011 | 1.0	0.007 | 1.0	0.005 | 1.0	0.006 | 1.0	0.009 | 1.0	0.006 | 1.0	0.003 | 1.0	0.011 | 1.0	0.012 | 1.0	0.005 | 1.0	0.022 | 1.0	0.025 | 1.0	0.022 | 1.0	0.019 | 1.0	0.021 | 1.0	0.023 | 1.0	0.016 | 1.0	0.01 | 1.0	0.013 | 1.0	0.01 | 1.0	0.008 | 1.0
a2b1 complex_COL16A1	CPI-CS0B4E149AB	complex:a2b1 complex	simple:Q07092		ENSG00000084636	curated	TRUE	TRUE	0.207 | 1.0	0.033 | 1.0	0.518 | 1.0	0.22 | 1.0	0.033 | 1.0	0.47 | 1.0	0.248 | 1.0	0.22 | 1.0	0.033 | 1.0	0.47 | 1.0	0.248 | 1.0	0.211 | 1.0	0.037 | 1.0	0.522 | 1.0	0.219 | 1.0	0.032 | 1.0	0.469 | 1.0	0.247 | 1.0	0.0 | 1.0	0.0 | 1.0	0.0 | 1.0	0.219 | 1.0	0.032 | 1.0	0.469 | 1.0	0.247 | 1.0
a10b1 complex_COL16A1	CPI-CS0871912DC	complex:a10b1 complex	simple:Q07092		ENSG00000084636	curated	TRUE	TRUE	0.21 | 1.0	0.037 | 1.0	0.521 | 1.0	0.222 | 1.0	0.034 | 1.0	0.472 | 1.0	0.25 | 1.0	0.222 | 1.0	0.035 | 1.0	0.472 | 1.0	0.251 | 1.0	0.209 | 1.0	0.035 | 1.0	0.52 | 1.0	0.226 | 1.0	0.039 | 1.0	0.476 | 1.0	0.255 | 1.0	0.207 | 1.0	0.033 | 1.0	0.518 | 1.0	0.22 | 1.0	0.033 | 1.0	0.47 | 1.0	0.248 | 1.0
a11b1 complex_COL16A1	CPI-CS075A8A661	complex:a11b1 complex	simple:Q07092		ENSG00000084636	curated	TRUE	TRUE	0.207 | 1.0	0.033 | 1.0	0.517 | 1.0	0.22 | 1.0	0.033 | 1.0	0.47 | 1.0	0.248 | 1.0	0.221 | 1.0	0.033 | 1.0	0.471 | 1.0	0.249 | 1.0	0.217 | 1.0	0.044 | 1.0	0.528 | 1.0	0.224 | 1.0	0.036 | 1.0	0.473 | 1.0	0.252 | 1.0	0.217 | 1.0	0.044 | 1.0	0.528 | 1.0	0.22 | 1.0	0.033 | 1.0	0.47 | 1.0	0.249 | 1.0
a1b1 complex_COL16A1	CPI-CS01CB84779	complex:a1b1 complex	simple:Q07092		ENSG00000084636	curated	TRUE	TRUE	0.255 | 1.0	0.082 | 1.0	0.566 | 1.0	0.221 | 1.0	0.034 | 1.0	0.471 | 1.0	0.249 | 1.0	0.219 | 1.0	0.032 | 1.0	0.469 | 1.0	0.248 | 1.0	0.209 | 1.0	0.035 | 1.0	0.52 | 1.0	0.235 | 1.0	0.048 | 1.0	0.485 | 1.0	0.263 | 1.0	0.22 | 1.0	0.046 | 1.0	0.53 | 1.0	0.223 | 1.0	0.036 | 1.0	0.473 | 1.0	0.252 | 1.0
a2b1 complex_COL6A6	CPI-CS0D502E46A	complex:a2b1 complex	simple:A6NMZ7		ENSG00000206384	curated	TRUE	TRUE	0.003 | 1.0	0.0 | 1.0	0.009 | 1.0	0.004 | 1.0	0.003 | 1.0	0.006 | 1.0	0.006 | 1.0	0.004 | 1.0	0.003 | 1.0	0.006 | 1.0	0.006 | 1.0	0.007 | 1.0	0.0 | 1.0	0.014 | 1.0	0.004 | 1.0	0.002 | 1.0	0.005 | 1.0	0.006 | 1.0	0.0 | 1.0	0.0 | 1.0	0.0 | 1.0	0.003 | 1.0	0.002 | 1.0	0.005 | 1.0	0.005 | 1.0
a10b1 complex_COL6A6	CPI-CS08E0D0E39	complex:a10b1 complex	simple:A6NMZ7		ENSG00000206384	curated	TRUE	TRUE	0.006 | 1.0	0.0 | 1.0	0.013 | 1.0	0.006 | 1.0	0.005 | 1.0	0.008 | 1.0	0.008 | 1.0	0.007 | 1.0	0.005 | 1.0	0.008 | 1.0	0.009 | 1.0	0.005 | 1.0	0.0 | 1.0	0.011 | 1.0	0.011 | 1.0	0.009 | 1.0	0.012 | 1.0	0.013 | 1.0	0.003 | 1.0	0.0 | 1.0	0.009 | 1.0	0.004 | 1.0	0.003 | 1.0	0.006 | 1.0	0.006 | 1.0
a11b1 complex_COL6A6	CPI-CS051511E8D	complex:a11b1 complex	simple:A6NMZ7		ENSG00000206384	curated	TRUE	TRUE	0.002 | 1.0	0.0 | 1.0	0.009 | 1.0	0.004 | 1.0	0.003 | 1.0	0.006 | 1.0	0.006 | 1.0	0.005 | 1.0	0.004 | 1.0	0.007 | 1.0	0.007 | 1.0	0.013 | 1.0	0.0 | 1.0	0.02 | 1.0	0.008 | 1.0	0.007 | 1.0	0.009 | 1.0	0.01 | 1.0	0.013 | 1.0	0.0 | 1.0	0.02 | 1.0	0.005 | 1.0	0.003 | 1.0	0.006 | 1.0	0.007 | 1.0
a1b1 complex_COL6A6	CPI-CS001CEABA9	complex:a1b1 complex	simple:A6NMZ7		ENSG00000206384	curated	TRUE	TRUE	0.051 | 1.0	0.0 | 1.0	0.058 | 1.0	0.005 | 1.0	0.004 | 1.0	0.007 | 1.0	0.007 | 1.0	0.004 | 1.0	0.002 | 1.0	0.005 | 1.0	0.006 | 1.0	0.005 | 1.0	0.0 | 1.0	0.011 | 1.0	0.019 | 1.0	0.018 | 1.0	0.021 | 1.0	0.021 | 1.0	0.015 | 1.0	0.0 | 1.0	0.022 | 1.0	0.008 | 1.0	0.006 | 1.0	0.009 | 1.0	0.01 | 1.0
a2b1 complex_COL6A5	CPI-CS0A00A71C6	complex:a2b1 complex	simple:A8TX70		ENSG00000172752	curated	TRUE	TRUE	0.007 | 1.0	0.01 | 1.0	0.003 | 1.0	0.007 | 1.0	0.002 | 1.0	0.004 | 1.0	0.01 | 1.0	0.007 | 1.0	0.002 | 1.0	0.004 | 1.0	0.01 | 1.0	0.011 | 1.0	0.015 | 1.0	0.007 | 1.0	0.006 | 1.0	0.001 | 1.0	0.003 | 1.0	0.009 | 1.0	0.0 | 1.0	0.0 | 1.0	0.0 | 1.0	0.006 | 1.0	0.001 | 1.0	0.003 | 1.0	0.009 | 1.0
a10b1 complex_COL6A5	CPI-CS0CA892219	complex:a10b1 complex	simple:A8TX70		ENSG00000172752	curated	TRUE	TRUE	0.01 | 1.0	0.014 | 1.0	0.006 | 1.0	0.008 | 1.0	0.004 | 1.0	0.005 | 1.0	0.012 | 1.0	0.009 | 1.0	0.005 | 1.0	0.006 | 1.0	0.013 | 1.0	0.008 | 1.0	0.012 | 1.0	0.005 | 1.0	0.013 | 1.0	0.009 | 1.0	0.01 | 1.0	0.017 | 1.0	0.006 | 1.0	0.01 | 1.0	0.003 | 1.0	0.007 | 1.0	0.002 | 1.0	0.004 | 1.0	0.01 | 1.0
a11b1 complex_COL6A5	CPI-CS0ADD714AE	complex:a11b1 complex	simple:A8TX70		ENSG00000172752	curated	TRUE	TRUE	0.006 | 1.0	0.01 | 1.0	0.003 | 1.0	0.007 | 1.0	0.002 | 1.0	0.004 | 1.0	0.01 | 1.0	0.007 | 1.0	0.003 | 1.0	0.004 | 1.0	0.011 | 1.0	0.017 | 1.0	0.021 | 1.0	0.013 | 1.0	0.01 | 1.0	0.006 | 1.0	0.007 | 1.0	0.014 | 1.0	0.017 | 1.0	0.021 | 1.0	0.014 | 1.0	0.007 | 1.0	0.003 | 1.0	0.004 | 1.0	0.011 | 1.0
a1b1 complex_COL6A5	CPI-CS0E553C7D6	complex:a1b1 complex	simple:A8TX70		ENSG00000172752	curated	TRUE	TRUE	0.055 | 1.0	0.059 | 1.0	0.052 | 1.0	0.007 | 1.0	0.003 | 1.0	0.004 | 1.0	0.011 | 1.0	0.006 | 1.0	0.002 | 1.0	0.003 | 1.0	0.01 | 1.0	0.008 | 1.0	0.012 | 1.0	0.005 | 1.0	0.022 | 1.0	0.017 | 1.0	0.019 | 1.0	0.025 | 1.0	0.019 | 1.0	0.023 | 1.0	0.016 | 1.0	0.01 | 1.0	0.006 | 1.0	0.007 | 1.0	0.014 | 1.0
a2b1 complex_COL5A2	CPI-CS0A15AD0C2	complex:a2b1 complex	simple:P05997		ENSG00000204262	curated	TRUE	TRUE	0.126 | 1.0	0.004 | 1.0	0.36 | 1.0	0.157 | 1.0	0.02 | 1.0	0.296 | 1.0	0.183 | 1.0	0.157 | 1.0	0.02 | 1.0	0.296 | 1.0	0.183 | 1.0	0.13 | 1.0	0.008 | 1.0	0.364 | 1.0	0.156 | 1.0	0.019 | 1.0	0.296 | 1.0	0.182 | 1.0	0.0 | 1.0	0.0 | 1.0	0.0 | 1.0	0.156 | 1.0	0.019 | 1.0	0.295 | 1.0	0.182 | 1.0
a10b1 complex_COL5A2	CPI-CS0458264C5	complex:a10b1 complex	simple:P05997		ENSG00000204262	curated	TRUE	TRUE	0.129 | 1.0	0.008 | 1.0	0.363 | 1.0	0.158 | 1.0	0.022 | 1.0	0.298 | 1.0	0.185 | 1.0	0.159 | 1.0	0.022 | 1.0	0.299 | 1.0	0.185 | 1.0	0.128 | 1.0	0.006 | 1.0	0.362 | 1.0	0.163 | 1.0	0.026 | 1.0	0.303 | 1.0	0.19 | 1.0	0.126 | 1.0	0.004 | 1.0	0.36 | 1.0	0.157 | 1.0	0.02 | 1.0	0.296 | 1.0	0.183 | 1.0
a11b1 complex_COL5A2	CPI-CS0D5775EA2	complex:a11b1 complex	simple:P05997		ENSG00000204262	curated	TRUE	TRUE	0.126 | 1.0	0.004 | 1.0	0.36 | 1.0	0.157 | 1.0	0.02 | 1.0	0.296 | 1.0	0.183 | 1.0	0.157 | 1.0	0.021 | 1.0	0.297 | 1.0	0.184 | 1.0	0.136 | 1.0	0.015 | 1.0	0.37 | 1.0	0.16 | 1.0	0.023 | 1.0	0.3 | 1.0	0.187 | 1.0	0.136 | 1.0	0.015 | 1.0	0.371 | 1.0	0.157 | 1.0	0.02 | 1.0	0.297 | 1.0	0.184 | 1.0
a1b1 complex_COL5A2	CPI-CS0DDF935C1	complex:a1b1 complex	simple:P05997		ENSG00000204262	curated	TRUE	TRUE	0.174 | 1.0	0.053 | 1.0	0.409 | 1.0	0.158 | 1.0	0.021 | 1.0	0.297 | 1.0	0.184 | 1.0	0.156 | 1.0	0.019 | 1.0	0.296 | 1.0	0.182 | 1.0	0.128 | 1.0	0.006 | 1.0	0.362 | 1.0	0.172 | 1.0	0.035 | 1.0	0.311 | 1.0	0.198 | 1.0	0.139 | 1.0	0.017 | 1.0	0.373 | 1.0	0.16 | 1.0	0.023 | 1.0	0.3 | 1.0	0.187 | 1.0
a2b1 complex_COL11A1	CPI-CS0DD23C021	complex:a2b1 complex	simple:P12107		ENSG00000060718	curated	TRUE	TRUE	0.008 | 1.0	0.008 | 1.0	0.049 | 1.0	0.009 | 1.0	0.011 | 1.0	0.034 | 1.0	0.015 | 1.0	0.009 | 1.0	0.011 | 1.0	0.035 | 1.0	0.016 | 1.0	0.012 | 1.0	0.012 | 1.0	0.053 | 1.0	0.008 | 1.0	0.011 | 1.0	0.034 | 1.0	0.015 | 1.0	0.0 | 1.0	0.0 | 1.0	0.0 | 1.0	0.008 | 1.0	0.01 | 1.0	0.033 | 1.0	0.014 | 1.0
a10b1 complex_COL11A1	CPI-CS0B31C2B03	complex:a10b1 complex	simple:P12107		ENSG00000060718	curated	TRUE	TRUE	0.011 | 1.0	0.012 | 1.0	0.052 | 1.0	0.011 | 1.0	0.013 | 1.0	0.036 | 1.0	0.017 | 1.0	0.011 | 1.0	0.014 | 1.0	0.037 | 1.0	0.018 | 1.0	0.01 | 1.0	0.01 | 1.0	0.051 | 1.0	0.015 | 1.0	0.018 | 1.0	0.041 | 1.0	0.022 | 1.0	0.008 | 1.0	0.008 | 1.0	0.049 | 1.0	0.009 | 1.0	0.011 | 1.0	0.035 | 1.0	0.016 | 1.0
a11b1 complex_COL11A1	CPI-CS03FB91542	complex:a11b1 complex	simple:P12107		ENSG00000060718	curated	TRUE	TRUE	0.007 | 1.0	0.008 | 1.0	0.049 | 1.0	0.009 | 1.0	0.011 | 1.0	0.034 | 1.0	0.015 | 1.0	0.01 | 1.0	0.012 | 1.0	0.035 | 1.0	0.016 | 1.0	0.018 | 1.0	0.019 | 1.0	0.059 | 1.0	0.012 | 1.0	0.015 | 1.0	0.038 | 1.0	0.019 | 1.0	0.018 | 1.0	0.019 | 1.0	0.059 | 1.0	0.009 | 1.0	0.012 | 1.0	0.035 | 1.0	0.016 | 1.0
a1b1 complex_COL11A1	CPI-CS0C90BE49B	complex:a1b1 complex	simple:P12107		ENSG00000060718	curated	TRUE	TRUE	0.056 | 1.0	0.057 | 1.0	0.098 | 1.0	0.01 | 1.0	0.012 | 1.0	0.035 | 1.0	0.016 | 1.0	0.008 | 1.0	0.011 | 1.0	0.034 | 1.0	0.015 | 1.0	0.01 | 1.0	0.01 | 1.0	0.051 | 1.0	0.024 | 1.0	0.026 | 1.0	0.049 | 1.0	0.031 | 1.0	0.02 | 1.0	0.021 | 1.0	0.062 | 1.0	0.012 | 1.0	0.015 | 1.0	0.038 | 1.0	0.019 | 1.0
a2b1 complex_COL6A1	CPI-CS03465F9E1	complex:a2b1 complex	simple:P12109		ENSG00000142156	curated	TRUE	TRUE	0.039 | 1.0	0.006 | 1.0	0.08 | 1.0	0.074 | 1.0	0.005 | 1.0	0.079 | 1.0	0.051 | 1.0	0.074 | 1.0	0.005 | 1.0	0.079 | 1.0	0.051 | 1.0	0.043 | 1.0	0.01 | 1.0	0.085 | 1.0	0.073 | 1.0	0.005 | 1.0	0.078 | 1.0	0.05 | 1.0	0.0 | 1.0	0.0 | 1.0	0.0 | 1.0	0.073 | 1.0	0.004 | 1.0	0.078 | 1.0	0.05 | 1.0
a10b1 complex_COL6A1	CPI-CS061FF8FB3	complex:a10b1 complex	simple:P12109		ENSG00000142156	curated	TRUE	TRUE	0.042 | 1.0	0.01 | 1.0	0.084 | 1.0	0.076 | 1.0	0.007 | 1.0	0.081 | 1.0	0.052 | 1.0	0.076 | 1.0	0.008 | 1.0	0.081 | 1.0	0.053 | 1.0	0.041 | 1.0	0.008 | 1.0	0.082 | 1.0	0.081 | 1.0	0.012 | 1.0	0.085 | 1.0	0.057 | 1.0	0.039 | 1.0	0.006 | 1.0	0.08 | 1.0	0.074 | 1.0	0.005 | 1.0	0.079 | 1.0	0.051 | 1.0
a11b1 complex_COL6A1	CPI-CS0AD401B3B	complex:a11b1 complex	simple:P12109		ENSG00000142156	curated	TRUE	TRUE	0.038 | 1.0	0.006 | 1.0	0.08 | 1.0	0.074 | 1.0	0.005 | 1.0	0.079 | 1.0	0.051 | 1.0	0.075 | 1.0	0.006 | 1.0	0.08 | 1.0	0.051 | 1.0	0.049 | 1.0	0.017 | 1.0	0.091 | 1.0	0.078 | 1.0	0.009 | 1.0	0.082 | 1.0	0.054 | 1.0	0.049 | 1.0	0.017 | 1.0	0.091 | 1.0	0.075 | 1.0	0.006 | 1.0	0.079 | 1.0	0.051 | 1.0
a1b1 complex_COL6A1	CPI-CS04721C346	complex:a1b1 complex	simple:P12109		ENSG00000142156	curated	TRUE	TRUE	0.087 | 1.0	0.055 | 1.0	0.129 | 1.0	0.075 | 1.0	0.006 | 1.0	0.08 | 1.0	0.051 | 1.0	0.073 | 1.0	0.005 | 1.0	0.078 | 1.0	0.05 | 1.0	0.041 | 1.0	0.008 | 1.0	0.082 | 1.0	0.089 | 1.0	0.02 | 1.0	0.094 | 1.0	0.066 | 1.0	0.051 | 1.0	0.019 | 1.0	0.093 | 1.0	0.078 | 1.0	0.009 | 1.0	0.082 | 1.0	0.054 | 1.0
a2b1 complex_COL11A2	CPI-CS07F0FBE47	complex:a2b1 complex	simple:P13942		ENSG00000204248	curated	TRUE	TRUE	0.009 | 1.0	0.006 | 1.0	0.006 | 1.0	0.002 | 1.0	0.004 | 1.0	0.004 | 1.0	0.003 | 1.0	0.002 | 1.0	0.005 | 1.0	0.004 | 1.0	0.003 | 1.0	0.013 | 1.0	0.01 | 1.0	0.01 | 1.0	0.002 | 1.0	0.004 | 1.0	0.003 | 1.0	0.002 | 1.0	0.0 | 1.0	0.0 | 1.0	0.0 | 1.0	0.001 | 1.0	0.003 | 1.0	0.003 | 1.0	0.002 | 1.0
a10b1 complex_COL11A2	CPI-CS0331C9408	complex:a10b1 complex	simple:P13942		ENSG00000204248	curated	TRUE	TRUE	0.012 | 1.0	0.01 | 1.0	0.01 | 1.0	0.004 | 1.0	0.006 | 1.0	0.005 | 1.0	0.004 | 1.0	0.005 | 1.0	0.007 | 1.0	0.006 | 1.0	0.005 | 1.0	0.011 | 1.0	0.008 | 1.0	0.008 | 1.0	0.009 | 1.0	0.011 | 1.0	0.01 | 1.0	0.009 | 1.0	0.009 | 1.0	0.006 | 1.0	0.006 | 1.0	0.002 | 1.0	0.005 | 1.0	0.004 | 1.0	0.003 | 1.0
a11b1 complex_COL11A2	CPI-CS002BE4E1D	complex:a11b1 complex	simple:P13942		ENSG00000204248	curated	TRUE	TRUE	0.008 | 1.0	0.006 | 1.0	0.006 | 1.0	0.002 | 1.0	0.004 | 1.0	0.004 | 1.0	0.003 | 1.0	0.003 | 1.0	0.005 | 1.0	0.004 | 1.0	0.003 | 1.0	0.019 | 1.0	0.017 | 1.0	0.017 | 1.0	0.006 | 1.0	0.008 | 1.0	0.007 | 1.0	0.006 | 1.0	0.019 | 1.0	0.017 | 1.0	0.017 | 1.0	0.003 | 1.0	0.005 | 1.0	0.004 | 1.0	0.003 | 1.0
a1b1 complex_COL11A2	CPI-CS0D84192A3	complex:a1b1 complex	simple:P13942		ENSG00000204248	curated	TRUE	TRUE	0.057 | 1.0	0.055 | 1.0	0.055 | 1.0	0.003 | 1.0	0.005 | 1.0	0.004 | 1.0	0.003 | 1.0	0.002 | 1.0	0.004 | 1.0	0.003 | 1.0	0.002 | 1.0	0.011 | 1.0	0.008 | 1.0	0.008 | 1.0	0.017 | 1.0	0.02 | 1.0	0.019 | 1.0	0.018 | 1.0	0.021 | 1.0	0.019 | 1.0	0.019 | 1.0	0.006 | 1.0	0.008 | 1.0	0.007 | 1.0	0.006 | 1.0
a2b1 complex_COL8A2	CPI-CS07D2CAF79	complex:a2b1 complex	simple:P25067		ENSG00000171812	curated	TRUE	TRUE	0.107 | 1.0	0.004 | 1.0	0.053 | 1.0	0.085 | 1.0	0.014 | 1.0	0.059 | 1.0	0.055 | 1.0	0.085 | 1.0	0.014 | 1.0	0.059 | 1.0	0.055 | 1.0	0.111 | 1.0	0.008 | 1.0	0.057 | 1.0	0.084 | 1.0	0.013 | 1.0	0.058 | 1.0	0.054 | 1.0	0.0 | 1.0	0.0 | 1.0	0.0 | 1.0	0.084 | 1.0	0.013 | 1.0	0.058 | 1.0	0.054 | 1.0
a10b1 complex_COL8A2	CPI-CS068D4392F	complex:a10b1 complex	simple:P25067		ENSG00000171812	curated	TRUE	TRUE	0.11 | 1.0	0.008 | 1.0	0.057 | 1.0	0.087 | 1.0	0.015 | 1.0	0.061 | 1.0	0.057 | 1.0	0.087 | 1.0	0.016 | 1.0	0.061 | 1.0	0.057 | 1.0	0.109 | 1.0	0.006 | 1.0	0.055 | 1.0	0.091 | 1.0	0.02 | 1.0	0.065 | 1.0	0.061 | 1.0	0.107 | 1.0	0.004 | 1.0	0.053 | 1.0	0.085 | 1.0	0.014 | 1.0	0.059 | 1.0	0.055 | 1.0
a11b1 complex_COL8A2	CPI-CS03314DAF3	complex:a11b1 complex	simple:P25067		ENSG00000171812	curated	TRUE	TRUE	0.107 | 1.0	0.004 | 1.0	0.053 | 1.0	0.085 | 1.0	0.014 | 1.0	0.059 | 1.0	0.055 | 1.0	0.086 | 1.0	0.014 | 1.0	0.06 | 1.0	0.056 | 1.0	0.117 | 1.0	0.015 | 1.0	0.064 | 1.0	0.088 | 1.0	0.017 | 1.0	0.062 | 1.0	0.058 | 1.0	0.117 | 1.0	0.015 | 1.0	0.064 | 1.0	0.085 | 1.0	0.014 | 1.0	0.059 | 1.0	0.055 | 1.0
a1b1 complex_COL8A2	CPI-CS054454CF3	complex:a1b1 complex	simple:P25067		ENSG00000171812	curated	TRUE	TRUE	0.155 | 1.0	0.053 | 1.0	0.102 | 1.0	0.086 | 1.0	0.015 | 1.0	0.06 | 1.0	0.056 | 1.0	0.084 | 1.0	0.013 | 1.0	0.058 | 1.0	0.054 | 1.0	0.109 | 1.0	0.006 | 1.0	0.055 | 1.0	0.1 | 1.0	0.029 | 1.0	0.074 | 1.0	0.07 | 1.0	0.12 | 1.0	0.017 | 1.0	0.066 | 1.0	0.088 | 1.0	0.017 | 1.0	0.062 | 1.0	0.058 | 1.0
a2b1 complex_COL5A3	CPI-CS0CFC2A055	complex:a2b1 complex	simple:P25940		ENSG00000080573	curated	TRUE	TRUE	0.009 | 1.0	0.006 | 1.0	0.146 | 1.0	0.024 | 1.0	0.005 | 1.0	0.095 | 1.0	0.016 | 1.0	0.024 | 1.0	0.005 | 1.0	0.095 | 1.0	0.016 | 1.0	0.013 | 1.0	0.01 | 1.0	0.15 | 1.0	0.024 | 1.0	0.005 | 1.0	0.095 | 1.0	0.016 | 1.0	0.0 | 1.0	0.0 | 1.0	0.0 | 1.0	0.023 | 1.0	0.004 | 1.0	0.094 | 1.0	0.015 | 1.0
a10b1 complex_COL5A3	CPI-CS0DCFE9DA5	complex:a10b1 complex	simple:P25940		ENSG00000080573	curated	TRUE	TRUE	0.012 | 1.0	0.01 | 1.0	0.149 | 1.0	0.026 | 1.0	0.007 | 1.0	0.097 | 1.0	0.018 | 1.0	0.027 | 1.0	0.008 | 1.0	0.098 | 1.0	0.019 | 1.0	0.011 | 1.0	0.008 | 1.0	0.148 | 1.0	0.031 | 1.0	0.012 | 1.0	0.102 | 1.0	0.023 | 1.0	0.009 | 1.0	0.006 | 1.0	0.146 | 1.0	0.024 | 1.0	0.005 | 1.0	0.095 | 1.0	0.016 | 1.0
a11b1 complex_COL5A3	CPI-CS0A10D5175	complex:a11b1 complex	simple:P25940		ENSG00000080573	curated	TRUE	TRUE	0.009 | 1.0	0.006 | 1.0	0.146 | 1.0	0.024 | 1.0	0.005 | 1.0	0.095 | 1.0	0.016 | 1.0	0.025 | 1.0	0.006 | 1.0	0.096 | 1.0	0.017 | 1.0	0.02 | 1.0	0.017 | 1.0	0.156 | 1.0	0.028 | 1.0	0.009 | 1.0	0.099 | 1.0	0.02 | 1.0	0.02 | 1.0	0.017 | 1.0	0.157 | 1.0	0.025 | 1.0	0.006 | 1.0	0.096 | 1.0	0.017 | 1.0
a1b1 complex_COL5A3	CPI-CS0BE9C0135	complex:a1b1 complex	simple:P25940		ENSG00000080573	curated	TRUE	TRUE	0.058 | 1.0	0.055 | 1.0	0.195 | 1.0	0.025 | 1.0	0.006 | 1.0	0.096 | 1.0	0.017 | 1.0	0.024 | 1.0	0.005 | 1.0	0.095 | 1.0	0.016 | 1.0	0.011 | 1.0	0.008 | 1.0	0.148 | 1.0	0.039 | 1.0	0.02 | 1.0	0.11 | 1.0	0.031 | 1.0	0.022 | 1.0	0.019 | 1.0	0.159 | 1.0	0.028 | 1.0	0.009 | 1.0	0.099 | 1.0	0.02 | 1.0
a2b1 complex_COL15A1	CPI-CS08BFF8C2C	complex:a2b1 complex	simple:P39059		ENSG00000204291	curated	TRUE	TRUE	0.17 | 1.0	0.008 | 1.0	0.055 | 1.0	0.092 | 1.0	0.014 | 1.0	0.058 | 1.0	0.051 | 1.0	0.092 | 1.0	0.014 | 1.0	0.058 | 1.0	0.051 | 1.0	0.174 | 1.0	0.012 | 1.0	0.059 | 1.0	0.092 | 1.0	0.014 | 1.0	0.057 | 1.0	0.05 | 1.0	0.0 | 1.0	0.0 | 1.0	0.0 | 1.0	0.091 | 1.0	0.013 | 1.0	0.057 | 1.0	0.05 | 1.0
a10b1 complex_COL15A1	CPI-CS0605899FA	complex:a10b1 complex	simple:P39059		ENSG00000204291	curated	TRUE	TRUE	0.173 | 1.0	0.012 | 1.0	0.059 | 1.0	0.094 | 1.0	0.016 | 1.0	0.06 | 1.0	0.052 | 1.0	0.095 | 1.0	0.017 | 1.0	0.06 | 1.0	0.053 | 1.0	0.172 | 1.0	0.01 | 1.0	0.057 | 1.0	0.099 | 1.0	0.021 | 1.0	0.065 | 1.0	0.057 | 1.0	0.17 | 1.0	0.008 | 1.0	0.055 | 1.0	0.092 | 1.0	0.014 | 1.0	0.058 | 1.0	0.051 | 1.0
a11b1 complex_COL15A1	CPI-CS0FA891A57	complex:a11b1 complex	simple:P39059		ENSG00000204291	curated	TRUE	TRUE	0.17 | 1.0	0.008 | 1.0	0.055 | 1.0	0.092 | 1.0	0.014 | 1.0	0.058 | 1.0	0.051 | 1.0	0.093 | 1.0	0.015 | 1.0	0.059 | 1.0	0.051 | 1.0	0.18 | 1.0	0.019 | 1.0	0.066 | 1.0	0.096 | 1.0	0.018 | 1.0	0.062 | 1.0	0.054 | 1.0	0.18 | 1.0	0.019 | 1.0	0.066 | 1.0	0.093 | 1.0	0.015 | 1.0	0.059 | 1.0	0.051 | 1.0
a1b1 complex_COL15A1	CPI-CS0B4BD17EC	complex:a1b1 complex	simple:P39059		ENSG00000204291	curated	TRUE	TRUE	0.218 | 1.0	0.057 | 1.0	0.104 | 1.0	0.093 | 1.0	0.015 | 1.0	0.059 | 1.0	0.051 | 1.0	0.092 | 1.0	0.014 | 1.0	0.057 | 1.0	0.05 | 1.0	0.172 | 1.0	0.01 | 1.0	0.057 | 1.0	0.107 | 1.0	0.029 | 1.0	0.073 | 1.0	0.066 | 1.0	0.183 | 1.0	0.021 | 1.0	0.068 | 1.0	0.096 | 1.0	0.018 | 1.0	0.062 | 1.0	0.054 | 1.0
a2b1 complex_COL18A1	CPI-CS0F27BD288	complex:a2b1 complex	simple:P39060		ENSG00000182871	curated	TRUE	TRUE	0.257 | 1.0	0.208 | 1.0	0.037 | 1.0	0.801 | 1.0	0.221 | 1.0	0.074 | 1.0	0.478 | 1.0	0.801 | 1.0	0.221 | 1.0	0.074 | 1.0	0.478 | 1.0	0.261 | 1.0	0.212 | 1.0	0.041 | 1.0	0.8 | 1.0	0.22 | 1.0	0.073 | 1.0	0.477 | 1.0	0.0 | 1.0	0.0 | 1.0	0.0 | 1.0	0.8 | 1.0	0.22 | 1.0	0.073 | 1.0	0.477 | 1.0
a10b1 complex_COL18A1	CPI-CS0D3A5EF39	complex:a10b1 complex	simple:P39060		ENSG00000182871	curated	TRUE	TRUE	0.26 | 1.0	0.211 | 1.0	0.04 | 1.0	0.803 | 1.0	0.222 | 1.0	0.076 | 1.0	0.48 | 1.0	0.803 | 1.0	0.223 | 1.0	0.076 | 1.0	0.481 | 1.0	0.259 | 1.0	0.21 | 1.0	0.039 | 1.0	0.808 | 1.0	0.227 | 1.0	0.08 | 1.0	0.485 | 1.0	0.257 | 1.0	0.207 | 1.0	0.037 | 1.0	0.801 | 1.0	0.221 | 1.0	0.074 | 1.0	0.478 | 1.0
a11b1 complex_COL18A1	CPI-CS0F4339EDF	complex:a11b1 complex	simple:P39060		ENSG00000182871	curated	TRUE	TRUE	0.257 | 1.0	0.207 | 1.0	0.036 | 1.0	0.801 | 1.0	0.221 | 1.0	0.074 | 1.0	0.478 | 1.0	0.802 | 1.0	0.221 | 1.0	0.075 | 1.0	0.479 | 1.0	0.267 | 1.0	0.218 | 1.0	0.047 | 1.0	0.805 | 1.0	0.224 | 1.0	0.077 | 1.0	0.482 | 1.0	0.267 | 1.0	0.218 | 1.0	0.047 | 1.0	0.802 | 1.0	0.221 | 1.0	0.074 | 1.0	0.479 | 1.0
a1b1 complex_COL18A1	CPI-CS0217F6EB1	complex:a1b1 complex	simple:P39060		ENSG00000182871	curated	TRUE	TRUE	0.305 | 1.0	0.256 | 1.0	0.085 | 1.0	0.802 | 1.0	0.222 | 1.0	0.075 | 1.0	0.479 | 1.0	0.8 | 1.0	0.22 | 1.0	0.073 | 1.0	0.478 | 1.0	0.259 | 1.0	0.21 | 1.0	0.039 | 1.0	0.816 | 1.0	0.236 | 1.0	0.089 | 1.0	0.493 | 1.0	0.27 | 1.0	0.22 | 1.0	0.049 | 1.0	0.805 | 1.0	0.224 | 1.0	0.077 | 1.0	0.482 | 1.0
a2b1 complex_COL4A3	CPI-CS0D6E21143	complex:a2b1 complex	simple:Q01955		ENSG00000169031	curated	TRUE	TRUE	0.004 | 1.0	0.006 | 1.0	0.0 | 1.0	0.002 | 1.0	0.002 | 1.0	0.003 | 1.0	0.003 | 1.0	0.002 | 1.0	0.002 | 1.0	0.003 | 1.0	0.003 | 1.0	0.008 | 1.0	0.01 | 1.0	0.0 | 1.0	0.002 | 1.0	0.001 | 1.0	0.002 | 1.0	0.003 | 1.0	0.0 | 1.0	0.0 | 1.0	0.0 | 1.0	0.001 | 1.0	0.001 | 1.0	0.002 | 1.0	0.002 | 1.0
a10b1 complex_COL4A3	CPI-CS0CF0AE9CA	complex:a10b1 complex	simple:Q01955		ENSG00000169031	curated	TRUE	TRUE	0.007 | 1.0	0.01 | 1.0	0.0 | 1.0	0.004 | 1.0	0.004 | 1.0	0.005 | 1.0	0.005 | 1.0	0.005 | 1.0	0.005 | 1.0	0.005 | 1.0	0.006 | 1.0	0.006 | 1.0	0.008 | 1.0	0.0 | 1.0	0.009 | 1.0	0.009 | 1.0	0.009 | 1.0	0.01 | 1.0	0.004 | 1.0	0.006 | 1.0	0.0 | 1.0	0.002 | 1.0	0.002 | 1.0	0.003 | 1.0	0.003 | 1.0
a11b1 complex_COL4A3	CPI-CS097C514B9	complex:a11b1 complex	simple:Q01955		ENSG00000169031	curated	TRUE	TRUE	0.003 | 1.0	0.006 | 1.0	0.0 | 1.0	0.002 | 1.0	0.002 | 1.0	0.003 | 1.0	0.003 | 1.0	0.003 | 1.0	0.003 | 1.0	0.004 | 1.0	0.004 | 1.0	0.014 | 1.0	0.017 | 1.0	0.0 | 1.0	0.006 | 1.0	0.006 | 1.0	0.006 | 1.0	0.007 | 1.0	0.014 | 1.0	0.017 | 1.0	0.0 | 1.0	0.003 | 1.0	0.003 | 1.0	0.003 | 1.0	0.004 | 1.0
a1b1 complex_COL4A3	CPI-CS0EDC9FD97	complex:a1b1 complex	simple:Q01955		ENSG00000169031	curated	TRUE	TRUE	0.052 | 1.0	0.055 | 1.0	0.0 | 1.0	0.003 | 1.0	0.003 | 1.0	0.004 | 1.0	0.004 | 1.0	0.002 | 1.0	0.002 | 1.0	0.002 | 1.0	0.003 | 1.0	0.006 | 1.0	0.008 | 1.0	0.0 | 1.0	0.017 | 1.0	0.017 | 1.0	0.018 | 1.0	0.018 | 1.0	0.016 | 1.0	0.019 | 1.0	0.0 | 1.0	0.006 | 1.0	0.006 | 1.0	0.006 | 1.0	0.007 | 1.0
a2b1 complex_COL19A1	CPI-CS00EC98A3C	complex:a2b1 complex	simple:Q14993		ENSG00000082293	curated	TRUE	TRUE	0.004 | 1.0	0.008 | 1.0	0.003 | 1.0	0.003 | 1.0	0.002 | 1.0	0.0 | 1.0	0.002 | 1.0	0.003 | 1.0	0.002 | 1.0	0.0 | 1.0	0.002 | 1.0	0.008 | 1.0	0.012 | 1.0	0.007 | 1.0	0.002 | 1.0	0.001 | 1.0	0.0 | 1.0	0.001 | 1.0	0.0 | 1.0	0.0 | 1.0	0.0 | 1.0	0.002 | 1.0	0.001 | 1.0	0.0 | 1.0	0.001 | 1.0
a10b1 complex_COL19A1	CPI-CS06CFA622C	complex:a10b1 complex	simple:Q14993		ENSG00000082293	curated	TRUE	TRUE	0.007 | 1.0	0.012 | 1.0	0.006 | 1.0	0.005 | 1.0	0.004 | 1.0	0.0 | 1.0	0.004 | 1.0	0.005 | 1.0	0.005 | 1.0	0.0 | 1.0	0.005 | 1.0	0.006 | 1.0	0.01 | 1.0	0.005 | 1.0	0.009 | 1.0	0.009 | 1.0	0.0 | 1.0	0.009 | 1.0	0.004 | 1.0	0.008 | 1.0	0.003 | 1.0	0.003 | 1.0	0.002 | 1.0	0.0 | 1.0	0.002 | 1.0
a11b1 complex_COL19A1	CPI-CS0AA4083E0	complex:a11b1 complex	simple:Q14993		ENSG00000082293	curated	TRUE	TRUE	0.003 | 1.0	0.008 | 1.0	0.003 | 1.0	0.003 | 1.0	0.002 | 1.0	0.0 | 1.0	0.002 | 1.0	0.004 | 1.0	0.003 | 1.0	0.0 | 1.0	0.003 | 1.0	0.014 | 1.0	0.019 | 1.0	0.013 | 1.0	0.006 | 1.0	0.006 | 1.0	0.0 | 1.0	0.006 | 1.0	0.014 | 1.0	0.019 | 1.0	0.014 | 1.0	0.003 | 1.0	0.003 | 1.0	0.0 | 1.0	0.003 | 1.0
a1b1 complex_COL19A1	CPI-CS092D10FD5	complex:a1b1 complex	simple:Q14993		ENSG00000082293	curated	TRUE	TRUE	0.052 | 1.0	0.057 | 1.0	0.052 | 1.0	0.004 | 1.0	0.003 | 1.0	0.0 | 1.0	0.003 | 1.0	0.002 | 1.0	0.002 | 1.0	0.0 | 1.0	0.002 | 1.0	0.006 | 1.0	0.01 | 1.0	0.005 | 1.0	0.018 | 1.0	0.017 | 1.0	0.0 | 1.0	0.017 | 1.0	0.016 | 1.0	0.021 | 1.0	0.016 | 1.0	0.006 | 1.0	0.006 | 1.0	0.0 | 1.0	0.006 | 1.0
a2b1 complex_COL28A1	CPI-CS0DC217258	complex:a2b1 complex	simple:Q2UY09		ENSG00000215018	curated	TRUE	TRUE	0.004 | 1.0	0.01 | 1.0	0.003 | 1.0	0.002 | 1.0	0.002 | 1.0	0.002 | 1.0	0.002 | 1.0	0.002 | 1.0	0.002 | 1.0	0.002 | 1.0	0.002 | 1.0	0.008 | 1.0	0.015 | 1.0	0.007 | 1.0	0.001 | 1.0	0.001 | 1.0	0.001 | 1.0	0.001 | 1.0	0.0 | 1.0	0.0 | 1.0	0.0 | 1.0	0.001 | 1.0	0.001 | 1.0	0.001 | 1.0	0.001 | 1.0
a10b1 complex_COL28A1	CPI-CS037F11D6B	complex:a10b1 complex	simple:Q2UY09		ENSG00000215018	curated	TRUE	TRUE	0.008 | 1.0	0.014 | 1.0	0.006 | 1.0	0.004 | 1.0	0.004 | 1.0	0.004 | 1.0	0.004 | 1.0	0.004 | 1.0	0.005 | 1.0	0.005 | 1.0	0.004 | 1.0	0.006 | 1.0	0.012 | 1.0	0.005 | 1.0	0.008 | 1.0	0.009 | 1.0	0.009 | 1.0	0.008 | 1.0	0.004 | 1.0	0.01 | 1.0	0.003 | 1.0	0.002 | 1.0	0.002 | 1.0	0.002 | 1.0	0.002 | 1.0
a11b1 complex_COL28A1	CPI-CS097450DBB	complex:a11b1 complex	simple:Q2UY09		ENSG00000215018	curated	TRUE	TRUE	0.004 | 1.0	0.01 | 1.0	0.003 | 1.0	0.002 | 1.0	0.002 | 1.0	0.002 | 1.0	0.002 | 1.0	0.003 | 1.0	0.003 | 1.0	0.003 | 1.0	0.003 | 1.0	0.015 | 1.0	0.021 | 1.0	0.013 | 1.0	0.005 | 1.0	0.006 | 1.0	0.006 | 1.0	0.005 | 1.0	0.015 | 1.0	0.021 | 1.0	0.014 | 1.0	0.002 | 1.0	0.003 | 1.0	0.003 | 1.0	0.002 | 1.0
a1b1 complex_COL28A1	CPI-CS0D5E8EC32	complex:a1b1 complex	simple:Q2UY09		ENSG00000215018	curated	TRUE	TRUE	0.053 | 1.0	0.059 | 1.0	0.052 | 1.0	0.003 | 1.0	0.003 | 1.0	0.003 | 1.0	0.003 | 1.0	0.001 | 1.0	0.002 | 1.0	0.001 | 1.0	0.001 | 1.0	0.006 | 1.0	0.012 | 1.0	0.005 | 1.0	0.017 | 1.0	0.017 | 1.0	0.017 | 1.0	0.017 | 1.0	0.017 | 1.0	0.023 | 1.0	0.016 | 1.0	0.005 | 1.0	0.006 | 1.0	0.006 | 1.0	0.005 | 1.0
a2b1 complex_COL13A1	CPI-CS0EEEC14D1	complex:a2b1 complex	simple:Q5TAT6		ENSG00000197467	curated	FALSE	TRUE	0.179 | 1.0	0.01 | 1.0	0.015 | 1.0	0.047 | 1.0	0.005 | 1.0	0.014 | 1.0	0.037 | 1.0	0.047 | 1.0	0.005 | 1.0	0.014 | 1.0	0.037 | 1.0	0.183 | 1.0	0.015 | 1.0	0.019 | 1.0	0.046 | 1.0	0.005 | 1.0	0.014 | 1.0	0.037 | 1.0	0.0 | 1.0	0.0 | 1.0	0.0 | 1.0	0.046 | 1.0	0.004 | 1.0	0.013 | 1.0	0.036 | 1.0
a10b1 complex_COL13A1	CPI-CS0B8ACEA1B	complex:a10b1 complex	simple:Q5TAT6		ENSG00000197467	curated	FALSE	TRUE	0.183 | 1.0	0.014 | 1.0	0.018 | 1.0	0.049 | 1.0	0.007 | 1.0	0.016 | 1.0	0.039 | 1.0	0.049 | 1.0	0.008 | 1.0	0.017 | 1.0	0.04 | 1.0	0.181 | 1.0	0.012 | 1.0	0.017 | 1.0	0.054 | 1.0	0.012 | 1.0	0.021 | 1.0	0.044 | 1.0	0.179 | 1.0	0.01 | 1.0	0.015 | 1.0	0.047 | 1.0	0.005 | 1.0	0.014 | 1.0	0.037 | 1.0
a11b1 complex_COL13A1	CPI-CS006801CF7	complex:a11b1 complex	simple:Q5TAT6		ENSG00000197467	curated	FALSE	TRUE	0.179 | 1.0	0.01 | 1.0	0.014 | 1.0	0.047 | 1.0	0.005 | 1.0	0.014 | 1.0	0.037 | 1.0	0.048 | 1.0	0.006 | 1.0	0.015 | 1.0	0.038 | 1.0	0.19 | 1.0	0.021 | 1.0	0.025 | 1.0	0.051 | 1.0	0.009 | 1.0	0.018 | 1.0	0.041 | 1.0	0.19 | 1.0	0.021 | 1.0	0.025 | 1.0	0.048 | 1.0	0.006 | 1.0	0.015 | 1.0	0.038 | 1.0
a1b1 complex_COL13A1	CPI-CS038A144AF	complex:a1b1 complex	simple:Q5TAT6		ENSG00000197467	curated	FALSE	TRUE	0.228 | 1.0	0.059 | 1.0	0.063 | 1.0	0.048 | 1.0	0.006 | 1.0	0.015 | 1.0	0.038 | 1.0	0.046 | 1.0	0.005 | 1.0	0.014 | 1.0	0.037 | 1.0	0.181 | 1.0	0.012 | 1.0	0.017 | 1.0	0.062 | 1.0	0.02 | 1.0	0.029 | 1.0	0.052 | 1.0	0.192 | 1.0	0.023 | 1.0	0.027 | 1.0	0.051 | 1.0	0.009 | 1.0	0.018 | 1.0	0.041 | 1.0
a2b1 complex_COL27A1	CPI-CS061359F65	complex:a2b1 complex	simple:Q8IZC6		ENSG00000196739	curated	TRUE	TRUE	0.004 | 1.0	0.0 | 1.0	0.006 | 1.0	0.003 | 1.0	0.004 | 1.0	0.0 | 1.0	0.003 | 1.0	0.003 | 1.0	0.005 | 1.0	0.0 | 1.0	0.003 | 1.0	0.008 | 1.0	0.0 | 1.0	0.01 | 1.0	0.003 | 1.0	0.004 | 1.0	0.0 | 1.0	0.002 | 1.0	0.0 | 1.0	0.0 | 1.0	0.0 | 1.0	0.002 | 1.0	0.003 | 1.0	0.0 | 1.0	0.002 | 1.0
a10b1 complex_COL27A1	CPI-CS08E5A7846	complex:a10b1 complex	simple:Q8IZC6		ENSG00000196739	curated	TRUE	TRUE	0.008 | 1.0	0.0 | 1.0	0.01 | 1.0	0.005 | 1.0	0.006 | 1.0	0.0 | 1.0	0.005 | 1.0	0.006 | 1.0	0.007 | 1.0	0.0 | 1.0	0.005 | 1.0	0.006 | 1.0	0.0 | 1.0	0.008 | 1.0	0.01 | 1.0	0.011 | 1.0	0.0 | 1.0	0.009 | 1.0	0.004 | 1.0	0.0 | 1.0	0.006 | 1.0	0.003 | 1.0	0.005 | 1.0	0.0 | 1.0	0.003 | 1.0
a11b1 complex_COL27A1	CPI-CS0F72157E2	complex:a11b1 complex	simple:Q8IZC6		ENSG00000196739	curated	TRUE	TRUE	0.004 | 1.0	0.0 | 1.0	0.006 | 1.0	0.003 | 1.0	0.004 | 1.0	0.0 | 1.0	0.003 | 1.0	0.004 | 1.0	0.005 | 1.0	0.0 | 1.0	0.004 | 1.0	0.015 | 1.0	0.0 | 1.0	0.017 | 1.0	0.007 | 1.0	0.008 | 1.0	0.0 | 1.0	0.007 | 1.0	0.015 | 1.0	0.0 | 1.0	0.017 | 1.0	0.004 | 1.0	0.005 | 1.0	0.0 | 1.0	0.003 | 1.0
a1b1 complex_COL27A1	CPI-CS02FA5CFBE	complex:a1b1 complex	simple:Q8IZC6		ENSG00000196739	curated	TRUE	TRUE	0.053 | 1.0	0.0 | 1.0	0.055 | 1.0	0.004 | 1.0	0.005 | 1.0	0.0 | 1.0	0.004 | 1.0	0.003 | 1.0	0.004 | 1.0	0.0 | 1.0	0.002 | 1.0	0.006 | 1.0	0.0 | 1.0	0.008 | 1.0	0.018 | 1.0	0.02 | 1.0	0.0 | 1.0	0.018 | 1.0	0.017 | 1.0	0.0 | 1.0	0.019 | 1.0	0.007 | 1.0	0.008 | 1.0	0.0 | 1.0	0.006 | 1.0
a2b1 complex_COL26A1	CPI-CS018BDAD0D	complex:a2b1 complex	simple:Q96A83		ENSG00000160963	curated	TRUE	TRUE	0.222 | 1.0	0.01 | 1.0	0.141 | 1.0	0.445 | 1.0	0.047 | 1.0	0.171 | 1.0	0.415 | 1.0	0.445 | 1.0	0.047 | 1.0	0.172 | 1.0	0.415 | 1.0	0.226 | 1.0	0.015 | 1.0	0.145 | 1.0	0.444 | 1.0	0.046 | 1.0	0.171 | 1.0	0.415 | 1.0	0.0 | 1.0	0.0 | 1.0	0.0 | 1.0	0.444 | 1.0	0.046 | 1.0	0.17 | 1.0	0.414 | 1.0
a10b1 complex_COL26A1	CPI-CS0DB33AA7A	complex:a10b1 complex	simple:Q96A83		ENSG00000160963	curated	TRUE	TRUE	0.226 | 1.0	0.014 | 1.0	0.144 | 1.0	0.447 | 1.0	0.049 | 1.0	0.173 | 1.0	0.417 | 1.0	0.447 | 1.0	0.049 | 1.0	0.174 | 1.0	0.418 | 1.0	0.224 | 1.0	0.012 | 1.0	0.143 | 1.0	0.452 | 1.0	0.054 | 1.0	0.178 | 1.0	0.422 | 1.0	0.222 | 1.0	0.01 | 1.0	0.141 | 1.0	0.445 | 1.0	0.047 | 1.0	0.172 | 1.0	0.415 | 1.0
a11b1 complex_COL26A1	CPI-CS0C971AE24	complex:a11b1 complex	simple:Q96A83		ENSG00000160963	curated	TRUE	TRUE	0.222 | 1.0	0.01 | 1.0	0.14 | 1.0	0.445 | 1.0	0.047 | 1.0	0.171 | 1.0	0.415 | 1.0	0.446 | 1.0	0.048 | 1.0	0.172 | 1.0	0.416 | 1.0	0.233 | 1.0	0.021 | 1.0	0.151 | 1.0	0.449 | 1.0	0.051 | 1.0	0.175 | 1.0	0.419 | 1.0	0.233 | 1.0	0.021 | 1.0	0.151 | 1.0	0.446 | 1.0	0.048 | 1.0	0.172 | 1.0	0.416 | 1.0
a1b1 complex_COL26A1	CPI-CS055068ECD	complex:a1b1 complex	simple:Q96A83		ENSG00000160963	curated	TRUE	TRUE	0.271 | 1.0	0.059 | 1.0	0.189 | 1.0	0.446 | 1.0	0.048 | 1.0	0.172 | 1.0	0.416 | 1.0	0.444 | 1.0	0.046 | 1.0	0.171 | 1.0	0.415 | 1.0	0.224 | 1.0	0.012 | 1.0	0.143 | 1.0	0.46 | 1.0	0.062 | 1.0	0.187 | 1.0	0.43 | 1.0	0.235 | 1.0	0.023 | 1.0	0.153 | 1.0	0.449 | 1.0	0.051 | 1.0	0.175 | 1.0	0.419 | 1.0
a2b1 complex_COL12A1	CPI-CS04ED33310	complex:a2b1 complex	simple:Q99715		ENSG00000111799	curated	TRUE	TRUE	0.079 | 1.0	0.021 | 1.0	0.364 | 1.0	0.153 | 1.0	0.024 | 1.0	0.293 | 1.0	0.152 | 1.0	0.153 | 1.0	0.024 | 1.0	0.293 | 1.0	0.152 | 1.0	0.083 | 1.0	0.025 | 1.0	0.368 | 1.0	0.152 | 1.0	0.024 | 1.0	0.293 | 1.0	0.152 | 1.0	0.0 | 1.0	0.0 | 1.0	0.0 | 1.0	0.152 | 1.0	0.023 | 1.0	0.292 | 1.0	0.151 | 1.0
a10b1 complex_COL12A1	CPI-CS0A67D0042	complex:a10b1 complex	simple:Q99715		ENSG00000111799	curated	TRUE	TRUE	0.082 | 1.0	0.024 | 1.0	0.368 | 1.0	0.155 | 1.0	0.026 | 1.0	0.295 | 1.0	0.154 | 1.0	0.155 | 1.0	0.027 | 1.0	0.296 | 1.0	0.155 | 1.0	0.081 | 1.0	0.023 | 1.0	0.366 | 1.0	0.159 | 1.0	0.031 | 1.0	0.3 | 1.0	0.159 | 1.0	0.079 | 1.0	0.021 | 1.0	0.364 | 1.0	0.153 | 1.0	0.024 | 1.0	0.293 | 1.0	0.152 | 1.0
a11b1 complex_COL12A1	CPI-CS04627807C	complex:a11b1 complex	simple:Q99715		ENSG00000111799	curated	TRUE	TRUE	0.078 | 1.0	0.02 | 1.0	0.364 | 1.0	0.153 | 1.0	0.024 | 1.0	0.293 | 1.0	0.152 | 1.0	0.154 | 1.0	0.025 | 1.0	0.294 | 1.0	0.153 | 1.0	0.089 | 1.0	0.031 | 1.0	0.375 | 1.0	0.156 | 1.0	0.028 | 1.0	0.297 | 1.0	0.156 | 1.0	0.089 | 1.0	0.031 | 1.0	0.375 | 1.0	0.153 | 1.0	0.025 | 1.0	0.294 | 1.0	0.153 | 1.0
a1b1 complex_COL12A1	CPI-CS0390FB629	complex:a1b1 complex	simple:Q99715		ENSG00000111799	curated	TRUE	TRUE	0.127 | 1.0	0.069 | 1.0	0.413 | 1.0	0.154 | 1.0	0.025 | 1.0	0.294 | 1.0	0.153 | 1.0	0.152 | 1.0	0.024 | 1.0	0.293 | 1.0	0.152 | 1.0	0.081 | 1.0	0.023 | 1.0	0.366 | 1.0	0.168 | 1.0	0.039 | 1.0	0.308 | 1.0	0.167 | 1.0	0.091 | 1.0	0.033 | 1.0	0.377 | 1.0	0.156 | 1.0	0.028 | 1.0	0.297 | 1.0	0.156 | 1.0
a3b1 complex_CSPG4	CPI-CS0EA96A64E	complex:a3b1 complex	simple:Q6UVK1		ENSG00000173546	curated	FALSE	TRUE	0.015 | 1.0	0.0 | 1.0	0.011 | 1.0	0.022 | 1.0	0.012 | 1.0	0.018 | 1.0	0.019 | 1.0	0.078 | 1.0	0.068 | 1.0	0.075 | 1.0	0.075 | 1.0	0.075 | 1.0	0.0 | 1.0	0.071 | 1.0	0.023 | 1.0	0.013 | 1.0	0.019 | 1.0	0.02 | 1.0	0.0 | 1.0	0.0 | 1.0	0.0 | 1.0	0.02 | 1.0	0.009 | 1.0	0.016 | 1.0	0.016 | 1.0
a3b1 complex_LAMA3	CPI-CS023C72D92	complex:a3b1 complex	simple:Q16787		ENSG00000053747	curated	TRUE	TRUE	0.007 | 1.0	0.031 | 1.0	0.004 | 1.0	0.008 | 1.0	0.041 | 1.0	0.006 | 1.0	0.006 | 1.0	0.064 | 1.0	0.097 | 1.0	0.062 | 1.0	0.062 | 1.0	0.067 | 1.0	0.091 | 1.0	0.064 | 1.0	0.009 | 1.0	0.042 | 1.0	0.007 | 1.0	0.007 | 1.0	0.0 | 1.0	0.0 | 1.0	0.0 | 1.0	0.006 | 1.0	0.039 | 1.0	0.004 | 1.0	0.003 | 1.0
a4b1 complex_PLA2G2A	CPI-CS0A6ABD92A	complex:a4b1 complex	simple:P14555		ENSG00000188257	curated	TRUE	TRUE	0.006 | 1.0	0.008 | 1.0	0.009 | 1.0	0.002 | 1.0	0.003 | 1.0	0.003 | 1.0	0.003 | 1.0	0.001 | 1.0	0.002 | 1.0	0.002 | 1.0	0.002 | 1.0	0.0 | 1.0	0.0 | 1.0	0.0 | 1.0	0.002 | 1.0	0.002 | 1.0	0.003 | 1.0	0.002 | 1.0	0.003 | 1.0	0.005 | 1.0	0.005 | 1.0	0.002 | 1.0	0.002 | 1.0	0.003 | 1.0	0.002 | 1.0
a5b1 complex_PLA2G2A	CPI-CS0E7DD78FA	complex:a5b1 complex	simple:P14555		ENSG00000188257	curated	TRUE	TRUE	0.026 | 1.0	0.029 | 1.0	0.029 | 1.0	0.022 | 1.0	0.023 | 1.0	0.023 | 1.0	0.023 | 1.0	0.004 | 1.0	0.004 | 1.0	0.004 | 1.0	0.004 | 1.0	0.012 | 1.0	0.015 | 1.0	0.015 | 1.0	0.024 | 1.0	0.024 | 1.0	0.025 | 1.0	0.024 | 1.0	0.026 | 1.0	0.028 | 1.0	0.028 | 1.0	0.014 | 1.0	0.014 | 1.0	0.015 | 1.0	0.014 | 1.0
a5b1 complex_FBN1	CPI-CS079D7F0BA	complex:a5b1 complex	simple:P35555		ENSG00000166147	curated	TRUE	TRUE	0.349 | 1.0	0.043 | 1.0	1.399 | 1.0	0.454 | 1.0	0.083 | 1.0	0.948 | 1.0	0.563 | 1.0	0.435 | 1.0	0.064 | 1.0	0.929 | 1.0	0.545 | 1.0	0.335 | 1.0	0.029 | 1.0	1.385 | 1.0	0.456 | 1.0	0.085 | 1.0	0.95 | 1.0	0.565 | 1.0	0.348 | 1.0	0.043 | 1.0	1.399 | 1.0	0.445 | 1.0	0.074 | 1.0	0.939 | 1.0	0.555 | 1.0
aMb2 complex_C3	CPI-CS0B5B14DA5	complex:aMb2 complex	simple:P01024		ENSG00000125730	curated	TRUE	TRUE	0.004 | 1.0	0.058 | 1.0	0.003 | 1.0	0.003 | 1.0	0.03 | 1.0	0.006 | 1.0	0.007 | 1.0	0.002 | 1.0	0.028 | 1.0	0.004 | 1.0	0.005 | 1.0	0.004 | 1.0	0.058 | 1.0	0.003 | 1.0	0.002 | 1.0	0.028 | 1.0	0.004 | 1.0	0.005 | 1.0	0.004 | 1.0	0.058 | 1.0	0.003 | 1.0	0.002 | 1.0	0.029 | 1.0	0.005 | 1.0	0.006 | 1.0
aMb2 complex_F10	CPI-CS0CE4725B0	complex:aMb2 complex	simple:P00742		ENSG00000126218	curated	TRUE	TRUE	0.0 | 1.0	0.004 | 1.0	0.004 | 1.0	0.003 | 1.0	0.004 | 1.0	0.0 | 1.0	0.0 | 1.0	0.001 | 1.0	0.002 | 1.0	0.0 | 1.0	0.0 | 1.0	0.0 | 1.0	0.004 | 1.0	0.004 | 1.0	0.001 | 1.0	0.002 | 1.0	0.0 | 1.0	0.0 | 1.0	0.0 | 1.0	0.004 | 1.0	0.004 | 1.0	0.002 | 1.0	0.003 | 1.0	0.0 | 1.0	0.0 | 1.0
aMb2 complex_ICAM1	CPI-CS0B5B4F3A4	complex:aMb2 complex	simple:P05362		ENSG00000090339	curated	FALSE	TRUE	0.016 | 1.0	0.035 | 1.0	0.079 | 1.0	0.039 | 1.0	0.026 | 1.0	0.154 | 1.0	0.061 | 1.0	0.038 | 1.0	0.024 | 1.0	0.152 | 1.0	0.059 | 1.0	0.016 | 1.0	0.035 | 1.0	0.079 | 1.0	0.038 | 1.0	0.024 | 1.0	0.152 | 1.0	0.059 | 1.0	0.016 | 1.0	0.035 | 1.0	0.079 | 1.0	0.038 | 1.0	0.025 | 1.0	0.153 | 1.0	0.06 | 1.0
aLb2 complex_ICAM1	CPI-CS0138B5457	complex:aLb2 complex	simple:P05362		ENSG00000090339	curated	FALSE	TRUE	0.015 | 1.0	0.034 | 1.0	0.078 | 1.0	0.037 | 1.0	0.024 | 1.0	0.152 | 1.0	0.059 | 1.0	0.038 | 1.0	0.024 | 1.0	0.152 | 1.0	0.059 | 1.0	0.0 | 1.0	0.0 | 1.0	0.0 | 1.0	0.0 | 1.0	0.0 | 1.0	0.0 | 1.0	0.0 | 1.0	0.0 | 1.0	0.0 | 1.0	0.0 | 1.0	0.037 | 1.0	0.024 | 1.0	0.152 | 1.0	0.059 | 1.0
aVb6 complex_TGFB1	CPI-CS0BD61C784	complex:aVb6 complex	simple:P01137		ENSG00000105329	curated	TRUE	TRUE	0.008 | 1.0	0.0 | 1.0	0.004 | 1.0	0.005 | 1.0	0.005 | 1.0	0.0 | 1.0	0.005 | 1.0	0.0 | 1.0	0.0 | 1.0	0.0 | 1.0	0.0 | 1.0	0.009 | 1.0	0.0 | 1.0	0.004 | 1.0	0.003 | 1.0	0.003 | 1.0	0.0 | 1.0	0.003 | 1.0	0.008 | 1.0	0.0 | 1.0	0.003 | 1.0	0.002 | 1.0	0.003 | 1.0	0.0 | 1.0	0.003 | 1.0
TGFbeta receptor1_TGFB1	CPI-CS0DE2F54C9	complex:TGFbeta receptor1	simple:P01137		ENSG00000105329	curated	TRUE	FALSE	0.008 | 1.0	0.0 | 1.0	0.004 | 1.0	0.004 | 1.0	0.004 | 1.0	0.0 | 1.0	0.004 | 1.0	0.004 | 1.0	0.004 | 1.0	0.0 | 1.0	0.004 | 1.0	0.009 | 1.0	0.0 | 1.0	0.004 | 1.0	0.003 | 1.0	0.003 | 1.0	0.0 | 1.0	0.003 | 1.0	0.009 | 1.0	0.0 | 1.0	0.004 | 1.0	0.001 | 1.0	0.002 | 1.0	0.0 | 1.0	0.002 | 1.0
TGFbeta receptor2_TGFB1	CPI-CS03F4848C8	complex:TGFbeta receptor2	simple:P01137		ENSG00000105329	curated	TRUE	FALSE	0.008 | 1.0	0.0 | 1.0	0.004 | 1.0	0.004 | 1.0	0.004 | 1.0	0.0 | 1.0	0.004 | 1.0	0.004 | 1.0	0.004 | 1.0	0.0 | 1.0	0.004 | 1.0	0.009 | 1.0	0.0 | 1.0	0.004 | 1.0	0.003 | 1.0	0.003 | 1.0	0.0 | 1.0	0.003 | 1.0	0.009 | 1.0	0.0 | 1.0	0.004 | 1.0	0.001 | 1.0	0.002 | 1.0	0.0 | 1.0	0.002 | 1.0
TGFbeta receptor1_TGFB2	CPI-CS03E874E60	complex:TGFbeta receptor1	simple:P61812		ENSG00000092969	curated	TRUE	FALSE	0.051 | 1.0	0.012 | 1.0	0.089 | 1.0	0.041 | 1.0	0.045 | 1.0	0.065 | 1.0	0.064 | 1.0	0.04 | 1.0	0.044 | 1.0	0.064 | 1.0	0.063 | 1.0	0.051 | 1.0	0.012 | 1.0	0.09 | 1.0	0.039 | 1.0	0.043 | 1.0	0.063 | 1.0	0.062 | 1.0	0.051 | 1.0	0.012 | 1.0	0.09 | 1.0	0.038 | 1.0	0.042 | 1.0	0.062 | 1.0	0.061 | 1.0
TGFbeta receptor2_TGFB2	CPI-CS00FDC6314	complex:TGFbeta receptor2	simple:P61812		ENSG00000092969	curated	TRUE	FALSE	0.051 | 1.0	0.012 | 1.0	0.089 | 1.0	0.041 | 1.0	0.045 | 1.0	0.065 | 1.0	0.064 | 1.0	0.04 | 1.0	0.044 | 1.0	0.064 | 1.0	0.063 | 1.0	0.051 | 1.0	0.012 | 1.0	0.09 | 1.0	0.039 | 1.0	0.043 | 1.0	0.063 | 1.0	0.062 | 1.0	0.051 | 1.0	0.012 | 1.0	0.09 | 1.0	0.038 | 1.0	0.042 | 1.0	0.062 | 1.0	0.061 | 1.0
TGFbeta receptor1_TGFB3	CPI-CS0B0BBB2BB	complex:TGFbeta receptor1	simple:P10600		ENSG00000119699	curated	TRUE	FALSE	0.015 | 1.0	0.018 | 1.0	0.043 | 1.0	0.021 | 1.0	0.027 | 1.0	0.042 | 1.0	0.036 | 1.0	0.02 | 1.0	0.027 | 1.0	0.042 | 1.0	0.035 | 1.0	0.016 | 1.0	0.019 | 1.0	0.044 | 1.0	0.019 | 1.0	0.026 | 1.0	0.041 | 1.0	0.034 | 1.0	0.016 | 1.0	0.019 | 1.0	0.044 | 1.0	0.018 | 1.0	0.024 | 1.0	0.039 | 1.0	0.033 | 1.0
TGFbeta receptor2_TGFB3	CPI-CS0B61BEA96	complex:TGFbeta receptor2	simple:P10600		ENSG00000119699	curated	TRUE	FALSE	0.015 | 1.0	0.018 | 1.0	0.043 | 1.0	0.021 | 1.0	0.027 | 1.0	0.042 | 1.0	0.036 | 1.0	0.02 | 1.0	0.027 | 1.0	0.042 | 1.0	0.035 | 1.0	0.016 | 1.0	0.019 | 1.0	0.044 | 1.0	0.019 | 1.0	0.026 | 1.0	0.041 | 1.0	0.034 | 1.0	0.016 | 1.0	0.019 | 1.0	0.044 | 1.0	0.018 | 1.0	0.024 | 1.0	0.039 | 1.0	0.033 | 1.0
FLT1 complex_VEGFA	CPI-CS067298D94	complex:FLT1 complex	simple:P15692		ENSG00000112715	curated	TRUE	FALSE	0.36 | 1.0	0.087 | 1.0	0.165 | 1.0	0.421 | 1.0	0.114 | 1.0	0.221 | 1.0	0.382 | 1.0	0.426 | 1.0	0.119 | 1.0	0.225 | 1.0	0.387 | 1.0	0.364 | 1.0	0.091 | 1.0	0.169 | 1.0	0.422 | 1.0	0.115 | 1.0	0.222 | 1.0	0.383 | 1.0	0.359 | 1.0	0.086 | 1.0	0.164 | 1.0	0.419 | 1.0	0.112 | 1.0	0.219 | 1.0	0.38 | 1.0
FLT1 complex_PGF	CPI-CS073D36B1D	complex:FLT1 complex	simple:P49763		ENSG00000119630	curated	TRUE	FALSE	0.01 | 1.0	0.0 | 1.0	0.012 | 1.0	0.009 | 1.0	0.006 | 1.0	0.019 | 1.0	0.018 | 1.0	0.013 | 1.0	0.011 | 1.0	0.023 | 1.0	0.023 | 1.0	0.014 | 1.0	0.0 | 1.0	0.016 | 1.0	0.01 | 1.0	0.007 | 1.0	0.02 | 1.0	0.019 | 1.0	0.009 | 1.0	0.0 | 1.0	0.01 | 1.0	0.007 | 1.0	0.004 | 1.0	0.017 | 1.0	0.016 | 1.0
FLT1 complex_VEGFB	CPI-CS077F1340A	complex:FLT1 complex	simple:P49765		ENSG00000173511	curated	TRUE	FALSE	0.081 | 1.0	0.037 | 1.0	0.04 | 1.0	0.066 | 1.0	0.042 | 1.0	0.05 | 1.0	0.053 | 1.0	0.071 | 1.0	0.046 | 1.0	0.054 | 1.0	0.057 | 1.0	0.085 | 1.0	0.041 | 1.0	0.044 | 1.0	0.067 | 1.0	0.043 | 1.0	0.051 | 1.0	0.054 | 1.0	0.08 | 1.0	0.036 | 1.0	0.039 | 1.0	0.064 | 1.0	0.04 | 1.0	0.048 | 1.0	0.051 | 1.0
IL10 receptor_IL10	CPI-CS04CBDE052	complex:IL10 receptor	simple:P22301		ENSG00000136634	curated	TRUE	FALSE	0.001 | 1.0	0.003 | 1.0	0.002 | 1.0	0.0 | 1.0	0.0 | 1.0	0.001 | 1.0	0.0 | 1.0	0.0 | 1.0	0.0 | 1.0	0.001 | 1.0	0.0 | 1.0	0.0 | 1.0	0.0 | 1.0	0.0 | 1.0	0.0 | 1.0	0.0 | 1.0	0.0 | 1.0	0.0 | 1.0	0.0 | 1.0	0.0 | 1.0	0.0 | 1.0	0.0 | 1.0	0.0 | 1.0	0.001 | 1.0	0.0 | 1.0
IL2 receptor_I_IL2	CPI-CS0A34112A6	complex:IL2 receptor_I	simple:P60568		ENSG00000109471	curated	TRUE	FALSE	0.0 | 1.0	0.003 | 1.0	0.002 | 1.0	0.0 | 1.0	0.0 | 1.0	0.0 | 1.0	0.002 | 1.0	0.0 | 1.0	0.0 | 1.0	0.0 | 1.0	0.002 | 1.0	0.0 | 1.0	0.004 | 1.0	0.003 | 1.0	0.0 | 1.0	0.0 | 1.0	0.0 | 1.0	0.003 | 1.0	0.0 | 1.0	0.003 | 1.0	0.002 | 1.0	0.0 | 1.0	0.0 | 1.0	0.0 | 1.0	0.001 | 1.0
CD40LG_a5b1 complex	CPI-SC0C8B4C056	simple:P29965	complex:a5b1 complex	ENSG00000102245		curated	TRUE	TRUE	0.026 | 1.0	0.012 | 1.0	0.026 | 1.0	0.025 | 1.0	0.006 | 1.0	0.027 | 1.0	0.017 | 1.0	0.024 | 1.0	0.005 | 1.0	0.026 | 1.0	0.016 | 1.0	0.027 | 1.0	0.012 | 1.0	0.026 | 1.0	0.025 | 1.0	0.006 | 1.0	0.027 | 1.0	0.016 | 1.0	0.026 | 1.0	0.011 | 1.0	0.025 | 1.0	0.023 | 1.0	0.004 | 1.0	0.024 | 1.0	0.014 | 1.0
L1CAM_a5b1 complex	CPI-SC0592EC3D0	simple:P32004	complex:a5b1 complex	ENSG00000198910		curated	FALSE	TRUE	0.026 | 1.0	0.012 | 1.0	0.026 | 1.0	0.023 | 1.0	0.004 | 1.0	0.025 | 1.0	0.014 | 1.0	0.061 | 1.0	0.042 | 1.0	0.062 | 1.0	0.052 | 1.0	0.078 | 1.0	0.064 | 1.0	0.078 | 1.0	0.026 | 1.0	0.007 | 1.0	0.028 | 1.0	0.018 | 1.0	0.027 | 1.0	0.012 | 1.0	0.026 | 1.0	0.024 | 1.0	0.005 | 1.0	0.026 | 1.0	0.015 | 1.0
JAM2_a4b1 complex	CPI-SC070D5A96F	simple:P57087	complex:a4b1 complex	ENSG00000154721		curated	FALSE	TRUE	0.01 | 1.0	0.0 | 1.0	0.007 | 1.0	0.024 | 1.0	0.023 | 1.0	0.024 | 1.0	0.024 | 1.0	0.003 | 1.0	0.002 | 1.0	0.002 | 1.0	0.002 | 1.0	0.011 | 1.0	0.0 | 1.0	0.007 | 1.0	0.015 | 1.0	0.014 | 1.0	0.014 | 1.0	0.014 | 1.0	0.03 | 1.0	0.0 | 1.0	0.027 | 1.0	0.032 | 1.0	0.031 | 1.0	0.032 | 1.0	0.032 | 1.0
PLAUR_a4b1 complex	CPI-SC0E9C058EB	simple:Q03405	complex:a4b1 complex	ENSG00000011422		curated	TRUE	TRUE	0.008 | 1.0	0.0 | 1.0	0.004 | 1.0	0.0 | 1.0	0.0 | 1.0	0.0 | 1.0	0.0 | 1.0	0.003 | 1.0	0.002 | 1.0	0.002 | 1.0	0.002 | 1.0	0.0 | 1.0	0.0 | 1.0	0.0 | 1.0	0.005 | 1.0	0.004 | 1.0	0.004 | 1.0	0.004 | 1.0	0.009 | 1.0	0.0 | 1.0	0.005 | 1.0	0.0 | 1.0	0.0 | 1.0	0.0 | 1.0	0.0 | 1.0
VCAM1_a4b1 complex	CPI-SC0A9EB628A	simple:P19320	complex:a4b1 complex	ENSG00000162692		curated	FALSE	TRUE	0.012 | 1.0	0.0 | 1.0	0.009 | 1.0	0.007 | 1.0	0.006 | 1.0	0.007 | 1.0	0.007 | 1.0	0.031 | 1.0	0.03 | 1.0	0.03 | 1.0	0.03 | 1.0	0.071 | 1.0	0.0 | 1.0	0.067 | 1.0	0.069 | 1.0	0.068 | 1.0	0.069 | 1.0	0.069 | 1.0	0.081 | 1.0	0.0 | 1.0	0.077 | 1.0	0.003 | 1.0	0.002 | 1.0	0.003 | 1.0	0.003 | 1.0
aLb2 complex_ICAM4	CPI-CS019270B32	complex:aLb2 complex	simple:Q14773		ENSG00000105371	curated	TRUE	TRUE	0.0 | 1.0	0.0 | 1.0	0.0 | 1.0	0.0 | 1.0	0.0 | 1.0	0.002 | 1.0	0.001 | 1.0	0.0 | 1.0	0.0 | 1.0	0.002 | 1.0	0.001 | 1.0	0.0 | 1.0	0.0 | 1.0	0.0 | 1.0	0.0 | 1.0	0.0 | 1.0	0.0 | 1.0	0.0 | 1.0	0.0 | 1.0	0.0 | 1.0	0.0 | 1.0	0.0 | 1.0	0.0 | 1.0	0.002 | 1.0	0.001 | 1.0
aLb2 complex_ICAM2	CPI-CS0A31FD6A7	complex:aLb2 complex	simple:P13598		ENSG00000108622	curated	FALSE	TRUE	0.005 | 1.0	0.003 | 1.0	0.002 | 1.0	0.007 | 1.0	0.001 | 1.0	0.0 | 1.0	0.002 | 1.0	0.008 | 1.0	0.002 | 1.0	0.0 | 1.0	0.002 | 1.0	0.0 | 1.0	0.0 | 1.0	0.0 | 1.0	0.0 | 1.0	0.0 | 1.0	0.0 | 1.0	0.0 | 1.0	0.0 | 1.0	0.0 | 1.0	0.0 | 1.0	0.007 | 1.0	0.001 | 1.0	0.0 | 1.0	0.002 | 1.0
aLb2 complex_F11R	CPI-CS0FD625DFF	complex:aLb2 complex	simple:Q9Y624		ENSG00000158769	curated	FALSE	TRUE	0.015 | 1.0	0.129 | 1.0	0.007 | 1.0	0.007 | 1.0	0.181 | 1.0	0.007 | 1.0	0.007 | 1.0	0.007 | 1.0	0.181 | 1.0	0.007 | 1.0	0.008 | 1.0	0.0 | 1.0	0.0 | 1.0	0.0 | 1.0	0.0 | 1.0	0.0 | 1.0	0.0 | 1.0	0.0 | 1.0	0.0 | 1.0	0.0 | 1.0	0.0 | 1.0	0.006 | 1.0	0.181 | 1.0	0.007 | 1.0	0.007 | 1.0
LIFR_OSM	CPI-CS0E661878B	complex:LIFR	simple:P13725		ENSG00000099985	curated	TRUE	FALSE	0.01 | 1.0	0.007 | 1.0	0.015 | 1.0	0.005 | 1.0	0.005 | 1.0	0.005 | 1.0	0.006 | 1.0	0.008 | 1.0	0.008 | 1.0	0.008 | 1.0	0.008 | 1.0	0.009 | 1.0	0.006 | 1.0	0.015 | 1.0	0.008 | 1.0	0.009 | 1.0	0.009 | 1.0	0.009 | 1.0	0.009 | 1.0	0.006 | 1.0	0.015 | 1.0	0.006 | 1.0	0.006 | 1.0	0.006 | 1.0	0.006 | 1.0
OSMR_OSM	CPI-CS06D50EBF8	complex:OSMR	simple:P13725		ENSG00000099985	curated	TRUE	FALSE	0.008 | 1.0	0.005 | 1.0	0.013 | 1.0	0.005 | 1.0	0.005 | 1.0	0.005 | 1.0	0.005 | 1.0	0.007 | 1.0	0.008 | 1.0	0.007 | 1.0	0.008 | 1.0	0.013 | 1.0	0.01 | 1.0	0.019 | 1.0	0.0 | 1.0	0.0 | 1.0	0.0 | 1.0	0.0 | 1.0	0.01 | 1.0	0.007 | 1.0	0.016 | 1.0	0.005 | 1.0	0.006 | 1.0	0.005 | 1.0	0.006 | 1.0
LIFR_LIF	CPI-CS07B61574B	complex:LIFR	simple:P15018		ENSG00000128342	curated	TRUE	FALSE	0.007 | 1.0	0.005 | 1.0	0.006 | 1.0	0.006 | 1.0	0.002 | 1.0	0.004 | 1.0	0.003 | 1.0	0.009 | 1.0	0.005 | 1.0	0.007 | 1.0	0.006 | 1.0	0.006 | 1.0	0.004 | 1.0	0.005 | 1.0	0.009 | 1.0	0.006 | 1.0	0.007 | 1.0	0.007 | 1.0	0.006 | 1.0	0.004 | 1.0	0.005 | 1.0	0.007 | 1.0	0.003 | 1.0	0.004 | 1.0	0.004 | 1.0
IL15 receptor_IL15	CPI-CS06E556972	complex:IL15 receptor	simple:P40933		ENSG00000164136	curated	TRUE	FALSE	0.018 | 1.0	0.003 | 1.0	0.002 | 1.0	0.033 | 1.0	0.004 | 1.0	0.004 | 1.0	0.011 | 1.0	0.033 | 1.0	0.004 | 1.0	0.004 | 1.0	0.011 | 1.0	0.02 | 1.0	0.004 | 1.0	0.003 | 1.0	0.034 | 1.0	0.004 | 1.0	0.004 | 1.0	0.011 | 1.0	0.019 | 1.0	0.003 | 1.0	0.002 | 1.0	0.032 | 1.0	0.003 | 1.0	0.003 | 1.0	0.01 | 1.0
PDGFR complex_PDGFB	CPI-CS00C360E5A	complex:PDGFR complex	simple:P01127		ENSG00000100311	curated	TRUE	FALSE	0.178 | 1.0	0.194 | 1.0	0.178 | 1.0	0.498 | 1.0	0.509 | 1.0	0.499 | 1.0	0.498 | 1.0	0.039 | 1.0	0.049 | 1.0	0.039 | 1.0	0.039 | 1.0	0.013 | 1.0	0.029 | 1.0	0.013 | 1.0	0.269 | 1.0	0.28 | 1.0	0.27 | 1.0	0.269 | 1.0	0.207 | 1.0	0.223 | 1.0	0.208 | 1.0	0.227 | 1.0	0.238 | 1.0	0.228 | 1.0	0.227 | 1.0
IL6 receptor_IL6	CPI-CS063AE1C91	complex:IL6 receptor	simple:P05231		ENSG00000136244	curated	TRUE	FALSE	0.003 | 1.0	0.01 | 1.0	0.012 | 1.0	0.001 | 1.0	0.009 | 1.0	0.007 | 1.0	0.001 | 1.0	0.004 | 1.0	0.011 | 1.0	0.009 | 1.0	0.003 | 1.0	0.014 | 1.0	0.021 | 1.0	0.023 | 1.0	0.004 | 1.0	0.012 | 1.0	0.009 | 1.0	0.004 | 1.0	0.007 | 1.0	0.014 | 1.0	0.016 | 1.0	0.001 | 1.0	0.009 | 1.0	0.007 | 1.0	0.001 | 1.0
FCER2_aXb2 complex	CPI-SC03446A95E	simple:P06734	complex:aXb2 complex	ENSG00000104921		curated	TRUE	TRUE	0.0 | 1.0	0.0 | 1.0	0.0 | 1.0	0.0 | 1.0	0.0 | 1.0	0.0 | 1.0	0.0 | 1.0	0.003 | 1.0	0.002 | 1.0	0.001 | 1.0	0.002 | 1.0	0.0 | 1.0	0.0 | 1.0	0.0 | 1.0	0.0 | 1.0	0.0 | 1.0	0.0 | 1.0	0.0 | 1.0	0.002 | 1.0	0.003 | 1.0	0.002 | 1.0	0.0 | 1.0	0.0 | 1.0	0.0 | 1.0	0.0 | 1.0
THY1_aXb2 complex	CPI-SC0C6B54D7A	simple:P04216	complex:aXb2 complex	ENSG00000154096		curated	FALSE	TRUE	0.045 | 1.0	0.047 | 1.0	0.046 | 1.0	0.06 | 1.0	0.059 | 1.0	0.058 | 1.0	0.058 | 1.0	0.005 | 1.0	0.005 | 1.0	0.004 | 1.0	0.004 | 1.0	0.0 | 1.0	0.0 | 1.0	0.0 | 1.0	0.01 | 1.0	0.009 | 1.0	0.008 | 1.0	0.008 | 1.0	0.005 | 1.0	0.006 | 1.0	0.005 | 1.0	0.012 | 1.0	0.011 | 1.0	0.01 | 1.0	0.011 | 1.0
ICAM1_aXb2 complex	CPI-SC0A9458008	simple:P05362	complex:aXb2 complex	ENSG00000090339		curated	FALSE	TRUE	0.015 | 1.0	0.016 | 1.0	0.015 | 1.0	0.039 | 1.0	0.038 | 1.0	0.038 | 1.0	0.038 | 1.0	0.026 | 1.0	0.025 | 1.0	0.024 | 1.0	0.025 | 1.0	0.034 | 1.0	0.035 | 1.0	0.034 | 1.0	0.154 | 1.0	0.153 | 1.0	0.152 | 1.0	0.153 | 1.0	0.078 | 1.0	0.079 | 1.0	0.078 | 1.0	0.061 | 1.0	0.06 | 1.0	0.059 | 1.0	0.059 | 1.0
FCER2_aMb2 complex	CPI-SC07312BD5C	simple:P06734	complex:aMb2 complex	ENSG00000104921		curated	TRUE	TRUE	0.0 | 1.0	0.0 | 1.0	0.0 | 1.0	0.0 | 1.0	0.0 | 1.0	0.0 | 1.0	0.0 | 1.0	0.003 | 1.0	0.002 | 1.0	0.001 | 1.0	0.002 | 1.0	0.0 | 1.0	0.0 | 1.0	0.0 | 1.0	0.0 | 1.0	0.0 | 1.0	0.0 | 1.0	0.0 | 1.0	0.003 | 1.0	0.003 | 1.0	0.003 | 1.0	0.0 | 1.0	0.0 | 1.0	0.0 | 1.0	0.0 | 1.0
THY1_aMb2 complex	CPI-SC0A05D3880	simple:P04216	complex:aMb2 complex	ENSG00000154096		curated	FALSE	TRUE	0.047 | 1.0	0.047 | 1.0	0.047 | 1.0	0.06 | 1.0	0.058 | 1.0	0.058 | 1.0	0.059 | 1.0	0.005 | 1.0	0.004 | 1.0	0.004 | 1.0	0.005 | 1.0	0.0 | 1.0	0.0 | 1.0	0.0 | 1.0	0.01 | 1.0	0.008 | 1.0	0.008 | 1.0	0.009 | 1.0	0.006 | 1.0	0.006 | 1.0	0.006 | 1.0	0.012 | 1.0	0.01 | 1.0	0.01 | 1.0	0.011 | 1.0
JAM3_aMb2 complex	CPI-SC0F9DD28F3	simple:Q9BX67	complex:aMb2 complex	ENSG00000166086		curated	TRUE	TRUE	0.048 | 1.0	0.048 | 1.0	0.048 | 1.0	0.075 | 1.0	0.074 | 1.0	0.074 | 1.0	0.075 | 1.0	0.018 | 1.0	0.016 | 1.0	0.016 | 1.0	0.017 | 1.0	0.013 | 1.0	0.012 | 1.0	0.012 | 1.0	0.045 | 1.0	0.044 | 1.0	0.044 | 1.0	0.045 | 1.0	0.071 | 1.0	0.071 | 1.0	0.071 | 1.0	0.058 | 1.0	0.056 | 1.0	0.056 | 1.0	0.057 | 1.0
GP1BA_aMb2 complex	CPI-SC0B292AEE6	simple:P07359	complex:aMb2 complex	ENSG00000185245		curated	FALSE	TRUE	0.0 | 1.0	0.0 | 1.0	0.0 | 1.0	0.004 | 1.0	0.002 | 1.0	0.002 | 1.0	0.003 | 1.0	0.007 | 1.0	0.005 | 1.0	0.005 | 1.0	0.006 | 1.0	0.004 | 1.0	0.004 | 1.0	0.004 | 1.0	0.004 | 1.0	0.002 | 1.0	0.002 | 1.0	0.003 | 1.0	0.0 | 1.0	0.0 | 1.0	0.0 | 1.0	0.003 | 1.0	0.001 | 1.0	0.001 | 1.0	0.002 | 1.0
a6b4 complex_IGF1	CPI-CS0E781A324	complex:a6b4 complex	simple:P05019		ENSG00000017427	curated	TRUE	TRUE	0.149 | 1.0	0.053 | 1.0	0.417 | 1.0	0.132 | 1.0	0.053 | 1.0	0.456 | 1.0	0.166 | 1.0	0.21 | 0.491	0.131 | 1.0	0.534 | 0.0	0.244 | 0.004	0.246 | 0.016	0.149 | 1.0	0.513 | 0.0	0.13 | 1.0	0.051 | 1.0	0.455 | 1.0	0.165 | 1.0	0.138 | 1.0	0.042 | 1.0	0.405 | 1.0	0.13 | 1.0	0.051 | 1.0	0.455 | 1.0	0.165 | 1.0
PDGFR complex_PDGFD	CPI-CS0BAF97962	complex:PDGFR complex	simple:Q9GZP0		ENSG00000170962	curated	TRUE	FALSE	0.216 | 1.0	0.202 | 1.0	0.228 | 1.0	0.512 | 1.0	0.52 | 1.0	0.525 | 1.0	0.528 | 1.0	0.052 | 1.0	0.061 | 1.0	0.065 | 1.0	0.068 | 1.0	0.052 | 1.0	0.037 | 1.0	0.064 | 1.0	0.282 | 1.0	0.291 | 1.0	0.296 | 1.0	0.298 | 1.0	0.246 | 1.0	0.232 | 1.0	0.258 | 1.0	0.24 | 1.0	0.249 | 1.0	0.253 | 1.0	0.256 | 1.0
CDH1_a2b1 complex	CPI-SC0D9B795CC	simple:P12830	complex:a2b1 complex	ENSG00000039068		curated	FALSE	TRUE	0.019 | 1.0	0.023 | 1.0	0.0 | 1.0	0.03 | 1.0	0.03 | 1.0	0.03 | 1.0	0.029 | 1.0	1.144 | 1.0	1.144 | 1.0	1.143 | 1.0	1.143 | 1.0	1.149 | 1.0	1.154 | 1.0	0.0 | 1.0	0.017 | 1.0	0.017 | 1.0	0.016 | 1.0	0.016 | 1.0	0.02 | 1.0	0.024 | 1.0	0.0 | 1.0	0.019 | 1.0	0.019 | 1.0	0.018 | 1.0	0.018 | 1.0
IL20 receptor Type II_IL24	CPI-CS0CF47221A	complex:IL20 receptor Type II	simple:Q13007		ENSG00000162892	curated	TRUE	FALSE	0.0 | 1.0	0.02 | 1.0	0.002 | 1.0	0.0 | 1.0	0.0 | 1.0	0.0 | 1.0	0.0 | 1.0	0.0 | 1.0	0.0 | 1.0	0.0 | 1.0	0.0 | 1.0	0.0 | 1.0	0.0 | 1.0	0.0 | 1.0	0.002 | 1.0	0.015 | 1.0	0.002 | 1.0	0.003 | 1.0	0.0 | 1.0	0.0 | 1.0	0.0 | 1.0	0.001 | 1.0	0.014 | 1.0	0.001 | 1.0	0.002 | 1.0
IL20 receptor Type II_IL20	CPI-CS0E8ADC968	complex:IL20 receptor Type II	simple:Q9NYY1		ENSG00000162891	curated	TRUE	FALSE	0.003 | 1.0	0.0 | 1.0	0.004 | 1.0	0.0 | 1.0	0.0 | 1.0	0.0 | 1.0	0.0 | 1.0	0.0 | 1.0	0.0 | 1.0	0.0 | 1.0	0.0 | 1.0	0.0 | 1.0	0.0 | 1.0	0.0 | 1.0	0.002 | 1.0	0.002 | 1.0	0.003 | 1.0	0.002 | 1.0	0.0 | 1.0	0.0 | 1.0	0.0 | 1.0	0.001 | 1.0	0.001 | 1.0	0.002 | 1.0	0.001 | 1.0
GDF9_TGFR_BMPR2	CPI-SC0FDB4B6D9	simple:O60383	complex:TGFR_BMPR2	ENSG00000164404		curated	TRUE	FALSE	0.057 | 1.0	0.025 | 1.0	0.044 | 1.0	0.024 | 1.0	0.038 | 1.0	0.028 | 1.0	0.02 | 1.0	0.024 | 1.0	0.038 | 1.0	0.028 | 1.0	0.02 | 1.0	0.0 | 1.0	0.0 | 1.0	0.0 | 1.0	0.0 | 1.0	0.0 | 1.0	0.0 | 1.0	0.0 | 1.0	0.058 | 1.0	0.026 | 1.0	0.045 | 1.0	0.0 | 1.0	0.0 | 1.0	0.0 | 1.0	0.0 | 1.0
IL11 receptor_IL11	CPI-CS0DDFD82E7	complex:IL11 receptor	simple:P20809		ENSG00000095752	curated	TRUE	FALSE	0.014 | 1.0	0.0 | 1.0	0.015 | 1.0	0.015 | 1.0	0.011 | 1.0	0.012 | 1.0	0.013 | 1.0	0.019 | 1.0	0.016 | 1.0	0.017 | 1.0	0.018 | 1.0	0.014 | 1.0	0.0 | 1.0	0.015 | 1.0	0.011 | 1.0	0.008 | 1.0	0.009 | 1.0	0.009 | 1.0	0.017 | 1.0	0.0 | 1.0	0.018 | 1.0	0.013 | 1.0	0.01 | 1.0	0.011 | 1.0	0.011 | 1.0
SIRB1 complex_CD47	CPI-CS0522E79F9	complex:SIRB1 complex	simple:Q08722		ENSG00000196776	curated	FALSE	FALSE	0.037 | 1.0	0.17 | 1.0	0.041 | 1.0	0.051 | 1.0	0.099 | 1.0	0.06 | 1.0	0.051 | 1.0	0.052 | 1.0	0.1 | 1.0	0.061 | 1.0	0.052 | 1.0	0.0 | 1.0	0.0 | 1.0	0.0 | 1.0	0.0 | 1.0	0.0 | 1.0	0.0 | 1.0	0.0 | 1.0	0.0 | 1.0	0.0 | 1.0	0.0 | 1.0	0.051 | 1.0	0.099 | 1.0	0.06 | 1.0	0.051 | 1.0
MSTN_ACVR_1B2B receptor	CPI-SC0F360841D	simple:O14793	complex:ACVR_1B2B receptor	ENSG00000138379		curated	TRUE	FALSE	0.007 | 1.0	0.006 | 1.0	0.0 | 1.0	0.0 | 1.0	0.0 | 1.0	0.0 | 1.0	0.0 | 1.0	0.0 | 1.0	0.0 | 1.0	0.0 | 1.0	0.0 | 1.0	0.007 | 1.0	0.006 | 1.0	0.0 | 1.0	0.0 | 1.0	0.0 | 1.0	0.0 | 1.0	0.0 | 1.0	0.0 | 1.0	0.0 | 1.0	0.0 | 1.0	0.001 | 1.0	0.013 | 1.0	0.001 | 1.0	0.001 | 1.0
GDF11_ACVR_1B2B receptor	CPI-SC0AD8A8881	simple:O95390	complex:ACVR_1B2B receptor	ENSG00000135414		curated	TRUE	FALSE	0.052 | 1.0	0.051 | 1.0	0.0 | 1.0	0.056 | 1.0	0.067 | 1.0	0.056 | 1.0	0.056 | 1.0	0.046 | 1.0	0.057 | 1.0	0.046 | 1.0	0.046 | 1.0	0.036 | 1.0	0.035 | 1.0	0.0 | 1.0	0.041 | 1.0	0.052 | 1.0	0.041 | 1.0	0.041 | 1.0	0.038 | 1.0	0.038 | 1.0	0.0 | 1.0	0.052 | 1.0	0.063 | 1.0	0.052 | 1.0	0.052 | 1.0
GDF3_ACVR_1B2B receptor	CPI-SC0FD9DD4C7	simple:Q9NR23	complex:ACVR_1B2B receptor	ENSG00000184344		curated	TRUE	FALSE	0.009 | 1.0	0.008 | 1.0	0.0 | 1.0	0.0 | 1.0	0.0 | 1.0	0.0 | 1.0	0.0 | 1.0	0.002 | 1.0	0.014 | 1.0	0.002 | 1.0	0.002 | 1.0	0.007 | 1.0	0.006 | 1.0	0.0 | 1.0	0.002 | 1.0	0.013 | 1.0	0.001 | 1.0	0.001 | 1.0	0.007 | 1.0	0.006 | 1.0	0.0 | 1.0	0.001 | 1.0	0.013 | 1.0	0.001 | 1.0	0.001 | 1.0
GDF10_ACVR_1B2B receptor	CPI-SC0268F9B92	simple:P55107	complex:ACVR_1B2B receptor	ENSG00000266524		curated	TRUE	FALSE	0.083 | 1.0	0.082 | 1.0	0.0 | 1.0	0.263 | 1.0	0.275 | 1.0	0.263 | 1.0	0.263 | 1.0	0.021 | 1.0	0.033 | 1.0	0.021 | 1.0	0.021 | 1.0	0.028 | 1.0	0.027 | 1.0	0.0 | 1.0	0.228 | 1.0	0.24 | 1.0	0.228 | 1.0	0.228 | 1.0	0.195 | 1.0	0.194 | 1.0	0.0 | 1.0	0.322 | 1.0	0.333 | 1.0	0.321 | 1.0	0.321 | 1.0
MSTN_ACVR_1B2A receptor	CPI-SC0896DFC46	simple:O14793	complex:ACVR_1B2A receptor	ENSG00000138379		curated	TRUE	FALSE	0.009 | 1.0	0.019 | 1.0	0.006 | 1.0	0.0 | 1.0	0.0 | 1.0	0.0 | 1.0	0.0 | 1.0	0.0 | 1.0	0.0 | 1.0	0.0 | 1.0	0.0 | 1.0	0.009 | 1.0	0.019 | 1.0	0.006 | 1.0	0.0 | 1.0	0.0 | 1.0	0.0 | 1.0	0.0 | 1.0	0.0 | 1.0	0.0 | 1.0	0.0 | 1.0	0.008 | 1.0	0.022 | 1.0	0.007 | 1.0	0.004 | 1.0
GDF11_ACVR_1B2A receptor	CPI-SC0139F30ED	simple:O95390	complex:ACVR_1B2A receptor	ENSG00000135414		curated	TRUE	FALSE	0.053 | 1.0	0.063 | 1.0	0.051 | 1.0	0.063 | 1.0	0.077 | 1.0	0.061 | 1.0	0.058 | 1.0	0.053 | 1.0	0.067 | 1.0	0.051 | 1.0	0.048 | 1.0	0.038 | 1.0	0.048 | 1.0	0.035 | 1.0	0.048 | 1.0	0.062 | 1.0	0.047 | 1.0	0.044 | 1.0	0.04 | 1.0	0.05 | 1.0	0.038 | 1.0	0.059 | 1.0	0.073 | 1.0	0.057 | 1.0	0.054 | 1.0
BMP3_ACVR_1B2A receptor	CPI-SC0FA6F1D9A	simple:P12645	complex:ACVR_1B2A receptor	ENSG00000152785		curated	TRUE	FALSE	0.018 | 1.0	0.028 | 1.0	0.016 | 1.0	0.012 | 1.0	0.026 | 1.0	0.011 | 1.0	0.008 | 1.0	0.011 | 1.0	0.025 | 1.0	0.01 | 1.0	0.006 | 1.0	0.021 | 1.0	0.031 | 1.0	0.019 | 1.0	0.011 | 1.0	0.025 | 1.0	0.009 | 1.0	0.006 | 1.0	0.014 | 1.0	0.024 | 1.0	0.011 | 1.0	0.011 | 1.0	0.025 | 1.0	0.01 | 1.0	0.006 | 1.0
MSTN_TGFR_AVR2A	CPI-SC023986FB9	simple:O14793	complex:TGFR_AVR2A	ENSG00000138379		curated	TRUE	FALSE	0.009 | 1.0	0.019 | 1.0	0.006 | 1.0	0.0 | 1.0	0.0 | 1.0	0.0 | 1.0	0.0 | 1.0	0.0 | 1.0	0.0 | 1.0	0.0 | 1.0	0.0 | 1.0	0.009 | 1.0	0.019 | 1.0	0.006 | 1.0	0.0 | 1.0	0.0 | 1.0	0.0 | 1.0	0.0 | 1.0	0.0 | 1.0	0.0 | 1.0	0.0 | 1.0	0.008 | 1.0	0.022 | 1.0	0.007 | 1.0	0.004 | 1.0
GDF11_TGFR_AVR2A	CPI-SC001669E22	simple:O95390	complex:TGFR_AVR2A	ENSG00000135414		curated	TRUE	FALSE	0.053 | 1.0	0.063 | 1.0	0.051 | 1.0	0.063 | 1.0	0.077 | 1.0	0.061 | 1.0	0.058 | 1.0	0.053 | 1.0	0.067 | 1.0	0.051 | 1.0	0.048 | 1.0	0.038 | 1.0	0.048 | 1.0	0.035 | 1.0	0.048 | 1.0	0.062 | 1.0	0.047 | 1.0	0.044 | 1.0	0.04 | 1.0	0.05 | 1.0	0.038 | 1.0	0.059 | 1.0	0.073 | 1.0	0.057 | 1.0	0.054 | 1.0
MSTN_TGFR_AVR2B	CPI-SC08968AFE6	simple:O14793	complex:TGFR_AVR2B	ENSG00000138379		curated	TRUE	FALSE	0.007 | 1.0	0.006 | 1.0	0.0 | 1.0	0.0 | 1.0	0.0 | 1.0	0.0 | 1.0	0.0 | 1.0	0.0 | 1.0	0.0 | 1.0	0.0 | 1.0	0.0 | 1.0	0.007 | 1.0	0.006 | 1.0	0.0 | 1.0	0.0 | 1.0	0.0 | 1.0	0.0 | 1.0	0.0 | 1.0	0.0 | 1.0	0.0 | 1.0	0.0 | 1.0	0.001 | 1.0	0.013 | 1.0	0.001 | 1.0	0.001 | 1.0
GDF11_TGFR_AVR2B	CPI-SC017215F7F	simple:O95390	complex:TGFR_AVR2B	ENSG00000135414		curated	TRUE	FALSE	0.052 | 1.0	0.051 | 1.0	0.0 | 1.0	0.056 | 1.0	0.067 | 1.0	0.056 | 1.0	0.056 | 1.0	0.046 | 1.0	0.057 | 1.0	0.046 | 1.0	0.046 | 1.0	0.036 | 1.0	0.035 | 1.0	0.0 | 1.0	0.041 | 1.0	0.052 | 1.0	0.041 | 1.0	0.041 | 1.0	0.038 | 1.0	0.038 | 1.0	0.0 | 1.0	0.052 | 1.0	0.063 | 1.0	0.052 | 1.0	0.052 | 1.0
BMP10_ACVL1_BMPR2	CPI-SC07C452E3D	simple:O95393	complex:ACVL1_BMPR2	ENSG00000163217		curated	TRUE	FALSE	0.057 | 1.0	0.025 | 1.0	0.044 | 1.0	0.024 | 1.0	0.038 | 1.0	0.028 | 1.0	0.02 | 1.0	0.0 | 1.0	0.0 | 1.0	0.0 | 1.0	0.0 | 1.0	0.0 | 1.0	0.0 | 1.0	0.0 | 1.0	0.0 | 1.0	0.0 | 1.0	0.0 | 1.0	0.0 | 1.0	0.0 | 1.0	0.0 | 1.0	0.0 | 1.0	0.0 | 1.0	0.0 | 1.0	0.0 | 1.0	0.0 | 1.0
GDF2_ACVL1_BMPR2	CPI-SC05B4B8690	simple:Q9UK05	complex:ACVL1_BMPR2	ENSG00000263761		curated	TRUE	FALSE	0.058 | 1.0	0.027 | 1.0	0.045 | 1.0	0.0 | 1.0	0.0 | 1.0	0.0 | 1.0	0.0 | 1.0	0.026 | 1.0	0.04 | 1.0	0.03 | 1.0	0.022 | 1.0	0.059 | 1.0	0.027 | 1.0	0.046 | 1.0	0.025 | 1.0	0.039 | 1.0	0.029 | 1.0	0.02 | 1.0	0.0 | 1.0	0.0 | 1.0	0.0 | 1.0	0.024 | 1.0	0.038 | 1.0	0.028 | 1.0	0.019 | 1.0
BMP2_BMPR1A_BMPR2	CPI-SC070B9F112	simple:P12643	complex:BMPR1A_BMPR2	ENSG00000125845		curated	TRUE	FALSE	0.266 | 1.0	0.255 | 1.0	0.241 | 1.0	0.164 | 1.0	0.174 | 1.0	0.16 | 1.0	0.153 | 1.0	0.044 | 1.0	0.053 | 1.0	0.039 | 1.0	0.032 | 1.0	0.067 | 1.0	0.056 | 1.0	0.042 | 1.0	0.052 | 1.0	0.061 | 1.0	0.047 | 1.0	0.04 | 1.0	0.069 | 1.0	0.057 | 1.0	0.043 | 1.0	0.193 | 1.0	0.203 | 1.0	0.188 | 1.0	0.181 | 1.0
BMP7_BMPR1A_BMPR2	CPI-SC0B1EBCCC6	simple:P18075	complex:BMPR1A_BMPR2	ENSG00000101144		curated	TRUE	FALSE	0.053 | 1.0	0.041 | 1.0	0.027 | 1.0	0.252 | 1.0	0.261 | 1.0	0.247 | 1.0	0.24 | 1.0	0.057 | 1.0	0.066 | 1.0	0.052 | 1.0	0.045 | 1.0	0.057 | 1.0	0.046 | 1.0	0.031 | 1.0	0.049 | 1.0	0.059 | 1.0	0.044 | 1.0	0.038 | 1.0	0.049 | 1.0	0.037 | 1.0	0.023 | 1.0	0.188 | 1.0	0.198 | 1.0	0.183 | 1.0	0.176 | 1.0
BMP4_BMPR1A_BMPR2	CPI-SC0915DDE22	simple:P12644	complex:BMPR1A_BMPR2	ENSG00000125378		curated	TRUE	FALSE	0.054 | 1.0	0.042 | 1.0	0.028 | 1.0	0.068 | 1.0	0.077 | 1.0	0.063 | 1.0	0.056 | 1.0	0.036 | 1.0	0.046 | 1.0	0.031 | 1.0	0.024 | 1.0	0.051 | 1.0	0.039 | 1.0	0.025 | 1.0	0.062 | 1.0	0.072 | 1.0	0.057 | 1.0	0.051 | 1.0	0.079 | 1.0	0.068 | 1.0	0.053 | 1.0	0.083 | 1.0	0.093 | 1.0	0.078 | 1.0	0.072 | 1.0
BMP6_BMPR1A_BMPR2	CPI-SC00D19A858	simple:P22004	complex:BMPR1A_BMPR2	ENSG00000153162		curated	TRUE	FALSE	0.0 | 1.0	0.0 | 1.0	0.0 | 1.0	0.0 | 1.0	0.0 | 1.0	0.0 | 1.0	0.0 | 1.0	0.0 | 1.0	0.0 | 1.0	0.0 | 1.0	0.0 | 1.0	0.0 | 1.0	0.0 | 1.0	0.0 | 1.0	0.0 | 1.0	0.0 | 1.0	0.0 | 1.0	0.0 | 1.0	0.046 | 1.0	0.034 | 1.0	0.02 | 1.0	0.033 | 1.0	0.042 | 1.0	0.028 | 1.0	0.021 | 1.0
GDF5_BMPR1A_BMPR2	CPI-SC054964DD8	simple:P43026	complex:BMPR1A_BMPR2	ENSG00000125965		curated	TRUE	FALSE	0.046 | 1.0	0.035 | 1.0	0.02 | 1.0	0.034 | 1.0	0.044 | 1.0	0.029 | 1.0	0.022 | 1.0	0.034 | 1.0	0.043 | 1.0	0.029 | 1.0	0.022 | 1.0	0.047 | 1.0	0.035 | 1.0	0.021 | 1.0	0.035 | 1.0	0.045 | 1.0	0.03 | 1.0	0.023 | 1.0	0.047 | 1.0	0.035 | 1.0	0.021 | 1.0	0.0 | 1.0	0.0 | 1.0	0.0 | 1.0	0.0 | 1.0
BMP5_BMPR1A_BMPR2	CPI-SC085698C59	simple:P22003	complex:BMPR1A_BMPR2	ENSG00000112175		curated	TRUE	FALSE	0.057 | 1.0	0.046 | 1.0	0.031 | 1.0	0.038 | 1.0	0.047 | 1.0	0.033 | 1.0	0.026 | 1.0	0.039 | 1.0	0.049 | 1.0	0.034 | 1.0	0.027 | 1.0	0.057 | 1.0	0.046 | 1.0	0.031 | 1.0	0.034 | 1.0	0.044 | 1.0	0.029 | 1.0	0.023 | 1.0	0.053 | 1.0	0.042 | 1.0	0.027 | 1.0	0.037 | 1.0	0.047 | 1.0	0.032 | 1.0	0.026 | 1.0
GDF6_BMPR1A_BMPR2	CPI-SC0B118E8DA	simple:Q6KF10	complex:BMPR1A_BMPR2	ENSG00000156466		curated	TRUE	FALSE	0.046 | 1.0	0.034 | 1.0	0.02 | 1.0	0.033 | 1.0	0.043 | 1.0	0.028 | 1.0	0.021 | 1.0	0.0 | 1.0	0.0 | 1.0	0.0 | 1.0	0.0 | 1.0	0.047 | 1.0	0.035 | 1.0	0.021 | 1.0	0.035 | 1.0	0.045 | 1.0	0.03 | 1.0	0.023 | 1.0	0.053 | 1.0	0.042 | 1.0	0.027 | 1.0	0.034 | 1.0	0.044 | 1.0	0.03 | 1.0	0.023 | 1.0
GDF7_BMPR1A_BMPR2	CPI-SC0A1278CD8	simple:Q7Z4P5	complex:BMPR1A_BMPR2	ENSG00000143869		curated	TRUE	FALSE	0.048 | 1.0	0.037 | 1.0	0.023 | 1.0	0.049 | 1.0	0.059 | 1.0	0.044 | 1.0	0.037 | 1.0	0.0 | 1.0	0.0 | 1.0	0.0 | 1.0	0.0 | 1.0	0.0 | 1.0	0.0 | 1.0	0.0 | 1.0	0.033 | 1.0	0.043 | 1.0	0.028 | 1.0	0.021 | 1.0	0.046 | 1.0	0.034 | 1.0	0.02 | 1.0	0.041 | 1.0	0.051 | 1.0	0.036 | 1.0	0.03 | 1.0
BMP2_BMR1A_ACR2A	CPI-SC0464F1C6E	simple:P12643	complex:BMR1A_ACR2A	ENSG00000125845		curated	TRUE	FALSE	0.228 | 1.0	0.238 | 1.0	0.226 | 1.0	0.14 | 1.0	0.154 | 1.0	0.139 | 1.0	0.136 | 1.0	0.019 | 1.0	0.033 | 1.0	0.018 | 1.0	0.015 | 1.0	0.029 | 1.0	0.039 | 1.0	0.027 | 1.0	0.027 | 1.0	0.041 | 1.0	0.026 | 1.0	0.023 | 1.0	0.031 | 1.0	0.041 | 1.0	0.028 | 1.0	0.169 | 1.0	0.183 | 1.0	0.167 | 1.0	0.164 | 1.0
BMP7_BMR1A_ACR2A	CPI-SC0BACF0481	simple:P18075	complex:BMR1A_ACR2A	ENSG00000101144		curated	TRUE	FALSE	0.015 | 1.0	0.025 | 1.0	0.012 | 1.0	0.227 | 1.0	0.242 | 1.0	0.226 | 1.0	0.223 | 1.0	0.032 | 1.0	0.046 | 1.0	0.031 | 1.0	0.028 | 1.0	0.019 | 1.0	0.029 | 1.0	0.017 | 1.0	0.025 | 1.0	0.039 | 1.0	0.024 | 1.0	0.021 | 1.0	0.011 | 1.0	0.021 | 1.0	0.008 | 1.0	0.164 | 1.0	0.178 | 1.0	0.162 | 1.0	0.159 | 1.0
BMP4_BMR1A_ACR2A	CPI-SC052486D3E	simple:P12644	complex:BMR1A_ACR2A	ENSG00000125378		curated	TRUE	FALSE	0.016 | 1.0	0.026 | 1.0	0.013 | 1.0	0.043 | 1.0	0.057 | 1.0	0.042 | 1.0	0.039 | 1.0	0.012 | 1.0	0.026 | 1.0	0.01 | 1.0	0.007 | 1.0	0.013 | 1.0	0.023 | 1.0	0.01 | 1.0	0.038 | 1.0	0.052 | 1.0	0.037 | 1.0	0.034 | 1.0	0.041 | 1.0	0.051 | 1.0	0.039 | 1.0	0.059 | 1.0	0.073 | 1.0	0.057 | 1.0	0.054 | 1.0
BMP6_BMR1A_ACR2A	CPI-SC0C97FACEA	simple:P22004	complex:BMR1A_ACR2A	ENSG00000153162		curated	TRUE	FALSE	0.0 | 1.0	0.0 | 1.0	0.0 | 1.0	0.0 | 1.0	0.0 | 1.0	0.0 | 1.0	0.0 | 1.0	0.0 | 1.0	0.0 | 1.0	0.0 | 1.0	0.0 | 1.0	0.0 | 1.0	0.0 | 1.0	0.0 | 1.0	0.0 | 1.0	0.0 | 1.0	0.0 | 1.0	0.0 | 1.0	0.008 | 1.0	0.018 | 1.0	0.005 | 1.0	0.008 | 1.0	0.022 | 1.0	0.007 | 1.0	0.004 | 1.0
GDF5_BMR1A_ACR2A	CPI-SC061191F76	simple:P43026	complex:BMR1A_ACR2A	ENSG00000125965		curated	TRUE	FALSE	0.008 | 1.0	0.018 | 1.0	0.006 | 1.0	0.01 | 1.0	0.024 | 1.0	0.008 | 1.0	0.005 | 1.0	0.009 | 1.0	0.024 | 1.0	0.008 | 1.0	0.005 | 1.0	0.009 | 1.0	0.019 | 1.0	0.006 | 1.0	0.011 | 1.0	0.025 | 1.0	0.009 | 1.0	0.006 | 1.0	0.009 | 1.0	0.019 | 1.0	0.006 | 1.0	0.0 | 1.0	0.0 | 1.0	0.0 | 1.0	0.0 | 1.0
BMP5_BMR1A_ACR2A	CPI-SC09FC5131F	simple:P22003	complex:BMR1A_ACR2A	ENSG00000112175		curated	TRUE	FALSE	0.019 | 1.0	0.029 | 1.0	0.017 | 1.0	0.014 | 1.0	0.028 | 1.0	0.012 | 1.0	0.009 | 1.0	0.015 | 1.0	0.029 | 1.0	0.013 | 1.0	0.01 | 1.0	0.019 | 1.0	0.029 | 1.0	0.017 | 1.0	0.01 | 1.0	0.024 | 1.0	0.009 | 1.0	0.006 | 1.0	0.015 | 1.0	0.025 | 1.0	0.013 | 1.0	0.013 | 1.0	0.027 | 1.0	0.011 | 1.0	0.008 | 1.0
GDF6_BMR1A_ACR2A	CPI-SC00694A66B	simple:Q6KF10	complex:BMR1A_ACR2A	ENSG00000156466		curated	TRUE	FALSE	0.008 | 1.0	0.018 | 1.0	0.005 | 1.0	0.009 | 1.0	0.023 | 1.0	0.007 | 1.0	0.004 | 1.0	0.0 | 1.0	0.0 | 1.0	0.0 | 1.0	0.0 | 1.0	0.009 | 1.0	0.019 | 1.0	0.006 | 1.0	0.011 | 1.0	0.025 | 1.0	0.009 | 1.0	0.006 | 1.0	0.015 | 1.0	0.025 | 1.0	0.013 | 1.0	0.01 | 1.0	0.024 | 1.0	0.009 | 1.0	0.006 | 1.0
GDF7_BMR1A_ACR2A	CPI-SC08FDDEC16	simple:Q7Z4P5	complex:BMR1A_ACR2A	ENSG00000143869		curated	TRUE	FALSE	0.01 | 1.0	0.02 | 1.0	0.008 | 1.0	0.025 | 1.0	0.039 | 1.0	0.023 | 1.0	0.02 | 1.0	0.0 | 1.0	0.0 | 1.0	0.0 | 1.0	0.0 | 1.0	0.0 | 1.0	0.0 | 1.0	0.0 | 1.0	0.009 | 1.0	0.023 | 1.0	0.007 | 1.0	0.004 | 1.0	0.008 | 1.0	0.018 | 1.0	0.005 | 1.0	0.017 | 1.0	0.031 | 1.0	0.016 | 1.0	0.013 | 1.0
BMP2_BMR1A_AVR2B	CPI-SC04266947A	simple:P12643	complex:BMR1A_AVR2B	ENSG00000125845		curated	TRUE	FALSE	0.227 | 1.0	0.226 | 1.0	0.0 | 1.0	0.133 | 1.0	0.145 | 1.0	0.133 | 1.0	0.133 | 1.0	0.012 | 1.0	0.024 | 1.0	0.012 | 1.0	0.012 | 1.0	0.028 | 1.0	0.027 | 1.0	0.0 | 1.0	0.02 | 1.0	0.032 | 1.0	0.02 | 1.0	0.02 | 1.0	0.029 | 1.0	0.028 | 1.0	0.0 | 1.0	0.162 | 1.0	0.173 | 1.0	0.161 | 1.0	0.161 | 1.0
BMP7_BMR1A_AVR2B	CPI-SC049520B40	simple:P18075	complex:BMR1A_AVR2B	ENSG00000101144		curated	TRUE	FALSE	0.013 | 1.0	0.012 | 1.0	0.0 | 1.0	0.22 | 1.0	0.232 | 1.0	0.22 | 1.0	0.22 | 1.0	0.025 | 1.0	0.037 | 1.0	0.025 | 1.0	0.025 | 1.0	0.017 | 1.0	0.017 | 1.0	0.0 | 1.0	0.018 | 1.0	0.029 | 1.0	0.018 | 1.0	0.018 | 1.0	0.009 | 1.0	0.008 | 1.0	0.0 | 1.0	0.157 | 1.0	0.168 | 1.0	0.156 | 1.0	0.157 | 1.0
BMP4_BMR1A_AVR2B	CPI-SC01D95B14C	simple:P12644	complex:BMR1A_AVR2B	ENSG00000125378		curated	TRUE	FALSE	0.014 | 1.0	0.013 | 1.0	0.0 | 1.0	0.036 | 1.0	0.048 | 1.0	0.036 | 1.0	0.036 | 1.0	0.005 | 1.0	0.016 | 1.0	0.005 | 1.0	0.005 | 1.0	0.011 | 1.0	0.01 | 1.0	0.0 | 1.0	0.031 | 1.0	0.042 | 1.0	0.031 | 1.0	0.031 | 1.0	0.039 | 1.0	0.039 | 1.0	0.0 | 1.0	0.052 | 1.0	0.063 | 1.0	0.052 | 1.0	0.052 | 1.0
BMP6_BMR1A_AVR2B	CPI-SC0D05B755E	simple:P22004	complex:BMR1A_AVR2B	ENSG00000153162		curated	TRUE	FALSE	0.0 | 1.0	0.0 | 1.0	0.0 | 1.0	0.0 | 1.0	0.0 | 1.0	0.0 | 1.0	0.0 | 1.0	0.0 | 1.0	0.0 | 1.0	0.0 | 1.0	0.0 | 1.0	0.0 | 1.0	0.0 | 1.0	0.0 | 1.0	0.0 | 1.0	0.0 | 1.0	0.0 | 1.0	0.0 | 1.0	0.006 | 1.0	0.005 | 1.0	0.0 | 1.0	0.001 | 1.0	0.013 | 1.0	0.001 | 1.0	0.001 | 1.0
GDF5_BMR1A_AVR2B	CPI-SC02AACC81C	simple:P43026	complex:BMR1A_AVR2B	ENSG00000125965		curated	TRUE	FALSE	0.007 | 1.0	0.006 | 1.0	0.0 | 1.0	0.003 | 1.0	0.014 | 1.0	0.003 | 1.0	0.003 | 1.0	0.002 | 1.0	0.014 | 1.0	0.002 | 1.0	0.002 | 1.0	0.007 | 1.0	0.006 | 1.0	0.0 | 1.0	0.004 | 1.0	0.015 | 1.0	0.004 | 1.0	0.004 | 1.0	0.007 | 1.0	0.006 | 1.0	0.0 | 1.0	0.0 | 1.0	0.0 | 1.0	0.0 | 1.0	0.0 | 1.0
BMP5_BMR1A_AVR2B	CPI-SC09E264612	simple:P22003	complex:BMR1A_AVR2B	ENSG00000112175		curated	TRUE	FALSE	0.017 | 1.0	0.017 | 1.0	0.0 | 1.0	0.007 | 1.0	0.018 | 1.0	0.006 | 1.0	0.006 | 1.0	0.008 | 1.0	0.019 | 1.0	0.008 | 1.0	0.008 | 1.0	0.017 | 1.0	0.017 | 1.0	0.0 | 1.0	0.003 | 1.0	0.014 | 1.0	0.003 | 1.0	0.003 | 1.0	0.013 | 1.0	0.013 | 1.0	0.0 | 1.0	0.006 | 1.0	0.017 | 1.0	0.006 | 1.0	0.006 | 1.0
GDF6_BMR1A_AVR2B	CPI-SC0A4134C6C	simple:Q6KF10	complex:BMR1A_AVR2B	ENSG00000156466		curated	TRUE	FALSE	0.006 | 1.0	0.005 | 1.0	0.0 | 1.0	0.002 | 1.0	0.013 | 1.0	0.002 | 1.0	0.002 | 1.0	0.0 | 1.0	0.0 | 1.0	0.0 | 1.0	0.0 | 1.0	0.007 | 1.0	0.006 | 1.0	0.0 | 1.0	0.004 | 1.0	0.015 | 1.0	0.004 | 1.0	0.004 | 1.0	0.013 | 1.0	0.013 | 1.0	0.0 | 1.0	0.003 | 1.0	0.014 | 1.0	0.003 | 1.0	0.003 | 1.0
GDF7_BMR1A_AVR2B	CPI-SC02B778C0B	simple:Q7Z4P5	complex:BMR1A_AVR2B	ENSG00000143869		curated	TRUE	FALSE	0.009 | 1.0	0.008 | 1.0	0.0 | 1.0	0.018 | 1.0	0.029 | 1.0	0.017 | 1.0	0.018 | 1.0	0.0 | 1.0	0.0 | 1.0	0.0 | 1.0	0.0 | 1.0	0.0 | 1.0	0.0 | 1.0	0.0 | 1.0	0.002 | 1.0	0.013 | 1.0	0.001 | 1.0	0.001 | 1.0	0.006 | 1.0	0.005 | 1.0	0.0 | 1.0	0.01 | 1.0	0.021 | 1.0	0.01 | 1.0	0.01 | 1.0
BMP2_BMPR1B_BMPR2	CPI-SC0C403F032	simple:P12643	complex:BMPR1B_BMPR2	ENSG00000125845		curated	TRUE	FALSE	0.222 | 1.0	0.242 | 1.0	0.0 | 1.0	0.0 | 1.0	0.138 | 1.0	0.133 | 1.0	0.133 | 1.0	0.0 | 1.0	0.017 | 1.0	0.012 | 1.0	0.012 | 1.0	0.023 | 1.0	0.044 | 1.0	0.0 | 1.0	0.0 | 1.0	0.025 | 1.0	0.02 | 1.0	0.02 | 1.0	0.025 | 1.0	0.045 | 1.0	0.0 | 1.0	0.0 | 1.0	0.166 | 1.0	0.161 | 1.0	0.161 | 1.0
BMP7_BMPR1B_BMPR2	CPI-SC0DA028FF9	simple:P18075	complex:BMPR1B_BMPR2	ENSG00000101144		curated	TRUE	FALSE	0.009 | 1.0	0.029 | 1.0	0.0 | 1.0	0.0 | 1.0	0.225 | 1.0	0.22 | 1.0	0.22 | 1.0	0.0 | 1.0	0.03 | 1.0	0.025 | 1.0	0.025 | 1.0	0.013 | 1.0	0.033 | 1.0	0.0 | 1.0	0.0 | 1.0	0.023 | 1.0	0.018 | 1.0	0.018 | 1.0	0.005 | 1.0	0.025 | 1.0	0.0 | 1.0	0.0 | 1.0	0.161 | 1.0	0.156 | 1.0	0.157 | 1.0
BMP4_BMPR1B_BMPR2	CPI-SC07F8BC578	simple:P12644	complex:BMPR1B_BMPR2	ENSG00000125378		curated	TRUE	FALSE	0.01 | 1.0	0.03 | 1.0	0.0 | 1.0	0.0 | 1.0	0.041 | 1.0	0.036 | 1.0	0.036 | 1.0	0.0 | 1.0	0.009 | 1.0	0.005 | 1.0	0.005 | 1.0	0.007 | 1.0	0.027 | 1.0	0.0 | 1.0	0.0 | 1.0	0.035 | 1.0	0.031 | 1.0	0.031 | 1.0	0.035 | 1.0	0.055 | 1.0	0.0 | 1.0	0.0 | 1.0	0.056 | 1.0	0.052 | 1.0	0.052 | 1.0
BMP6_BMPR1B_BMPR2	CPI-SC0DDF53DDB	simple:P22004	complex:BMPR1B_BMPR2	ENSG00000153162		curated	TRUE	FALSE	0.0 | 1.0	0.0 | 1.0	0.0 | 1.0	0.0 | 1.0	0.0 | 1.0	0.0 | 1.0	0.0 | 1.0	0.0 | 1.0	0.0 | 1.0	0.0 | 1.0	0.0 | 1.0	0.0 | 1.0	0.0 | 1.0	0.0 | 1.0	0.0 | 1.0	0.0 | 1.0	0.0 | 1.0	0.0 | 1.0	0.002 | 1.0	0.022 | 1.0	0.0 | 1.0	0.0 | 1.0	0.006 | 1.0	0.001 | 1.0	0.001 | 1.0
GDF5_BMPR1B_BMPR2	CPI-SC0A76B562F	simple:P43026	complex:BMPR1B_BMPR2	ENSG00000125965		curated	TRUE	FALSE	0.002 | 1.0	0.022 | 1.0	0.0 | 1.0	0.0 | 1.0	0.007 | 1.0	0.003 | 1.0	0.003 | 1.0	0.0 | 1.0	0.007 | 1.0	0.002 | 1.0	0.002 | 1.0	0.003 | 1.0	0.023 | 1.0	0.0 | 1.0	0.0 | 1.0	0.008 | 1.0	0.004 | 1.0	0.004 | 1.0	0.003 | 1.0	0.023 | 1.0	0.0 | 1.0	0.0 | 1.0	0.0 | 1.0	0.0 | 1.0	0.0 | 1.0
BMP5_BMPR1B_BMPR2	CPI-SC08AB23320	simple:P22003	complex:BMPR1B_BMPR2	ENSG00000112175		curated	TRUE	FALSE	0.013 | 1.0	0.033 | 1.0	0.0 | 1.0	0.0 | 1.0	0.011 | 1.0	0.006 | 1.0	0.006 | 1.0	0.0 | 1.0	0.012 | 1.0	0.008 | 1.0	0.008 | 1.0	0.013 | 1.0	0.033 | 1.0	0.0 | 1.0	0.0 | 1.0	0.007 | 1.0	0.003 | 1.0	0.003 | 1.0	0.009 | 1.0	0.029 | 1.0	0.0 | 1.0	0.0 | 1.0	0.01 | 1.0	0.006 | 1.0	0.006 | 1.0
GDF6_BMPR1B_BMPR2	CPI-SC090BF166F	simple:Q6KF10	complex:BMPR1B_BMPR2	ENSG00000156466		curated	TRUE	FALSE	0.002 | 1.0	0.022 | 1.0	0.0 | 1.0	0.0 | 1.0	0.006 | 1.0	0.002 | 1.0	0.002 | 1.0	0.0 | 1.0	0.0 | 1.0	0.0 | 1.0	0.0 | 1.0	0.003 | 1.0	0.023 | 1.0	0.0 | 1.0	0.0 | 1.0	0.008 | 1.0	0.004 | 1.0	0.004 | 1.0	0.009 | 1.0	0.029 | 1.0	0.0 | 1.0	0.0 | 1.0	0.008 | 1.0	0.003 | 1.0	0.003 | 1.0
GDF7_BMPR1B_BMPR2	CPI-SC039AFE4AD	simple:Q7Z4P5	complex:BMPR1B_BMPR2	ENSG00000143869		curated	TRUE	FALSE	0.004 | 1.0	0.025 | 1.0	0.0 | 1.0	0.0 | 1.0	0.022 | 1.0	0.017 | 1.0	0.018 | 1.0	0.0 | 1.0	0.0 | 1.0	0.0 | 1.0	0.0 | 1.0	0.0 | 1.0	0.0 | 1.0	0.0 | 1.0	0.0 | 1.0	0.006 | 1.0	0.001 | 1.0	0.001 | 1.0	0.002 | 1.0	0.022 | 1.0	0.0 | 1.0	0.0 | 1.0	0.014 | 1.0	0.01 | 1.0	0.01 | 1.0
BMP15_BMPR1B_BMPR2	CPI-SC058533A46	simple:O95972	complex:BMPR1B_BMPR2	ENSG00000130385		curated	TRUE	FALSE	0.0 | 1.0	0.0 | 1.0	0.0 | 1.0	0.0 | 1.0	0.0 | 1.0	0.0 | 1.0	0.0 | 1.0	0.0 | 1.0	0.006 | 1.0	0.001 | 1.0	0.002 | 1.0	0.003 | 1.0	0.023 | 1.0	0.0 | 1.0	0.0 | 1.0	0.007 | 1.0	0.003 | 1.0	0.003 | 1.0	0.002 | 1.0	0.022 | 1.0	0.0 | 1.0	0.0 | 1.0	0.0 | 1.0	0.0 | 1.0	0.0 | 1.0
BMP2_BMR1B_AVR2A	CPI-SC05FF723A3	simple:P12643	complex:BMR1B_AVR2A	ENSG00000125845		curated	TRUE	FALSE	0.222 | 1.0	0.242 | 1.0	0.0 | 1.0	0.0 | 1.0	0.138 | 1.0	0.133 | 1.0	0.133 | 1.0	0.0 | 1.0	0.017 | 1.0	0.012 | 1.0	0.012 | 1.0	0.023 | 1.0	0.044 | 1.0	0.0 | 1.0	0.0 | 1.0	0.025 | 1.0	0.02 | 1.0	0.02 | 1.0	0.025 | 1.0	0.045 | 1.0	0.0 | 1.0	0.0 | 1.0	0.166 | 1.0	0.161 | 1.0	0.161 | 1.0
BMP7_BMR1B_AVR2A	CPI-SC0D389E644	simple:P18075	complex:BMR1B_AVR2A	ENSG00000101144		curated	TRUE	FALSE	0.009 | 1.0	0.029 | 1.0	0.0 | 1.0	0.0 | 1.0	0.225 | 1.0	0.22 | 1.0	0.22 | 1.0	0.0 | 1.0	0.03 | 1.0	0.025 | 1.0	0.025 | 1.0	0.013 | 1.0	0.033 | 1.0	0.0 | 1.0	0.0 | 1.0	0.023 | 1.0	0.018 | 1.0	0.018 | 1.0	0.005 | 1.0	0.025 | 1.0	0.0 | 1.0	0.0 | 1.0	0.161 | 1.0	0.156 | 1.0	0.157 | 1.0
BMP4_BMR1B_AVR2A	CPI-SC00DB2B867	simple:P12644	complex:BMR1B_AVR2A	ENSG00000125378		curated	TRUE	FALSE	0.01 | 1.0	0.03 | 1.0	0.0 | 1.0	0.0 | 1.0	0.041 | 1.0	0.036 | 1.0	0.036 | 1.0	0.0 | 1.0	0.009 | 1.0	0.005 | 1.0	0.005 | 1.0	0.007 | 1.0	0.027 | 1.0	0.0 | 1.0	0.0 | 1.0	0.035 | 1.0	0.031 | 1.0	0.031 | 1.0	0.035 | 1.0	0.055 | 1.0	0.0 | 1.0	0.0 | 1.0	0.056 | 1.0	0.052 | 1.0	0.052 | 1.0
BMP6_BMR1B_AVR2A	CPI-SC0C676F3BE	simple:P22004	complex:BMR1B_AVR2A	ENSG00000153162		curated	TRUE	FALSE	0.0 | 1.0	0.0 | 1.0	0.0 | 1.0	0.0 | 1.0	0.0 | 1.0	0.0 | 1.0	0.0 | 1.0	0.0 | 1.0	0.0 | 1.0	0.0 | 1.0	0.0 | 1.0	0.0 | 1.0	0.0 | 1.0	0.0 | 1.0	0.0 | 1.0	0.0 | 1.0	0.0 | 1.0	0.0 | 1.0	0.002 | 1.0	0.022 | 1.0	0.0 | 1.0	0.0 | 1.0	0.006 | 1.0	0.001 | 1.0	0.001 | 1.0
GDF5_BMR1B_AVR2A	CPI-SC011C55B71	simple:P43026	complex:BMR1B_AVR2A	ENSG00000125965		curated	TRUE	FALSE	0.002 | 1.0	0.022 | 1.0	0.0 | 1.0	0.0 | 1.0	0.007 | 1.0	0.003 | 1.0	0.003 | 1.0	0.0 | 1.0	0.007 | 1.0	0.002 | 1.0	0.002 | 1.0	0.003 | 1.0	0.023 | 1.0	0.0 | 1.0	0.0 | 1.0	0.008 | 1.0	0.004 | 1.0	0.004 | 1.0	0.003 | 1.0	0.023 | 1.0	0.0 | 1.0	0.0 | 1.0	0.0 | 1.0	0.0 | 1.0	0.0 | 1.0
BMP5_BMR1B_AVR2A	CPI-SC00CF68ED3	simple:P22003	complex:BMR1B_AVR2A	ENSG00000112175		curated	TRUE	FALSE	0.013 | 1.0	0.033 | 1.0	0.0 | 1.0	0.0 | 1.0	0.011 | 1.0	0.006 | 1.0	0.006 | 1.0	0.0 | 1.0	0.012 | 1.0	0.008 | 1.0	0.008 | 1.0	0.013 | 1.0	0.033 | 1.0	0.0 | 1.0	0.0 | 1.0	0.007 | 1.0	0.003 | 1.0	0.003 | 1.0	0.009 | 1.0	0.029 | 1.0	0.0 | 1.0	0.0 | 1.0	0.01 | 1.0	0.006 | 1.0	0.006 | 1.0
GDF6_BMR1B_AVR2A	CPI-SC0E5E4119C	simple:Q6KF10	complex:BMR1B_AVR2A	ENSG00000156466		curated	TRUE	FALSE	0.002 | 1.0	0.022 | 1.0	0.0 | 1.0	0.0 | 1.0	0.006 | 1.0	0.002 | 1.0	0.002 | 1.0	0.0 | 1.0	0.0 | 1.0	0.0 | 1.0	0.0 | 1.0	0.003 | 1.0	0.023 | 1.0	0.0 | 1.0	0.0 | 1.0	0.008 | 1.0	0.004 | 1.0	0.004 | 1.0	0.009 | 1.0	0.029 | 1.0	0.0 | 1.0	0.0 | 1.0	0.008 | 1.0	0.003 | 1.0	0.003 | 1.0
GDF7_BMR1B_AVR2A	CPI-SC0819046AF	simple:Q7Z4P5	complex:BMR1B_AVR2A	ENSG00000143869		curated	TRUE	FALSE	0.004 | 1.0	0.025 | 1.0	0.0 | 1.0	0.0 | 1.0	0.022 | 1.0	0.017 | 1.0	0.018 | 1.0	0.0 | 1.0	0.0 | 1.0	0.0 | 1.0	0.0 | 1.0	0.0 | 1.0	0.0 | 1.0	0.0 | 1.0	0.0 | 1.0	0.006 | 1.0	0.001 | 1.0	0.001 | 1.0	0.002 | 1.0	0.022 | 1.0	0.0 | 1.0	0.0 | 1.0	0.014 | 1.0	0.01 | 1.0	0.01 | 1.0
BMP7_ACVR1_BMPR2	CPI-SC04771EF53	simple:P18075	complex:ACVR1_BMPR2	ENSG00000101144		curated	TRUE	FALSE	0.065 | 1.0	0.033 | 1.0	0.052 | 1.0	0.243 | 1.0	0.257 | 1.0	0.247 | 1.0	0.239 | 1.0	0.048 | 1.0	0.062 | 1.0	0.052 | 1.0	0.043 | 1.0	0.069 | 1.0	0.037 | 1.0	0.056 | 1.0	0.041 | 1.0	0.055 | 1.0	0.044 | 1.0	0.036 | 1.0	0.061 | 1.0	0.029 | 1.0	0.048 | 1.0	0.179 | 1.0	0.193 | 1.0	0.183 | 1.0	0.175 | 1.0
BMP6_ACVR1_BMPR2	CPI-SC00DF87C38	simple:P22004	complex:ACVR1_BMPR2	ENSG00000153162		curated	TRUE	FALSE	0.0 | 1.0	0.0 | 1.0	0.0 | 1.0	0.0 | 1.0	0.0 | 1.0	0.0 | 1.0	0.0 | 1.0	0.0 | 1.0	0.0 | 1.0	0.0 | 1.0	0.0 | 1.0	0.0 | 1.0	0.0 | 1.0	0.0 | 1.0	0.0 | 1.0	0.0 | 1.0	0.0 | 1.0	0.0 | 1.0	0.058 | 1.0	0.026 | 1.0	0.045 | 1.0	0.024 | 1.0	0.038 | 1.0	0.028 | 1.0	0.019 | 1.0
BMP5_ACVR1_BMPR2	CPI-SC0D0822443	simple:P22003	complex:ACVR1_BMPR2	ENSG00000112175		curated	TRUE	FALSE	0.069 | 1.0	0.037 | 1.0	0.056 | 1.0	0.029 | 1.0	0.043 | 1.0	0.033 | 1.0	0.025 | 1.0	0.03 | 1.0	0.044 | 1.0	0.034 | 1.0	0.026 | 1.0	0.069 | 1.0	0.037 | 1.0	0.056 | 1.0	0.025 | 1.0	0.039 | 1.0	0.029 | 1.0	0.021 | 1.0	0.065 | 1.0	0.033 | 1.0	0.052 | 1.0	0.028 | 1.0	0.042 | 1.0	0.032 | 1.0	0.024 | 1.0
BMP7_ACVR_1A2B receptor	CPI-SC0FD1DE897	simple:P18075	complex:ACVR_1A2B receptor	ENSG00000101144		curated	TRUE	FALSE	0.013 | 1.0	0.012 | 1.0	0.0 | 1.0	0.22 | 1.0	0.232 | 1.0	0.22 | 1.0	0.22 | 1.0	0.025 | 1.0	0.037 | 1.0	0.025 | 1.0	0.025 | 1.0	0.017 | 1.0	0.017 | 1.0	0.0 | 1.0	0.018 | 1.0	0.029 | 1.0	0.018 | 1.0	0.018 | 1.0	0.009 | 1.0	0.008 | 1.0	0.0 | 1.0	0.157 | 1.0	0.168 | 1.0	0.156 | 1.0	0.157 | 1.0
BMP6_ACVR_1A2B receptor	CPI-SC0446E01DF	simple:P22004	complex:ACVR_1A2B receptor	ENSG00000153162		curated	TRUE	FALSE	0.0 | 1.0	0.0 | 1.0	0.0 | 1.0	0.0 | 1.0	0.0 | 1.0	0.0 | 1.0	0.0 | 1.0	0.0 | 1.0	0.0 | 1.0	0.0 | 1.0	0.0 | 1.0	0.0 | 1.0	0.0 | 1.0	0.0 | 1.0	0.0 | 1.0	0.0 | 1.0	0.0 | 1.0	0.0 | 1.0	0.006 | 1.0	0.005 | 1.0	0.0 | 1.0	0.001 | 1.0	0.013 | 1.0	0.001 | 1.0	0.001 | 1.0
BMP5_ACVR_1A2B receptor	CPI-SC0C44F0E54	simple:P22003	complex:ACVR_1A2B receptor	ENSG00000112175		curated	TRUE	FALSE	0.017 | 1.0	0.017 | 1.0	0.0 | 1.0	0.007 | 1.0	0.018 | 1.0	0.006 | 1.0	0.006 | 1.0	0.008 | 1.0	0.019 | 1.0	0.008 | 1.0	0.008 | 1.0	0.017 | 1.0	0.017 | 1.0	0.0 | 1.0	0.003 | 1.0	0.014 | 1.0	0.003 | 1.0	0.003 | 1.0	0.013 | 1.0	0.013 | 1.0	0.0 | 1.0	0.006 | 1.0	0.017 | 1.0	0.006 | 1.0	0.006 | 1.0
BMP7_ACVR_1A2A receptor	CPI-SC028CAD37D	simple:P18075	complex:ACVR_1A2A receptor	ENSG00000101144		curated	TRUE	FALSE	0.015 | 1.0	0.025 | 1.0	0.012 | 1.0	0.227 | 1.0	0.242 | 1.0	0.226 | 1.0	0.223 | 1.0	0.032 | 1.0	0.046 | 1.0	0.031 | 1.0	0.028 | 1.0	0.019 | 1.0	0.029 | 1.0	0.017 | 1.0	0.025 | 1.0	0.039 | 1.0	0.024 | 1.0	0.021 | 1.0	0.011 | 1.0	0.021 | 1.0	0.008 | 1.0	0.164 | 1.0	0.178 | 1.0	0.162 | 1.0	0.159 | 1.0
BMP6_ACVR_1A2A receptor	CPI-SC056627215	simple:P22004	complex:ACVR_1A2A receptor	ENSG00000153162		curated	TRUE	FALSE	0.0 | 1.0	0.0 | 1.0	0.0 | 1.0	0.0 | 1.0	0.0 | 1.0	0.0 | 1.0	0.0 | 1.0	0.0 | 1.0	0.0 | 1.0	0.0 | 1.0	0.0 | 1.0	0.0 | 1.0	0.0 | 1.0	0.0 | 1.0	0.0 | 1.0	0.0 | 1.0	0.0 | 1.0	0.0 | 1.0	0.008 | 1.0	0.018 | 1.0	0.005 | 1.0	0.008 | 1.0	0.022 | 1.0	0.007 | 1.0	0.004 | 1.0
BMP5_ACVR_1A2A receptor	CPI-SC08C740EAA	simple:P22003	complex:ACVR_1A2A receptor	ENSG00000112175		curated	TRUE	FALSE	0.019 | 1.0	0.029 | 1.0	0.017 | 1.0	0.014 | 1.0	0.028 | 1.0	0.012 | 1.0	0.009 | 1.0	0.015 | 1.0	0.029 | 1.0	0.013 | 1.0	0.01 | 1.0	0.019 | 1.0	0.029 | 1.0	0.017 | 1.0	0.01 | 1.0	0.024 | 1.0	0.009 | 1.0	0.006 | 1.0	0.015 | 1.0	0.025 | 1.0	0.013 | 1.0	0.013 | 1.0	0.027 | 1.0	0.011 | 1.0	0.008 | 1.0
a6b4 complex_NRG1	CPI-CS06A26EED8	complex:a6b4 complex	simple:Q02297		ENSG00000157168	curated	TRUE	TRUE	0.031 | 1.0	0.043 | 1.0	0.022 | 1.0	0.013 | 1.0	0.017 | 1.0	0.01 | 1.0	0.015 | 1.0	0.091 | 1.0	0.095 | 1.0	0.088 | 1.0	0.093 | 1.0	0.127 | 1.0	0.139 | 1.0	0.118 | 1.0	0.012 | 1.0	0.016 | 1.0	0.009 | 1.0	0.013 | 1.0	0.019 | 1.0	0.031 | 1.0	0.01 | 1.0	0.011 | 1.0	0.016 | 1.0	0.009 | 1.0	0.013 | 1.0
SEMA7A_a1b1 complex	CPI-SC0EAF80261	simple:O75326	complex:a1b1 complex	ENSG00000138623		curated	FALSE	TRUE	0.051 | 1.0	0.005 | 1.0	0.015 | 1.0	0.003 | 1.0	0.002 | 1.0	0.017 | 1.0	0.006 | 1.0	0.0 | 1.0	0.0 | 1.0	0.0 | 1.0	0.0 | 1.0	0.053 | 1.0	0.006 | 1.0	0.017 | 1.0	0.004 | 1.0	0.002 | 1.0	0.018 | 1.0	0.006 | 1.0	0.052 | 1.0	0.005 | 1.0	0.016 | 1.0	0.003 | 1.0	0.002 | 1.0	0.018 | 1.0	0.006 | 1.0
IFNA13_Type I IFNR	CPI-SC064937925	simple:P01562	complex:Type I IFNR	ENSG00000233816		curated	TRUE	FALSE	0.001 | 1.0	0.011 | 1.0	0.004 | 1.0	0.003 | 1.0	0.007 | 1.0	0.004 | 1.0	0.003 | 1.0	0.0 | 1.0	0.0 | 1.0	0.0 | 1.0	0.0 | 1.0	0.0 | 1.0	0.0 | 1.0	0.0 | 1.0	0.0 | 1.0	0.0 | 1.0	0.0 | 1.0	0.0 | 1.0	0.004 | 1.0	0.014 | 1.0	0.006 | 1.0	0.004 | 1.0	0.008 | 1.0	0.005 | 1.0	0.004 | 1.0
IFNE_Type I IFNR	CPI-SC0859FAC25	simple:Q86WN2	complex:Type I IFNR	ENSG00000184995		curated	TRUE	FALSE	0.002 | 1.0	0.011 | 1.0	0.004 | 1.0	0.0 | 1.0	0.0 | 1.0	0.0 | 1.0	0.0 | 1.0	0.0 | 1.0	0.0 | 1.0	0.0 | 1.0	0.0 | 1.0	0.0 | 1.0	0.0 | 1.0	0.0 | 1.0	0.0 | 1.0	0.0 | 1.0	0.0 | 1.0	0.0 | 1.0	0.0 | 1.0	0.0 | 1.0	0.0 | 1.0	0.0 | 1.0	0.0 | 1.0	0.0 | 1.0	0.0 | 1.0
IFNA4_Type I IFNR	CPI-SC0EC4B9BBD	simple:P05014	complex:Type I IFNR	ENSG00000236637		curated	TRUE	FALSE	0.001 | 1.0	0.011 | 1.0	0.004 | 1.0	0.003 | 1.0	0.007 | 1.0	0.004 | 1.0	0.003 | 1.0	0.0 | 1.0	0.0 | 1.0	0.0 | 1.0	0.0 | 1.0	0.0 | 1.0	0.0 | 1.0	0.0 | 1.0	0.0 | 1.0	0.0 | 1.0	0.0 | 1.0	0.0 | 1.0	0.004 | 1.0	0.014 | 1.0	0.006 | 1.0	0.004 | 1.0	0.008 | 1.0	0.005 | 1.0	0.004 | 1.0
IFNA5_Type I IFNR	CPI-SC09458C6C0	simple:P01569	complex:Type I IFNR	ENSG00000147873		curated	TRUE	FALSE	0.001 | 1.0	0.011 | 1.0	0.004 | 1.0	0.003 | 1.0	0.007 | 1.0	0.004 | 1.0	0.003 | 1.0	0.0 | 1.0	0.0 | 1.0	0.0 | 1.0	0.0 | 1.0	0.0 | 1.0	0.0 | 1.0	0.0 | 1.0	0.0 | 1.0	0.0 | 1.0	0.0 | 1.0	0.0 | 1.0	0.004 | 1.0	0.014 | 1.0	0.006 | 1.0	0.004 | 1.0	0.008 | 1.0	0.005 | 1.0	0.004 | 1.0
IFNA16_Type I IFNR	CPI-SC0B0AFEFF1	simple:P05015	complex:Type I IFNR	ENSG00000147885		curated	TRUE	FALSE	0.001 | 1.0	0.011 | 1.0	0.004 | 1.0	0.003 | 1.0	0.007 | 1.0	0.004 | 1.0	0.003 | 1.0	0.0 | 1.0	0.0 | 1.0	0.0 | 1.0	0.0 | 1.0	0.0 | 1.0	0.0 | 1.0	0.0 | 1.0	0.0 | 1.0	0.0 | 1.0	0.0 | 1.0	0.0 | 1.0	0.004 | 1.0	0.014 | 1.0	0.006 | 1.0	0.004 | 1.0	0.008 | 1.0	0.005 | 1.0	0.004 | 1.0
IFNA8_Type I IFNR	CPI-SC09AF1889C	simple:P32881	complex:Type I IFNR	ENSG00000120242		curated	TRUE	FALSE	0.001 | 1.0	0.011 | 1.0	0.004 | 1.0	0.003 | 1.0	0.007 | 1.0	0.004 | 1.0	0.003 | 1.0	0.0 | 1.0	0.0 | 1.0	0.0 | 1.0	0.0 | 1.0	0.0 | 1.0	0.0 | 1.0	0.0 | 1.0	0.0 | 1.0	0.0 | 1.0	0.0 | 1.0	0.0 | 1.0	0.004 | 1.0	0.014 | 1.0	0.006 | 1.0	0.004 | 1.0	0.008 | 1.0	0.005 | 1.0	0.004 | 1.0
IFNA14_Type I IFNR	CPI-SC0AF90F422	simple:P01570	complex:Type I IFNR	ENSG00000228083		curated	TRUE	FALSE	0.001 | 1.0	0.011 | 1.0	0.004 | 1.0	0.003 | 1.0	0.007 | 1.0	0.004 | 1.0	0.003 | 1.0	0.0 | 1.0	0.0 | 1.0	0.0 | 1.0	0.0 | 1.0	0.0 | 1.0	0.0 | 1.0	0.0 | 1.0	0.0 | 1.0	0.0 | 1.0	0.0 | 1.0	0.0 | 1.0	0.004 | 1.0	0.014 | 1.0	0.006 | 1.0	0.004 | 1.0	0.008 | 1.0	0.005 | 1.0	0.004 | 1.0
IFNA21_Type I IFNR	CPI-SC0A8A78670	simple:P01568	complex:Type I IFNR	ENSG00000137080		curated	TRUE	FALSE	0.001 | 1.0	0.011 | 1.0	0.004 | 1.0	0.003 | 1.0	0.007 | 1.0	0.004 | 1.0	0.003 | 1.0	0.0 | 1.0	0.0 | 1.0	0.0 | 1.0	0.0 | 1.0	0.0 | 1.0	0.0 | 1.0	0.0 | 1.0	0.0 | 1.0	0.0 | 1.0	0.0 | 1.0	0.0 | 1.0	0.004 | 1.0	0.014 | 1.0	0.006 | 1.0	0.004 | 1.0	0.008 | 1.0	0.005 | 1.0	0.004 | 1.0
IFNA6_Type I IFNR	CPI-SC0C1B5BAA1	simple:P05013	complex:Type I IFNR	ENSG00000120235		curated	TRUE	FALSE	0.001 | 1.0	0.011 | 1.0	0.004 | 1.0	0.003 | 1.0	0.007 | 1.0	0.004 | 1.0	0.003 | 1.0	0.0 | 1.0	0.0 | 1.0	0.0 | 1.0	0.0 | 1.0	0.0 | 1.0	0.0 | 1.0	0.0 | 1.0	0.0 | 1.0	0.0 | 1.0	0.0 | 1.0	0.0 | 1.0	0.004 | 1.0	0.014 | 1.0	0.006 | 1.0	0.004 | 1.0	0.008 | 1.0	0.005 | 1.0	0.004 | 1.0
IFNA7_Type I IFNR	CPI-SC0B6162857	simple:P01567	complex:Type I IFNR	ENSG00000214042		curated	TRUE	FALSE	0.001 | 1.0	0.011 | 1.0	0.004 | 1.0	0.003 | 1.0	0.007 | 1.0	0.004 | 1.0	0.003 | 1.0	0.0 | 1.0	0.0 | 1.0	0.0 | 1.0	0.0 | 1.0	0.0 | 1.0	0.0 | 1.0	0.0 | 1.0	0.0 | 1.0	0.0 | 1.0	0.0 | 1.0	0.0 | 1.0	0.004 | 1.0	0.014 | 1.0	0.006 | 1.0	0.004 | 1.0	0.008 | 1.0	0.005 | 1.0	0.004 | 1.0
IFNA10_Type I IFNR	CPI-SC077EB8064	simple:P01566	complex:Type I IFNR	ENSG00000186803		curated	TRUE	FALSE	0.001 | 1.0	0.011 | 1.0	0.004 | 1.0	0.003 | 1.0	0.007 | 1.0	0.004 | 1.0	0.003 | 1.0	0.0 | 1.0	0.0 | 1.0	0.0 | 1.0	0.0 | 1.0	0.0 | 1.0	0.0 | 1.0	0.0 | 1.0	0.0 | 1.0	0.0 | 1.0	0.0 | 1.0	0.0 | 1.0	0.004 | 1.0	0.014 | 1.0	0.006 | 1.0	0.004 | 1.0	0.008 | 1.0	0.005 | 1.0	0.004 | 1.0
IFNA17_Type I IFNR	CPI-SC07A2679B1	simple:P01571	complex:Type I IFNR	ENSG00000234829		curated	TRUE	FALSE	0.001 | 1.0	0.011 | 1.0	0.004 | 1.0	0.003 | 1.0	0.007 | 1.0	0.004 | 1.0	0.003 | 1.0	0.0 | 1.0	0.0 | 1.0	0.0 | 1.0	0.0 | 1.0	0.0 | 1.0	0.0 | 1.0	0.0 | 1.0	0.0 | 1.0	0.0 | 1.0	0.0 | 1.0	0.0 | 1.0	0.004 | 1.0	0.014 | 1.0	0.006 | 1.0	0.004 | 1.0	0.008 | 1.0	0.005 | 1.0	0.004 | 1.0
IL36 receptor_IL1F10	CPI-CS04C628758	complex:IL36 receptor	simple:Q8WWZ1		ENSG00000136697	curated	TRUE	FALSE	0.0 | 1.0	0.0 | 1.0	0.0 | 1.0	0.002 | 1.0	0.0 | 1.0	0.003 | 1.0	0.0 | 1.0	0.002 | 1.0	0.0 | 1.0	0.003 | 1.0	0.0 | 1.0	0.0 | 1.0	0.0 | 1.0	0.0 | 1.0	0.002 | 1.0	0.0 | 1.0	0.003 | 1.0	0.0 | 1.0	0.0 | 1.0	0.0 | 1.0	0.0 | 1.0	0.002 | 1.0	0.0 | 1.0	0.003 | 1.0	0.0 | 1.0
IL36 receptor_IL36G	CPI-CS0D9B5AB86	complex:IL36 receptor	simple:Q9NZH8		ENSG00000136688	curated	TRUE	FALSE	0.0 | 1.0	0.007 | 1.0	0.0 | 1.0	0.002 | 1.0	0.0 | 1.0	0.0 | 1.0	0.0 | 1.0	0.002 | 1.0	0.0 | 1.0	0.0 | 1.0	0.0 | 1.0	0.0 | 1.0	0.0 | 1.0	0.0 | 1.0	0.002 | 1.0	0.0 | 1.0	0.0 | 1.0	0.0 | 1.0	0.0 | 1.0	0.005 | 1.0	0.0 | 1.0	0.002 | 1.0	0.0 | 1.0	0.0 | 1.0	0.0 | 1.0
IL36 receptor_IL36RN	CPI-CS04BB8F1EC	complex:IL36 receptor	simple:Q9UBH0		ENSG00000136695	curated	TRUE	FALSE	0.026 | 1.0	0.117 | 1.0	0.015 | 1.0	0.008 | 1.0	0.129 | 1.0	0.011 | 1.0	0.007 | 1.0	0.008 | 1.0	0.129 | 1.0	0.011 | 1.0	0.007 | 1.0	0.0 | 1.0	0.0 | 1.0	0.0 | 1.0	0.008 | 1.0	0.129 | 1.0	0.011 | 1.0	0.007 | 1.0	0.024 | 1.0	0.115 | 1.0	0.014 | 1.0	0.008 | 1.0	0.13 | 1.0	0.011 | 1.0	0.008 | 1.0
IL36 receptor_IL36A	CPI-CS0F6472748	complex:IL36 receptor	simple:Q9UHA7		ENSG00000136694	curated	TRUE	FALSE	0.005 | 1.0	0.023 | 1.0	0.004 | 1.0	0.0 | 1.0	0.012 | 1.0	0.0 | 1.0	0.002 | 1.0	0.0 | 1.0	0.012 | 1.0	0.0 | 1.0	0.002 | 1.0	0.0 | 1.0	0.0 | 1.0	0.0 | 1.0	0.0 | 1.0	0.012 | 1.0	0.0 | 1.0	0.002 | 1.0	0.003 | 1.0	0.022 | 1.0	0.002 | 1.0	0.0 | 1.0	0.013 | 1.0	0.0 | 1.0	0.002 | 1.0
IL36 receptor_IL36B	CPI-CS0A6AB5149	complex:IL36 receptor	simple:Q9NZH7		ENSG00000136696	curated	TRUE	FALSE	0.0 | 1.0	0.0 | 1.0	0.0 | 1.0	0.0 | 1.0	0.003 | 1.0	0.0 | 1.0	0.0 | 1.0	0.0 | 1.0	0.003 | 1.0	0.0 | 1.0	0.0 | 1.0	0.0 | 1.0	0.0 | 1.0	0.0 | 1.0	0.0 | 1.0	0.003 | 1.0	0.0 | 1.0	0.0 | 1.0	0.0 | 1.0	0.0 | 1.0	0.0 | 1.0	0.0 | 1.0	0.003 | 1.0	0.0 | 1.0	0.0 | 1.0
IL17 receptor AC_IL17A	CPI-CS04F158618	complex:IL17 receptor AC	simple:Q16552		ENSG00000112115	curated	TRUE	FALSE	0.009 | 1.0	0.0 | 1.0	0.01 | 1.0	0.012 | 1.0	0.0 | 1.0	0.013 | 1.0	0.012 | 1.0	0.018 | 1.0	0.0 | 1.0	0.019 | 1.0	0.018 | 1.0	0.009 | 1.0	0.0 | 1.0	0.009 | 1.0	0.012 | 1.0	0.0 | 1.0	0.013 | 1.0	0.012 | 1.0	0.008 | 1.0	0.0 | 1.0	0.008 | 1.0	0.007 | 1.0	0.0 | 1.0	0.008 | 1.0	0.007 | 1.0
IL17 receptor AC_IL17F	CPI-CS0558AB6A5	complex:IL17 receptor AC	simple:Q96PD4		ENSG00000112116	curated	TRUE	FALSE	0.0 | 1.0	0.0 | 1.0	0.0 | 1.0	0.0 | 1.0	0.012 | 1.0	0.0 | 1.0	0.0 | 1.0	0.0 | 1.0	0.018 | 1.0	0.0 | 1.0	0.0 | 1.0	0.0 | 1.0	0.0 | 1.0	0.0 | 1.0	0.0 | 1.0	0.012 | 1.0	0.0 | 1.0	0.0 | 1.0	0.0 | 1.0	0.0 | 1.0	0.0 | 1.0	0.0 | 1.0	0.008 | 1.0	0.0 | 1.0	0.0 | 1.0
IL13 receptor_IL4	CPI-CS00BF6CD40	complex:IL13 receptor	simple:P05112		ENSG00000113520	curated	TRUE	FALSE	0.0 | 1.0	0.03 | 1.0	0.0 | 1.0	0.0 | 1.0	0.0 | 1.0	0.0 | 1.0	0.019 | 1.0	0.0 | 1.0	0.0 | 1.0	0.0 | 1.0	0.018 | 1.0	0.0 | 1.0	0.023 | 1.0	0.0 | 1.0	0.0 | 1.0	0.0 | 1.0	0.0 | 1.0	0.081 | 1.0	0.0 | 1.0	0.068 | 1.0	0.0 | 1.0	0.0 | 1.0	0.0 | 1.0	0.0 | 1.0	0.009 | 1.0
BMPR1B_BMPR2_BMPR1A	CPI-CS0569B9B91	complex:BMPR1B_BMPR2	simple:P36894		ENSG00000107779	curated	FALSE	FALSE	0.045 | 1.0	0.034 | 1.0	0.019 | 1.0	0.0 | 1.0	0.0 | 1.0	0.0 | 1.0	0.0 | 1.0	0.037 | 1.0	0.047 | 1.0	0.033 | 1.0	0.026 | 1.0	0.065 | 1.0	0.054 | 1.0	0.04 | 1.0	0.033 | 1.0	0.043 | 1.0	0.028 | 1.0	0.021 | 1.0	0.0 | 1.0	0.0 | 1.0	0.0 | 1.0	0.033 | 1.0	0.043 | 1.0	0.028 | 1.0	0.021 | 1.0
Type I IFNR_IFNA2	CPI-CS00EB56813	complex:Type I IFNR	simple:P01563		ENSG00000188379	curated	TRUE	FALSE	0.001 | 1.0	0.0 | 1.0	0.004 | 1.0	0.003 | 1.0	0.0 | 1.0	0.0 | 1.0	0.004 | 1.0	0.007 | 1.0	0.0 | 1.0	0.0 | 1.0	0.008 | 1.0	0.011 | 1.0	0.0 | 1.0	0.014 | 1.0	0.004 | 1.0	0.0 | 1.0	0.0 | 1.0	0.005 | 1.0	0.004 | 1.0	0.0 | 1.0	0.006 | 1.0	0.003 | 1.0	0.0 | 1.0	0.0 | 1.0	0.004 | 1.0
IL17 receptor AE_IL17C	CPI-CS0BA342294	complex:IL17 receptor AE	simple:Q9P0M4		ENSG00000124391	curated	TRUE	FALSE	0.005 | 1.0	0.0 | 1.0	0.0 | 1.0	0.0 | 1.0	0.0 | 1.0	0.004 | 1.0	0.0 | 1.0	0.0 | 1.0	0.0 | 1.0	0.037 | 1.0	0.0 | 1.0	0.038 | 1.0	0.0 | 1.0	0.0 | 1.0	0.0 | 1.0	0.0 | 1.0	0.002 | 1.0	0.0 | 1.0	0.006 | 1.0	0.0 | 1.0	0.0 | 1.0	0.0 | 1.0	0.0 | 1.0	0.005 | 1.0	0.0 | 1.0
IL17 receptor AB_IL25	CPI-CS045D41398	complex:IL17 receptor AB	simple:Q9H293		ENSG00000166090	curated	TRUE	FALSE	0.005 | 1.0	0.0 | 1.0	0.0 | 1.0	0.0 | 1.0	0.004 | 1.0	0.005 | 1.0	0.0 | 1.0	0.0 | 1.0	0.092 | 1.0	0.093 | 1.0	0.0 | 1.0	0.075 | 1.0	0.0 | 1.0	0.0 | 1.0	0.0 | 1.0	0.0 | 1.0	0.0 | 1.0	0.0 | 1.0	0.004 | 1.0	0.0 | 1.0	0.0 | 1.0	0.0 | 1.0	0.003 | 1.0	0.004 | 1.0	0.0 | 1.0
CD94:NKG2A_HLAE_HUMAN	CPI-CS0715DE78D	complex:CD94:NKG2A	simple:P13747		ENSG00000204592	curated	FALSE	FALSE	0.048 | 1.0	0.254 | 1.0	0.052 | 1.0	0.049 | 1.0	0.347 | 1.0	0.055 | 1.0	0.042 | 1.0	0.05 | 1.0	0.347 | 1.0	0.055 | 1.0	0.042 | 1.0	0.049 | 1.0	0.255 | 1.0	0.053 | 1.0	0.049 | 1.0	0.346 | 1.0	0.055 | 1.0	0.041 | 1.0	0.047 | 1.0	0.253 | 1.0	0.051 | 1.0	0.05 | 1.0	0.347 | 1.0	0.055 | 1.0	0.042 | 1.0
CD94:NKG2C_HLAE_HUMAN	CPI-CS05AB368CE	complex:CD94:NKG2C	simple:P13747		ENSG00000204592	curated	FALSE	FALSE	0.048 | 1.0	0.254 | 1.0	0.052 | 1.0	0.049 | 1.0	0.347 | 1.0	0.055 | 1.0	0.042 | 1.0	0.05 | 1.0	0.347 | 1.0	0.055 | 1.0	0.042 | 1.0	0.049 | 1.0	0.255 | 1.0	0.053 | 1.0	0.049 | 1.0	0.346 | 1.0	0.055 | 1.0	0.041 | 1.0	0.047 | 1.0	0.253 | 1.0	0.051 | 1.0	0.05 | 1.0	0.347 | 1.0	0.055 | 1.0	0.042 | 1.0
CD94:NKG2E_HLAE_HUMAN	CPI-CS0023FA839	complex:CD94:NKG2E	simple:P13747		ENSG00000204592	curated	FALSE	FALSE	0.048 | 1.0	0.254 | 1.0	0.052 | 1.0	0.049 | 1.0	0.347 | 1.0	0.055 | 1.0	0.042 | 1.0	0.05 | 1.0	0.347 | 1.0	0.055 | 1.0	0.042 | 1.0	0.049 | 1.0	0.255 | 1.0	0.053 | 1.0	0.049 | 1.0	0.346 | 1.0	0.055 | 1.0	0.041 | 1.0	0.047 | 1.0	0.253 | 1.0	0.051 | 1.0	0.05 | 1.0	0.347 | 1.0	0.055 | 1.0	0.042 | 1.0
SEMA3A_PlexinA1_complex3	CPI-SC0C8A5C197	simple:Q14563	complex:PlexinA1_complex3	ENSG00000075213		curated	TRUE	FALSE	0.028 | 1.0	0.064 | 1.0	0.047 | 1.0	0.048 | 1.0	0.075 | 1.0	0.037 | 1.0	0.03 | 1.0	0.0 | 1.0	0.0 | 1.0	0.0 | 1.0	0.0 | 1.0	0.026 | 1.0	0.062 | 1.0	0.045 | 1.0	0.051 | 1.0	0.078 | 1.0	0.04 | 1.0	0.033 | 1.0	0.026 | 1.0	0.062 | 1.0	0.045 | 1.0	0.049 | 1.0	0.076 | 1.0	0.038 | 1.0	0.031 | 1.0
SEMA3A_PlexinA2_complex1	CPI-SC019D0A439	simple:Q14563	complex:PlexinA2_complex1	ENSG00000075213		curated	TRUE	FALSE	0.066 | 1.0	0.018 | 1.0	0.04 | 1.0	0.013 | 1.0	0.006 | 1.0	0.061 | 1.0	0.018 | 1.0	0.0 | 1.0	0.0 | 1.0	0.0 | 1.0	0.0 | 1.0	0.065 | 1.0	0.017 | 1.0	0.039 | 1.0	0.016 | 1.0	0.009 | 1.0	0.064 | 1.0	0.021 | 1.0	0.065 | 1.0	0.017 | 1.0	0.039 | 1.0	0.014 | 1.0	0.007 | 1.0	0.062 | 1.0	0.019 | 1.0
SEMA3A_PlexinA3_complex1	CPI-SC05F339947	simple:Q14563	complex:PlexinA3_complex1	ENSG00000075213		curated	TRUE	FALSE	0.024 | 1.0	0.037 | 1.0	0.033 | 1.0	0.012 | 1.0	0.023 | 1.0	0.023 | 1.0	0.017 | 1.0	0.0 | 1.0	0.0 | 1.0	0.0 | 1.0	0.0 | 1.0	0.022 | 1.0	0.035 | 1.0	0.031 | 1.0	0.015 | 1.0	0.026 | 1.0	0.027 | 1.0	0.02 | 1.0	0.022 | 1.0	0.035 | 1.0	0.031 | 1.0	0.013 | 1.0	0.024 | 1.0	0.024 | 1.0	0.018 | 1.0
SEMA3A_PlexinA4_complex1	CPI-SC096905331	simple:Q14563	complex:PlexinA4_complex1	ENSG00000075213		curated	TRUE	FALSE	0.006 | 1.0	0.008 | 1.0	0.0 | 1.0	0.001 | 1.0	0.002 | 1.0	0.001 | 1.0	0.001 | 1.0	0.0 | 1.0	0.0 | 1.0	0.0 | 1.0	0.0 | 1.0	0.004 | 1.0	0.006 | 1.0	0.0 | 1.0	0.005 | 1.0	0.005 | 1.0	0.004 | 1.0	0.004 | 1.0	0.004 | 1.0	0.006 | 1.0	0.0 | 1.0	0.002 | 1.0	0.003 | 1.0	0.002 | 1.0	0.002 | 1.0
SEMA6D_PlexinA1_complex1	CPI-SC03CCAAB4B	simple:Q8NFY4	complex:PlexinA1_complex1	ENSG00000137872		curated	FALSE	FALSE	0.094 | 1.0	0.13 | 1.0	0.113 | 1.0	0.063 | 1.0	0.091 | 1.0	0.053 | 1.0	0.046 | 1.0	0.056 | 1.0	0.084 | 1.0	0.046 | 1.0	0.039 | 1.0	0.045 | 1.0	0.081 | 1.0	0.064 | 1.0	0.099 | 1.0	0.127 | 1.0	0.089 | 1.0	0.082 | 1.0	0.148 | 1.0	0.184 | 0.0	0.167 | 1.0	0.096 | 1.0	0.124 | 1.0	0.086 | 1.0	0.079 | 1.0
SEMA6D_PlexinA1_complex2	CPI-SC0E3C606DB	simple:Q8NFY4	complex:PlexinA1_complex2	ENSG00000137872		curated	FALSE	FALSE	0.071 | 1.0	0.0 | 1.0	0.072 | 1.0	0.017 | 1.0	0.0 | 1.0	0.0 | 1.0	0.017 | 1.0	0.01 | 1.0	0.0 | 1.0	0.0 | 1.0	0.01 | 1.0	0.021 | 1.0	0.0 | 1.0	0.023 | 1.0	0.053 | 1.0	0.0 | 1.0	0.0 | 1.0	0.053 | 1.0	0.125 | 1.0	0.0 | 1.0	0.126 | 1.0	0.05 | 1.0	0.0 | 1.0	0.0 | 1.0	0.05 | 1.0
ACVR_1B2B receptor_INHBA	CPI-CS0C159B54D	complex:ACVR_1B2B receptor	simple:P08476		ENSG00000122641	curated	TRUE	FALSE	0.025 | 1.0	0.009 | 1.0	0.007 | 1.0	0.011 | 1.0	0.002 | 1.0	0.009 | 1.0	0.006 | 1.0	0.022 | 1.0	0.013 | 1.0	0.02 | 1.0	0.017 | 1.0	0.024 | 1.0	0.008 | 1.0	0.006 | 1.0	0.011 | 1.0	0.001 | 1.0	0.009 | 1.0	0.005 | 1.0	0.0 | 1.0	0.0 | 1.0	0.0 | 1.0	0.011 | 1.0	0.002 | 1.0	0.009 | 1.0	0.005 | 1.0
ACVR_1B2A receptor_INHBA	CPI-CS0533A30DC	complex:ACVR_1B2A receptor	simple:P08476		ENSG00000122641	curated	TRUE	FALSE	0.027 | 1.0	0.011 | 1.0	0.009 | 1.0	0.018 | 1.0	0.009 | 1.0	0.016 | 1.0	0.012 | 1.0	0.032 | 1.0	0.023 | 1.0	0.03 | 1.0	0.027 | 1.0	0.037 | 1.0	0.021 | 1.0	0.019 | 1.0	0.016 | 1.0	0.007 | 1.0	0.014 | 1.0	0.011 | 1.0	0.024 | 1.0	0.008 | 1.0	0.006 | 1.0	0.013 | 1.0	0.004 | 1.0	0.011 | 1.0	0.008 | 1.0
ACVR_1A2A receptor_INHBA	CPI-CS091BF99D0	complex:ACVR_1A2A receptor	simple:P08476		ENSG00000122641	curated	TRUE	FALSE	0.027 | 1.0	0.011 | 1.0	0.009 | 1.0	0.018 | 1.0	0.009 | 1.0	0.016 | 1.0	0.012 | 1.0	0.032 | 1.0	0.023 | 1.0	0.03 | 1.0	0.027 | 1.0	0.037 | 1.0	0.021 | 1.0	0.019 | 1.0	0.016 | 1.0	0.007 | 1.0	0.014 | 1.0	0.011 | 1.0	0.024 | 1.0	0.008 | 1.0	0.006 | 1.0	0.013 | 1.0	0.004 | 1.0	0.011 | 1.0	0.008 | 1.0
ACVR_1A2B receptor_INHBA	CPI-CS04DD927C9	complex:ACVR_1A2B receptor	simple:P08476		ENSG00000122641	curated	TRUE	FALSE	0.025 | 1.0	0.009 | 1.0	0.007 | 1.0	0.011 | 1.0	0.002 | 1.0	0.009 | 1.0	0.006 | 1.0	0.022 | 1.0	0.013 | 1.0	0.02 | 1.0	0.017 | 1.0	0.024 | 1.0	0.008 | 1.0	0.006 | 1.0	0.011 | 1.0	0.001 | 1.0	0.009 | 1.0	0.005 | 1.0	0.0 | 1.0	0.0 | 1.0	0.0 | 1.0	0.011 | 1.0	0.002 | 1.0	0.009 | 1.0	0.005 | 1.0
ACVR_1B2B receptor_INHBB	CPI-CS085EF890A	complex:ACVR_1B2B receptor	simple:P09529		ENSG00000163083	curated	TRUE	FALSE	0.007 | 1.0	0.015 | 1.0	0.02 | 1.0	0.004 | 1.0	0.004 | 1.0	0.01 | 1.0	0.023 | 1.0	0.015 | 1.0	0.015 | 1.0	0.022 | 1.0	0.035 | 1.0	0.006 | 1.0	0.015 | 1.0	0.019 | 1.0	0.004 | 1.0	0.004 | 1.0	0.01 | 1.0	0.023 | 1.0	0.0 | 1.0	0.0 | 1.0	0.0 | 1.0	0.004 | 1.0	0.004 | 1.0	0.01 | 1.0	0.023 | 1.0
ACVR_1B2A receptor_INHBB	CPI-CS02899BF8B	complex:ACVR_1B2A receptor	simple:P09529		ENSG00000163083	curated	TRUE	FALSE	0.009 | 1.0	0.017 | 1.0	0.021 | 1.0	0.011 | 1.0	0.011 | 1.0	0.017 | 1.0	0.03 | 1.0	0.025 | 1.0	0.025 | 1.0	0.031 | 1.0	0.045 | 1.0	0.019 | 1.0	0.027 | 1.0	0.031 | 1.0	0.01 | 1.0	0.01 | 1.0	0.016 | 1.0	0.029 | 1.0	0.006 | 1.0	0.015 | 1.0	0.019 | 1.0	0.007 | 1.0	0.006 | 1.0	0.013 | 1.0	0.026 | 1.0
ACVR_1A2A receptor_INHBB	CPI-CS073233FCC	complex:ACVR_1A2A receptor	simple:P09529		ENSG00000163083	curated	TRUE	FALSE	0.009 | 1.0	0.017 | 1.0	0.021 | 1.0	0.011 | 1.0	0.011 | 1.0	0.017 | 1.0	0.03 | 1.0	0.025 | 1.0	0.025 | 1.0	0.031 | 1.0	0.045 | 1.0	0.019 | 1.0	0.027 | 1.0	0.031 | 1.0	0.01 | 1.0	0.01 | 1.0	0.016 | 1.0	0.029 | 1.0	0.006 | 1.0	0.015 | 1.0	0.019 | 1.0	0.007 | 1.0	0.006 | 1.0	0.013 | 1.0	0.026 | 1.0
ACVR_1A2B receptor_INHBB	CPI-CS048465560	complex:ACVR_1A2B receptor	simple:P09529		ENSG00000163083	curated	TRUE	FALSE	0.007 | 1.0	0.015 | 1.0	0.02 | 1.0	0.004 | 1.0	0.004 | 1.0	0.01 | 1.0	0.023 | 1.0	0.015 | 1.0	0.015 | 1.0	0.022 | 1.0	0.035 | 1.0	0.006 | 1.0	0.015 | 1.0	0.019 | 1.0	0.004 | 1.0	0.004 | 1.0	0.01 | 1.0	0.023 | 1.0	0.0 | 1.0	0.0 | 1.0	0.0 | 1.0	0.004 | 1.0	0.004 | 1.0	0.01 | 1.0	0.023 | 1.0
AMH_MIS receptor 1	CPI-SC0FD4A1277	simple:P03971	complex:MIS receptor 1	ENSG00000104899		curated	TRUE	FALSE	0.0 | 1.0	0.0 | 1.0	0.0 | 1.0	0.034 | 1.0	0.043 | 1.0	0.029 | 1.0	0.022 | 1.0	0.0 | 1.0	0.0 | 1.0	0.0 | 1.0	0.0 | 1.0	0.0 | 1.0	0.0 | 1.0	0.0 | 1.0	0.0 | 1.0	0.0 | 1.0	0.0 | 1.0	0.0 | 1.0	0.0 | 1.0	0.0 | 1.0	0.0 | 1.0	0.033 | 1.0	0.042 | 1.0	0.028 | 1.0	0.021 | 1.0
AMH_MIS receptor 3	CPI-SC02CDFD48B	simple:P03971	complex:MIS receptor 3	ENSG00000104899		curated	TRUE	FALSE	0.0 | 1.0	0.0 | 1.0	0.0 | 1.0	0.082 | 1.0	0.011 | 1.0	0.013 | 1.0	0.022 | 1.0	0.0 | 1.0	0.0 | 1.0	0.0 | 1.0	0.0 | 1.0	0.0 | 1.0	0.0 | 1.0	0.0 | 1.0	0.0 | 1.0	0.0 | 1.0	0.0 | 1.0	0.0 | 1.0	0.0 | 1.0	0.0 | 1.0	0.0 | 1.0	0.081 | 1.0	0.01 | 1.0	0.012 | 1.0	0.021 | 1.0
NRTN_RET receptor 2	CPI-SC001AFA16D	simple:Q99748	complex:RET receptor 2	ENSG00000171119		curated	TRUE	FALSE	0.005 | 1.0	0.0 | 1.0	0.005 | 1.0	0.006 | 1.0	0.004 | 1.0	0.005 | 1.0	0.005 | 1.0	0.023 | 1.0	0.021 | 1.0	0.022 | 1.0	0.022 | 1.0	0.026 | 1.0	0.0 | 1.0	0.026 | 1.0	0.008 | 1.0	0.006 | 1.0	0.007 | 1.0	0.007 | 1.0	0.01 | 1.0	0.0 | 1.0	0.009 | 1.0	0.004 | 1.0	0.002 | 1.0	0.004 | 1.0	0.003 | 1.0

## Sheet: pvalues_means
interacting_pair	id_cp_interaction	partner_a	partner_b	ensembl_a	ensembl_b	source	secreted	is_integrin	MISR2+_progenitor_Yes_MISR2+_progenitor_Yes	MISR2+_progenitor_Yes_inner_stroma_No	MISR2+_progenitor_Yes_luminal_epithelium_No	MISR2+_progenitor_Yes_luminal_epithelium_Yes	MISR2+_progenitor_Yes_myometrium_No	MISR2+_progenitor_Yes_myometrium_Yes	MISR2+_progenitor_Yes_outer_stroma_No	inner_stroma_No_MISR2+_progenitor_Yes	inner_stroma_No_inner_stroma_No	inner_stroma_No_luminal_epithelium_No	inner_stroma_No_luminal_epithelium_Yes	inner_stroma_No_myometrium_No	inner_stroma_No_myometrium_Yes	inner_stroma_No_outer_stroma_No	luminal_epithelium_No_MISR2+_progenitor_Yes	luminal_epithelium_No_inner_stroma_No	luminal_epithelium_No_luminal_epithelium_No	luminal_epithelium_No_luminal_epithelium_Yes	luminal_epithelium_No_myometrium_No	luminal_epithelium_No_myometrium_Yes	luminal_epithelium_No_outer_stroma_No	luminal_epithelium_Yes_MISR2+_progenitor_Yes	luminal_epithelium_Yes_inner_stroma_No	luminal_epithelium_Yes_luminal_epithelium_No	luminal_epithelium_Yes_luminal_epithelium_Yes	luminal_epithelium_Yes_myometrium_No	luminal_epithelium_Yes_myometrium_Yes	luminal_epithelium_Yes_outer_stroma_No	myometrium_No_MISR2+_progenitor_Yes	myometrium_No_inner_stroma_No	myometrium_No_luminal_epithelium_No	myometrium_No_luminal_epithelium_Yes	myometrium_No_myometrium_No	myometrium_No_myometrium_Yes	myometrium_No_outer_stroma_No	myometrium_Yes_MISR2+_progenitor_Yes	myometrium_Yes_inner_stroma_No	myometrium_Yes_luminal_epithelium_No	myometrium_Yes_luminal_epithelium_Yes	myometrium_Yes_myometrium_No	myometrium_Yes_myometrium_Yes
CXCL12_ACKR3	CPI-SS0976BA7F0	simple:P48061	simple:P25106	ENSG00000107562	ENSG00000144476	guidetopharmacology.org	TRUE	FALSE	0.035 | 1.0	0.104 | 1.0	0.073 | 1.0	0.046 | 1.0	0.053 | 1.0	0.07 | 1.0	0.111 | 1.0	0.025 | 1.0	0.093 | 1.0	0.062 | 1.0	0.035 | 1.0	0.042 | 1.0	0.059 | 1.0	0.101 | 1.0	0.03 | 1.0	0.098 | 1.0	0.067 | 1.0	0.04 | 1.0	0.047 | 1.0	0.064 | 1.0	0.105 | 1.0	0.031 | 1.0	0.099 | 1.0	0.068 | 1.0	0.041 | 1.0	0.049 | 1.0	0.066 | 1.0	0.107 | 1.0	0.576 | 1.0	0.645 | 0.0	0.614 | 1.0	0.587 | 1.0	0.594 | 1.0	0.611 | 1.0	0.652 | 0.0	0.581 | 1.0	0.65 | 0.0	0.619 | 1.0	0.592 | 1.0	0.599 | 1.0	0.616 | 1.0
CXCL11_ACKR3	CPI-SS0747FCACD	simple:O14625	simple:P25106	ENSG00000169248	ENSG00000144476	guidetopharmacology.org	TRUE	FALSE	0.007 | 1.0	0.076 | 1.0	0.044 | 1.0	0.018 | 1.0	0.025 | 1.0	0.042 | 1.0	0.083 | 1.0	0.007 | 1.0	0.075 | 1.0	0.044 | 1.0	0.018 | 1.0	0.025 | 1.0	0.042 | 1.0	0.083 | 1.0	0.0 | 1.0	0.0 | 1.0	0.0 | 1.0	0.0 | 1.0	0.0 | 1.0	0.0 | 1.0	0.0 | 1.0	0.008 | 1.0	0.077 | 1.0	0.045 | 1.0	0.019 | 1.0	0.026 | 1.0	0.043 | 1.0	0.084 | 1.0	0.0 | 1.0	0.0 | 1.0	0.0 | 1.0	0.0 | 1.0	0.0 | 1.0	0.0 | 1.0	0.0 | 1.0	0.0 | 1.0	0.0 | 1.0	0.0 | 1.0	0.0 | 1.0	0.0 | 1.0	0.0 | 1.0
CXCL12_CXCR3	CPI-SS0EFE0B07A	simple:P48061	simple:P49682	ENSG00000107562	ENSG00000186810	guidetopharmacology.org	TRUE	FALSE	0.033 | 1.0	0.0 | 1.0	0.0 | 1.0	0.031 | 1.0	0.031 | 1.0	0.03 | 1.0	0.0 | 1.0	0.022 | 1.0	0.0 | 1.0	0.0 | 1.0	0.021 | 1.0	0.02 | 1.0	0.02 | 1.0	0.0 | 1.0	0.027 | 1.0	0.0 | 1.0	0.0 | 1.0	0.026 | 1.0	0.025 | 1.0	0.025 | 1.0	0.0 | 1.0	0.028 | 1.0	0.0 | 1.0	0.0 | 1.0	0.027 | 1.0	0.026 | 1.0	0.026 | 1.0	0.0 | 1.0	0.574 | 1.0	0.0 | 1.0	0.0 | 1.0	0.572 | 1.0	0.572 | 1.0	0.571 | 1.0	0.0 | 1.0	0.578 | 1.0	0.0 | 1.0	0.0 | 1.0	0.577 | 1.0	0.577 | 1.0	0.576 | 1.0
CXCL11_CXCR3	CPI-SS09FAC4977	simple:O14625	simple:P49682	ENSG00000169248	ENSG00000186810	curated	TRUE	FALSE	0.004 | 1.0	0.0 | 1.0	0.0 | 1.0	0.003 | 1.0	0.003 | 1.0	0.002 | 1.0	0.0 | 1.0	0.004 | 1.0	0.0 | 1.0	0.0 | 1.0	0.003 | 1.0	0.002 | 1.0	0.002 | 1.0	0.0 | 1.0	0.0 | 1.0	0.0 | 1.0	0.0 | 1.0	0.0 | 1.0	0.0 | 1.0	0.0 | 1.0	0.0 | 1.0	0.005 | 1.0	0.0 | 1.0	0.0 | 1.0	0.004 | 1.0	0.004 | 1.0	0.003 | 1.0	0.0 | 1.0	0.0 | 1.0	0.0 | 1.0	0.0 | 1.0	0.0 | 1.0	0.0 | 1.0	0.0 | 1.0	0.0 | 1.0	0.0 | 1.0	0.0 | 1.0	0.0 | 1.0	0.0 | 1.0	0.0 | 1.0	0.0 | 1.0
CCL19_CXCR3	CPI-SS07B005E6A	simple:Q99731	simple:P49682	ENSG00000172724	ENSG00000186810	guidetopharmacology.org	TRUE	FALSE	0.0 | 1.0	0.0 | 1.0	0.0 | 1.0	0.0 | 1.0	0.0 | 1.0	0.0 | 1.0	0.0 | 1.0	0.004 | 1.0	0.0 | 1.0	0.0 | 1.0	0.003 | 1.0	0.002 | 1.0	0.002 | 1.0	0.0 | 1.0	0.0 | 1.0	0.0 | 1.0	0.0 | 1.0	0.0 | 1.0	0.0 | 1.0	0.0 | 1.0	0.0 | 1.0	0.0 | 1.0	0.0 | 1.0	0.0 | 1.0	0.0 | 1.0	0.0 | 1.0	0.0 | 1.0	0.0 | 1.0	0.012 | 1.0	0.0 | 1.0	0.0 | 1.0	0.011 | 1.0	0.01 | 1.0	0.01 | 1.0	0.0 | 1.0	0.0 | 1.0	0.0 | 1.0	0.0 | 1.0	0.0 | 1.0	0.0 | 1.0	0.0 | 1.0
CXCL10_CXCR3	CPI-SS080683E15	simple:P02778	simple:P49682	ENSG00000169245	ENSG00000186810	curated	TRUE	FALSE	0.011 | 1.0	0.0 | 1.0	0.0 | 1.0	0.01 | 1.0	0.01 | 1.0	0.009 | 1.0	0.0 | 1.0	0.033 | 1.0	0.0 | 1.0	0.0 | 1.0	0.031 | 1.0	0.031 | 1.0	0.03 | 1.0	0.0 | 1.0	0.028 | 1.0	0.0 | 1.0	0.0 | 1.0	0.027 | 1.0	0.027 | 1.0	0.026 | 1.0	0.0 | 1.0	0.039 | 1.0	0.0 | 1.0	0.0 | 1.0	0.037 | 1.0	0.037 | 1.0	0.036 | 1.0	0.0 | 1.0	0.132 | 1.0	0.0 | 1.0	0.0 | 1.0	0.131 | 1.0	0.131 | 1.0	0.13 | 1.0	0.0 | 1.0	0.052 | 1.0	0.0 | 1.0	0.0 | 1.0	0.051 | 1.0	0.05 | 1.0	0.05 | 1.0
CXCL9_CXCR3	CPI-SS09A1EB4B3	simple:Q07325	simple:P49682	ENSG00000138755	ENSG00000186810	curated	TRUE	FALSE	0.004 | 1.0	0.0 | 1.0	0.0 | 1.0	0.003 | 1.0	0.002 | 1.0	0.002 | 1.0	0.0 | 1.0	0.0 | 1.0	0.0 | 1.0	0.0 | 1.0	0.0 | 1.0	0.0 | 1.0	0.0 | 1.0	0.0 | 1.0	0.0 | 1.0	0.0 | 1.0	0.0 | 1.0	0.0 | 1.0	0.0 | 1.0	0.0 | 1.0	0.0 | 1.0	0.0 | 1.0	0.0 | 1.0	0.0 | 1.0	0.0 | 1.0	0.0 | 1.0	0.0 | 1.0	0.0 | 1.0	0.005 | 1.0	0.0 | 1.0	0.0 | 1.0	0.004 | 1.0	0.003 | 1.0	0.002 | 1.0	0.0 | 1.0	0.008 | 1.0	0.0 | 1.0	0.0 | 1.0	0.007 | 1.0	0.007 | 1.0	0.006 | 1.0
CXCL12_CXCR4	CPI-SS0A28DCA72	simple:P48061	simple:P61073	ENSG00000107562	ENSG00000121966	curated	TRUE	FALSE	0.048 | 1.0	0.048 | 1.0	0.035 | 1.0	0.031 | 1.0	0.037 | 1.0	0.032 | 1.0	0.032 | 1.0	0.037 | 1.0	0.037 | 1.0	0.024 | 1.0	0.021 | 1.0	0.026 | 1.0	0.022 | 1.0	0.022 | 1.0	0.042 | 1.0	0.042 | 1.0	0.029 | 1.0	0.026 | 1.0	0.031 | 1.0	0.027 | 1.0	0.027 | 1.0	0.043 | 1.0	0.043 | 1.0	0.03 | 1.0	0.027 | 1.0	0.032 | 1.0	0.028 | 1.0	0.028 | 1.0	0.589 | 1.0	0.588 | 1.0	0.576 | 1.0	0.572 | 1.0	0.577 | 1.0	0.573 | 1.0	0.573 | 1.0	0.594 | 1.0	0.593 | 1.0	0.58 | 1.0	0.577 | 1.0	0.582 | 1.0	0.578 | 1.0
CCL19_CCRL2	CPI-SS0605AC9BF	simple:Q99731	simple:O00421	ENSG00000172724	ENSG00000121797	guidetopharmacology.org	TRUE	FALSE	0.0 | 1.0	0.0 | 1.0	0.0 | 1.0	0.0 | 1.0	0.0 | 1.0	0.0 | 1.0	0.0 | 1.0	0.008 | 1.0	0.005 | 1.0	0.004 | 1.0	0.003 | 1.0	0.003 | 1.0	0.005 | 1.0	0.004 | 1.0	0.0 | 1.0	0.0 | 1.0	0.0 | 1.0	0.0 | 1.0	0.0 | 1.0	0.0 | 1.0	0.0 | 1.0	0.0 | 1.0	0.0 | 1.0	0.0 | 1.0	0.0 | 1.0	0.0 | 1.0	0.0 | 1.0	0.0 | 1.0	0.016 | 1.0	0.013 | 1.0	0.012 | 1.0	0.011 | 1.0	0.011 | 1.0	0.013 | 1.0	0.012 | 1.0	0.0 | 1.0	0.0 | 1.0	0.0 | 1.0	0.0 | 1.0	0.0 | 1.0	0.0 | 1.0
CCL19_ACKR4	CPI-SS00AEC3818	simple:Q99731	simple:Q9NPB9	ENSG00000172724	ENSG00000129048	curated	TRUE	FALSE	0.0 | 1.0	0.0 | 1.0	0.0 | 1.0	0.0 | 1.0	0.0 | 1.0	0.0 | 1.0	0.0 | 1.0	0.003 | 1.0	0.002 | 1.0	0.001 | 1.0	0.003 | 1.0	0.0 | 1.0	0.0 | 1.0	0.002 | 1.0	0.0 | 1.0	0.0 | 1.0	0.0 | 1.0	0.0 | 1.0	0.0 | 1.0	0.0 | 1.0	0.0 | 1.0	0.0 | 1.0	0.0 | 1.0	0.0 | 1.0	0.0 | 1.0	0.0 | 1.0	0.0 | 1.0	0.0 | 1.0	0.011 | 1.0	0.01 | 1.0	0.009 | 1.0	0.011 | 1.0	0.0 | 1.0	0.0 | 1.0	0.01 | 1.0	0.0 | 1.0	0.0 | 1.0	0.0 | 1.0	0.0 | 1.0	0.0 | 1.0	0.0 | 1.0
CCL21_ACKR4	CPI-SS0ECD9BB5E	simple:O00585	simple:Q9NPB9	ENSG00000137077	ENSG00000129048	curated	TRUE	FALSE	0.005 | 1.0	0.004 | 1.0	0.003 | 1.0	0.005 | 1.0	0.0 | 1.0	0.0 | 1.0	0.004 | 1.0	0.012 | 1.0	0.011 | 1.0	0.01 | 1.0	0.011 | 1.0	0.0 | 1.0	0.0 | 1.0	0.01 | 1.0	0.006 | 1.0	0.004 | 1.0	0.004 | 1.0	0.005 | 1.0	0.0 | 1.0	0.0 | 1.0	0.004 | 1.0	0.0 | 1.0	0.0 | 1.0	0.0 | 1.0	0.0 | 1.0	0.0 | 1.0	0.0 | 1.0	0.0 | 1.0	0.011 | 1.0	0.009 | 1.0	0.009 | 1.0	0.01 | 1.0	0.0 | 1.0	0.0 | 1.0	0.009 | 1.0	0.0 | 1.0	0.0 | 1.0	0.0 | 1.0	0.0 | 1.0	0.0 | 1.0	0.0 | 1.0
CXCL13_ACKR4	CPI-SS083B5EBAB	simple:O43927	simple:Q9NPB9	ENSG00000156234	ENSG00000129048	curated	TRUE	FALSE	0.004 | 1.0	0.002 | 1.0	0.002 | 1.0	0.003 | 1.0	0.0 | 1.0	0.0 | 1.0	0.002 | 1.0	0.003 | 1.0	0.002 | 1.0	0.001 | 1.0	0.003 | 1.0	0.0 | 1.0	0.0 | 1.0	0.002 | 1.0	0.007 | 1.0	0.006 | 1.0	0.005 | 1.0	0.007 | 1.0	0.0 | 1.0	0.0 | 1.0	0.006 | 1.0	0.007 | 1.0	0.006 | 1.0	0.005 | 1.0	0.006 | 1.0	0.0 | 1.0	0.0 | 1.0	0.005 | 1.0	0.014 | 1.0	0.013 | 1.0	0.012 | 1.0	0.014 | 1.0	0.0 | 1.0	0.0 | 1.0	0.013 | 1.0	0.015 | 1.0	0.014 | 1.0	0.013 | 1.0	0.015 | 1.0	0.0 | 1.0	0.0 | 1.0
CCL19_CCR7	CPI-SS09239FB26	simple:Q99731	simple:P32248	ENSG00000172724	ENSG00000126353	curated	TRUE	FALSE	0.0 | 1.0	0.0 | 1.0	0.0 | 1.0	0.0 | 1.0	0.0 | 1.0	0.0 | 1.0	0.0 | 1.0	0.001 | 1.0	0.001 | 1.0	0.0 | 1.0	0.0 | 1.0	0.0 | 1.0	0.002 | 1.0	0.001 | 1.0	0.0 | 1.0	0.0 | 1.0	0.0 | 1.0	0.0 | 1.0	0.0 | 1.0	0.0 | 1.0	0.0 | 1.0	0.0 | 1.0	0.0 | 1.0	0.0 | 1.0	0.0 | 1.0	0.0 | 1.0	0.0 | 1.0	0.0 | 1.0	0.009 | 1.0	0.009 | 1.0	0.0 | 1.0	0.0 | 1.0	0.0 | 1.0	0.01 | 1.0	0.009 | 1.0	0.0 | 1.0	0.0 | 1.0	0.0 | 1.0	0.0 | 1.0	0.0 | 1.0	0.0 | 1.0
CCL21_CCR7	CPI-SS06C0074BD	simple:O00585	simple:P32248	ENSG00000137077	ENSG00000126353	curated	TRUE	FALSE	0.003 | 1.0	0.003 | 1.0	0.0 | 1.0	0.0 | 1.0	0.0 | 1.0	0.004 | 1.0	0.003 | 1.0	0.01 | 1.0	0.01 | 1.0	0.0 | 1.0	0.0 | 1.0	0.0 | 1.0	0.01 | 1.0	0.01 | 1.0	0.004 | 1.0	0.004 | 1.0	0.0 | 1.0	0.0 | 1.0	0.0 | 1.0	0.004 | 1.0	0.003 | 1.0	0.0 | 1.0	0.0 | 1.0	0.0 | 1.0	0.0 | 1.0	0.0 | 1.0	0.0 | 1.0	0.0 | 1.0	0.008 | 1.0	0.008 | 1.0	0.0 | 1.0	0.0 | 1.0	0.0 | 1.0	0.009 | 1.0	0.008 | 1.0	0.0 | 1.0	0.0 | 1.0	0.0 | 1.0	0.0 | 1.0	0.0 | 1.0	0.0 | 1.0
CCL11_CCR3	CPI-SS0F33890C0	simple:P51671	simple:P51677	ENSG00000172156	ENSG00000183625	curated	TRUE	FALSE	0.001 | 1.0	0.002 | 1.0	0.001 | 1.0	0.0 | 1.0	0.0 | 1.0	0.0 | 1.0	0.001 | 1.0	0.001 | 1.0	0.002 | 1.0	0.001 | 1.0	0.0 | 1.0	0.0 | 1.0	0.0 | 1.0	0.001 | 1.0	0.0 | 1.0	0.0 | 1.0	0.0 | 1.0	0.0 | 1.0	0.0 | 1.0	0.0 | 1.0	0.0 | 1.0	0.0 | 1.0	0.0 | 1.0	0.0 | 1.0	0.0 | 1.0	0.0 | 1.0	0.0 | 1.0	0.0 | 1.0	0.001 | 1.0	0.002 | 1.0	0.001 | 1.0	0.0 | 1.0	0.0 | 1.0	0.0 | 1.0	0.001 | 1.0	0.005 | 1.0	0.006 | 1.0	0.005 | 1.0	0.0 | 1.0	0.0 | 1.0	0.0 | 1.0
CCL7_CCR3	CPI-SS008CEEAB9	simple:P80098	simple:P51677	ENSG00000108688	ENSG00000183625	curated	TRUE	FALSE	0.003 | 1.0	0.004 | 1.0	0.003 | 1.0	0.0 | 1.0	0.0 | 1.0	0.0 | 1.0	0.003 | 1.0	0.003 | 1.0	0.004 | 1.0	0.004 | 1.0	0.0 | 1.0	0.0 | 1.0	0.0 | 1.0	0.004 | 1.0	0.006 | 1.0	0.007 | 1.0	0.006 | 1.0	0.0 | 1.0	0.0 | 1.0	0.0 | 1.0	0.006 | 1.0	0.005 | 1.0	0.006 | 1.0	0.005 | 1.0	0.0 | 1.0	0.0 | 1.0	0.0 | 1.0	0.005 | 1.0	0.006 | 1.0	0.006 | 1.0	0.006 | 1.0	0.0 | 1.0	0.0 | 1.0	0.0 | 1.0	0.006 | 1.0	0.007 | 1.0	0.008 | 1.0	0.007 | 1.0	0.0 | 1.0	0.0 | 1.0	0.0 | 1.0
CCL8_CCR3	CPI-SS0DF6991A8	simple:P80075	simple:P51677	ENSG00000108700	ENSG00000183625	curated	TRUE	FALSE	0.001 | 1.0	0.002 | 1.0	0.001 | 1.0	0.0 | 1.0	0.0 | 1.0	0.0 | 1.0	0.001 | 1.0	0.001 | 1.0	0.002 | 1.0	0.001 | 1.0	0.0 | 1.0	0.0 | 1.0	0.0 | 1.0	0.001 | 1.0	0.0 | 1.0	0.0 | 1.0	0.0 | 1.0	0.0 | 1.0	0.0 | 1.0	0.0 | 1.0	0.0 | 1.0	0.0 | 1.0	0.0 | 1.0	0.0 | 1.0	0.0 | 1.0	0.0 | 1.0	0.0 | 1.0	0.0 | 1.0	0.0 | 1.0	0.0 | 1.0	0.0 | 1.0	0.0 | 1.0	0.0 | 1.0	0.0 | 1.0	0.0 | 1.0	0.0 | 1.0	0.0 | 1.0	0.0 | 1.0	0.0 | 1.0	0.0 | 1.0	0.0 | 1.0
CCL26_CCR3	CPI-SS01FCCEBB9	simple:Q9Y258	simple:P51677	ENSG00000006606	ENSG00000183625	curated	TRUE	FALSE	0.002 | 1.0	0.002 | 1.0	0.002 | 1.0	0.0 | 1.0	0.0 | 1.0	0.0 | 1.0	0.002 | 1.0	0.001 | 1.0	0.002 | 1.0	0.001 | 1.0	0.0 | 1.0	0.0 | 1.0	0.0 | 1.0	0.001 | 1.0	0.0 | 1.0	0.0 | 1.0	0.0 | 1.0	0.0 | 1.0	0.0 | 1.0	0.0 | 1.0	0.0 | 1.0	0.0 | 1.0	0.0 | 1.0	0.0 | 1.0	0.0 | 1.0	0.0 | 1.0	0.0 | 1.0	0.0 | 1.0	0.001 | 1.0	0.002 | 1.0	0.001 | 1.0	0.0 | 1.0	0.0 | 1.0	0.0 | 1.0	0.001 | 1.0	0.0 | 1.0	0.0 | 1.0	0.0 | 1.0	0.0 | 1.0	0.0 | 1.0	0.0 | 1.0
CCL24_CCR3	CPI-SS0B0AC1603	simple:O00175	simple:P51677	ENSG00000106178	ENSG00000183625	curated	TRUE	FALSE	0.048 | 1.0	0.049 | 1.0	0.049 | 1.0	0.0 | 1.0	0.0 | 1.0	0.0 | 1.0	0.049 | 1.0	0.008 | 1.0	0.009 | 1.0	0.008 | 1.0	0.0 | 1.0	0.0 | 1.0	0.0 | 1.0	0.008 | 1.0	0.021 | 1.0	0.022 | 1.0	0.021 | 1.0	0.0 | 1.0	0.0 | 1.0	0.0 | 1.0	0.021 | 1.0	0.023 | 1.0	0.024 | 1.0	0.024 | 1.0	0.0 | 1.0	0.0 | 1.0	0.0 | 1.0	0.024 | 1.0	0.016 | 1.0	0.017 | 1.0	0.017 | 1.0	0.0 | 1.0	0.0 | 1.0	0.0 | 1.0	0.017 | 1.0	0.027 | 1.0	0.027 | 1.0	0.027 | 1.0	0.0 | 1.0	0.0 | 1.0	0.0 | 1.0
CCL28_CCR3	CPI-SS03B41BCDD	simple:Q9NRJ3	simple:P51677	ENSG00000151882	ENSG00000183625	guidetopharmacology.org	TRUE	FALSE	0.007 | 1.0	0.007 | 1.0	0.007 | 1.0	0.0 | 1.0	0.0 | 1.0	0.0 | 1.0	0.007 | 1.0	0.004 | 1.0	0.005 | 1.0	0.004 | 1.0	0.0 | 1.0	0.0 | 1.0	0.0 | 1.0	0.004 | 1.0	0.0 | 1.0	0.0 | 1.0	0.0 | 1.0	0.0 | 1.0	0.0 | 1.0	0.0 | 1.0	0.0 | 1.0	0.005 | 1.0	0.006 | 1.0	0.005 | 1.0	0.0 | 1.0	0.0 | 1.0	0.0 | 1.0	0.005 | 1.0	0.001 | 1.0	0.002 | 1.0	0.001 | 1.0	0.0 | 1.0	0.0 | 1.0	0.0 | 1.0	0.001 | 1.0	0.0 | 1.0	0.0 | 1.0	0.0 | 1.0	0.0 | 1.0	0.0 | 1.0	0.0 | 1.0
GCG_GLP2R	CPI-SS04D518182	simple:P01275	simple:O95838	ENSG00000115263	ENSG00000065325	guidetopharmacology.org	TRUE	FALSE	0.0 | 1.0	0.0 | 1.0	0.0 | 1.0	0.0 | 1.0	0.0 | 1.0	0.0 | 1.0	0.002 | 1.0	0.0 | 1.0	0.0 | 1.0	0.0 | 1.0	0.0 | 1.0	0.0 | 1.0	0.0 | 1.0	0.0 | 1.0	0.0 | 1.0	0.0 | 1.0	0.0 | 1.0	0.0 | 1.0	0.0 | 1.0	0.0 | 1.0	0.0 | 1.0	0.0 | 1.0	0.0 | 1.0	0.0 | 1.0	0.0 | 1.0	0.0 | 1.0	0.0 | 1.0	0.0 | 1.0	0.0 | 1.0	0.0 | 1.0	0.0 | 1.0	0.0 | 1.0	0.0 | 1.0	0.0 | 1.0	0.0 | 1.0	0.0 | 1.0	0.0 | 1.0	0.0 | 1.0	0.0 | 1.0	0.0 | 1.0	0.0 | 1.0
GCG_IDE	CPI-SS01A29DD97	simple:P01275	simple:P14735	ENSG00000115263	ENSG00000119912	InnateDB-All	TRUE	FALSE	0.024 | 1.0	0.026 | 1.0	0.073 | 1.0	0.078 | 1.0	0.024 | 1.0	0.036 | 1.0	0.027 | 1.0	0.0 | 1.0	0.0 | 1.0	0.0 | 1.0	0.0 | 1.0	0.0 | 1.0	0.0 | 1.0	0.0 | 1.0	0.0 | 1.0	0.0 | 1.0	0.0 | 1.0	0.0 | 1.0	0.0 | 1.0	0.0 | 1.0	0.0 | 1.0	0.0 | 1.0	0.0 | 1.0	0.0 | 1.0	0.0 | 1.0	0.0 | 1.0	0.0 | 1.0	0.0 | 1.0	0.0 | 1.0	0.0 | 1.0	0.0 | 1.0	0.0 | 1.0	0.0 | 1.0	0.0 | 1.0	0.0 | 1.0	0.028 | 1.0	0.03 | 1.0	0.077 | 1.0	0.082 | 1.0	0.028 | 1.0	0.04 | 1.0
IGF2_IDE	CPI-SS0A3569604	simple:P01344	simple:P14735	ENSG00000167244	ENSG00000119912	InnateDB-All	TRUE	FALSE	1.56 | 1.0	1.563 | 1.0	1.609 | 1.0	1.614 | 0.0	1.56 | 1.0	1.572 | 1.0	1.564 | 1.0	1.007 | 1.0	1.009 | 1.0	1.055 | 1.0	1.06 | 1.0	1.007 | 1.0	1.018 | 1.0	1.01 | 1.0	0.183 | 1.0	0.186 | 1.0	0.232 | 1.0	0.237 | 1.0	0.184 | 1.0	0.195 | 1.0	0.187 | 1.0	0.193 | 1.0	0.195 | 1.0	0.242 | 1.0	0.247 | 1.0	0.193 | 1.0	0.205 | 1.0	0.196 | 1.0	2.192 | 1.0	2.194 | 1.0	2.241 | 1.0	2.246 | 0.0	2.192 | 1.0	2.204 | 1.0	2.196 | 1.0	3.223 | 1.0	3.226 | 1.0	3.272 | 1.0	3.277 | 0.0	3.223 | 1.0	3.235 | 1.0
INS_IDE	CPI-SS06908C6CC	simple:P01308	simple:P14735	ENSG00000254647	ENSG00000119912	InnateDB-All	TRUE	FALSE	0.024 | 1.0	0.026 | 1.0	0.073 | 1.0	0.078 | 1.0	0.024 | 1.0	0.036 | 1.0	0.027 | 1.0	0.0 | 1.0	0.0 | 1.0	0.0 | 1.0	0.0 | 1.0	0.0 | 1.0	0.0 | 1.0	0.0 | 1.0	0.0 | 1.0	0.0 | 1.0	0.0 | 1.0	0.0 | 1.0	0.0 | 1.0	0.0 | 1.0	0.0 | 1.0	0.0 | 1.0	0.0 | 1.0	0.0 | 1.0	0.0 | 1.0	0.0 | 1.0	0.0 | 1.0	0.0 | 1.0	0.024 | 1.0	0.026 | 1.0	0.072 | 1.0	0.077 | 1.0	0.024 | 1.0	0.035 | 1.0	0.027 | 1.0	0.0 | 1.0	0.0 | 1.0	0.0 | 1.0	0.0 | 1.0	0.0 | 1.0	0.0 | 1.0
NPPB_NPR1	CPI-SS02E9C11E7	simple:P16860	simple:P16066	ENSG00000120937	ENSG00000169418	guidetopharmacology.org	TRUE	FALSE	0.0 | 1.0	0.0 | 1.0	0.0 | 1.0	0.0 | 1.0	0.0 | 1.0	0.0 | 1.0	0.0 | 1.0	0.008 | 1.0	0.01 | 1.0	0.006 | 1.0	0.005 | 1.0	0.021 | 1.0	0.012 | 1.0	0.013 | 1.0	0.0 | 1.0	0.0 | 1.0	0.0 | 1.0	0.0 | 1.0	0.0 | 1.0	0.0 | 1.0	0.0 | 1.0	0.011 | 1.0	0.013 | 1.0	0.009 | 1.0	0.008 | 1.0	0.025 | 1.0	0.016 | 1.0	0.017 | 1.0	0.0 | 1.0	0.0 | 1.0	0.0 | 1.0	0.0 | 1.0	0.0 | 1.0	0.0 | 1.0	0.0 | 1.0	0.0 | 1.0	0.0 | 1.0	0.0 | 1.0	0.0 | 1.0	0.0 | 1.0	0.0 | 1.0
NPPA_NPR1	CPI-SS032AD1183	simple:P01160	simple:P16066	ENSG00000175206	ENSG00000169418	guidetopharmacology.org	TRUE	FALSE	0.0 | 1.0	0.0 | 1.0	0.0 | 1.0	0.0 | 1.0	0.0 | 1.0	0.0 | 1.0	0.0 | 1.0	0.0 | 1.0	0.0 | 1.0	0.0 | 1.0	0.0 | 1.0	0.0 | 1.0	0.0 | 1.0	0.0 | 1.0	0.0 | 1.0	0.0 | 1.0	0.0 | 1.0	0.0 | 1.0	0.0 | 1.0	0.0 | 1.0	0.0 | 1.0	0.0 | 1.0	0.0 | 1.0	0.0 | 1.0	0.0 | 1.0	0.0 | 1.0	0.0 | 1.0	0.0 | 1.0	0.0 | 1.0	0.0 | 1.0	0.0 | 1.0	0.0 | 1.0	0.0 | 1.0	0.0 | 1.0	0.0 | 1.0	0.0 | 1.0	0.0 | 1.0	0.0 | 1.0	0.0 | 1.0	0.0 | 1.0	0.0 | 1.0
NPPB_NPR3	CPI-SS023D39112	simple:P16860	simple:P17342	ENSG00000120937	ENSG00000113389	InnateDB-All	TRUE	FALSE	0.0 | 1.0	0.0 | 1.0	0.0 | 1.0	0.0 | 1.0	0.0 | 1.0	0.0 | 1.0	0.0 | 1.0	0.002 | 1.0	0.003 | 1.0	0.002 | 1.0	0.0 | 1.0	0.008 | 1.0	0.0 | 1.0	0.002 | 1.0	0.0 | 1.0	0.0 | 1.0	0.0 | 1.0	0.0 | 1.0	0.0 | 1.0	0.0 | 1.0	0.0 | 1.0	0.006 | 1.0	0.006 | 1.0	0.006 | 1.0	0.0 | 1.0	0.012 | 1.0	0.0 | 1.0	0.006 | 1.0	0.0 | 1.0	0.0 | 1.0	0.0 | 1.0	0.0 | 1.0	0.0 | 1.0	0.0 | 1.0	0.0 | 1.0	0.0 | 1.0	0.0 | 1.0	0.0 | 1.0	0.0 | 1.0	0.0 | 1.0	0.0 | 1.0
NPPC_NPR3	CPI-SS0A3778103	simple:P23582	simple:P17342	ENSG00000163273	ENSG00000113389	InnateDB-All	TRUE	FALSE	0.005 | 1.0	0.006 | 1.0	0.005 | 1.0	0.0 | 1.0	0.011 | 1.0	0.0 | 1.0	0.005 | 1.0	0.124 | 1.0	0.125 | 1.0	0.124 | 1.0	0.0 | 1.0	0.13 | 1.0	0.0 | 1.0	0.124 | 1.0	0.028 | 1.0	0.029 | 1.0	0.028 | 1.0	0.0 | 1.0	0.035 | 1.0	0.0 | 1.0	0.029 | 1.0	0.037 | 1.0	0.038 | 1.0	0.037 | 1.0	0.0 | 1.0	0.043 | 1.0	0.0 | 1.0	0.037 | 1.0	0.016 | 1.0	0.017 | 1.0	0.016 | 1.0	0.0 | 1.0	0.022 | 1.0	0.0 | 1.0	0.016 | 1.0	0.011 | 1.0	0.012 | 1.0	0.011 | 1.0	0.0 | 1.0	0.017 | 1.0	0.0 | 1.0
OSTN_NPR3	CPI-SS02BB5E698	simple:P61366	simple:P17342	ENSG00000188729	ENSG00000113389	guidetopharmacology.org	TRUE	FALSE	0.004 | 1.0	0.005 | 1.0	0.004 | 1.0	0.0 | 1.0	0.01 | 1.0	0.0 | 1.0	0.004 | 1.0	0.003 | 1.0	0.004 | 1.0	0.003 | 1.0	0.0 | 1.0	0.01 | 1.0	0.0 | 1.0	0.004 | 1.0	0.003 | 1.0	0.004 | 1.0	0.003 | 1.0	0.0 | 1.0	0.009 | 1.0	0.0 | 1.0	0.003 | 1.0	0.0 | 1.0	0.0 | 1.0	0.0 | 1.0	0.0 | 1.0	0.0 | 1.0	0.0 | 1.0	0.0 | 1.0	0.002 | 1.0	0.003 | 1.0	0.002 | 1.0	0.0 | 1.0	0.009 | 1.0	0.0 | 1.0	0.003 | 1.0	0.005 | 1.0	0.005 | 1.0	0.005 | 1.0	0.0 | 1.0	0.011 | 1.0	0.0 | 1.0
NPPB_NPR2	CPI-SS0779676D0	simple:P16860	simple:P20594	ENSG00000120937	ENSG00000159899	InnateDB-All	TRUE	FALSE	0.0 | 1.0	0.0 | 1.0	0.0 | 1.0	0.0 | 1.0	0.0 | 1.0	0.0 | 1.0	0.0 | 1.0	0.062 | 1.0	0.041 | 1.0	0.007 | 1.0	0.007 | 1.0	0.044 | 1.0	0.039 | 1.0	0.053 | 1.0	0.0 | 1.0	0.0 | 1.0	0.0 | 1.0	0.0 | 1.0	0.0 | 1.0	0.0 | 1.0	0.0 | 1.0	0.066 | 1.0	0.045 | 1.0	0.011 | 1.0	0.01 | 1.0	0.047 | 1.0	0.043 | 1.0	0.056 | 1.0	0.0 | 1.0	0.0 | 1.0	0.0 | 1.0	0.0 | 1.0	0.0 | 1.0	0.0 | 1.0	0.0 | 1.0	0.0 | 1.0	0.0 | 1.0	0.0 | 1.0	0.0 | 1.0	0.0 | 1.0	0.0 | 1.0
NPPC_NPR2	CPI-SS04EE13FF7	simple:P23582	simple:P20594	ENSG00000163273	ENSG00000159899	guidetopharmacology.org	TRUE	FALSE	0.065 | 1.0	0.044 | 1.0	0.01 | 1.0	0.009 | 1.0	0.046 | 1.0	0.042 | 1.0	0.055 | 1.0	0.185 | 1.0	0.163 | 1.0	0.129 | 1.0	0.129 | 1.0	0.166 | 1.0	0.161 | 1.0	0.175 | 1.0	0.089 | 1.0	0.067 | 1.0	0.033 | 1.0	0.033 | 1.0	0.07 | 1.0	0.065 | 1.0	0.079 | 1.0	0.097 | 1.0	0.076 | 1.0	0.042 | 1.0	0.041 | 1.0	0.078 | 1.0	0.074 | 1.0	0.087 | 1.0	0.076 | 1.0	0.055 | 1.0	0.021 | 1.0	0.021 | 1.0	0.057 | 1.0	0.053 | 1.0	0.067 | 1.0	0.071 | 1.0	0.05 | 1.0	0.016 | 1.0	0.016 | 1.0	0.052 | 1.0	0.048 | 1.0
VIP_VIPR1	CPI-SS0C8A09915	simple:P01282	simple:P32241	ENSG00000146469	ENSG00000114812	guidetopharmacology.org	TRUE	FALSE	0.0 | 1.0	0.0 | 1.0	0.0 | 1.0	0.0 | 1.0	0.0 | 1.0	0.0 | 1.0	0.0 | 1.0	0.002 | 1.0	0.0 | 1.0	0.001 | 1.0	0.0 | 1.0	0.0 | 1.0	0.0 | 1.0	0.002 | 1.0	0.002 | 1.0	0.0 | 1.0	0.002 | 1.0	0.0 | 1.0	0.0 | 1.0	0.0 | 1.0	0.002 | 1.0	0.0 | 1.0	0.0 | 1.0	0.0 | 1.0	0.0 | 1.0	0.0 | 1.0	0.0 | 1.0	0.0 | 1.0	0.0 | 1.0	0.0 | 1.0	0.0 | 1.0	0.0 | 1.0	0.0 | 1.0	0.0 | 1.0	0.0 | 1.0	0.0 | 1.0	0.0 | 1.0	0.0 | 1.0	0.0 | 1.0	0.0 | 1.0	0.0 | 1.0
GHRH_VIPR1	CPI-SS003AFD9BA	simple:P01286	simple:P32241	ENSG00000118702	ENSG00000114812	guidetopharmacology.org	TRUE	FALSE	0.0 | 1.0	0.0 | 1.0	0.0 | 1.0	0.0 | 1.0	0.0 | 1.0	0.0 | 1.0	0.0 | 1.0	0.002 | 1.0	0.0 | 1.0	0.001 | 1.0	0.0 | 1.0	0.0 | 1.0	0.0 | 1.0	0.002 | 1.0	0.0 | 1.0	0.0 | 1.0	0.0 | 1.0	0.0 | 1.0	0.0 | 1.0	0.0 | 1.0	0.0 | 1.0	0.0 | 1.0	0.0 | 1.0	0.0 | 1.0	0.0 | 1.0	0.0 | 1.0	0.0 | 1.0	0.0 | 1.0	0.0 | 1.0	0.0 | 1.0	0.0 | 1.0	0.0 | 1.0	0.0 | 1.0	0.0 | 1.0	0.0 | 1.0	0.002 | 1.0	0.0 | 1.0	0.002 | 1.0	0.0 | 1.0	0.0 | 1.0	0.0 | 1.0
SCT_VIPR1	CPI-SS0EC70F078	simple:P09683	simple:P32241	ENSG00000070031	ENSG00000114812	InnateDB-All	TRUE	FALSE	0.008 | 1.0	0.0 | 1.0	0.007 | 1.0	0.0 | 1.0	0.0 | 1.0	0.0 | 1.0	0.008 | 1.0	0.002 | 1.0	0.0 | 1.0	0.002 | 1.0	0.0 | 1.0	0.0 | 1.0	0.0 | 1.0	0.002 | 1.0	0.003 | 1.0	0.0 | 1.0	0.002 | 1.0	0.0 | 1.0	0.0 | 1.0	0.0 | 1.0	0.003 | 1.0	0.003 | 1.0	0.0 | 1.0	0.003 | 1.0	0.0 | 1.0	0.0 | 1.0	0.0 | 1.0	0.004 | 1.0	0.002 | 1.0	0.0 | 1.0	0.001 | 1.0	0.0 | 1.0	0.0 | 1.0	0.0 | 1.0	0.002 | 1.0	0.0 | 1.0	0.0 | 1.0	0.0 | 1.0	0.0 | 1.0	0.0 | 1.0	0.0 | 1.0
CCL22_CCR4	CPI-SS052B38F1C	simple:O00626	simple:P51679	ENSG00000102962	ENSG00000183813	curated	TRUE	FALSE	0.0 | 1.0	0.0 | 1.0	0.004 | 1.0	0.005 | 1.0	0.0 | 1.0	0.005 | 1.0	0.003 | 1.0	0.0 | 1.0	0.0 | 1.0	0.003 | 1.0	0.004 | 1.0	0.0 | 1.0	0.004 | 1.0	0.002 | 1.0	0.0 | 1.0	0.0 | 1.0	0.004 | 1.0	0.004 | 1.0	0.0 | 1.0	0.004 | 1.0	0.003 | 1.0	0.0 | 1.0	0.0 | 1.0	0.004 | 1.0	0.004 | 1.0	0.0 | 1.0	0.004 | 1.0	0.002 | 1.0	0.0 | 1.0	0.0 | 1.0	0.003 | 1.0	0.004 | 1.0	0.0 | 1.0	0.004 | 1.0	0.002 | 1.0	0.0 | 1.0	0.0 | 1.0	0.003 | 1.0	0.003 | 1.0	0.0 | 1.0	0.003 | 1.0
CCL17_CCR4	CPI-SS0EDD38B58	simple:Q92583	simple:P51679	ENSG00000102970	ENSG00000183813	curated	TRUE	FALSE	0.0 | 1.0	0.0 | 1.0	0.002 | 1.0	0.003 | 1.0	0.0 | 1.0	0.003 | 1.0	0.001 | 1.0	0.0 | 1.0	0.0 | 1.0	0.0 | 1.0	0.0 | 1.0	0.0 | 1.0	0.0 | 1.0	0.0 | 1.0	0.0 | 1.0	0.0 | 1.0	0.0 | 1.0	0.0 | 1.0	0.0 | 1.0	0.0 | 1.0	0.0 | 1.0	0.0 | 1.0	0.0 | 1.0	0.0 | 1.0	0.0 | 1.0	0.0 | 1.0	0.0 | 1.0	0.0 | 1.0	0.0 | 1.0	0.0 | 1.0	0.0 | 1.0	0.0 | 1.0	0.0 | 1.0	0.0 | 1.0	0.0 | 1.0	0.0 | 1.0	0.0 | 1.0	0.0 | 1.0	0.0 | 1.0	0.0 | 1.0	0.0 | 1.0
ADCYAP1_SCTR	CPI-SS0098B5107	simple:P18509	simple:P47872	ENSG00000141433	ENSG00000080293	InnateDB-All	TRUE	FALSE	0.003 | 1.0	0.004 | 1.0	0.006 | 1.0	0.004 | 1.0	0.01 | 1.0	0.008 | 1.0	0.008 | 1.0	0.002 | 1.0	0.003 | 1.0	0.005 | 1.0	0.003 | 1.0	0.009 | 1.0	0.007 | 1.0	0.007 | 1.0	0.0 | 1.0	0.0 | 1.0	0.0 | 1.0	0.0 | 1.0	0.0 | 1.0	0.0 | 1.0	0.0 | 1.0	0.007 | 1.0	0.009 | 1.0	0.011 | 1.0	0.008 | 1.0	0.015 | 1.0	0.012 | 1.0	0.012 | 1.0	0.0 | 1.0	0.0 | 1.0	0.0 | 1.0	0.0 | 1.0	0.0 | 1.0	0.0 | 1.0	0.0 | 1.0	0.0 | 1.0	0.0 | 1.0	0.0 | 1.0	0.0 | 1.0	0.0 | 1.0	0.0 | 1.0
SCT_SCTR	CPI-SS021F26C73	simple:P09683	simple:P47872	ENSG00000070031	ENSG00000080293	guidetopharmacology.org	TRUE	FALSE	0.008 | 1.0	0.009 | 1.0	0.011 | 1.0	0.009 | 1.0	0.015 | 1.0	0.013 | 1.0	0.013 | 1.0	0.002 | 1.0	0.003 | 1.0	0.005 | 1.0	0.003 | 1.0	0.01 | 1.0	0.007 | 1.0	0.007 | 1.0	0.003 | 1.0	0.004 | 1.0	0.006 | 1.0	0.004 | 1.0	0.01 | 1.0	0.008 | 1.0	0.008 | 1.0	0.003 | 1.0	0.004 | 1.0	0.007 | 1.0	0.004 | 1.0	0.011 | 1.0	0.008 | 1.0	0.008 | 1.0	0.002 | 1.0	0.003 | 1.0	0.005 | 1.0	0.003 | 1.0	0.009 | 1.0	0.007 | 1.0	0.007 | 1.0	0.0 | 1.0	0.0 | 1.0	0.0 | 1.0	0.0 | 1.0	0.0 | 1.0	0.0 | 1.0
ADCYAP1_ADCYAP1R1	CPI-SS0133239EA	simple:P18509	simple:P41586	ENSG00000141433	ENSG00000078549	InnateDB-All	TRUE	FALSE	0.01 | 1.0	0.04 | 1.0	0.014 | 1.0	0.006 | 1.0	0.007 | 1.0	0.01 | 1.0	0.028 | 1.0	0.009 | 1.0	0.039 | 1.0	0.013 | 1.0	0.005 | 1.0	0.006 | 1.0	0.009 | 1.0	0.027 | 1.0	0.0 | 1.0	0.0 | 1.0	0.0 | 1.0	0.0 | 1.0	0.0 | 1.0	0.0 | 1.0	0.0 | 1.0	0.014 | 1.0	0.044 | 1.0	0.018 | 1.0	0.01 | 1.0	0.012 | 1.0	0.015 | 1.0	0.033 | 1.0	0.0 | 1.0	0.0 | 1.0	0.0 | 1.0	0.0 | 1.0	0.0 | 1.0	0.0 | 1.0	0.0 | 1.0	0.0 | 1.0	0.0 | 1.0	0.0 | 1.0	0.0 | 1.0	0.0 | 1.0	0.0 | 1.0
CXCL6_CXCR2	CPI-SS093B46106	simple:P80162	simple:P25025	ENSG00000124875	ENSG00000180871	curated	TRUE	FALSE	0.002 | 1.0	0.002 | 1.0	0.002 | 1.0	0.0 | 1.0	0.002 | 1.0	0.002 | 1.0	0.003 | 1.0	0.002 | 1.0	0.002 | 1.0	0.002 | 1.0	0.0 | 1.0	0.002 | 1.0	0.002 | 1.0	0.002 | 1.0	0.058 | 1.0	0.058 | 1.0	0.058 | 1.0	0.0 | 1.0	0.058 | 1.0	0.058 | 1.0	0.059 | 1.0	0.014 | 1.0	0.013 | 1.0	0.013 | 1.0	0.0 | 1.0	0.013 | 1.0	0.013 | 1.0	0.014 | 1.0	0.004 | 1.0	0.004 | 1.0	0.004 | 1.0	0.0 | 1.0	0.004 | 1.0	0.004 | 1.0	0.004 | 1.0	0.0 | 1.0	0.0 | 1.0	0.0 | 1.0	0.0 | 1.0	0.0 | 1.0	0.0 | 1.0
PPBP_CXCR2	CPI-SS0C491A3C1	simple:P02775	simple:P25025	ENSG00000163736	ENSG00000180871	curated	TRUE	FALSE	0.002 | 1.0	0.001 | 1.0	0.001 | 1.0	0.0 | 1.0	0.001 | 1.0	0.002 | 1.0	0.002 | 1.0	0.002 | 1.0	0.001 | 1.0	0.001 | 1.0	0.0 | 1.0	0.001 | 1.0	0.002 | 1.0	0.002 | 1.0	0.002 | 1.0	0.002 | 1.0	0.002 | 1.0	0.0 | 1.0	0.001 | 1.0	0.002 | 1.0	0.002 | 1.0	0.003 | 1.0	0.003 | 1.0	0.003 | 1.0	0.0 | 1.0	0.003 | 1.0	0.003 | 1.0	0.004 | 1.0	0.0 | 1.0	0.0 | 1.0	0.0 | 1.0	0.0 | 1.0	0.0 | 1.0	0.0 | 1.0	0.0 | 1.0	0.002 | 1.0	0.002 | 1.0	0.002 | 1.0	0.0 | 1.0	0.002 | 1.0	0.002 | 1.0
CXCL13_CXCR5	CPI-SS0C2437E0D	simple:O43927	simple:P32302	ENSG00000156234	ENSG00000160683	curated	TRUE	FALSE	0.002 | 1.0	0.002 | 1.0	0.002 | 1.0	0.003 | 1.0	0.002 | 1.0	0.002 | 1.0	0.001 | 1.0	0.002 | 1.0	0.001 | 1.0	0.001 | 1.0	0.003 | 1.0	0.001 | 1.0	0.002 | 1.0	0.001 | 1.0	0.006 | 1.0	0.005 | 1.0	0.005 | 1.0	0.007 | 1.0	0.005 | 1.0	0.006 | 1.0	0.005 | 1.0	0.005 | 1.0	0.005 | 1.0	0.005 | 1.0	0.006 | 1.0	0.005 | 1.0	0.005 | 1.0	0.005 | 1.0	0.013 | 1.0	0.012 | 1.0	0.012 | 1.0	0.014 | 1.0	0.012 | 1.0	0.013 | 1.0	0.012 | 1.0	0.014 | 1.0	0.013 | 1.0	0.013 | 1.0	0.015 | 1.0	0.013 | 1.0	0.014 | 1.0
TNFRSF1A_FASLG	CPI-SS0A4F27388	simple:P19438	simple:P48023	ENSG00000067182	ENSG00000117560	InnateDB-All	TRUE	FALSE	0.066 | 1.0	0.068 | 1.0	0.067 | 1.0	0.07 | 1.0	0.0 | 1.0	0.0 | 1.0	0.067 | 1.0	0.115 | 1.0	0.116 | 1.0	0.116 | 1.0	0.119 | 1.0	0.0 | 1.0	0.0 | 1.0	0.115 | 1.0	0.052 | 1.0	0.053 | 1.0	0.053 | 1.0	0.055 | 1.0	0.0 | 1.0	0.0 | 1.0	0.052 | 1.0	0.025 | 1.0	0.027 | 1.0	0.026 | 1.0	0.029 | 1.0	0.0 | 1.0	0.0 | 1.0	0.026 | 1.0	0.128 | 1.0	0.129 | 1.0	0.128 | 1.0	0.131 | 1.0	0.0 | 1.0	0.0 | 1.0	0.128 | 1.0	0.099 | 1.0	0.1 | 1.0	0.1 | 1.0	0.102 | 1.0	0.0 | 1.0	0.0 | 1.0
TNFRSF10B_FASLG	CPI-SS0049FD74F	simple:O14763	simple:P48023	ENSG00000120889	ENSG00000117560	InnateDB-All	TRUE	FALSE	0.063 | 1.0	0.064 | 1.0	0.064 | 1.0	0.067 | 1.0	0.0 | 1.0	0.0 | 1.0	0.063 | 1.0	0.041 | 1.0	0.042 | 1.0	0.042 | 1.0	0.045 | 1.0	0.0 | 1.0	0.0 | 1.0	0.041 | 1.0	0.139 | 1.0	0.14 | 1.0	0.14 | 1.0	0.143 | 1.0	0.0 | 1.0	0.0 | 1.0	0.139 | 1.0	0.098 | 1.0	0.099 | 1.0	0.099 | 1.0	0.102 | 1.0	0.0 | 1.0	0.0 | 1.0	0.098 | 1.0	0.026 | 1.0	0.028 | 1.0	0.027 | 1.0	0.03 | 1.0	0.0 | 1.0	0.0 | 1.0	0.027 | 1.0	0.037 | 1.0	0.038 | 1.0	0.038 | 1.0	0.041 | 1.0	0.0 | 1.0	0.0 | 1.0
NRG1_MS4A4A	CPI-SS0978D28AB	simple:Q02297	simple:Q96JQ5	ENSG00000157168	ENSG00000110079	IntAct	TRUE	FALSE	0.025 | 1.0	0.022 | 1.0	0.018 | 1.0	0.028 | 1.0	0.017 | 1.0	0.023 | 1.0	0.019 | 1.0	0.016 | 1.0	0.014 | 1.0	0.01 | 1.0	0.019 | 1.0	0.009 | 1.0	0.014 | 1.0	0.01 | 1.0	0.02 | 1.0	0.018 | 1.0	0.014 | 1.0	0.023 | 1.0	0.013 | 1.0	0.018 | 1.0	0.014 | 1.0	0.037 | 1.0	0.034 | 1.0	0.03 | 1.0	0.039 | 1.0	0.029 | 1.0	0.034 | 1.0	0.03 | 1.0	0.013 | 1.0	0.011 | 1.0	0.007 | 1.0	0.016 | 1.0	0.006 | 1.0	0.011 | 1.0	0.007 | 1.0	0.016 | 1.0	0.013 | 1.0	0.009 | 1.0	0.019 | 1.0	0.008 | 1.0	0.014 | 1.0
NRG1_EGFR	CPI-SS0E845281E	simple:Q02297	simple:P00533	ENSG00000157168	ENSG00000146648	IntAct	TRUE	FALSE	0.017 | 1.0	0.0 | 1.0	0.02 | 1.0	0.026 | 1.0	0.017 | 1.0	0.016 | 1.0	0.016 | 1.0	0.008 | 1.0	0.0 | 1.0	0.011 | 1.0	0.017 | 1.0	0.009 | 1.0	0.008 | 1.0	0.007 | 1.0	0.012 | 1.0	0.0 | 1.0	0.015 | 1.0	0.021 | 1.0	0.013 | 1.0	0.012 | 1.0	0.011 | 1.0	0.029 | 1.0	0.0 | 1.0	0.032 | 1.0	0.037 | 1.0	0.029 | 1.0	0.028 | 1.0	0.028 | 1.0	0.005 | 1.0	0.0 | 1.0	0.008 | 1.0	0.014 | 1.0	0.006 | 1.0	0.005 | 1.0	0.004 | 1.0	0.008 | 1.0	0.0 | 1.0	0.011 | 1.0	0.017 | 1.0	0.008 | 1.0	0.007 | 1.0
TGFA_EGFR	CPI-SS07E5C3060	simple:P01135	simple:P00533	ENSG00000163235	ENSG00000146648	curated	TRUE	FALSE	0.005 | 1.0	0.0 | 1.0	0.008 | 1.0	0.014 | 1.0	0.005 | 1.0	0.004 | 1.0	0.004 | 1.0	0.007 | 1.0	0.0 | 1.0	0.01 | 1.0	0.016 | 1.0	0.008 | 1.0	0.007 | 1.0	0.006 | 1.0	0.038 | 1.0	0.0 | 1.0	0.041 | 1.0	0.047 | 1.0	0.039 | 1.0	0.038 | 1.0	0.037 | 1.0	0.043 | 1.0	0.0 | 1.0	0.046 | 1.0	0.052 | 1.0	0.044 | 1.0	0.043 | 1.0	0.042 | 1.0	0.005 | 1.0	0.0 | 1.0	0.008 | 1.0	0.014 | 1.0	0.006 | 1.0	0.005 | 1.0	0.004 | 1.0	0.003 | 1.0	0.0 | 1.0	0.006 | 1.0	0.011 | 1.0	0.003 | 1.0	0.002 | 1.0
HBEGF_EGFR	CPI-SS09B2ACA25	simple:Q99075	simple:P00533	ENSG00000113070	ENSG00000146648	curated	TRUE	FALSE	0.02 | 1.0	0.0 | 1.0	0.023 | 1.0	0.028 | 1.0	0.02 | 1.0	0.019 | 1.0	0.019 | 1.0	0.016 | 1.0	0.0 | 1.0	0.019 | 1.0	0.024 | 1.0	0.016 | 1.0	0.015 | 1.0	0.015 | 1.0	0.185 | 1.0	0.0 | 1.0	0.188 | 1.0	0.194 | 1.0	0.186 | 1.0	0.184 | 1.0	0.184 | 1.0	0.46 | 1.0	0.0 | 1.0	0.463 | 1.0	0.469 | 1.0	0.461 | 1.0	0.46 | 1.0	0.459 | 1.0	0.027 | 1.0	0.0 | 1.0	0.03 | 1.0	0.035 | 1.0	0.027 | 1.0	0.026 | 1.0	0.026 | 1.0	0.027 | 1.0	0.0 | 1.0	0.03 | 1.0	0.035 | 1.0	0.027 | 1.0	0.026 | 1.0
EGF_EGFR	CPI-SS09947DDD9	simple:P01133	simple:P00533	ENSG00000138798	ENSG00000146648	curated	TRUE	FALSE	0.0 | 1.0	0.0 | 1.0	0.0 | 1.0	0.0 | 1.0	0.0 | 1.0	0.0 | 1.0	0.0 | 1.0	0.0 | 1.0	0.0 | 1.0	0.0 | 1.0	0.0 | 1.0	0.0 | 1.0	0.0 | 1.0	0.0 | 1.0	0.0 | 1.0	0.0 | 1.0	0.0 | 1.0	0.0 | 1.0	0.0 | 1.0	0.0 | 1.0	0.0 | 1.0	0.004 | 1.0	0.0 | 1.0	0.007 | 1.0	0.012 | 1.0	0.004 | 1.0	0.003 | 1.0	0.003 | 1.0	0.0 | 1.0	0.0 | 1.0	0.0 | 1.0	0.0 | 1.0	0.0 | 1.0	0.0 | 1.0	0.0 | 1.0	0.003 | 1.0	0.0 | 1.0	0.006 | 1.0	0.011 | 1.0	0.003 | 1.0	0.002 | 1.0
BTC_EGFR	CPI-SS0CC966B71	simple:P35070	simple:P00533	ENSG00000174808	ENSG00000146648	curated	TRUE	FALSE	0.005 | 1.0	0.0 | 1.0	0.008 | 1.0	0.014 | 1.0	0.005 | 1.0	0.004 | 1.0	0.004 | 1.0	0.006 | 1.0	0.0 | 1.0	0.009 | 1.0	0.015 | 1.0	0.006 | 1.0	0.005 | 1.0	0.005 | 1.0	0.011 | 1.0	0.0 | 1.0	0.014 | 1.0	0.02 | 1.0	0.011 | 1.0	0.01 | 1.0	0.01 | 1.0	0.01 | 1.0	0.0 | 1.0	0.013 | 1.0	0.019 | 1.0	0.01 | 1.0	0.009 | 1.0	0.009 | 1.0	0.004 | 1.0	0.0 | 1.0	0.007 | 1.0	0.013 | 1.0	0.004 | 1.0	0.003 | 1.0	0.003 | 1.0	0.006 | 1.0	0.0 | 1.0	0.009 | 1.0	0.015 | 1.0	0.006 | 1.0	0.005 | 1.0
EREG_EGFR	CPI-SS004C23DCE	simple:O14944	simple:P00533	ENSG00000124882	ENSG00000146648	curated	TRUE	FALSE	0.003 | 1.0	0.0 | 1.0	0.006 | 1.0	0.011 | 1.0	0.003 | 1.0	0.002 | 1.0	0.002 | 1.0	0.003 | 1.0	0.0 | 1.0	0.005 | 1.0	0.011 | 1.0	0.003 | 1.0	0.002 | 1.0	0.002 | 1.0	0.005 | 1.0	0.0 | 1.0	0.008 | 1.0	0.013 | 1.0	0.005 | 1.0	0.004 | 1.0	0.004 | 1.0	0.0 | 1.0	0.0 | 1.0	0.0 | 1.0	0.0 | 1.0	0.0 | 1.0	0.0 | 1.0	0.0 | 1.0	0.0 | 1.0	0.0 | 1.0	0.0 | 1.0	0.0 | 1.0	0.0 | 1.0	0.0 | 1.0	0.0 | 1.0	0.003 | 1.0	0.0 | 1.0	0.006 | 1.0	0.011 | 1.0	0.003 | 1.0	0.002 | 1.0
AREG_EGFR	CPI-SS052119104	simple:P15514	simple:P00533	ENSG00000109321	ENSG00000146648	curated	TRUE	FALSE	0.002 | 1.0	0.0 | 1.0	0.005 | 1.0	0.011 | 1.0	0.003 | 1.0	0.002 | 1.0	0.001 | 1.0	0.003 | 1.0	0.0 | 1.0	0.006 | 1.0	0.012 | 1.0	0.004 | 1.0	0.002 | 1.0	0.002 | 1.0	0.003 | 1.0	0.0 | 1.0	0.006 | 1.0	0.012 | 1.0	0.004 | 1.0	0.003 | 1.0	0.002 | 1.0	0.02 | 1.0	0.0 | 1.0	0.023 | 1.0	0.029 | 1.0	0.021 | 1.0	0.02 | 1.0	0.019 | 1.0	0.0 | 1.0	0.0 | 1.0	0.0 | 1.0	0.0 | 1.0	0.0 | 1.0	0.0 | 1.0	0.0 | 1.0	0.0 | 1.0	0.0 | 1.0	0.0 | 1.0	0.0 | 1.0	0.0 | 1.0	0.0 | 1.0
EPGN_EGFR	CPI-SS060790CF0	simple:Q6UW88	simple:P00533	ENSG00000182585	ENSG00000146648	curated	TRUE	FALSE	0.003 | 1.0	0.0 | 1.0	0.006 | 1.0	0.011 | 1.0	0.003 | 1.0	0.002 | 1.0	0.002 | 1.0	0.0 | 1.0	0.0 | 1.0	0.0 | 1.0	0.0 | 1.0	0.0 | 1.0	0.0 | 1.0	0.0 | 1.0	0.004 | 1.0	0.0 | 1.0	0.007 | 1.0	0.013 | 1.0	0.004 | 1.0	0.003 | 1.0	0.003 | 1.0	0.008 | 1.0	0.0 | 1.0	0.011 | 1.0	0.017 | 1.0	0.008 | 1.0	0.007 | 1.0	0.007 | 1.0	0.0 | 1.0	0.0 | 1.0	0.0 | 1.0	0.0 | 1.0	0.0 | 1.0	0.0 | 1.0	0.0 | 1.0	0.0 | 1.0	0.0 | 1.0	0.0 | 1.0	0.0 | 1.0	0.0 | 1.0	0.0 | 1.0
NRG1_ERBB4	CPI-SS0BD5C2A23	simple:Q02297	simple:Q15303	ENSG00000157168	ENSG00000178568	curated	TRUE	FALSE	0.016 | 1.0	0.016 | 1.0	0.017 | 1.0	0.0 | 1.0	0.017 | 1.0	0.016 | 1.0	0.016 | 1.0	0.007 | 1.0	0.007 | 1.0	0.008 | 1.0	0.0 | 1.0	0.009 | 1.0	0.008 | 1.0	0.007 | 1.0	0.011 | 1.0	0.011 | 1.0	0.012 | 1.0	0.0 | 1.0	0.013 | 1.0	0.012 | 1.0	0.011 | 1.0	0.028 | 1.0	0.027 | 1.0	0.028 | 1.0	0.0 | 1.0	0.029 | 1.0	0.028 | 1.0	0.028 | 1.0	0.004 | 1.0	0.004 | 1.0	0.005 | 1.0	0.0 | 1.0	0.006 | 1.0	0.005 | 1.0	0.004 | 1.0	0.007 | 1.0	0.007 | 1.0	0.008 | 1.0	0.0 | 1.0	0.008 | 1.0	0.007 | 1.0
HBEGF_ERBB4	CPI-SS060B846D1	simple:Q99075	simple:Q15303	ENSG00000113070	ENSG00000178568	curated	TRUE	FALSE	0.018 | 1.0	0.018 | 1.0	0.019 | 1.0	0.0 | 1.0	0.02 | 1.0	0.019 | 1.0	0.019 | 1.0	0.015 | 1.0	0.014 | 1.0	0.016 | 1.0	0.0 | 1.0	0.016 | 1.0	0.015 | 1.0	0.015 | 1.0	0.184 | 1.0	0.184 | 1.0	0.185 | 1.0	0.0 | 1.0	0.186 | 1.0	0.184 | 1.0	0.184 | 1.0	0.459 | 1.0	0.459 | 1.0	0.46 | 1.0	0.0 | 1.0	0.461 | 1.0	0.46 | 1.0	0.459 | 1.0	0.026 | 1.0	0.026 | 1.0	0.027 | 1.0	0.0 | 1.0	0.027 | 1.0	0.026 | 1.0	0.026 | 1.0	0.026 | 1.0	0.026 | 1.0	0.027 | 1.0	0.0 | 1.0	0.027 | 1.0	0.026 | 1.0
BTC_ERBB4	CPI-SS0F0D7F25C	simple:P35070	simple:Q15303	ENSG00000174808	ENSG00000178568	curated	TRUE	FALSE	0.004 | 1.0	0.004 | 1.0	0.005 | 1.0	0.0 | 1.0	0.005 | 1.0	0.004 | 1.0	0.004 | 1.0	0.005 | 1.0	0.005 | 1.0	0.006 | 1.0	0.0 | 1.0	0.006 | 1.0	0.005 | 1.0	0.005 | 1.0	0.01 | 1.0	0.01 | 1.0	0.011 | 1.0	0.0 | 1.0	0.011 | 1.0	0.01 | 1.0	0.01 | 1.0	0.009 | 1.0	0.009 | 1.0	0.01 | 1.0	0.0 | 1.0	0.01 | 1.0	0.009 | 1.0	0.009 | 1.0	0.003 | 1.0	0.003 | 1.0	0.004 | 1.0	0.0 | 1.0	0.004 | 1.0	0.003 | 1.0	0.003 | 1.0	0.005 | 1.0	0.005 | 1.0	0.006 | 1.0	0.0 | 1.0	0.006 | 1.0	0.005 | 1.0
EREG_ERBB4	CPI-SS0FC42EC80	simple:O14944	simple:Q15303	ENSG00000124882	ENSG00000178568	curated	TRUE	FALSE	0.002 | 1.0	0.002 | 1.0	0.003 | 1.0	0.0 | 1.0	0.003 | 1.0	0.002 | 1.0	0.002 | 1.0	0.001 | 1.0	0.001 | 1.0	0.002 | 1.0	0.0 | 1.0	0.003 | 1.0	0.002 | 1.0	0.002 | 1.0	0.004 | 1.0	0.004 | 1.0	0.005 | 1.0	0.0 | 1.0	0.005 | 1.0	0.004 | 1.0	0.004 | 1.0	0.0 | 1.0	0.0 | 1.0	0.0 | 1.0	0.0 | 1.0	0.0 | 1.0	0.0 | 1.0	0.0 | 1.0	0.0 | 1.0	0.0 | 1.0	0.0 | 1.0	0.0 | 1.0	0.0 | 1.0	0.0 | 1.0	0.0 | 1.0	0.002 | 1.0	0.002 | 1.0	0.003 | 1.0	0.0 | 1.0	0.003 | 1.0	0.002 | 1.0
NRG2_ERBB4	CPI-SS0E063192D	simple:O14511	simple:Q15303	ENSG00000158458	ENSG00000178568	curated	TRUE	FALSE	0.01 | 1.0	0.01 | 1.0	0.011 | 1.0	0.0 | 1.0	0.012 | 1.0	0.011 | 1.0	0.011 | 1.0	0.005 | 1.0	0.005 | 1.0	0.006 | 1.0	0.0 | 1.0	0.006 | 1.0	0.005 | 1.0	0.005 | 1.0	0.005 | 1.0	0.005 | 1.0	0.006 | 1.0	0.0 | 1.0	0.007 | 1.0	0.006 | 1.0	0.005 | 1.0	0.007 | 1.0	0.007 | 1.0	0.008 | 1.0	0.0 | 1.0	0.008 | 1.0	0.007 | 1.0	0.007 | 1.0	0.003 | 1.0	0.003 | 1.0	0.004 | 1.0	0.0 | 1.0	0.004 | 1.0	0.003 | 1.0	0.003 | 1.0	0.006 | 1.0	0.006 | 1.0	0.007 | 1.0	0.0 | 1.0	0.007 | 1.0	0.006 | 1.0
NRG3_ERBB4	CPI-SS0D5E30C6C	simple:P56975	simple:Q15303	ENSG00000185737	ENSG00000178568	curated	TRUE	FALSE	0.001 | 1.0	0.001 | 1.0	0.002 | 1.0	0.0 | 1.0	0.003 | 1.0	0.002 | 1.0	0.001 | 1.0	0.0 | 1.0	0.0 | 1.0	0.0 | 1.0	0.0 | 1.0	0.0 | 1.0	0.0 | 1.0	0.0 | 1.0	0.0 | 1.0	0.0 | 1.0	0.0 | 1.0	0.0 | 1.0	0.0 | 1.0	0.0 | 1.0	0.0 | 1.0	0.0 | 1.0	0.0 | 1.0	0.0 | 1.0	0.0 | 1.0	0.0 | 1.0	0.0 | 1.0	0.0 | 1.0	0.002 | 1.0	0.002 | 1.0	0.003 | 1.0	0.0 | 1.0	0.004 | 1.0	0.002 | 1.0	0.002 | 1.0	0.0 | 1.0	0.0 | 1.0	0.0 | 1.0	0.0 | 1.0	0.0 | 1.0	0.0 | 1.0
NRG4_ERBB4	CPI-SS0627D0E22	simple:Q8WWG1	simple:Q15303	ENSG00000169752	ENSG00000178568	curated	TRUE	FALSE	0.002 | 1.0	0.002 | 1.0	0.003 | 1.0	0.0 | 1.0	0.003 | 1.0	0.002 | 1.0	0.002 | 1.0	0.001 | 1.0	0.001 | 1.0	0.002 | 1.0	0.0 | 1.0	0.003 | 1.0	0.002 | 1.0	0.002 | 1.0	0.0 | 1.0	0.0 | 1.0	0.0 | 1.0	0.0 | 1.0	0.0 | 1.0	0.0 | 1.0	0.0 | 1.0	0.0 | 1.0	0.0 | 1.0	0.0 | 1.0	0.0 | 1.0	0.0 | 1.0	0.0 | 1.0	0.0 | 1.0	0.001 | 1.0	0.001 | 1.0	0.002 | 1.0	0.0 | 1.0	0.003 | 1.0	0.002 | 1.0	0.001 | 1.0	0.002 | 1.0	0.002 | 1.0	0.003 | 1.0	0.0 | 1.0	0.003 | 1.0	0.002 | 1.0
NRG1_ERBB3	CPI-SS02B906C26	simple:Q02297	simple:P21860	ENSG00000157168	ENSG00000065361	curated	TRUE	FALSE	0.042 | 1.0	0.017 | 1.0	0.066 | 1.0	0.046 | 1.0	0.016 | 1.0	0.02 | 1.0	0.021 | 1.0	0.033 | 1.0	0.008 | 1.0	0.058 | 1.0	0.038 | 1.0	0.007 | 1.0	0.012 | 1.0	0.013 | 1.0	0.037 | 1.0	0.013 | 1.0	0.062 | 1.0	0.042 | 1.0	0.011 | 1.0	0.016 | 1.0	0.017 | 1.0	0.054 | 1.0	0.029 | 1.0	0.078 | 1.0	0.058 | 1.0	0.028 | 1.0	0.032 | 1.0	0.033 | 1.0	0.03 | 1.0	0.005 | 1.0	0.055 | 1.0	0.035 | 1.0	0.004 | 1.0	0.009 | 1.0	0.01 | 1.0	0.033 | 1.0	0.008 | 1.0	0.057 | 1.0	0.037 | 1.0	0.007 | 1.0	0.011 | 1.0
BTC_ERBB3	CPI-SS05A6C9EC5	simple:P35070	simple:P21860	ENSG00000174808	ENSG00000065361	curated	TRUE	FALSE	0.03 | 1.0	0.005 | 1.0	0.054 | 1.0	0.034 | 1.0	0.004 | 1.0	0.008 | 1.0	0.009 | 1.0	0.031 | 1.0	0.006 | 1.0	0.055 | 1.0	0.035 | 1.0	0.005 | 1.0	0.009 | 1.0	0.01 | 1.0	0.036 | 1.0	0.011 | 1.0	0.06 | 1.0	0.04 | 1.0	0.01 | 1.0	0.014 | 1.0	0.015 | 1.0	0.035 | 1.0	0.01 | 1.0	0.059 | 1.0	0.039 | 1.0	0.009 | 1.0	0.014 | 1.0	0.014 | 1.0	0.029 | 1.0	0.004 | 1.0	0.053 | 1.0	0.033 | 1.0	0.003 | 1.0	0.007 | 1.0	0.008 | 1.0	0.031 | 1.0	0.006 | 1.0	0.055 | 1.0	0.035 | 1.0	0.005 | 1.0	0.009 | 1.0
NRG2_ERBB3	CPI-SS053613259	simple:O14511	simple:P21860	ENSG00000158458	ENSG00000065361	curated	TRUE	FALSE	0.036 | 1.0	0.012 | 1.0	0.061 | 1.0	0.041 | 1.0	0.01 | 1.0	0.015 | 1.0	0.016 | 1.0	0.031 | 1.0	0.006 | 1.0	0.055 | 1.0	0.035 | 1.0	0.005 | 1.0	0.009 | 1.0	0.01 | 1.0	0.031 | 1.0	0.006 | 1.0	0.056 | 1.0	0.036 | 1.0	0.005 | 1.0	0.01 | 1.0	0.011 | 1.0	0.033 | 1.0	0.008 | 1.0	0.057 | 1.0	0.037 | 1.0	0.007 | 1.0	0.011 | 1.0	0.012 | 1.0	0.029 | 1.0	0.004 | 1.0	0.053 | 1.0	0.033 | 1.0	0.003 | 1.0	0.007 | 1.0	0.008 | 1.0	0.032 | 1.0	0.007 | 1.0	0.056 | 1.0	0.036 | 1.0	0.006 | 1.0	0.01 | 1.0
CCL7_CCR1	CPI-SS02CC53E89	simple:P80098	simple:P32246	ENSG00000108688	ENSG00000163823	curated	TRUE	FALSE	0.0 | 1.0	0.003 | 1.0	0.003 | 1.0	0.0 | 1.0	0.003 | 1.0	0.003 | 1.0	0.0 | 1.0	0.0 | 1.0	0.004 | 1.0	0.004 | 1.0	0.0 | 1.0	0.004 | 1.0	0.004 | 1.0	0.0 | 1.0	0.0 | 1.0	0.006 | 1.0	0.006 | 1.0	0.0 | 1.0	0.006 | 1.0	0.006 | 1.0	0.0 | 1.0	0.0 | 1.0	0.005 | 1.0	0.005 | 1.0	0.0 | 1.0	0.005 | 1.0	0.005 | 1.0	0.0 | 1.0	0.0 | 1.0	0.006 | 1.0	0.006 | 1.0	0.0 | 1.0	0.006 | 1.0	0.006 | 1.0	0.0 | 1.0	0.0 | 1.0	0.007 | 1.0	0.007 | 1.0	0.0 | 1.0	0.007 | 1.0	0.007 | 1.0
CCL8_CCR1	CPI-SS087054090	simple:P80075	simple:P32246	ENSG00000108700	ENSG00000163823	curated	TRUE	FALSE	0.0 | 1.0	0.001 | 1.0	0.001 | 1.0	0.0 | 1.0	0.001 | 1.0	0.002 | 1.0	0.0 | 1.0	0.0 | 1.0	0.001 | 1.0	0.001 | 1.0	0.0 | 1.0	0.001 | 1.0	0.002 | 1.0	0.0 | 1.0	0.0 | 1.0	0.0 | 1.0	0.0 | 1.0	0.0 | 1.0	0.0 | 1.0	0.0 | 1.0	0.0 | 1.0	0.0 | 1.0	0.0 | 1.0	0.0 | 1.0	0.0 | 1.0	0.0 | 1.0	0.0 | 1.0	0.0 | 1.0	0.0 | 1.0	0.0 | 1.0	0.0 | 1.0	0.0 | 1.0	0.0 | 1.0	0.0 | 1.0	0.0 | 1.0	0.0 | 1.0	0.0 | 1.0	0.0 | 1.0	0.0 | 1.0	0.0 | 1.0	0.0 | 1.0
CCL26_CCR1	CPI-SS0F06E4B3F	simple:Q9Y258	simple:P32246	ENSG00000006606	ENSG00000163823	curated	TRUE	FALSE	0.0 | 1.0	0.002 | 1.0	0.002 | 1.0	0.0 | 1.0	0.002 | 1.0	0.002 | 1.0	0.0 | 1.0	0.0 | 1.0	0.001 | 1.0	0.001 | 1.0	0.0 | 1.0	0.001 | 1.0	0.002 | 1.0	0.0 | 1.0	0.0 | 1.0	0.0 | 1.0	0.0 | 1.0	0.0 | 1.0	0.0 | 1.0	0.0 | 1.0	0.0 | 1.0	0.0 | 1.0	0.0 | 1.0	0.0 | 1.0	0.0 | 1.0	0.0 | 1.0	0.0 | 1.0	0.0 | 1.0	0.0 | 1.0	0.002 | 1.0	0.001 | 1.0	0.0 | 1.0	0.001 | 1.0	0.002 | 1.0	0.0 | 1.0	0.0 | 1.0	0.0 | 1.0	0.0 | 1.0	0.0 | 1.0	0.0 | 1.0	0.0 | 1.0
CCL7_ACKR2	CPI-SS0FD442A0E	simple:P80098	simple:O00590	ENSG00000108688	ENSG00000144648	curated	TRUE	FALSE	0.003 | 1.0	0.003 | 1.0	0.0 | 1.0	0.0 | 1.0	0.003 | 1.0	0.0 | 1.0	0.003 | 1.0	0.003 | 1.0	0.003 | 1.0	0.0 | 1.0	0.0 | 1.0	0.004 | 1.0	0.0 | 1.0	0.003 | 1.0	0.006 | 1.0	0.006 | 1.0	0.0 | 1.0	0.0 | 1.0	0.006 | 1.0	0.0 | 1.0	0.006 | 1.0	0.005 | 1.0	0.005 | 1.0	0.0 | 1.0	0.0 | 1.0	0.005 | 1.0	0.0 | 1.0	0.005 | 1.0	0.006 | 1.0	0.005 | 1.0	0.0 | 1.0	0.0 | 1.0	0.006 | 1.0	0.0 | 1.0	0.005 | 1.0	0.007 | 1.0	0.007 | 1.0	0.0 | 1.0	0.0 | 1.0	0.007 | 1.0	0.0 | 1.0
CCL8_ACKR2	CPI-SS0F6F1C29E	simple:P80075	simple:O00590	ENSG00000108700	ENSG00000144648	curated	TRUE	FALSE	0.001 | 1.0	0.001 | 1.0	0.0 | 1.0	0.0 | 1.0	0.001 | 1.0	0.0 | 1.0	0.001 | 1.0	0.001 | 1.0	0.001 | 1.0	0.0 | 1.0	0.0 | 1.0	0.001 | 1.0	0.0 | 1.0	0.001 | 1.0	0.0 | 1.0	0.0 | 1.0	0.0 | 1.0	0.0 | 1.0	0.0 | 1.0	0.0 | 1.0	0.0 | 1.0	0.0 | 1.0	0.0 | 1.0	0.0 | 1.0	0.0 | 1.0	0.0 | 1.0	0.0 | 1.0	0.0 | 1.0	0.0 | 1.0	0.0 | 1.0	0.0 | 1.0	0.0 | 1.0	0.0 | 1.0	0.0 | 1.0	0.0 | 1.0	0.0 | 1.0	0.0 | 1.0	0.0 | 1.0	0.0 | 1.0	0.0 | 1.0	0.0 | 1.0
CCL7_CCR5	CPI-SS09C16258E	simple:P80098	simple:P51681	ENSG00000108688	ENSG00000160791	curated	TRUE	FALSE	0.028 | 1.0	0.011 | 1.0	0.012 | 1.0	0.029 | 1.0	0.01 | 1.0	0.019 | 1.0	0.013 | 1.0	0.028 | 1.0	0.012 | 1.0	0.013 | 1.0	0.03 | 1.0	0.011 | 1.0	0.019 | 1.0	0.013 | 1.0	0.031 | 1.0	0.015 | 1.0	0.015 | 1.0	0.032 | 1.0	0.013 | 1.0	0.022 | 1.0	0.016 | 1.0	0.03 | 1.0	0.013 | 1.0	0.014 | 1.0	0.031 | 1.0	0.012 | 1.0	0.021 | 1.0	0.015 | 1.0	0.031 | 1.0	0.014 | 1.0	0.015 | 1.0	0.032 | 1.0	0.013 | 1.0	0.022 | 1.0	0.016 | 1.0	0.032 | 1.0	0.016 | 1.0	0.016 | 1.0	0.033 | 1.0	0.014 | 1.0	0.023 | 1.0
CCL8_CCR5	CPI-SS0C30EC0DE	simple:P80075	simple:P51681	ENSG00000108700	ENSG00000160791	curated	TRUE	FALSE	0.026 | 1.0	0.01 | 1.0	0.01 | 1.0	0.028 | 1.0	0.008 | 1.0	0.017 | 1.0	0.011 | 1.0	0.026 | 1.0	0.01 | 1.0	0.01 | 1.0	0.027 | 1.0	0.008 | 1.0	0.017 | 1.0	0.011 | 1.0	0.0 | 1.0	0.0 | 1.0	0.0 | 1.0	0.0 | 1.0	0.0 | 1.0	0.0 | 1.0	0.0 | 1.0	0.0 | 1.0	0.0 | 1.0	0.0 | 1.0	0.0 | 1.0	0.0 | 1.0	0.0 | 1.0	0.0 | 1.0	0.0 | 1.0	0.0 | 1.0	0.0 | 1.0	0.0 | 1.0	0.0 | 1.0	0.0 | 1.0	0.0 | 1.0	0.0 | 1.0	0.0 | 1.0	0.0 | 1.0	0.0 | 1.0	0.0 | 1.0	0.0 | 1.0
CCL28_CCR10	CPI-SS0BCCA6596	simple:Q9NRJ3	simple:P46092	ENSG00000151882	ENSG00000184451	guidetopharmacology.org	TRUE	FALSE	0.007 | 1.0	0.007 | 1.0	0.007 | 1.0	0.0 | 1.0	0.008 | 1.0	0.009 | 1.0	0.008 | 1.0	0.005 | 1.0	0.005 | 1.0	0.004 | 1.0	0.0 | 1.0	0.006 | 1.0	0.007 | 1.0	0.006 | 1.0	0.0 | 1.0	0.0 | 1.0	0.0 | 1.0	0.0 | 1.0	0.0 | 1.0	0.0 | 1.0	0.0 | 1.0	0.005 | 1.0	0.005 | 1.0	0.005 | 1.0	0.0 | 1.0	0.006 | 1.0	0.007 | 1.0	0.006 | 1.0	0.002 | 1.0	0.002 | 1.0	0.001 | 1.0	0.0 | 1.0	0.003 | 1.0	0.004 | 1.0	0.003 | 1.0	0.0 | 1.0	0.0 | 1.0	0.0 | 1.0	0.0 | 1.0	0.0 | 1.0	0.0 | 1.0
CCL27_CCR10	CPI-SS0BFCF6B11	simple:Q9Y4X3	simple:P46092	ENSG00000213927	ENSG00000184451	curated	TRUE	FALSE	0.003 | 1.0	0.003 | 1.0	0.003 | 1.0	0.0 | 1.0	0.004 | 1.0	0.005 | 1.0	0.004 | 1.0	0.004 | 1.0	0.004 | 1.0	0.004 | 1.0	0.0 | 1.0	0.005 | 1.0	0.006 | 1.0	0.005 | 1.0	0.013 | 1.0	0.012 | 1.0	0.012 | 1.0	0.0 | 1.0	0.014 | 1.0	0.015 | 1.0	0.013 | 1.0	0.003 | 1.0	0.003 | 1.0	0.003 | 1.0	0.0 | 1.0	0.004 | 1.0	0.005 | 1.0	0.004 | 1.0	0.004 | 1.0	0.004 | 1.0	0.004 | 1.0	0.0 | 1.0	0.005 | 1.0	0.006 | 1.0	0.005 | 1.0	0.002 | 1.0	0.002 | 1.0	0.002 | 1.0	0.0 | 1.0	0.003 | 1.0	0.004 | 1.0
KLRG1_CDH1	CPI-SS0854A5B2B	simple:Q96E93	simple:P12830	ENSG00000139187	ENSG00000039068	curated	FALSE	FALSE	0.017 | 1.0	0.029 | 1.0	1.143 | 1.0	1.148 | 1.0	0.016 | 1.0	0.018 | 1.0	0.018 | 1.0	0.0 | 1.0	0.0 | 1.0	0.0 | 1.0	0.0 | 1.0	0.0 | 1.0	0.0 | 1.0	0.0 | 1.0	0.018 | 1.0	0.03 | 1.0	1.143 | 1.0	1.148 | 1.0	0.017 | 1.0	0.019 | 1.0	0.018 | 1.0	0.021 | 1.0	0.033 | 1.0	1.146 | 1.0	1.151 | 1.0	0.02 | 1.0	0.022 | 1.0	0.021 | 1.0	0.018 | 1.0	0.03 | 1.0	1.143 | 1.0	1.148 | 1.0	0.016 | 1.0	0.018 | 1.0	0.018 | 1.0	0.018 | 1.0	0.03 | 1.0	1.143 | 1.0	1.148 | 1.0	0.017 | 1.0	0.019 | 1.0
MAFA_CDH1	CPI-SS0854A5B2B	simple:Q96E93	simple:P12830	ENSG00000182759	ENSG00000039068	curated	FALSE	FALSE	0.017 | 1.0	0.029 | 1.0	1.143 | 1.0	1.148 | 1.0	0.016 | 1.0	0.018 | 1.0	0.018 | 1.0	0.0 | 1.0	0.0 | 1.0	0.0 | 1.0	0.0 | 1.0	0.0 | 1.0	0.0 | 1.0	0.0 | 1.0	0.0 | 1.0	0.0 | 1.0	0.0 | 1.0	0.0 | 1.0	0.0 | 1.0	0.0 | 1.0	0.0 | 1.0	0.0 | 1.0	0.0 | 1.0	0.0 | 1.0	0.0 | 1.0	0.0 | 1.0	0.0 | 1.0	0.0 | 1.0	0.0 | 1.0	0.0 | 1.0	0.0 | 1.0	0.0 | 1.0	0.0 | 1.0	0.0 | 1.0	0.0 | 1.0	0.018 | 1.0	0.03 | 1.0	1.143 | 1.0	1.148 | 1.0	0.017 | 1.0	0.019 | 1.0
ACKR2_CCL2	CPI-SS03165AD8C	simple:O00590	simple:P13500	ENSG00000144648	ENSG00000108691	curated	TRUE	FALSE	0.004 | 1.0	0.017 | 1.0	0.001 | 1.0	0.005 | 1.0	0.089 | 1.0	0.087 | 1.0	0.023 | 1.0	0.004 | 1.0	0.017 | 1.0	0.001 | 1.0	0.005 | 1.0	0.089 | 1.0	0.087 | 1.0	0.023 | 1.0	0.0 | 1.0	0.0 | 1.0	0.0 | 1.0	0.0 | 1.0	0.0 | 1.0	0.0 | 1.0	0.0 | 1.0	0.0 | 1.0	0.0 | 1.0	0.0 | 1.0	0.0 | 1.0	0.0 | 1.0	0.0 | 1.0	0.0 | 1.0	0.005 | 1.0	0.017 | 1.0	0.001 | 1.0	0.005 | 1.0	0.09 | 1.0	0.087 | 1.0	0.024 | 1.0	0.0 | 1.0	0.0 | 1.0	0.0 | 1.0	0.0 | 1.0	0.0 | 1.0	0.0 | 1.0
SPN_ICAM1	CPI-SS092AA7A93	simple:P16150	simple:P05362	ENSG00000197471	ENSG00000090339	curated	FALSE	FALSE	0.021 | 1.0	0.044 | 1.0	0.031 | 1.0	0.04 | 1.0	0.158 | 1.0	0.084 | 1.0	0.065 | 1.0	0.017 | 1.0	0.04 | 1.0	0.027 | 1.0	0.036 | 1.0	0.155 | 1.0	0.081 | 1.0	0.062 | 1.0	0.03 | 1.0	0.053 | 1.0	0.04 | 1.0	0.049 | 1.0	0.167 | 1.0	0.093 | 1.0	0.074 | 1.0	0.022 | 1.0	0.045 | 1.0	0.032 | 1.0	0.041 | 1.0	0.16 | 1.0	0.086 | 1.0	0.067 | 1.0	0.017 | 1.0	0.04 | 1.0	0.026 | 1.0	0.036 | 1.0	0.154 | 1.0	0.08 | 1.0	0.061 | 1.0	0.015 | 1.0	0.038 | 1.0	0.025 | 1.0	0.034 | 1.0	0.152 | 1.0	0.078 | 1.0
HBEGF_CD44	CPI-SS0CF76A867	simple:Q99075	simple:P16070	ENSG00000113070	ENSG00000026508	InnateDB-All	TRUE	FALSE	0.023 | 1.0	0.02 | 1.0	0.048 | 1.0	0.032 | 1.0	0.039 | 1.0	0.039 | 1.0	0.023 | 1.0	0.019 | 1.0	0.016 | 1.0	0.044 | 1.0	0.029 | 1.0	0.036 | 1.0	0.035 | 1.0	0.019 | 1.0	0.188 | 1.0	0.185 | 1.0	0.214 | 1.0	0.198 | 1.0	0.205 | 1.0	0.204 | 1.0	0.188 | 1.0	0.463 | 1.0	0.46 | 1.0	0.489 | 1.0	0.473 | 1.0	0.48 | 1.0	0.479 | 1.0	0.463 | 1.0	0.03 | 1.0	0.027 | 1.0	0.056 | 1.0	0.04 | 1.0	0.047 | 1.0	0.046 | 1.0	0.03 | 1.0	0.03 | 1.0	0.027 | 1.0	0.055 | 1.0	0.04 | 1.0	0.047 | 1.0	0.046 | 1.0
SPP1_CD44	CPI-SS02AB0C3E0	simple:P10451	simple:P16070	ENSG00000118785	ENSG00000026508	IntAct	TRUE	FALSE	0.005 | 1.0	0.002 | 1.0	0.031 | 1.0	0.015 | 1.0	0.022 | 1.0	0.021 | 1.0	0.005 | 1.0	0.007 | 1.0	0.004 | 1.0	0.032 | 1.0	0.016 | 1.0	0.023 | 1.0	0.023 | 1.0	0.006 | 1.0	0.012 | 1.0	0.009 | 1.0	0.037 | 1.0	0.021 | 1.0	0.028 | 1.0	0.028 | 1.0	0.011 | 1.0	0.04 | 1.0	0.037 | 1.0	0.066 | 1.0	0.05 | 1.0	0.057 | 1.0	0.056 | 1.0	0.04 | 1.0	0.006 | 1.0	0.003 | 1.0	0.032 | 1.0	0.016 | 1.0	0.023 | 1.0	0.022 | 1.0	0.006 | 1.0	0.0 | 1.0	0.0 | 1.0	0.0 | 1.0	0.0 | 1.0	0.0 | 1.0	0.0 | 1.0
SELE_CD44	CPI-SS0D329BE85	simple:P16581	simple:P16070	ENSG00000007908	ENSG00000026508	curated	FALSE	FALSE	0.009 | 1.0	0.006 | 1.0	0.034 | 1.0	0.018 | 1.0	0.025 | 1.0	0.025 | 1.0	0.008 | 1.0	0.006 | 1.0	0.003 | 1.0	0.031 | 1.0	0.015 | 1.0	0.022 | 1.0	0.022 | 1.0	0.006 | 1.0	0.007 | 1.0	0.004 | 1.0	0.033 | 1.0	0.017 | 1.0	0.024 | 1.0	0.023 | 1.0	0.007 | 1.0	0.007 | 1.0	0.004 | 1.0	0.033 | 1.0	0.017 | 1.0	0.024 | 1.0	0.023 | 1.0	0.007 | 1.0	0.006 | 1.0	0.003 | 1.0	0.032 | 1.0	0.016 | 1.0	0.023 | 1.0	0.022 | 1.0	0.006 | 1.0	0.0 | 1.0	0.0 | 1.0	0.0 | 1.0	0.0 | 1.0	0.0 | 1.0	0.0 | 1.0
TNFRSF1A_TNFSF13	CPI-SS018588D3A	simple:P19438	simple:O75888	ENSG00000067182	ENSG00000161955	InnateDB-All	TRUE	FALSE	0.075 | 1.0	0.095 | 1.0	0.129 | 1.0	0.12 | 1.0	0.079 | 1.0	0.078 | 1.0	0.102 | 1.0	0.124 | 1.0	0.144 | 1.0	0.178 | 1.0	0.169 | 1.0	0.128 | 1.0	0.127 | 1.0	0.151 | 1.0	0.06 | 1.0	0.08 | 1.0	0.114 | 1.0	0.105 | 1.0	0.065 | 1.0	0.064 | 1.0	0.087 | 1.0	0.034 | 1.0	0.054 | 1.0	0.088 | 1.0	0.079 | 1.0	0.039 | 1.0	0.037 | 1.0	0.061 | 1.0	0.136 | 1.0	0.156 | 1.0	0.19 | 1.0	0.181 | 1.0	0.141 | 1.0	0.139 | 1.0	0.163 | 1.0	0.107 | 1.0	0.127 | 1.0	0.161 | 1.0	0.152 | 1.0	0.112 | 1.0	0.111 | 1.0
FAS_TNFSF13	CPI-SS00ADA045A	simple:P25445	simple:O75888	ENSG00000026103	ENSG00000161955	InnateDB-All	TRUE	FALSE	0.011 | 1.0	0.032 | 1.0	0.065 | 1.0	0.056 | 1.0	0.016 | 1.0	0.015 | 1.0	0.038 | 1.0	0.011 | 1.0	0.031 | 1.0	0.065 | 1.0	0.055 | 1.0	0.015 | 1.0	0.014 | 1.0	0.038 | 1.0	0.01 | 1.0	0.03 | 1.0	0.064 | 1.0	0.055 | 1.0	0.014 | 1.0	0.013 | 1.0	0.037 | 1.0	0.013 | 1.0	0.034 | 1.0	0.067 | 1.0	0.058 | 1.0	0.018 | 1.0	0.017 | 1.0	0.04 | 1.0	0.015 | 1.0	0.035 | 1.0	0.069 | 1.0	0.06 | 1.0	0.019 | 1.0	0.018 | 1.0	0.042 | 1.0	0.013 | 1.0	0.034 | 1.0	0.067 | 1.0	0.058 | 1.0	0.018 | 1.0	0.017 | 1.0
SELE_GLG1	CPI-SS04F90EE0D	simple:P16581	simple:Q92896	ENSG00000007908	ENSG00000090863	curated	FALSE	FALSE	0.13 | 1.0	0.136 | 1.0	0.135 | 1.0	0.149 | 1.0	0.172 | 1.0	0.195 | 1.0	0.131 | 1.0	0.127 | 1.0	0.133 | 1.0	0.133 | 1.0	0.146 | 1.0	0.17 | 1.0	0.192 | 1.0	0.128 | 1.0	0.128 | 1.0	0.135 | 1.0	0.134 | 1.0	0.148 | 1.0	0.171 | 1.0	0.193 | 1.0	0.129 | 1.0	0.128 | 1.0	0.134 | 1.0	0.134 | 1.0	0.147 | 1.0	0.171 | 1.0	0.193 | 1.0	0.129 | 1.0	0.128 | 1.0	0.134 | 1.0	0.133 | 1.0	0.147 | 1.0	0.17 | 1.0	0.192 | 1.0	0.129 | 1.0	0.0 | 1.0	0.0 | 1.0	0.0 | 1.0	0.0 | 1.0	0.0 | 1.0	0.0 | 1.0
CXCL6_CXCR1	CPI-SS03818E1DD	simple:P80162	simple:P25024	ENSG00000124875	ENSG00000163464	curated	TRUE	FALSE	0.007 | 1.0	0.002 | 1.0	0.005 | 1.0	0.007 | 1.0	0.0 | 1.0	0.004 | 1.0	0.002 | 1.0	0.007 | 1.0	0.002 | 1.0	0.005 | 1.0	0.007 | 1.0	0.0 | 1.0	0.004 | 1.0	0.002 | 1.0	0.063 | 1.0	0.058 | 1.0	0.061 | 1.0	0.063 | 1.0	0.0 | 1.0	0.06 | 1.0	0.058 | 1.0	0.018 | 1.0	0.013 | 1.0	0.016 | 1.0	0.019 | 1.0	0.0 | 1.0	0.016 | 1.0	0.014 | 1.0	0.009 | 1.0	0.004 | 1.0	0.007 | 1.0	0.009 | 1.0	0.0 | 1.0	0.006 | 1.0	0.004 | 1.0	0.0 | 1.0	0.0 | 1.0	0.0 | 1.0	0.0 | 1.0	0.0 | 1.0	0.0 | 1.0
GH1_PRLR	CPI-SS0A606E2DA	simple:P01241	simple:P16471	ENSG00000259384	ENSG00000113494	IntAct	TRUE	FALSE	0.0 | 1.0	0.0 | 1.0	0.0 | 1.0	0.0 | 1.0	0.0 | 1.0	0.0 | 1.0	0.0 | 1.0	0.004 | 1.0	0.002 | 1.0	0.003 | 1.0	0.008 | 1.0	0.004 | 1.0	0.006 | 1.0	0.003 | 1.0	0.003 | 1.0	0.002 | 1.0	0.002 | 1.0	0.007 | 1.0	0.004 | 1.0	0.005 | 1.0	0.002 | 1.0	0.0 | 1.0	0.0 | 1.0	0.0 | 1.0	0.0 | 1.0	0.0 | 1.0	0.0 | 1.0	0.0 | 1.0	0.0 | 1.0	0.0 | 1.0	0.0 | 1.0	0.0 | 1.0	0.0 | 1.0	0.0 | 1.0	0.0 | 1.0	0.0 | 1.0	0.0 | 1.0	0.0 | 1.0	0.0 | 1.0	0.0 | 1.0	0.0 | 1.0
CSHL1_PRLR	CPI-SS05F6B4FED	simple:Q14406	simple:P16471	ENSG00000204414	ENSG00000113494	guidetopharmacology.org	TRUE	FALSE	0.0 | 1.0	0.0 | 1.0	0.0 | 1.0	0.0 | 1.0	0.0 | 1.0	0.0 | 1.0	0.0 | 1.0	0.004 | 1.0	0.002 | 1.0	0.003 | 1.0	0.008 | 1.0	0.004 | 1.0	0.006 | 1.0	0.003 | 1.0	0.003 | 1.0	0.002 | 1.0	0.002 | 1.0	0.007 | 1.0	0.004 | 1.0	0.005 | 1.0	0.002 | 1.0	0.0 | 1.0	0.0 | 1.0	0.0 | 1.0	0.0 | 1.0	0.0 | 1.0	0.0 | 1.0	0.0 | 1.0	0.0 | 1.0	0.0 | 1.0	0.0 | 1.0	0.0 | 1.0	0.0 | 1.0	0.0 | 1.0	0.0 | 1.0	0.0 | 1.0	0.0 | 1.0	0.0 | 1.0	0.0 | 1.0	0.0 | 1.0	0.0 | 1.0
PRL_PRLR	CPI-SS00689751B	simple:P01236	simple:P16471	ENSG00000172179	ENSG00000113494	IntAct	TRUE	FALSE	0.018 | 1.0	0.017 | 1.0	0.017 | 1.0	0.022 | 1.0	0.019 | 1.0	0.02 | 1.0	0.017 | 1.0	0.015 | 1.0	0.014 | 1.0	0.015 | 1.0	0.019 | 1.0	0.016 | 1.0	0.017 | 1.0	0.015 | 1.0	0.017 | 1.0	0.015 | 1.0	0.016 | 1.0	0.021 | 1.0	0.017 | 1.0	0.019 | 1.0	0.016 | 1.0	0.019 | 1.0	0.018 | 1.0	0.018 | 1.0	0.023 | 1.0	0.019 | 1.0	0.021 | 1.0	0.018 | 1.0	0.017 | 1.0	0.015 | 1.0	0.016 | 1.0	0.021 | 1.0	0.017 | 1.0	0.019 | 1.0	0.016 | 1.0	0.012 | 1.0	0.01 | 1.0	0.011 | 1.0	0.016 | 1.0	0.012 | 1.0	0.014 | 1.0
GH1_GHR	CPI-SS0ACD3CCEE	simple:P01241	simple:P10912	ENSG00000259384	ENSG00000112964	guidetopharmacology.org	TRUE	FALSE	0.0 | 1.0	0.0 | 1.0	0.0 | 1.0	0.0 | 1.0	0.0 | 1.0	0.0 | 1.0	0.0 | 1.0	0.023 | 1.0	0.01 | 1.0	0.004 | 1.0	0.006 | 1.0	0.012 | 1.0	0.012 | 1.0	0.021 | 1.0	0.023 | 1.0	0.009 | 1.0	0.004 | 1.0	0.005 | 1.0	0.012 | 1.0	0.011 | 1.0	0.021 | 1.0	0.0 | 1.0	0.0 | 1.0	0.0 | 1.0	0.0 | 1.0	0.0 | 1.0	0.0 | 1.0	0.0 | 1.0	0.0 | 1.0	0.0 | 1.0	0.0 | 1.0	0.0 | 1.0	0.0 | 1.0	0.0 | 1.0	0.0 | 1.0	0.0 | 1.0	0.0 | 1.0	0.0 | 1.0	0.0 | 1.0	0.0 | 1.0	0.0 | 1.0
GH2_GHR	CPI-SS0DB45E7DF	simple:P01242	simple:P10912	ENSG00000136487	ENSG00000112964	guidetopharmacology.org	TRUE	FALSE	0.0 | 1.0	0.0 | 1.0	0.0 | 1.0	0.0 | 1.0	0.0 | 1.0	0.0 | 1.0	0.0 | 1.0	0.023 | 1.0	0.01 | 1.0	0.004 | 1.0	0.006 | 1.0	0.012 | 1.0	0.012 | 1.0	0.021 | 1.0	0.023 | 1.0	0.009 | 1.0	0.004 | 1.0	0.005 | 1.0	0.012 | 1.0	0.011 | 1.0	0.021 | 1.0	0.0 | 1.0	0.0 | 1.0	0.0 | 1.0	0.0 | 1.0	0.0 | 1.0	0.0 | 1.0	0.0 | 1.0	0.0 | 1.0	0.0 | 1.0	0.0 | 1.0	0.0 | 1.0	0.0 | 1.0	0.0 | 1.0	0.0 | 1.0	0.0 | 1.0	0.0 | 1.0	0.0 | 1.0	0.0 | 1.0	0.0 | 1.0	0.0 | 1.0
CSF3_CSF1R	CPI-SS094EDDBBA	simple:P09919	simple:P07333	ENSG00000108342	ENSG00000182578	guidetopharmacology.org	TRUE	FALSE	0.003 | 1.0	0.003 | 1.0	0.001 | 1.0	0.009 | 1.0	0.008 | 1.0	0.006 | 1.0	0.002 | 1.0	0.003 | 1.0	0.003 | 1.0	0.001 | 1.0	0.009 | 1.0	0.008 | 1.0	0.006 | 1.0	0.002 | 1.0	0.003 | 1.0	0.003 | 1.0	0.002 | 1.0	0.009 | 1.0	0.008 | 1.0	0.006 | 1.0	0.003 | 1.0	0.0 | 1.0	0.0 | 1.0	0.0 | 1.0	0.0 | 1.0	0.0 | 1.0	0.0 | 1.0	0.0 | 1.0	0.0 | 1.0	0.0 | 1.0	0.0 | 1.0	0.0 | 1.0	0.0 | 1.0	0.0 | 1.0	0.0 | 1.0	0.0 | 1.0	0.0 | 1.0	0.0 | 1.0	0.0 | 1.0	0.0 | 1.0	0.0 | 1.0
CSF1_CSF1R	CPI-SS0AB1F04A0	simple:P09603	simple:P07333	ENSG00000184371	ENSG00000182578	curated	TRUE	FALSE	0.022 | 1.0	0.022 | 1.0	0.02 | 1.0	0.028 | 1.0	0.027 | 1.0	0.025 | 1.0	0.021 | 1.0	0.017 | 1.0	0.016 | 1.0	0.015 | 1.0	0.022 | 1.0	0.021 | 1.0	0.019 | 1.0	0.016 | 1.0	0.023 | 1.0	0.022 | 1.0	0.021 | 1.0	0.028 | 1.0	0.027 | 1.0	0.025 | 1.0	0.022 | 1.0	0.023 | 1.0	0.023 | 1.0	0.022 | 1.0	0.029 | 1.0	0.028 | 1.0	0.026 | 1.0	0.023 | 1.0	0.044 | 1.0	0.044 | 1.0	0.042 | 1.0	0.05 | 1.0	0.049 | 1.0	0.047 | 1.0	0.044 | 1.0	0.064 | 1.0	0.064 | 1.0	0.062 | 1.0	0.07 | 1.0	0.069 | 1.0	0.067 | 1.0
IL34_CSF1R	CPI-SS015162AFC	simple:Q6ZMJ4	simple:P07333	ENSG00000157368	ENSG00000182578	curated	TRUE	FALSE	0.005 | 1.0	0.005 | 1.0	0.003 | 1.0	0.011 | 1.0	0.01 | 1.0	0.008 | 1.0	0.005 | 1.0	0.008 | 1.0	0.008 | 1.0	0.006 | 1.0	0.014 | 1.0	0.013 | 1.0	0.011 | 1.0	0.007 | 1.0	0.003 | 1.0	0.003 | 1.0	0.002 | 1.0	0.009 | 1.0	0.008 | 1.0	0.006 | 1.0	0.003 | 1.0	0.007 | 1.0	0.006 | 1.0	0.005 | 1.0	0.012 | 1.0	0.011 | 1.0	0.009 | 1.0	0.006 | 1.0	0.009 | 1.0	0.009 | 1.0	0.007 | 1.0	0.015 | 1.0	0.014 | 1.0	0.012 | 1.0	0.008 | 1.0	0.004 | 1.0	0.003 | 1.0	0.002 | 1.0	0.009 | 1.0	0.008 | 1.0	0.006 | 1.0
CSF3_CSF3R	CPI-SS08376F0E6	simple:P09919	simple:Q99062	ENSG00000108342	ENSG00000119535	curated	TRUE	FALSE	0.007 | 1.0	0.003 | 1.0	0.001 | 1.0	0.003 | 1.0	0.003 | 1.0	0.002 | 1.0	0.003 | 1.0	0.006 | 1.0	0.003 | 1.0	0.001 | 1.0	0.003 | 1.0	0.003 | 1.0	0.002 | 1.0	0.003 | 1.0	0.007 | 1.0	0.004 | 1.0	0.002 | 1.0	0.003 | 1.0	0.003 | 1.0	0.002 | 1.0	0.003 | 1.0	0.0 | 1.0	0.0 | 1.0	0.0 | 1.0	0.0 | 1.0	0.0 | 1.0	0.0 | 1.0	0.0 | 1.0	0.0 | 1.0	0.0 | 1.0	0.0 | 1.0	0.0 | 1.0	0.0 | 1.0	0.0 | 1.0	0.0 | 1.0	0.0 | 1.0	0.0 | 1.0	0.0 | 1.0	0.0 | 1.0	0.0 | 1.0	0.0 | 1.0
EGFR_TGFB1	CPI-SS0055264F3	simple:P00533	simple:P01137	ENSG00000146648	ENSG00000105329	MINT	TRUE	FALSE	0.008 | 1.0	0.002 | 1.0	0.002 | 1.0	0.0 | 1.0	0.0 | 1.0	0.004 | 1.0	0.002 | 1.0	0.0 | 1.0	0.0 | 1.0	0.0 | 1.0	0.0 | 1.0	0.0 | 1.0	0.0 | 1.0	0.0 | 1.0	0.011 | 1.0	0.005 | 1.0	0.005 | 1.0	0.0 | 1.0	0.0 | 1.0	0.007 | 1.0	0.005 | 1.0	0.017 | 1.0	0.011 | 1.0	0.011 | 1.0	0.0 | 1.0	0.0 | 1.0	0.012 | 1.0	0.011 | 1.0	0.009 | 1.0	0.003 | 1.0	0.003 | 1.0	0.0 | 1.0	0.0 | 1.0	0.004 | 1.0	0.003 | 1.0	0.008 | 1.0	0.002 | 1.0	0.002 | 1.0	0.0 | 1.0	0.0 | 1.0	0.003 | 1.0
TGFBR3_TGFB1	CPI-SS0322F3EA0	simple:Q03167	simple:P01137	ENSG00000069702	ENSG00000105329	curated	TRUE	FALSE	0.034 | 1.0	0.028 | 1.0	0.028 | 1.0	0.0 | 1.0	0.0 | 1.0	0.03 | 1.0	0.028 | 1.0	0.05 | 1.0	0.044 | 1.0	0.044 | 1.0	0.0 | 1.0	0.0 | 1.0	0.045 | 1.0	0.044 | 1.0	0.018 | 1.0	0.012 | 1.0	0.012 | 1.0	0.0 | 1.0	0.0 | 1.0	0.014 | 1.0	0.012 | 1.0	0.021 | 1.0	0.015 | 1.0	0.015 | 1.0	0.0 | 1.0	0.0 | 1.0	0.017 | 1.0	0.015 | 1.0	0.207 | 1.0	0.201 | 1.0	0.201 | 1.0	0.0 | 1.0	0.0 | 1.0	0.202 | 1.0	0.201 | 1.0	0.29 | 1.0	0.284 | 1.0	0.285 | 1.0	0.0 | 1.0	0.0 | 1.0	0.286 | 1.0
TGFBR3_TGFB3	CPI-SS0B4EEA780	simple:Q03167	simple:P10600	ENSG00000069702	ENSG00000119699	curated	TRUE	FALSE	0.041 | 1.0	0.045 | 1.0	0.051 | 1.0	0.044 | 1.0	0.066 | 1.0	0.069 | 1.0	0.06 | 1.0	0.057 | 1.0	0.061 | 1.0	0.067 | 1.0	0.06 | 1.0	0.082 | 1.0	0.085 | 1.0	0.075 | 1.0	0.025 | 1.0	0.029 | 1.0	0.035 | 1.0	0.028 | 1.0	0.05 | 1.0	0.053 | 1.0	0.043 | 1.0	0.028 | 1.0	0.032 | 1.0	0.038 | 1.0	0.031 | 1.0	0.053 | 1.0	0.056 | 1.0	0.047 | 1.0	0.214 | 1.0	0.217 | 1.0	0.224 | 1.0	0.217 | 1.0	0.239 | 1.0	0.242 | 1.0	0.232 | 1.0	0.298 | 1.0	0.301 | 1.0	0.308 | 1.0	0.301 | 1.0	0.323 | 1.0	0.326 | 1.0
TTR_AGER	CPI-SS06006F870	simple:P02766	simple:Q15109	ENSG00000118271	ENSG00000204305	MINT	TRUE	FALSE	0.011 | 1.0	0.011 | 1.0	0.01 | 1.0	0.0 | 1.0	0.011 | 1.0	0.012 | 1.0	0.011 | 1.0	0.0 | 1.0	0.0 | 1.0	0.0 | 1.0	0.0 | 1.0	0.0 | 1.0	0.0 | 1.0	0.0 | 1.0	0.007 | 1.0	0.008 | 1.0	0.007 | 1.0	0.0 | 1.0	0.007 | 1.0	0.008 | 1.0	0.008 | 1.0	0.0 | 1.0	0.0 | 1.0	0.0 | 1.0	0.0 | 1.0	0.0 | 1.0	0.0 | 1.0	0.0 | 1.0	0.0 | 1.0	0.0 | 1.0	0.0 | 1.0	0.0 | 1.0	0.0 | 1.0	0.0 | 1.0	0.0 | 1.0	0.0 | 1.0	0.0 | 1.0	0.0 | 1.0	0.0 | 1.0	0.0 | 1.0	0.0 | 1.0
TTR_DDR1	CPI-SS00D3CD86E	simple:P02766	simple:Q08345	ENSG00000118271	ENSG00000204580	IntAct	TRUE	FALSE	0.053 | 1.0	0.036 | 1.0	0.091 | 1.0	0.121 | 1.0	0.027 | 1.0	0.035 | 1.0	0.034 | 1.0	0.0 | 1.0	0.0 | 1.0	0.0 | 1.0	0.0 | 1.0	0.0 | 1.0	0.0 | 1.0	0.0 | 1.0	0.05 | 1.0	0.032 | 1.0	0.088 | 1.0	0.117 | 1.0	0.023 | 1.0	0.031 | 1.0	0.03 | 1.0	0.0 | 1.0	0.0 | 1.0	0.0 | 1.0	0.0 | 1.0	0.0 | 1.0	0.0 | 1.0	0.0 | 1.0	0.0 | 1.0	0.0 | 1.0	0.0 | 1.0	0.0 | 1.0	0.0 | 1.0	0.0 | 1.0	0.0 | 1.0	0.0 | 1.0	0.0 | 1.0	0.0 | 1.0	0.0 | 1.0	0.0 | 1.0	0.0 | 1.0
APP_CD74	CPI-SS080C81D37	simple:P05067	simple:P04233	ENSG00000142192	ENSG00000019582	curated	FALSE	FALSE	0.46 | 1.0	0.46 | 1.0	0.472 | 1.0	0.469 | 1.0	0.46 | 1.0	0.461 | 1.0	0.461 | 1.0	0.499 | 1.0	0.499 | 1.0	0.51 | 1.0	0.508 | 1.0	0.499 | 1.0	0.499 | 1.0	0.5 | 1.0	0.661 | 1.0	0.66 | 1.0	0.672 | 1.0	0.669 | 1.0	0.66 | 1.0	0.661 | 1.0	0.662 | 1.0	0.647 | 1.0	0.647 | 1.0	0.658 | 1.0	0.656 | 1.0	0.647 | 1.0	0.647 | 1.0	0.648 | 1.0	0.6 | 1.0	0.6 | 1.0	0.611 | 1.0	0.609 | 1.0	0.6 | 1.0	0.6 | 1.0	0.601 | 1.0	0.555 | 1.0	0.555 | 1.0	0.566 | 1.0	0.564 | 1.0	0.555 | 1.0	0.555 | 1.0
NRP2_VEGFA	CPI-SS0E00478B4	simple:O60462	simple:P15692	ENSG00000118257	ENSG00000112715	curated	TRUE	FALSE	0.372 | 1.0	0.43 | 1.0	0.123 | 1.0	0.099 | 1.0	0.23 | 1.0	0.176 | 1.0	0.391 | 1.0	0.381 | 1.0	0.44 | 1.0	0.133 | 1.0	0.108 | 1.0	0.239 | 1.0	0.186 | 1.0	0.401 | 1.0	0.385 | 1.0	0.443 | 1.0	0.136 | 1.0	0.112 | 1.0	0.243 | 1.0	0.189 | 1.0	0.404 | 1.0	0.377 | 1.0	0.435 | 1.0	0.128 | 1.0	0.104 | 1.0	0.235 | 1.0	0.182 | 1.0	0.396 | 1.0	0.459 | 0.0	0.518 | 0.0	0.211 | 1.0	0.186 | 1.0	0.317 | 0.828	0.264 | 1.0	0.479 | 0.0	0.407 | 1.0	0.466 | 1.0	0.159 | 1.0	0.134 | 1.0	0.265 | 1.0	0.212 | 1.0
KDR_VEGFA	CPI-SS043D33875	simple:P35968	simple:P15692	ENSG00000128052	ENSG00000112715	curated	TRUE	FALSE	0.47 | 0.0	0.529 | 0.0	0.222 | 1.0	0.197 | 1.0	0.328 | 0.393	0.275 | 0.976	0.489 | 0.0	0.364 | 1.0	0.423 | 1.0	0.116 | 1.0	0.091 | 1.0	0.222 | 1.0	0.169 | 1.0	0.383 | 1.0	0.363 | 1.0	0.422 | 1.0	0.115 | 1.0	0.09 | 1.0	0.221 | 1.0	0.168 | 1.0	0.383 | 1.0	0.373 | 1.0	0.431 | 1.0	0.124 | 1.0	0.1 | 1.0	0.23 | 1.0	0.177 | 1.0	0.392 | 1.0	0.372 | 1.0	0.43 | 1.0	0.123 | 1.0	0.099 | 1.0	0.23 | 1.0	0.176 | 1.0	0.391 | 1.0	0.365 | 1.0	0.424 | 1.0	0.117 | 1.0	0.092 | 1.0	0.223 | 1.0	0.17 | 1.0
[truncated: 753 more rows]
[truncated: 8 more columns]
