# Supplementary material for: Single-cell sequencing of neonatal uterus reveals an Misr2+ endometrial progenitor indispensable for fertility
Source: eLife. 2019 Jun 24;8:e46349. doi: 10.7554/eLife.46349 (PMC6650247; doi:10.7554/eLife.46349)
Supplement: Figure 4—source data 2. — Related to Figure 4—figure supplement 4F. [file elife-46349-fig4-data2.xlsx]

## Sheet: Sheet1
	p_val	avg_logFC	pct.1	pct.2	p_val_adj
Id3	1.47e-69	-1.98777	0.178	0.839	3.26e-65
Acsm3	1.09e-66	1.78737	0.411	0.002	2.42e-62
Msx2	3.43e-42	-1.38542	0.166	0.674	7.61e-38
Id2	2.12e-34	-1.24093	0.154	0.629	4.7e-30
Tubb2b	1.1e-32	-1.47414	0.083	0.536	2.45e-28
Msx1	2.45e-29	-1.06638	0.324	0.708	5.43e-25
Akr1b1	2.1e-27	-0.943532	0.394	0.74	4.67e-23
Cndp1	6.69e-25	-1.07467	0.174	0.568	1.48e-20
AABR07068705.1	1.52e-22	0.864901	0.763	0.571	3.38e-18
Fam20c	3.1e-22	0.789326	0.253	0.041	6.89e-18
LOC100910163	4.82e-22	1.26277	0.593	0.326	1.07e-17
LOC100360316	1.66e-21	0.636355	0.846	0.782	3.68e-17
Uchl1	2.57e-21	0.933532	0.398	0.137	5.7e-17
Tuba1a	1.67e-20	-0.787133	0.394	0.711	3.71e-16
Lypd6b	3.92e-20	0.781179	0.32	0.084	8.7e-16
Mt3	7.57e-19	-0.998232	0.012	0.288	1.68e-14
Fth1	3.76e-18	-0.482356	0.813	0.922	8.36e-14
Mt1	7.36e-17	-0.685749	0.282	0.621	1.63e-12
Zfp791	2.28e-15	0.856941	0.448	0.225	5.06e-11
Id1	2.86e-15	-0.562587	0.481	0.755	6.35e-11
Smoc2	5.72e-15	0.742412	0.315	0.108	1.27e-10
Rpl36	5.89e-15	-0.488432	0.506	0.767	1.31e-10
Btg2	2.26e-14	0.64431	0.826	0.796	5.02e-10
Cndp2	2.47e-14	-0.656209	0.228	0.522	5.48e-10
Rps13	1.33e-13	-0.529175	0.456	0.75	2.95e-09
Tmsb4x	1.67e-13	-0.317087	0.884	0.963	3.71e-09
Spint2	2.28e-13	0.446878	0.855	0.784	5.06e-09
F3	3.1e-13	0.933472	0.257	0.082	6.89e-09
Shfm1	3.19e-13	-0.637758	0.336	0.616	7.08e-09
Sdc4	4.43e-13	0.552414	0.813	0.703	9.84e-09
Hbegf	7.89e-13	0.76373	0.373	0.161	1.75e-08
Sms	1.12e-12	-0.556211	0.39	0.673	2.5e-08
Mdk	1.19e-12	-0.356474	0.68	0.858	2.63e-08
Rack1	1.54e-12	-0.318786	0.884	0.954	3.41e-08
Rps27	2.17e-12	-0.435596	0.66	0.84	4.81e-08
Mt2A	2.79e-12	-0.478059	0.378	0.664	6.19e-08
AC121415.1	4.94e-12	-0.392295	0.751	0.866	1.1e-07
Vcan	6.23e-12	-0.593346	0.112	0.356	1.38e-07
Rpl11	7.06e-12	-0.375054	0.776	0.889	1.57e-07
Id4	8.87e-12	-0.636036	0.079	0.3	1.97e-07
Ivd	1.16e-11	-0.624977	0.241	0.493	2.58e-07
Ndrg2	1.2e-11	-0.692175	0.058	0.271	2.67e-07
Vav3	2.12e-11	-0.694042	0.133	0.367	4.7e-07
Aldh1a3	2.33e-11	-0.523324	0.17	0.426	5.17e-07
Col6a3	3.71e-11	0.837739	0.369	0.181	8.23e-07
Rplp0	8.06e-11	-0.279323	0.871	0.941	1.79e-06
Slc25a3	1.07e-10	-0.542895	0.361	0.604	2.37e-06
Dlx5	1.12e-10	-0.421853	0.473	0.741	2.49e-06
Tmem123	2.1e-10	0.727347	0.564	0.409	4.66e-06
Ehd4	3.42e-10	-0.606361	0.17	0.4	7.6e-06
Hsp90aa1	3.49e-10	-0.404152	0.494	0.728	7.74e-06
Acadm	3.61e-10	0.685636	0.548	0.376	8.02e-06
Zfp36	3.7e-10	0.620061	0.714	0.629	8.21e-06
Cdkl1	4.08e-10	0.488268	0.261	0.104	9.06e-06
Fam101b	6.82e-10	0.756664	0.369	0.199	1.51e-05
Kcne3	7.34e-10	-0.547934	0.066	0.262	1.63e-05
Ktn1	7.7e-10	0.642485	0.481	0.311	1.71e-05
Egr2	1.61e-09	0.717181	0.303	0.139	3.57e-05
Aldh2	2e-09	0.461004	0.788	0.779	4.43e-05
Nbl1	3e-09	-0.494845	0.141	0.355	6.65e-05
Rpl35	3.53e-09	-0.339031	0.726	0.875	7.85e-05
S100a11	4.7e-09	-0.403738	0.407	0.636	0.000104437
Rn50_X_0752.3	5.26e-09	0.543003	0.266	0.119	0.000116825
Akr1a1	5.69e-09	-0.393683	0.519	0.725	0.00012645
Prdx6	7.91e-09	-0.363899	0.523	0.718	0.000175614
Hspa14	1.46e-08	-0.620381	0.116	0.306	0.000323247
Atp1a1	1.69e-08	0.604415	0.593	0.479	0.000374355
Park7	2.18e-08	-0.496108	0.17	0.367	0.000484775
Rps14	2.63e-08	-0.283915	0.763	0.861	0.000583249
Pdlim1	2.77e-08	-0.253862	0.228	0.472	0.000614998
Bambi	3.19e-08	-0.498868	0.079	0.253	0.000709125
Atp6v0e1	3.21e-08	-0.35085	0.112	0.309	0.000712501
Rpl21	4.03e-08	-0.31133	0.506	0.708	0.0008954
Rpl23a	5.05e-08	-0.316524	0.722	0.842	0.00112053
Rps21.ps1	5.98e-08	-0.322075	0.506	0.731	0.00132758
Them5	6.3e-08	-0.418024	0.261	0.481	0.00139793
LOC100361854	6.93e-08	-0.344496	0.494	0.683	0.00153984
Psmb1	7.24e-08	-0.43769	0.249	0.46	0.00160712
Serf2	7.97e-08	-0.367895	0.548	0.743	0.00176871
Rps3a	8.37e-08	-0.288536	0.685	0.823	0.00185883
Arg2	9.46e-08	-0.475417	0.266	0.481	0.00209991
Ctnnd2	1e-07	-0.496769	0.166	0.359	0.00222236
AY172581.24	1.29e-07	0.298012	0.963	0.95	0.00286904
Atp5j2	1.45e-07	-0.49738	0.278	0.489	0.00322417
Ctsb	1.65e-07	-0.353942	0.336	0.563	0.00366409
Rps11	2.17e-07	-0.282492	0.813	0.887	0.00481205
Aldh1a1	2.37e-07	-0.463478	0.299	0.505	0.00526136
Gstm1	2.64e-07	-0.493289	0.129	0.303	0.00586079
Myof	2.91e-07	0.796214	0.303	0.166	0.00645696
Rps15a	3.04e-07	-0.289205	0.452	0.662	0.00675553
Cd63	3.21e-07	-0.330793	0.398	0.61	0.00713872
Parvb	3.52e-07	-0.418609	0.178	0.37	0.00782531
AABR07065923.1	4.84e-07	-0.354402	0.154	0.335	0.0107386
Tnfrsf19	5.47e-07	-0.371445	0.17	0.347	0.0121373
Anxa2	5.6e-07	-0.301538	0.494	0.683	0.0124279
Stat3	6.59e-07	0.430696	0.427	0.285	0.0146255
Igfbp5	7.8e-07	0.722723	0.386	0.247	0.0173259
Mnat1	9.15e-07	-0.346172	0.112	0.277	0.0203119
Dusp1	1.09e-06	0.537861	0.751	0.68	0.0241038
Scand1	1.2e-06	-0.414186	0.145	0.321	0.0267388
Glrx3	1.37e-06	-0.489877	0.203	0.393	0.0304878
Errfi1	1.53e-06	0.546301	0.477	0.361	0.0340493
Ptgs2	1.75e-06	0.896626	0.357	0.23	0.0388315
Bpgm	1.82e-06	-0.392703	0.124	0.288	0.0403074
LOC498555	1.92e-06	-0.361118	0.336	0.537	0.0426793
Uqcrb	2.03e-06	-0.513556	0.133	0.288	0.0451394
Dact2	2.1e-06	-0.454342	0.149	0.312	0.0466294
H3f3a	2.16e-06	-0.34752	0.485	0.661	0.048073
Phlda1	2.75e-06	0.473581	0.266	0.14	0.0610882
Tpd52l1	2.9e-06	-0.313331	0.257	0.454	0.0644922
Krt17	3.53e-06	0.56283	0.34	0.209	0.0783696
Ppa1	3.74e-06	-0.309546	0.332	0.525	0.0831531
RGD1561590	3.78e-06	-0.400008	0.195	0.365	0.0838607
Map4	4.3e-06	-0.354645	0.203	0.381	0.0955568
Adgra3	4.38e-06	-0.326195	0.116	0.271	0.0971567
Snrpc	4.43e-06	-0.425928	0.187	0.358	0.0982641
Pmepa1	4.96e-06	0.589257	0.369	0.24	0.110234
Htra1	5.14e-06	-0.33591	0.253	0.429	0.114099
Sdf4	5.35e-06	-0.35612	0.104	0.253	0.118895
Tax1bp3	5.66e-06	-0.356301	0.315	0.493	0.125609
Igfbp2	6.07e-06	-0.381793	0.353	0.533	0.134874
Dhrs3	6.21e-06	-0.406619	0.187	0.352	0.137794
Rhoc	6.8e-06	-0.271796	0.282	0.481	0.150902
Rdh10	6.85e-06	-0.27419	0.166	0.346	0.152102
Eno1	6.94e-06	-0.354745	0.17	0.336	0.1542
Eif1ax	7.24e-06	-0.325586	0.22	0.4	0.160796
Cox7c	7.36e-06	-0.377376	0.485	0.658	0.163326
Nop58	7.37e-06	-0.278207	0.166	0.335	0.163675
Tead2	7.77e-06	-0.426408	0.203	0.373	0.172598
LOC100362149	9.07e-06	-0.322177	0.614	0.743	0.201365
Dynlt1	9.48e-06	-0.329688	0.129	0.275	0.210526
Tjp1	9.53e-06	-0.289402	0.274	0.446	0.211651
Sptssa	9.82e-06	0.459743	0.49	0.381	0.217948
Stmn1	9.95e-06	-0.422611	0.456	0.621	0.220847
Gata2	1e-05	-0.279111	0.398	0.568	0.222074
Crip1	1.03e-05	-0.30438	0.253	0.426	0.227788
Rai2	1.07e-05	0.562919	0.27	0.152	0.237497
Rpl22	1.09e-05	-0.284495	0.705	0.801	0.242715
Pitpna	1.14e-05	-0.262791	0.154	0.317	0.252086
Mpzl2	1.25e-05	0.381837	0.311	0.187	0.278086
Nedd4	1.36e-05	0.325758	0.826	0.848	0.301631
Fgfr2	1.47e-05	-0.314298	0.22	0.393	0.32537
Hspb1	1.63e-05	0.467426	0.473	0.368	0.362589
Ppdpf	1.68e-05	-0.27166	0.224	0.39	0.373773
Cd55	1.7e-05	-0.329667	0.344	0.521	0.377092
Capza1	1.96e-05	-0.358682	0.149	0.298	0.435873
Sorbs2	2.07e-05	-0.307101	0.174	0.333	0.459621
Atp5d	2.14e-05	-0.438877	0.191	0.355	0.474303
Gadd45b	2.15e-05	-0.369004	0.461	0.63	0.477782
Dctn2	2.36e-05	-0.342184	0.124	0.265	0.524018
Minos1	2.44e-05	-0.316291	0.344	0.524	0.540864
Snrpb	2.73e-05	-0.403106	0.253	0.409	0.605874
Eif3f	2.94e-05	-0.278399	0.253	0.435	0.652602
Cops5	3.08e-05	-0.49334	0.149	0.288	0.684318
Prdx2	3.12e-05	-0.28762	0.473	0.65	0.693061
Ppp1ca	3.27e-05	-0.256932	0.29	0.46	0.726266
Tomm7	3.58e-05	-0.33642	0.137	0.275	0.795718
Nr4a1	3.7e-05	0.428968	0.685	0.63	0.822668
Nudt4	4.26e-05	-0.405317	0.191	0.336	0.945459
Ddb1	4.99e-05	-0.284053	0.266	0.437	1
Cox6b1	5.01e-05	-0.271125	0.253	0.426	1
Tceb2	5.05e-05	-0.288397	0.241	0.4	1
Igf2r	5.3e-05	0.655941	0.373	0.269	1
Lurap1l	5.31e-05	-0.366752	0.145	0.28	1
Spint1	8.24e-05	-0.362695	0.162	0.303	1
Ivns1abp	9.08e-05	-0.317391	0.149	0.282	1
Snx5	0.000112414	-0.302525	0.149	0.283	1
Rpl31l4	0.000113553	-0.288401	0.353	0.518	1
Srsf1	0.000115596	-0.255184	0.357	0.539	1
Rpl22l1	0.000125172	-0.321522	0.299	0.458	1
Arc	0.000131145	0.595742	0.282	0.183	1
Psma2	0.000155476	-0.339649	0.174	0.309	1
Sub1	0.0001629	-0.289365	0.415	0.575	1
Kcnk1	0.000164611	0.448037	0.432	0.332	1
Ssr2	0.000165713	-0.260401	0.29	0.441	1
Emid1	0.000169127	-0.341368	0.154	0.28	1
Psmb5	0.000187934	-0.26435	0.158	0.291	1
Rnd3	0.000191066	-0.387995	0.315	0.454	1
AY172581.9	0.000195535	0.337232	0.954	0.918	1
Atf4	0.000205909	-0.259335	0.432	0.581	1
Psmc2	0.000208539	-0.26684	0.191	0.33	1
Rps27a.ps1	0.00020967	0.259752	0.83	0.823	1
Ddah2	0.000210276	-0.343694	0.162	0.285	1
Serbp1	0.000214329	-0.25797	0.585	0.755	1
Dsp	0.000222838	0.409207	0.423	0.321	1
Thumpd1	0.000227115	0.592808	0.357	0.266	1
Slfn2	0.00026096	-0.332369	0.199	0.336	1
Tma7	0.000262216	-0.355371	0.315	0.466	1
Celsr2	0.000280796	0.5228	0.311	0.221	1
Tns3	0.000286213	0.52105	0.336	0.239	1
Txn1	0.000307698	-0.29715	0.56	0.665	1
Cdc42se1	0.000308463	-0.296208	0.141	0.262	1
Mdh2	0.000309399	-0.349605	0.212	0.339	1
Eif4a3	0.00031661	-0.281663	0.174	0.303	1
Psma7	0.000341779	-0.262022	0.357	0.513	1
Atp2b1	0.000348485	-0.263179	0.27	0.419	1
Slc25a4	0.00035516	-0.286419	0.494	0.642	1
Nfkbiz	0.00036297	-0.256802	0.207	0.335	1
Ssrp1	0.000380055	-0.290442	0.245	0.379	1
Magoh	0.000382387	-0.268907	0.141	0.259	1
Cct5	0.000388619	-0.3157	0.228	0.362	1
Rn60_1_2212.4	0.000439038	0.260269	0.851	0.851	1
Ndufb9	0.000451624	-0.43591	0.195	0.318	1
Mphosph8	0.000464378	0.348833	0.456	0.358	1
Pgam1	0.000493693	-0.300888	0.286	0.419	1
LOC691807	0.000496519	0.456307	0.324	0.233	1
Nedd8	0.000511768	-0.256676	0.278	0.414	1
Pls3	0.000530272	0.352127	0.299	0.207	1
Tuba1b	0.000545508	-0.273815	0.568	0.705	1
Slc25a15	0.000562684	0.340757	0.506	0.423	1
Eif4e	0.000576212	-0.263303	0.174	0.298	1
Cox5a	0.000593621	-0.282992	0.423	0.572	1
Glo1	0.00060185	-0.359796	0.158	0.269	1
Qdpr	0.000632515	-0.413077	0.149	0.259	1
Atp1b3	0.00063657	0.345698	0.494	0.405	1
Psme2	0.000652941	-0.266185	0.299	0.431	1
Tubb4b	0.000667111	-0.305149	0.183	0.307	1
Prelid1	0.000703779	-0.270943	0.158	0.272	1
Hes1	0.000714226	0.30811	0.726	0.706	1
Etfa	0.000777626	-0.27455	0.162	0.285	1
Psmd1	0.000790153	-0.257541	0.241	0.376	1
Cryab	0.00079935	-0.263028	0.17	0.282	1
Ripk4	0.000839177	-0.263193	0.199	0.326	1
S100a16	0.000844795	-0.298846	0.34	0.469	1
RGD1305645	0.000845516	-0.279669	0.145	0.259	1
Dusp5	0.000867702	0.510968	0.386	0.304	1
Sumo1	0.000912879	-0.273667	0.315	0.446	1
Fam89b	0.00107729	-0.259716	0.158	0.275	1
Ddit4	0.00112825	0.654667	0.29	0.207	1
Psmb7	0.00114088	-0.251281	0.166	0.28	1
Klf10	0.00116597	0.295666	0.386	0.294	1
2015-09-06	0.00117155	-0.254207	0.154	0.263	1
Cldn7	0.00118971	-0.274263	0.266	0.39	1
Rpl31	0.00121963	0.266134	0.78	0.776	1
Glod4	0.00126644	-0.271625	0.162	0.269	1
Nr4a2	0.00138363	0.400409	0.44	0.364	1
Nop10	0.00141339	-0.310316	0.149	0.257	1
Cotl1	0.00158943	-0.296575	0.149	0.256	1
Eif6	0.00161145	-0.291014	0.158	0.266	1
Eml4	0.00182666	-0.300001	0.154	0.256	1
Aplp2	0.00186491	0.428191	0.253	0.178	1
Igfbp3	0.00190477	0.411804	0.27	0.195	1
Egr1	0.0019647	0.29756	0.73	0.714	1
Srsf6	0.00227899	-0.2729	0.386	0.516	1
Mab21l3	0.00243679	0.399575	0.34	0.268	1
Ifi27	0.00244365	-0.275219	0.29	0.419	1
Pdlim7	0.00256622	-0.279228	0.253	0.373	1
Tagln2	0.00258633	-0.306337	0.461	0.578	1
Acad11	0.00270337	0.366357	0.29	0.212	1
Eif2s1	0.002908	-0.28928	0.224	0.341	1
Ptma	0.0032841	0.309901	0.448	0.396	1
Eif3c	0.00342259	-0.297197	0.278	0.387	1
Sdhaf2	0.00358041	-0.267213	0.162	0.259	1
Rraga	0.00368098	-0.275549	0.166	0.266	1
Oxr1	0.00373805	0.469769	0.328	0.259	1
Fam60a	0.0038555	-0.251722	0.187	0.294	1
Eci2	0.00389131	-0.283686	0.199	0.301	1
Hspa5	0.00392597	0.421178	0.581	0.537	1
Ppp2cb	0.00424824	-0.252216	0.365	0.49	1
Rheb	0.00447295	0.283962	0.477	0.417	1
Snrpd3	0.00476402	-0.272466	0.32	0.434	1
Meis1	0.00484308	-0.256666	0.295	0.406	1
Cd164	0.00514162	0.447983	0.498	0.47	1
LOC102549726	0.00516904	-0.292524	0.187	0.283	1
Crabp2	0.00518029	-0.25579	0.245	0.349	1
Cct8	0.00529006	-0.317373	0.266	0.37	1
Cox7b	0.00590699	-0.253488	0.237	0.347	1
Add3	0.00613846	0.343011	0.444	0.382	1
Fat1	0.0061839	0.313254	0.286	0.213	1
Bzw2	0.00643397	-0.27127	0.29	0.402	1
Pdcd4	0.00656272	0.298911	0.593	0.568	1
Gspt1	0.00674895	-0.379051	0.216	0.311	1
Gstp1	0.00706809	0.33493	0.382	0.318	1
Eif3i	0.00781632	-0.303015	0.187	0.28	1
AABR07019088.1	0.00783668	0.311002	0.411	0.353	1
Cyr61	0.00790563	0.366596	0.751	0.778	1
Nfat5	0.00832395	0.384532	0.419	0.356	1
Ift20	0.00838307	-0.292644	0.199	0.289	1
Atp2a2	0.00879746	0.271234	0.423	0.362	1
Tomm22	0.00908377	-0.250856	0.224	0.327	1
Pcna	0.00984185	-0.272834	0.249	0.35	1
Papss1	0.0106466	0.402808	0.382	0.336	1
Zfp36l2	0.0107224	0.536765	0.411	0.353	1
Mt.nd5	0.0130893	0.598032	0.793	0.778	1
Slc38a2	0.0146356	0.262262	0.685	0.654	1
LOC691427	0.0161928	-0.250811	0.199	0.286	1
Ier3	0.0164658	0.286149	0.747	0.706	1
Aqp5	0.0190328	0.389032	0.261	0.198	1
Cxxc5	0.0212288	-0.28887	0.303	0.388	1
Csrp1	0.0214457	0.318187	0.394	0.346	1
RGD1564093	0.0231845	-0.289389	0.245	0.33	1
Wfdc2	0.0243641	0.259948	0.772	0.785	1
Cldn4	0.025757	0.411738	0.527	0.496	1
LOC100909712	0.0264335	0.355977	0.456	0.44	1
Ppp4r2	0.0266264	0.263923	0.324	0.279	1
Fermt1	0.0292659	0.254429	0.303	0.256	1
Atxn2l	0.0339374	0.318149	0.344	0.311	1
F2rl1	0.0415838	0.380339	0.29	0.251	1
Pdia4	0.0497586	0.300584	0.34	0.301	1
Chd3	0.05907	0.253442	0.295	0.248	1
Ahnak	0.0625838	0.378796	0.353	0.321	1
Prkcdbp	0.0632411	-0.301044	0.224	0.291	1
Dstn	0.0954618	0.250394	0.743	0.828	1
Lama5	0.104414	0.270693	0.266	0.228	1
Cebpb	0.104431	0.289131	0.344	0.32	1
Slc44a1	0.111516	0.367	0.382	0.365	1
Rpn1	0.116909	0.269947	0.589	0.569	1
Sertad4	0.134596	0.258886	0.29	0.259	1
Impad1	0.136839	0.25158	0.311	0.28	1
Ubl3	0.154407	0.279532	0.27	0.247	1
Insig1	0.164423	0.251287	0.278	0.245	1
Ptges3	0.195444	0.274924	0.465	0.472	1
AABR07025316.1	0.19882	0.301981	0.261	0.239	1
LOC100365697	0.249379	0.303206	0.34	0.341	1
Atp1b1	0.339769	0.296174	0.261	0.25	1
Grn	0.36864	0.2939	0.34	0.347	1
Mt.nd2	0.382066	0.285021	0.979	0.988	1
Sec14l1	0.406064	0.310762	0.266	0.26	1
Azin1	0.419479	0.273292	0.315	0.324	1
S100a6	0.519757	0.38202	0.299	0.365	1
Tmem165	0.567931	0.285193	0.228	0.263	1
Actn1	0.569621	0.283268	0.328	0.33	1
Vapa	0.581294	0.296423	0.34	0.359	1
Tpbg	0.599443	0.271452	0.257	0.26	1
Slc2a3	0.630778	0.267424	0.261	0.265	1
Lsm6	0.655938	0.393494	0.361	0.382	1
Leprot	0.696658	0.324077	0.245	0.256	1
Rad21	0.697574	0.311763	0.261	0.277	1
Klf4	0.819664	0.270497	0.266	0.275	1
Perp	0.93272	0.265328	0.465	0.519	1
