# Supplementary material for: Single-cell sequencing of neonatal uterus reveals an Misr2+ endometrial progenitor indispensable for fertility
Source: eLife. 2019 Jun 24;8:e46349. doi: 10.7554/eLife.46349 (PMC6650247; doi:10.7554/eLife.46349)
Supplement: Figure 5—source data 1. — Related to Figure 5B and C. [file elife-46349-fig5-data1.xlsx]

## Sheet: Figure 5
unpaired Student’s t test
Time point	Luminal duct height	% endometrium area	Number of glandular ducts		Number of rats (Control)	Number of rats (Treated)
PND 20	p = 0.0006	p = 0.0056	p = 0.0377	PND 20	n=2	n=3
PND 45	p = 0.0397	p = 0.0013	p = 0.0144	PND 45	n=2	n=2
	Luminal duct height	Total area	Endometrium area	Endo. area percentage	Number of glandular ducts
D20.C1	606.589	1.54643e+06	685487	44.3271	3
D20.C2	686.711	1.64784e+06	714479	43.3586	3
D20.T1	145.929	559099	181033	32.3793	1
D20.T2	162.157	369742	108517	29.3494	0
D20.T3	172.729	463524	155950	33.6444	1
D45 C1	1747.13	3.29379e+06	1.80442e+06	54.7827	24
D45 C2	2073.36	3.68621e+06	2.04791e+06	55.5559	29
D45 T1	1074.26	1.78081e+06	676897	38.0106	0
D45 T2	1132.49	2.95979e+06	1.15184e+06	38.9163	1
