# Supplementary material for: Single-cell sequencing of neonatal uterus reveals an Misr2+ endometrial progenitor indispensable for fertility
Source: eLife journal article supplement (doi:10.7554/elife.46349), 2019-06-24
Supplement: supp [file elife_poa_e46349_Figure_2_source_data_1.xlsx]

## Sheet: Figure.2 AAV9 treatment
unpaired Student’s t test				Number of rats (Control)	Number of rats (Treated)
Time point	Luminal duct height	percentage endo. area	PND 3	n=3	n=3
PND 3	p= 0.5305	p = 0.0881	PND 6	n=2	n=2
PND 6	p = 0.0138	p = 0.0286	PND 10	n=1	n=1
PND 20	p = 0.0068	p =0.0096	PND 20	n=2	n=2
	Luminal duct height	No of glandular ducts	Total Area	Endometrium area	Endo. area percentage
DAY3.control.BF64	277.613	0	112197	50313.4	44.844
DAY3. control.BF65	262.216	0	137609	67487.9	49.0431
DAY3. control.BF67	261.217	0	105565	56266.6	53.3002
DAY3. treated.BF66	274.975	0	135058	56371.2	41.7385
DAY3. treated.BF68	257.307	0	105123	44797.9	42.6149
DAY3.treated. BF69	292.182	0	145211	65449.8	45.0722
DAY6. control. AX20	367.967	0	216778	139048	64.1432
DAY6. treated. AX25	106.329	0	77938.5	31338.3	40.209
DAY6. control.AX26	438.157	0	292469	181332	62.0004
DAY6. treated. AX24	107.675	0	105760	49342.7	46.6551
DAY10. control	557.099	0	464384	302381	65.1144
DAY10.treated	160.24	0	166347	72374.1	43.508
DAY20.control1	745.466	10	634729	360066	56.7274
DAY20. treated1	198.809	0	395711	113884	28.7796
Day20. control. BF1(c2)	664.367	7	754940	392611	52.0056
Day20. treated. BF7 (T2)	215.05	0	589246	155828	26.4454
